# Supplementary material for: Spammer group detection and diversification of customers’ reviews
Source: PeerJ Comput Sci. 2021 Apr 9;7:e472. doi: 10.7717/peerj-cs.472 (PMC8049124; doi:10.7717/peerj-cs.472)
Supplement: Supplemental Information 1 — Daraz product reviews dataset with spam and non-spam labels. The dataset also contains sentiments (positive, negative and neutral) and features from review. The dataset is also available at Kaggle: Naveed Hussain, “Daraz Roman Urdu Reviews.” Kaggle, 2021, doi: 10.34740/KAGGLE/DSV/1898516. [file peerj-cs-07-472-s001.xlsx]

## Sheet: (Updated) Daraz sentiments feat
	Product_ID	Customer_Name	Customer_ID	Date	Rating	Spam(1) and Not Spam(0)	Reviews	Sentiment	Features
0	TE111EL1KXNGWNAFAMZ	itzmr7	6702	2019-11-09	1	0	mil gya hai acha hai aur toota howa b nai hai	Positive	['toota']
1	MI543EL02ACXSNAFAMZ	Afridi	396	2016-11-21	5	0	aram sy pocket may aa jta hai aur quality b achi hai	Positive	['aram', 'pocket', 'quality']
2	MI543EL02ACXSNAFAMZ	Muhammed	3710	2018-10-22	2	0	sb sy achi chez apki customer service bhot achi hai aur products b orignal hai	Positive	['customer', 'products', 'orignal']
3	TE111EL1KXNGWNAFAMZ	Ghazanfar	1860	2017-10-06	3	0	back cover acha hai sai cuts hai aur soft b hai kaafi acha hai lakin protector chota hai size may khaas tor b width may lakin touch sai kaam kar rha hai isi hi tarha sensor b sb kuch thek hai aur combination b acha hai	Positive	['back', 'cover', 'cuts', 'soft', 'protector', 'chota', 'size', 'khaas', 'tor', 'width', 'touch', 'sensor', 'thek', 'combination']
4	SO638EL103OUWNAFAMZ	Murtaza iqbal	3778	2017-08-31	4	0	shru may may thumb grip k khalif thi kyu k extra chezy add kar deti thi lakin jb sy meri stock controller ki rubber wire kharab hona churu hoei may ny inn grips ko khared aur may bhot kush ho in pair ko istemail kar k in ko istemaal karna bhot asan hai aur mujhy lagta h inn ko istemaal kar k may acha game khelny wala ban gya ho inn ki quality inn ko acha banati hai aur asan h istemaal may	Negative	['thumb', 'grip', 'chezy', 'stock', 'controller', 'wire', 'grips', 'pair', 'istemail', 'asan', 'ban', 'quality', 'asan']
5	SO638EL103OUWNAFAMZ	Usman	5754	2016-02-14	5	0	may ny ya lya kyu k ya madad karti h acha karni may jb game khelo race wali may ny new nfs ki game liii hai tu meri dost ny bola k tm ya khareed lo iss sy achi tarha game khel lo gi tu phr may ny ya in ka ka pack liay lya ya sirf teezi k lya kaam nai aati balky iss sy dono players ka fyda b hota hai	Positive	['madad', 'new', 'khel', 'pack']
6	SO638EL103OUWNAFAMZ	Rehan	4448	2019-05-18	4	0	mein neh shuru mein yeh haasil karne ki zahmat nahi ki thi lekin ab jab ke mere ps kntrolrz aik bohat barri satah par farsodah ho rahay hain mujhe kaam se kaam ke liye hungami mansoobah talaash karne ki zaroorat hai aur yeh angothay ki girift aik game set hain mere liye match	Positive	['neh', 'haasil', 'barri', 'mansoobah', 'talaash', 'zaroorat', 'girift', 'set', 'match']
7	ON533EL15USCONAFAMZ	Aftab	405	2018-06-15	5	0	iss ka pura packge jis may naya chipset hai aur iss ki keemat b bhot kaam hai baki phone may sy jsy k samsung etc	Negative	['packge', 'naya', 'chipset', 'keemat', 'samsung']
8	ON533EL15USCONAFAMZ	Sikander	5264	2019-01-20	1	0	bohat mehanga kya hai mein iss price brikt mein simsng s ya s kyun nahi khareedon ga daraz nay phone ki qeemat bohat onche kar di hai aur iss se yeh darmiyanay faaslay wala phone nahi bantaa hai iss qeemat mein simsng tamam behtar khususiyaat ke sath behtar hai bekar farokht	Negative	['mehanga', 'khareedon', 'qeemat', 'darmiyanay', 'qeemat', 'tamam', 'bekar', 'farokht']
9	ON533EL15USCONAFAMZ	A compliment	34	2018-03-02	5	0	yeh duniya mein har jagah hai koi kharidari karne se pehlay iss haqeeqat ko jaan len	Positive	['kharidari', 'pehlay', 'haqeeqat']
10	EL818EL01Y4FGNAFAMZ	fizah	6549	2017-01-19	4	0	iss may iss ki cable nai h aur iss k speaker b sai kaam nai karti	Negative	['cable', 'speaker']
11	EL818EL01Y4FGNAFAMZ	Nasir Raza	3959	2017-01-31	4	0	theek hai mein un head tamirati miyaar sooti miyaar battery ke waqt se mutmaen hon qeemat ke liye sab kuch achh is hai yeh bohat umdah nazar atay hain aur kaam bhi karwa letay hain iss liye mujhe koi baat nahi hai iss ke sath mamlaat	Positive	['head', 'miyaar', 'miyaar', 'battery', 'waqt', 'qeemat', 'umdah', 'karwa']
12	EL818EL01Y4FGNAFAMZ	Waseeb Rehman	5913	2016-11-14	5	0	un head phone ke baarey mein mera tajurbah bohat acha raha hai mujhe yeh itna pasand aya hai ke mein nai un mein se ko order diya hai yeh guzashta mah se istemaal kar raha hon aur un ke miyaar ke sath kisi maslay ka saamna nahi karna para awaz aur taamer ka miyaar kaafi acha hai aur battery taqreeban ghantay jari rehti hai	Positive	['head', 'tajurbah', 'pasand', 'order', 'guzashta', 'miyaar', 'maslay', 'saamna', 'awaz', 'taamer', 'miyaar', 'battery', 'taqreeban', 'ghantay']
13	EL818EL01Y4FGNAFAMZ	Asfandyar	987	2017-06-14	2	0	jaizay dekhnay ke baad khareeda gaya lekin mujhe imandaar bitayen badter head phone awaz ka miyaar bohat kaam hai taamer bhi aam hai usay nahi khareedain kuch paisay shaamil karen aur kuch acha khareedain	Positive	['imandaar', 'head', 'awaz', 'miyaar', 'taamer', 'paisay', 'shaamil']
14	EL818EL01Y4FGNAFAMZ	N	3834	2017-02-28	2	0	iss mein koi ox kibl shaamil nahi hai mein ny aik aks kibl khareedi hai aur usay apne laip taap se marboot kar di hai mein sirf head phone ke baen taraf se audio sun sakta hon durust numera	Positive	['shaamil', 'aks', 'khareedi', 'marboot', 'head', 'taraf', 'audio', 'durust']
15	EL818EL01Y4FGNAFAMZ	Shoaib	5219	2016-05-24	5	0	ya chez wkt p aa gai thi aur kaam b sai kar rhi hai	Neutral	['wkt']
16	EL818EL01Y4FGNAFAMZ	Taha Khan	5497	2016-10-16	3	0	in k headphone ziyda buri nai hai lakin may kaho ka k inn ko na khareedo	Negative	['headphone', 'ziyda', 'buri']
17	MI543EL0W5CEMNAFAMZ	Qamar Ali	4221	2017-12-16	5	0	may koi acha phone nai jaanta market may ya pura packge hai style ka money ka	Positive	['jaanta', 'market', 'packge', 'style', 'money']
18	MI543EL0W5CEMNAFAMZ	Ammar qazi	768	2017-07-10	1	0	may ny order kya tha mi a in golden aur unho ny rose gole bejha hai mujhy	Neutral	['order', 'mi', 'golden']
19	MI543EL0W5CEMNAFAMZ	Zafar	6030	2019-12-15	5	1	portrait mode bhot acha iss phone k camera may baki sb b acha hai sb sy ziyda google update achi hai	Positive	['camera', 'ziyda', 'update']
20	MI543EL0W5CEMNAFAMZ	M Ahtisham	2758	2017-05-16	5	0	bhot hi acha phone hai ya speed b achi hi aur language ka masla b nai h	Positive	['speed', 'language', 'masla']
21	MI543EL0W5CEMNAFAMZ	Hassan	2115	2019-12-10	5	1	achi timing hai sirf dino may agya hai	Neutral	['timing']
22	MI543EL0W5CEMNAFAMZ	Atif	1079	2018-07-06	5	0	sirf thori se price ziyda hai agar international market k mukabaly dekha jya tu	Positive	['thori', 'ziyda', 'international', 'market', 'mukabaly', 'dekha']
23	TD807EL1AHT5INAFAMZ	Danish Abbas	1395	2018-07-21	5	1	audio achi hai base k sath	Positive	['audio', 'base']
24	TD807EL1AHT5INAFAMZ	Sarim	4924	2019-12-11	5	1	shukriya achi quality k lya mujhy pasnd hai iss ki audio	Positive	['quality', 'audio']
25	TD807EL1AHT5INAFAMZ	Ahmed Raza	468	2019-12-25	5	1	shukriya achi quality k lya aur iss ki audio b achi hai	Positive	['quality', 'audio']
26	TD807EL1AHT5INAFAMZ	Ali Mansoor	618	2016-07-27	5	1	iss ki quality achi hai aur baki sb b acha hai	Positive	['quality']
27	TD807EL1AHT5INAFAMZ	mohsin	6893	2016-07-01	5	0	sb sy acha product achi price may iss k earphone b achi hai zaroor liay aap b shukriya daraz	Positive	['earphone']
28	TD807EL1AHT5INAFAMZ	Munir Iqbal	3760	2016-05-28	5	0	base achi hai baki sari chzey b achi hai iss k lya price b kaam hai	Positive	['base']
29	TD807EL1AHT5INAFAMZ	Aamir Naeem	128	2016-10-20	5	1	audio ki quality achi hai aur baki sb chezy b balance hai	Positive	['audio', 'quality', 'chezy', 'balance']
30	AP728EL0UY9BQNAFAMZ	Irfan Ahmad	2342	2019-03-10	4	0	achi mobile hai lakin iss ki koi warenty nai hai	Positive	['warenty']
31	AP728EL0UY9BQNAFAMZ	Rana	4381	2017-02-25	2	0	may ny iphone lya us p straches hai aur box b sai sy band nai hai	Negative	['straches', 'box', 'band']
32	IN545EL0DUHCSNAFAMZ	Saqib	4895	2016-07-28	1	0	iss k batter ie k issues hai aur customer service center sy b koi acha response nai aa rha	Positive	['batter', 'issues', 'customer', 'response']
33	IN545EL0JSTEKNAFAMZ	Zahid	6040	2018-06-20	5	0	vaqata aik behtareen phone karkardagi aur istehkaam ke hawale se yeh iss qeemat mein bay misaal hai taham yeh phone thora sa bhaari aur bara hai mazeed yeh ke phone ke sath faraham kardah ka shafaaf cover bhi thora sa dheel hai	Positive	['vaqata', 'behtareen', 'hawale', 'qeemat', 'misaal', 'bhaari', 'bara', 'faraham', 'shafaaf', 'cover']
34	IN545EL0JSTEKNAFAMZ	Ã˜Â¹Ã˜Â¨Ã˜Â¯Ã˜Â§Ã™â€žÃ™â€¦Ã˜Â§Ã˜Â¬Ã˜Â¯	7511	2016-11-02	5	0	battery timing aur mobile bhot acha kaam kar rha hai hai	Positive	['battery', 'timing']
35	IN545EL0JSTEKNAFAMZ	Danish	1394	2017-11-29	5	0	sb sy acha phone hai agar aap sy ko huwai k sath compare kry tu	Neutral	['compare']
36	SA609EL14GQ9ONAFAMZ	Ali	589	2017-05-28	1	0	mein nai phone bazyaft kya aur mein nai dekha ke iss khanaay mein dosra haath huawei ie tha aur daraz bhi iss ki jagah nahi le rahay hain woh keh rahay hain ke yeh un ka phone nahi hai	Negative	['dekha', 'haath']
37	SA609EL14GQ9ONAFAMZ	Maryam	3047	2018-05-10	5	0	sb sy acha product hai sirf din may mil gya hai price b kaafi kaam hai	Neutral	['din']
38	SA609EL14GQ9ONAFAMZ	Abid	275	2018-12-09	4	0	plz mujhy bta di k ya single ya dual sim wala hai	Neutral	['single', 'dual', 'sim']
39	IN545EL0JSTEKNAFAMZ	Irshad	2361	2019-10-05	5	0	sb sy achi deal hai may bhot kush ho istemail kar k	Positive	['deal', 'istemail']
40	SA609EL14GQ9ONAFAMZ	Awais	1110	2019-12-25	5	0	yeh vaqata aik acha tajurbah tha mein jaldi tarseel aur zabardast ke liye daraz ki tareef karta hon sale saal warranty card ke sath mukammal tor par original hai tajdeed shuda nahi shukriya daraz aur dealer	Positive	['vaqata', 'tajurbah', 'jaldi', 'zabardast', 'tareef', 'warranty', 'card', 'mukammal', 'tor', 'original', 'tajdeed']
41	SA609EL14GQ9ONAFAMZ	Abdul	164	2016-05-06	5	0	bhot acho deal h din may hi phone mil gya hai	Neutral	['deal', 'din']
42	SA609EL14GQ9ONAFAMZ	Hashim	2096	2017-09-14	4	0	usay din baad mil gaya warranty card bhi shaamil hai asli simsng mohar ke sath chairr chhar ki gayi thi lekin aik aur mohar barqarar thi majmoi tor par acha tajurbah ab tak koi masla nahi hai aik shafaaf cover bhi shaamil hai	Neutral	['din', 'warranty', 'card', 'shaamil', 'asli', 'mohar', 'mohar', 'barqarar', 'majmoi', 'tor', 'tajurbah', 'masla', 'shafaaf', 'cover', 'shaamil']
43	SA609EL14GQ9ONAFAMZ	Adnan Sukhera	363	2017-09-06	5	0	may ny socha nai tha k din may phone aa jya ga bhot acha tha pura box band tha bhot achi daraz	Positive	['din', 'box', 'band']
44	SA609EL14GQ9ONAFAMZ	Wasi	5921	2017-12-27	5	0	shukriya daraz apka product orignal tha	Positive	['orignal']
45	SA609EL14GQ9ONAFAMZ	Zain	6067	2018-01-28	2	0	order din mein haasil karliya lekin mein mobile ki mohar ke baray mein qadray mutfiq hon kyunkay wahan du aam and pi sale mojood thay jin mein se aik pehlay hi khuli thi aur un dono muhroon ke neechay simsng neh aik aur mohar laga di thi ke agar mohar toot gaya hai tu yeh baat qubool nahi karti hai aur yeh toot gaya hai baichnay walay ko yeh bhi zikar karna chahiye ke woh kun sa model farokht kar…	Negative	['order', 'din', 'haasil', 'mohar', 'baray', 'qadray', 'wahan', 'mojood', 'pehlay', 'khuli', 'neechay', 'neh', 'mohar', 'mohar', 'toot', 'toot', 'baichnay', 'model', 'farokht']
46	MI543EL02ACXSNAFAMZ	Muhammad Sami	3629	2018-08-01	5	0	yeh har aik ke liye aisa zabardast tool hai jo mustaqil tor par chal raha hai mein mutadid aliktranks le kar aata hon aur jab zaroorat ho tu sakt mein un sab ko plug karna asan hota hai aur yahan kahan hai yeh asan ho jata hai	Positive	['zabardast', 'mustaqil', 'tor', 'mutadid', 'zaroorat', 'plug', 'asan', 'asan']
47	MI543EL02ACXSNAFAMZ	Muhammad	3482	2017-11-23	4	0	quality sab kuch hai aur mujhe khushi hai ke aam aayi ka power bank khud se charge rakhnay mein aur mere phone par bhi bohat aaccha kaam kar raha hai aam ai each ke l it yeh vaqata good aaccha hai mere phone par du baar charge karta hai aur iss ki minofikchrng ka miyaar bhi bohat aaccha hai	Positive	['quality', 'khushi', 'power', 'bank', 'charge', 'vaqata', 'good', 'charge', 'miyaar']
48	TE111EL1KXNGWNAFAMZ	Asad	966	2019-06-13	4	0	glass muhafiz aur naram case back dono waqai achi terhan se tayyar hain aur jab se mein ne box khoola mein ne jo kuch pohanchaya iss se mutmaen hogaya bilkul tayyar bohat mazboot aur mein usay yakeeni tor par qabil aetmaad kahoon ga kyunkay yeh ab taq kaam kar raha hai aur yahan taq ke sab se ziyada garam dinon mein glass bhi nahi phataa hai	Positive	['glass', 'muhafiz', 'naram', 'case', 'back', 'box', 'pohanchaya', 'tor', 'qabil', 'aetmaad', 'garam', 'dinon', 'glass', 'phataa']
49	IN545EL0GG4NGNAFAMZ	Ali	589	2017-04-21	1	0	bhot bura phone hai iss ki battery sai hai lakin screen tooti hoei hai aur touch b sai kaam nai kar rha	Negative	['battery', 'screen', 'tooti', 'touch']
50	IN545EL0GG4NGNAFAMZ	Abdul	164	2019-03-02	5	0	ya kaafi faydy mad h mry lya kaafi achi device hai	Positive	['mad', 'device']
51	EL818EL01Y4FGNAFAMZ	.	12	2019-02-07	5	0	bhot aala headphne hai quality b avhi hai aur ghanty ki battery timing b hai	Positive	['headphne', 'quality', 'ghanty', 'battery', 'timing']
52	EL818EL01Y4FGNAFAMZ	Ali	589	2017-01-26	1	0	barah karam mein sanjeeda hon yeh nah khareedain un mein ziyada se ziyada imkaan hai ke woh aap ko is p ke bajaye ghalat numeral den ge jo head phone mujhe mila hai usay astodyo s kaha jata hai aur iss mein aks kibl bhi nahi tha iss ka jhoot	Negative	['ghalat', 'head', 'aks']
53	EL818EL01Y4FGNAFAMZ	Shifa Taif	5215	2019-11-16	4	0	waqai mein bohat aaccha hai aur mujhe yeh pasand hai kyunkay mujhe iss par moseeqi suneney se lutaf aata hai head phone ka miyaar bhi aaccha hai aur mein usay pehantay hue hamwar mehsoos karta hon kisi terhan ki jalan ka sabab nahi bantaa hai mein neelay rang ki terhan bhi karta hon yeh aasani se mere phone ke sath munsalik hota hai aur mein ganoon ko aasani se tabdeel karsaktha hon aur mutlaq sa…	Positive	['pasand', 'moseeqi', 'lutaf', 'head', 'miyaar', 'hamwar', 'mehsoos', 'jalan', 'neelay', 'rang', 'aasani', 'munsalik', 'ganoon', 'aasani', 'tabdeel', 'sahoolat', 'hajam', 'tabdeel', 'chahta', 'battery', 'waqt', 'kharidari']
54	EL818EL01Y4FGNAFAMZ	Ubaid	5652	2017-07-04	4	0	mujhy iss ki cable nai mili iss k daby may	Negative	['cable', 'daby']
55	EL818EL01Y4FGNAFAMZ	Leeka Bhatti	2727	2016-11-20	4	0	yeh head phone apni qeemat ke mustahiq hain mein ne d film dekhnay ke liye apne ail dd ke sath sirf aik baar iss ka istemaal kya hai aur mera tajurbah herat angaiz tha awaz ke miyaar aur kaan ke ird gird aram da aur pursukoon fitting se mohabbat karta tha iss ke ilawa iss ka range bohat aaccha hai kyunkay mein apni ail dd se bohat daur tha aur phir bhi iss mein koi mudakhlat nahi mili mawaad bhi …	Negative	['head', 'qeemat', 'mustahiq', 'film', 'tajurbah', 'herat', 'angaiz', 'awaz', 'miyaar', 'kaan', 'gird', 'aram', 'pursukoon', 'fitting', 'mohabbat', 'range', 'daur', 'majmoi', 'tor', 'behtareen', 'qeemat']
56	EL818EL01Y4FGNAFAMZ	SOHAIB HASSAN	4600	2017-03-16	4	0	yeh lajawab hain yeh herat angaiz tor par qabil samaat hain aur khushgawar jamaliaat hain woh pahannay mein bohat aram da hain mere phone ke ke sath jaldi se mutabqat pazeer aur un head phone ke baray mein sab se umdah baat yeh hai ke woh kisi bhi taar ke sath nahi atay hain jo werzish ya chalanay ke douran aap ke pasandeeda music se lutaf andoz hotay hue aap ko ulajhti hai ya pareshan karti hai …	Positive	['lajawab', 'herat', 'angaiz', 'tor', 'qabil', 'samaat', 'khushgawar', 'pahannay', 'aram', 'jaldi', 'mutabqat', 'head', 'baray', 'umdah', 'taar', 'werzish', 'chalanay', 'douran', 'pasandeeda', 'music', 'lutaf', 'pareshan', 'jim', 'pareshani', 'music', 'lutaf', 'neh', 'moseeqi', 'mukhtalif', 'aazmaaya', 'moseeqi', 'tafseel', 'lutaf', 'mehsoos', 'qabil']
57	EL818EL01Y4FGNAFAMZ	Sarfraz Masood	4922	2018-05-03	1	0	dosray ke baarey mein nahi jantay lekin meri pi ki battery hafton ke baad faut hogayi agar mein iss se charge karta hon tu head phone bohat garam hojata hai jaisay yeh phatne wala hai aur mujhe nahi maloom ke mein iss ki jagah le sakta hon ya nahi lehaza jawab den	Positive	['dosray', 'battery', 'hafton', 'charge', 'head', 'garam', 'phatne', 'maloom']
58	ON533EL0MR9HUNAFAMZ	Customer	1375	2019-07-07	5	0	may bhot kush ho iss ko liay k	Positive	[]
59	SO638EL103OUWNAFAMZ	Mehmood	3099	2019-04-07	5	0	may dekh rha ho k kuch order karo daraz sy	Negative	['order']
60	SO638EL103OUWNAFAMZ	Wrong Packaging	5947	2017-07-10	1	0	thumb grip lya hai achi hai lakin picture may kuch aur chez dekhai hai aur ya orb sy b nai h	Positive	['thumb', 'grip', 'picture']
61	SO638EL103OUWNAFAMZ	Obaid	4122	2016-11-28	5	0	item acha hai may sb sy kaho ga k liay lo	Positive	[]
62	SO638EL103OUWNAFAMZ	y2j	7428	2019-10-04	4	0	yeh aik achi numeral hai sirf aik masla yeh hai ke mujhe apne hukum se yeh mila hai ke design ke angothay ki du laathi hain lekin mujhe aik hi design ki charon cheeze mil gayeen	Positive	['masla', 'design', 'design', 'cheeze']
63	MI543EL0W5CEMNAFAMZ	Taufique	5577	2016-06-14	5	0	may iss ko istemaal kya aur ya bhot achi hai	Positive	[]
64	MI543EL0W5CEMNAFAMZ	haseeb	6611	2018-06-18	4	0	phone acha hai lakin kaafi mehanga hai bahar ki market k mukabaly may	Positive	['mehanga', 'market', 'mukabaly']
65	ON533EL0MR9HUNAFAMZ	Ishtiaq	2383	2017-12-19	4	0	translucent case nai h daby may	Neutral	['translucent', 'case', 'daby']
66	ON533EL0MR9HUNAFAMZ	Pervaiz akhtar	4177	2019-11-01	5	0	ya kaafi acha phone hai asa mobile aur kahi nai h	Positive	[]
67	SO638EL103OUWNAFAMZ	Haider Ali Bhatti	1969	2017-02-06	5	0	pi s kntrolr girift mein bunyadi tor par mere angothay aur stick ke mabain ragar muhayya karta hai taakay paicheeda injaam day saken jis mein mukhtalif harkato ki zaroorat hoti hai lehaza yakeeni tor par ghanton gimng ke baad mere haath paseenay ho jatay hain aur yeh meri satah taq khelna mushkil hojata hai aik bohat hi umdah sakht jo mere angothon ko apni jagah par rakhnay mein muawin hai	Negative	['kntrolr', 'girift', 'tor', 'stick', 'ragar', 'muhayya', 'paicheeda', 'injaam', 'day', 'mukhtalif', 'zaroorat', 'tor', 'ghanton', 'haath', 'paseenay', 'mushkil', 'umdah', 'sakht', 'angothon', 'muawin']
68	SO638EL103OUWNAFAMZ	Khawaja Waleed	2648	2016-05-15	5	0	ya bhot acha tha aur mujhy iss ki grips ki quality achi lagi bhot	Positive	['grips', 'quality']
69	SO638EL103OUWNAFAMZ	Talha Qaser	5540	2018-05-11	5	0	mere jaisay paseenay walay haath walay logon ke liye thumb stick girift bohat achi hai mera anghutha hamesha chhari se waisay hi phisal jata tha lekin shukar hai ke yeh paseenay ke angothay ke sath bhi mazboot girift muhayya karta hai mazeed yeh ke mein yeh haqeeqat pasand karta hon ke jab aap pehli jori pehantay ho tu aik izafi jori bhi shaamil hoti hai mere kntrolr ke ilawa achh addition izafay…	Negative	['paseenay', 'haath', 'logon', 'thumb', 'stick', 'girift', 'shukar', 'paseenay', 'girift', 'muhayya', 'haqeeqat', 'pasand', 'jori', 'izafi', 'jori', 'shaamil', 'kntrolr', 'wajah', 'majmoi', 'zindagi']
70	MI543EL0W5CEMNAFAMZ	Aslan	1047	2017-12-03	5	0	ya phone wakai bhot acha hai	Neutral	[]
71	MI543EL0W5CEMNAFAMZ	Zeeshan	6135	2017-12-15	5	0	bhot acha phone h khaas tor b fringer print sensor aur daul cam	Neutral	['khaas', 'tor', 'print', 'sensor', 'cam']
72	TD807EL1AHT5INAFAMZ	Shazaib Aslam	5149	2018-11-16	5	1	audio ki quality bhot achi hai aur base b	Positive	['audio', 'quality', 'base']
73	TD807EL1AHT5INAFAMZ	Waleed Ali Asif	5862	2017-07-06	5	1	audio bas wali h aur case ki quality bhi achi h	Positive	['audio', 'case', 'quality']
74	TD807EL1AHT5INAFAMZ	Ali Mansoor	618	2019-05-19	5	1	achi quality aur achi awaz hai maza aya istemaal kar k	Positive	['quality', 'awaz', 'maza']
75	TD807EL1AHT5INAFAMZ	Numan Tanveer	4115	2016-07-01	5	1	iss ki keemat kaam aur bhot achi chez h us sy ziyda hai jo may ny mangi thi	Positive	['keemat', 'ziyda', 'mangi']
76	TD807EL1AHT5INAFAMZ	Azan	1161	2017-08-19	5	1	saaf awaz aur achi base bhot achi qualty k sath	Positive	['saaf', 'awaz', 'base', 'qualty']
77	IN545EL1ID634NAFAMZ	Syed Khawar	5407	2019-04-15	3	0	ya acha nai hai bhot mayoos kya inflix ny inflix samrt bhot acha hai smart sy	Neutral	['mayoos', 'smart']
78	TD807EL1AHT5INAFAMZ	Waheed	5838	2017-12-10	1	0	iss keemat may range awaz ki bht buri hai	Negative	['keemat', 'range', 'awaz', 'buri']
79	SA609EL14GQ9ONAFAMZ	Bilal	1273	2019-11-27	5	1	aik din may product mil gya orignal seal tha aur price b kaam thi market sy	Negative	['din', 'orignal', 'seal', 'market']
80	SA609EL14GQ9ONAFAMZ	Saad	4618	2017-07-17	5	1	ya sb sy acha phne h ab tk	Neutral	['phne']
81	SA609EL14GQ9ONAFAMZ	Mohamamd Asad	3210	2018-10-12	5	0	hbl feast sy phone lya jo bhot acha hai	Neutral	['feast']
82	SA609EL14GQ9ONAFAMZ	Hatim	2143	2017-01-22	5	0	daraz ke zareya zabardast khidmat mera package din ke andar mousool hogaya aur mobile uine haqeeqi aur sale tha jis cheez ne mujhe sab se ziyada pareshan kya shabash daraaz	Positive	['zabardast', 'khidmat', 'package', 'din', 'mousool', 'haqeeqi', 'pareshan', '']
83	NO611EL0B4ND4NAFAMZ	Adeel	319	2016-06-25	4	0	ya acha tajurba hai daraz sy chezy leny ka	Positive	['chezy']
84	NO611EL0B4ND4NAFAMZ	M.Mutahar	2838	2017-04-29	5	0	arrey nokia team mera naam muther ahmed hai aur mere paas youtube channel hai aur mein aap ki masnoaat ka jaiza lena chahta hon mera youtube video youtu bay yvwthmig ka link yeh hai mera mil	Neutral	['team', 'naam', 'youtube', 'channel', 'masnoaat', 'chahta', 'youtube', 'video', 'link']
85	HB430EL0MGDOKNAFAMZ	Muneeb Sheikh	3754	2017-07-16	5	0	awaz achi bettery timing b achi hai zaoor kharedy	Positive	['awaz', 'bettery', 'timing']
86	HB430EL0MGDOKNAFAMZ	Junaid	2513	2019-04-29	5	0	bhot acha h ya quality b bht achi hai aur battery timing b	Positive	['quality', 'battery', 'timing']
87	ON533EL0GSXG2NAFAMZ	Irfan	2341	2016-09-03	5	0	yeh waqai aik acha phone hai screen karkardagi khususiyaat camera aawaz battery sab bohat achay hain baichnay wala bhi bohat taawun karta hai	Positive	['screen', 'camera', 'aawaz', 'battery', 'baichnay', 'taawun']
88	ON533EL0GSXG2NAFAMZ	bill	6440	2019-12-01	5	0	islamabad mein aik din ke andar yeh aala masool sun hwa	Positive	['din', 'masool']
89	ON533EL0GSXG2NAFAMZ	Nabeel	3856	2016-02-21	5	0	shandaar phone khaas tor par qeemat di gayi hai aik karkardagi ka muzahira karne wala janwar aur dish charger ke sath adhay ghantay ke muawzay mein aik din ke liye jana achchhaa hai zabardast taiz sun hwa chehra aur finger print stock android tajurbah ke qareeb waqai parcham bardaar qaatil honay ke liye saakh ke mustahiq hain	Neutral	['shandaar', 'khaas', 'tor', 'qeemat', 'janwar', 'dish', 'charger', 'ghantay', 'din', 'zabardast', 'taiz', 'chehra', 'finger', 'print', 'stock', 'android', 'tajurbah', 'qareeb', 'parcham', 'qaatil', 'mustahiq']
90	ON533EL0GSXG2NAFAMZ	Syed Usama Nasir	5448	2017-05-27	5	0	mein ny aaj yeh phone khareeda hai aur yeh iss behtareen phone hai jo aap ko iss budget mein mil sakay ga behtareen karkardagi kaam roshni wali soorat e haal mein kamera itna achchca nahi hai warna aik achchca soda hai	Positive	['behtareen', 'budget', 'behtareen', 'roshni', 'kamera', 'soda']
91	ON533EL0GSXG2NAFAMZ	Zain	6067	2016-02-05	5	0	mein ne abhi yeh phone khareeda hai aur mein iss ki karkardagi se waqai herat zada hon ke lafzi phone kabhi hang nahi hota hai jee bi reem aur camera quality wala snap drign processor bhi kaafi herat angaiz hai ab chunkay hum mein se bohat se logon ne yeh phone khareeda hai mein sirf umeed karsaktha hon ke iss ki market value barqarar hai sab kuch bohat achchca hai mein iss ki tawaqqa nahi kar ra…	Positive	['herat', 'hang', 'camera', 'quality', 'snap', 'processor', 'herat', 'angaiz', 'logon', 'umeed', 'market', 'value', 'barqarar', 'tawaqqa', 'tor', 'shikast']
92	ON533EL0GSXG2NAFAMZ	Rizwan	4492	2018-12-13	4	0	mein ne aik saal ki guarantee ke sath yeh pakd box mein haasil kya hai lekin yeh sale phone thora sa mehanga hai yeh pachaas kilometer ke lag bhag hona chahiye	Negative	['guarantee', 'pakd', 'box', 'haasil', 'mehanga']
93	ON533EL0GSXG2NAFAMZ	Shaheer Ahmed	5026	2016-11-27	3	0	one plus tea ko budget ke parcham bardaar qaatil ke tor par jana jata hai kya baat hai agar iss ki qeemat itna hi hai jitna aik parcham bardaar qeemat ziyada se ziyada k ke lag bhag honi chahiye	Negative	['plus', 'tea', 'budget', 'parcham', 'qaatil', 'tor', 'qeemat', 'parcham', 'qeemat', '']
94	ON533EL0GSXG2NAFAMZ	Danyal	1415	2016-07-14	5	0	mein ne usay sirf din mein khareeda hai iss se pehlay ke k aan dd mein ab iss ki qeemat mayoos kin hai	Negative	['din', 'pehlay', 'qeemat', 'mayoos', '']
95	TD807EL1AHT5INAFAMZ	Eesa	1513	2016-05-18	5	0	mujhe yeh behtareen thanda free miyaar ka mila hai achi awaz	Positive	['behtareen', 'thanda', 'free', 'miyaar', 'awaz']
96	TD807EL1AHT5INAFAMZ	Tahir	5498	2017-02-05	5	0	yeh air phone bohat acha hai aur yeh sanchay bhi bohat achay miyaar ki hai	Positive	['air', 'sanchay', 'miyaar']
97	TD807EL1AHT5INAFAMZ	Bilal Ahmed	1276	2016-11-30	5	0	yeh super bees free behtareen hai yeh waqai super bees mean hai iss se pyar karen	Positive	['super', 'free', 'behtareen', 'super', 'pyar']
98	TD807EL1AHT5INAFAMZ	Mustafa Jutt	3805	2019-04-02	5	0	awaz aur khatam herat angaiz tha	Positive	['awaz', 'khatam', 'herat', 'angaiz']
99	TD807EL1AHT5INAFAMZ	Hajra Sheikh	1988	2018-12-30	5	0	herat angaiz choti choti cheeze zabardast bus aur zabardast awaz shukriya	Positive	['herat', 'angaiz', 'choti', 'choti', 'cheeze', 'zabardast', 'bus', 'zabardast', 'awaz']
100	TD807EL1AHT5INAFAMZ	Abid Raza	280	2017-06-30	5	0	caring case rakhna aik achi cheez thi aur mein aisi cheez talaash kar raha tha jaisay mein ne case nah honay ki wajah se apne beshtar ko kho diya tha wazeh awaz aur bus ki aik achi miqdaar ke sath audio ka miyaar bhi achchhaa tha lekin koi maskh nahi sun hwa tha aur kaan ke tukre dhaat ke murakkab se banay thay jo aik achchhaa lams tha aur itni achi qeemat ke l eay mein usay har iss shakhs ko wap…	Negative	['caring', 'case', 'rakhna', 'talaash', 'case', 'wajah', 'wazeh', 'awaz', 'bus', 'miqdaar', 'audio', 'miyaar', 'kaan', 'tukre', 'murakkab', 'qeemat', 'shakhs', 'wapas', 'grade', 'chahta', 'puranay', 'tabdeel', 'miyaar', 'wazeh', 'cal', 'button']
101	ON533EL0GSXG2NAFAMZ	Muhammad	3482	2016-12-22	5	0	ya hazar may b mil sakta hai	Neutral	[]
102	TA870EL03M4BKNAFAMZ	Muhammad	3482	2017-09-01	5	0	acha kaam kar rha hai slim hai aur features b thek hai	Positive	['slim', 'features', 'thek']
103	HU610EL07C5PGNAFAMZ	Noor Dar	4077	2019-03-15	3	0	mujhe kal phone mila packing behtareen thi aur lawazmaat bilkul theek thay mein ne raat ko apne phone ko charge kya aur ab aaj yeh charging cable kaam nahi kar rahi hai mein bohat mayoos sun hwa	Negative	['packing', 'behtareen', 'lawazmaat', 'raat', 'charge', 'charging', 'cable', 'mayoos', '']
104	IN545EL01DL8WNAFAMZ	Faheem	1620	2016-06-08	4	0	phone thek hai lakin processor kfi high quality ka hai	Negative	['thek', 'processor', 'high', 'quality']
105	IN545EL01DL8WNAFAMZ	arsamo	6353	2019-05-22	4	0	phone acha hai lakin infinix ki bttery kaam hai	Negative	['bttery']
106	IN545EL01DL8WNAFAMZ	very Smart but Battery time 7 Hours	7392	2018-09-09	2	0	ground lick round karnrz light uch d uch d daraz ki kharidari lekin bohat hi battery battery sirf ghantay chalti hai	Positive	['ground', 'lick', 'round', 'light', 'kharidari', 'battery', 'battery', 'ghantay', 'chalti']
107	SA609EL1490VKNAFAMZ	Awonn shah	1127	2018-10-01	5	0	haae mein iss ki masnoaat ko bohat pasand karta hon agar aap mujhe muft namona bhaijtay hain tu mein iss numeral ko apne facebook account aur apne youtube channel par farogh day sakta hon	Positive	['masnoaat', 'pasand', 'muft', 'namona', 'bhaijtay', 'facebook', 'account', 'youtube', 'channel', 'day']
108	SA609EL1490VKNAFAMZ	Malik	2987	2019-10-23	5	0	mry kuwaish hai k ya phone liay lo	Neutral	[]
109	MI543EL1BT1BCNAFAMZ	Sumeet Kumar	5345	2016-02-12	5	0	daraz ke zareya usay dost ke l for pareshan kya woh iss se mohabbat kar raha hai battery ka waqt achh aa hai aik din mein aik hi charge ziyada rehta hai dono samnay aur peechay kimps ke camera nateeja ko pasand kya	Positive	['pareshan', 'mohabbat', 'battery', 'waqt', 'din', 'charge', 'samnay', 'camera', 'nateeja', 'pasand']
110	MI543EL1BT1BCNAFAMZ	Asad	966	2019-01-22	5	0	pasy poori hoya may zaroor kaho ga k ya phone liay lo	Neutral	['pasy']
111	SA609EL10G96SNAFAMZ	najat	6972	2017-10-19	2	0	may ny note liay hai lki usk auto rotaate aur gysro sensor kaam ny kar raha sai sy	Neutral	['note', 'auto', 'sensor']
112	HU610EL0QXBICNAFAMZ	Miam Gee	3124	2018-01-16	4	0	jaldi mil gya aur phone b acha tha shukriya daraz	Positive	['jaldi']
113	SA609EL0O887SNAFAMZ	Syed Taha Ghayas	5439	2018-01-23	5	0	sb kuch iss phone may bhot acha hai	Positive	[]
114	HO688EL09C7X4NAFAMZ	Zafar Ahmad Khan	6031	2017-11-29	5	0	agli din mila bhot achi quality hai shape b achi aur bki sb bhot acha hai	Positive	['din', 'quality', 'shape']
115	HO688EL09C7X4NAFAMZ	Usman Khichi	5768	2016-08-04	5	0	may ny july ko order kya tha aur ko mil gya bhot acha phone hai	Positive	['order']
116	HO688EL09C7X4NAFAMZ	Usman	5754	2018-04-13	5	0	july ko iss phone ka hukum diya july ki subah usay masool sun hwa sab kuch bilkul kaam kar raha hai aur iss ka back cover bhi mila jis ki mujhe tawaqqa nahi thi masnoaat ki khidmat aur miyaar se bohat khush hon	Positive	['subah', 'masool', 'back', 'cover', 'tawaqqa', 'masnoaat', 'khidmat', 'miyaar', 'khush']
117	ME779EL0NGJIYNAFAMZ	Shahood	5058	2017-02-06	1	0	ya bilkul cahrge ny kar rha aur waha likha tha k acha charge karta hai mujhy pasy wapis chya hai	Neutral	['likha', 'charge', 'pasy', 'wapis']
118	ME779EL0NGJIYNAFAMZ	Farhan	1704	2016-11-28	1	0	bura hai kaam nai kar rha buri baat daraz	Negative	['buri']
119	ME779EL0NGJIYNAFAMZ	Bilal	1273	2017-09-10	5	1	ya incha ka hai acha kaam kar rha hai	Positive	[]
120	ME779EL0NGJIYNAFAMZ	Junaid	2513	2018-06-20	5	0	quality ur pasay bhot achya hai	Negative	['quality']
121	ME779EL0NGJIYNAFAMZ	Javed	2459	2018-09-29	5	0	wire ki lengh b thek hai aur quality b achi hai	Positive	['wire', 'lengh', 'thek', 'quality']
122	NO611EL04Y8VINAFAMZ	irfan	6689	2017-02-22	5	0	yeh herat angaiz phone hai design sab se acha hissa tarseel ka waqt tha mein nay usay sah pehar teen bujey order kya aur aglay din dopehar bujey pouncha diya gaya	Positive	['herat', 'angaiz', 'design', 'hissa', 'waqt', 'teen', 'order', 'din']
123	NO611EL0IN7SENAFAMZ	Rana	4381	2018-07-02	5	0	mein nu muwasilat se nokia aur iss ke lawazmaat khareed raha hon aur wahan mujhe bohat hi kaam waqt muhayya hota hai aur numeral tawaqqa se ziyada aur behtar hai	Positive	['muwasilat', 'lawazmaat', 'wahan', 'waqt', 'muhayya', 'tawaqqa']
124	NO611EL04Y8VINAFAMZ	Irfan	2341	2017-08-16	3	0	nokai bhot bura phone h storage nai h iss may apni pasy waste na karo iss p	Negative	['storage', 'pasy', 'waste']
125	NO611EL0IN7SENAFAMZ	Shehbaz	5166	2016-10-05	1	0	mera phone band ho gya aik hafta usay k bd	Negative	['band', 'hafta']
126	TE744EL0S453KNAFAMZ	Mir Muhammad Bozdar	3161	2016-11-11	5	0	aik majmoi tor par uch good tajurbah jaisay ke phone mein mazkoorah baala tafseelaat aur khususiyaat se bhar poor andaaz mein masool hota hai shukriya daraz aur tally naar	Positive	['majmoi', 'tor', 'good', 'tajurbah', 'tafseelaat', 'bhar', 'andaaz', 'masool']
127	TE744EL0S453KNAFAMZ	Raja Sohail	4355	2016-05-29	5	0	aik hafta ke sath mein ne meri masnoaat haasil ki umdah aur taiz khidmat mein munasib qeemat mein iss numeral se bohat mutmaen hon mein daraz ka bohat mashkoor hon	Positive	['hafta', 'masnoaat', 'haasil', 'umdah', 'taiz', 'khidmat', 'munasib', 'qeemat']
128	TE744EL0S453KNAFAMZ	Naeem	3892	2019-05-02	5	0	achi qulity ka phone hai aur keemat b kaafi kaam hai	Positive	['qulity', 'keemat']
129	TE744EL0S453KNAFAMZ	Hasan	2086	2016-02-29	5	0	mobile v good hai yeh pesey mein sasta aur miyaar mein aaccha hai aik sasta mobile honay ke ilawa mobile mein aam pi back aur aam pi front kamera hai mobile mein version have hai yeh aik achi alamat hai kyunkay sastay mobile mein version get milna nayab hai mein hon mein nai mobile ka tajurbah kya hai yeh bohat aaccha hai iss mein jee bi room hai aur jee bi raam aam mobilon ki terhan isi terhan k…	Positive	['good', 'pesey', 'sasta', 'miyaar', 'sasta', 'back', 'front', 'kamera', 'version', 'sastay', 'version', 'nayab', 'tajurbah', 'room', 'raam', 'khareedna']
130	IN545EL16WF24NAFAMZ	Hareem Fatima	2063	2016-10-12	2	0	varnti card aur har cheez mein ab tak sab se oopar hai	Positive	['varnti', 'card']
131	IN545EL16WF24NAFAMZ	Naresh	3936	2017-07-09	5	0	achi keemat bank alflah discount b di rha hai	Positive	['keemat', 'bank', 'discount']
132	IN545EL16WF24NAFAMZ	Abdullah	231	2018-09-03	5	0	mein nay pehlay thisishypenhere garam thisishypenhere garam aur thisishypenhere note khareed liya mere aakhri tajarbay ke mutabiq yeh garam shehwat angaiz piro behtareen hoga	Positive	['pehlay', 'garam', 'garam', 'note', 'aakhri', 'tajarbay', 'garam', 'angaiz', 'behtareen']
133	SA609EL1D6D34NAFAMZ	Haie	1978	2018-09-20	5	0	mein chnyot se aakhri qareeb order karta hon aur aglay hi din order wusool karta hon asli aur mukammal tor par pack hai	Negative	['aakhri', 'qareeb', 'order', 'din', 'order', 'wusool', 'asli', 'mukammal', 'tor', 'pack']
134	SA609EL1D6D34NAFAMZ	rehman56	7080	2017-07-21	4	0	acha phone hai lakin mila thori dar sy hai	Negative	['thori']
135	SA609EL1D6D34NAFAMZ	Abdul45	219	2019-08-04	4	0	kaafi acha phone hai aur features b achay hai	Positive	['features']
136	IN545EL0AHSLONAFAMZ	Rizwan	4492	2018-09-19	4	0	box mein muhafiz behtareen miyaar ka nahi hai yeh sheeshay ka muhafiz nahi hai daraz dot pi ke par show glass	Positive	['box', 'muhafiz', 'behtareen', 'miyaar', 'sheeshay', 'muhafiz', 'dot', 'show', 'glass', '']
137	IN545EL0AHSLONAFAMZ	Uzi	5789	2017-02-21	5	0	uuuuuururrvvvl mera naya phone bomb chashmi herat angaiz qeemat nuqta aur mujhe khobsorat flask aur khobsorat muqarareen bhi pasand hain jo iss ke sath tohfay ke tor par aye thay	Positive	['naya', 'bomb', 'herat', 'angaiz', 'qeemat', 'khobsorat', 'flask', 'khobsorat', 'pasand', 'tohfay', 'tor', '']
138	SA609EL1D6D34NAFAMZ	Abdul22	217	2016-09-16	5	0	daraz sy khareda hai aur may bhot mutmain ho iss sy	Positive	['mutmain']
139	IN545EL0AHSLONAFAMZ	Ali	589	2016-09-05	5	0	ya sb sy acha phone hai infinix k sb phones may sy	Negative	['phones']
140	IN545EL0AHSLONAFAMZ	Hassan Ali	2118	2017-06-30	4	0	star mega battery ke liye jo aap baar baar chattaan karte hain	Neutral	['mega', 'battery']
141	ME779EL0NGJIYNAFAMZ	Soban Khan	5283	2016-09-04	5	0	din may aa gia h aur speed bhi achi h price k lia	Negative	['din', 'speed']
142	ME779EL0NGJIYNAFAMZ	Safdar	4710	2016-06-02	2	1	ya cable mry phone ko jaldi charge nai kar rhi	Neutral	['cable', 'jaldi', 'charge']
143	ME779EL0NGJIYNAFAMZ	Faizaan	1658	2018-11-11	5	0	din may mila aur sai kaam kar rha hai	Positive	['din']
144	ME779EL0NGJIYNAFAMZ	Saleem	4774	2017-01-13	5	1	speed achi hai aur kaam b bhot achi sy kar rha hai	Positive	['speed']
145	MI543EL0QH2JQNAFAMZ	Anas	792	2018-06-17	4	0	may ny new phone aur ie bhot acha kaam kar rha hai	Positive	['new']
146	MI543EL0QH2JQNAFAMZ	Alamgeer	578	2017-06-14	5	0	may ny iss ko istematl kya aur acha kaam kar rha ya	Positive	[]
147	MI543EL0QH2JQNAFAMZ	Ajmal Hussain	555	2019-12-23	2	0	aam aayi note bohat sust charge hai aur iss mein ghantay se ziyada waqt hai sale charging ke douran yeh bohat garam hai lehaza larke kharidari se pehlay sochte hain aur ost set bhi karte hain lekin daraz pk khidmat bohat achi hain	Positive	['note', 'sust', 'charge', 'ghantay', 'waqt', 'charging', 'douran', 'garam', 'kharidari', 'pehlay', 'set', 'khidmat']
148	MI543EL0QH2JQNAFAMZ	Zahid	6040	2019-01-29	4	0	sb kuch bhot acha aur camra bs thek hi h	Positive	['camra', 'thek']
149	MI543EL0QH2JQNAFAMZ	MS	2889	2019-05-28	5	0	yeh bohat acha hai aur umdah mobile daraz bohat mufeed app hai mein bohat khush hon daraz pk daraz pk ke zariye sab se barray malik mein mobile khareedna	Positive	['umdah', 'mufeed', 'khush', 'barray', 'khareedna']
150	MI543EL0QH2JQNAFAMZ	Aamir	124	2018-09-02	5	0	bhot achi wakt p mil gya hai aur ie deal b bhot achi hai	Positive	['wakt', 'deal']
151	MI543EL06V1KMNAFAMZ	Noman Hussain	4069	2018-12-31	5	0	mujhy mia chya kya aap mujhy asan kisto p di sakti hai	Neutral	['asan']
152	MI543EL06V1KMNAFAMZ	Uzair	5782	2018-09-16	5	0	may ya phone salo sy istemaal kar rhi ho ur ya acha phone h rozana istemaal k lya	Positive	['rozana']
153	MI543EL06V1KMNAFAMZ	arsamo	6353	2017-07-30	5	0	acha phone hai lakin mujhy kaam keemat p chya	Negative	['keemat']
154	HU610EL0E27O8NAFAMZ	Saeed Ahmad	4699	2019-09-29	5	0	mein ne pi khareeda hai yeh acha mobile hai lekin ab iss ke software ko up date karne ke baad mere paas jee bi mein se sirf jee aam free mimori hai yeh karkardagi aur battery ke waqt mein acha mobile hai	Positive	['software', 'date', 'free', 'battery', 'waqt']
155	MI543EL0C169WNAFAMZ	Abdulah	226	2017-01-03	5	0	ki tamam masnoaat ki alla sahet yabi se un ki qeematon mein khobsorat chashmi hai lekin mein delivery service se khush nahi hon daraz express numeral ki farahmi mein taqreeban aa aik hafta laga lehaza angothay iss ke neechay aa jayen	Positive	['tamam', 'masnoaat', 'alla', 'sahet', 'qeematon', 'khobsorat', 'khush', 'farahmi', 'taqreeban', 'hafta', 'neechay']
156	MI543EL03TQDYNAFAMZ	Danish	1394	2016-07-12	5	0	iss hadd mein achh build bil build quality kamera karkardagi aur battery ka waqt rakhnay wala behtareen phone iss terhan ki masnoaat ko mota arif karwnay ke liye usay daraz team ko jari rakhen	Positive	['build', 'build', 'quality', 'kamera', 'battery', 'waqt', 'behtareen', 'masnoaat', 'mota', 'team']
157	MI543EL03TQDYNAFAMZ	Ali	589	2016-05-01	5	0	acha phone h kaam price may camera bs thek hai aur processor b kaafi fast hai	Positive	['camera', 'thek', 'processor', 'fast']
158	MI543EL03TQDYNAFAMZ	Ahsan	486	2017-02-10	3	0	signal ayntina iss phone se kamzor hai camera ost se bhi kaam hai sab se achi cheez triple slat tray hai	Positive	['signal', 'kamzor', 'camera']
159	MI543EL03TQDYNAFAMZ	Abdul Samad	200	2017-01-29	5	0	ya phone bhot acha hai touch kaafi s mooth hai	Positive	['touch']
160	MI543EL03TQDYNAFAMZ	ViDiKHAN	5804	2016-07-03	5	0	ya bhot acha phone hai koi bt ny agar china ka bana h tu baki wsy acha phone hai	Neutral	[]
161	MI543EL03TQDYNAFAMZ	Agha	412	2016-04-30	5	0	may bhot heeran ho inn ki prodect bejhny ki speed sy aur product b bhot achi haalat may hai	Positive	['prodect', 'speed', 'haalat']
162	MI543EL03TQDYNAFAMZ	Imran Tanveer	2304	2019-03-16	5	0	yeh aik herat angaiz mobile hai mein ne pehlay hi aik khareed liya hai aur istemaal kar raha hon iss ko hbl shop feast mein khareedain iss terhan ke herat angaiz discount shopping fistyol ki paish kash par daraz ka shukriya	Positive	['herat', 'angaiz', 'pehlay', 'feast', 'herat', 'angaiz', 'discount', 'shopping']
163	MI543EL03TQDYNAFAMZ	Muzahir	3821	2018-03-15	5	0	mein guzashta saloon se honor si istemaal kar raha hon lekin mustaqbil qareeb mein mera programme note ai khareedna hai jo kaam qeemat mein acha phone hai	Negative	['guzashta', 'saloon', 'mustaqbil', 'qareeb', 'programme', 'note', 'khareedna', 'qeemat']
164	MI543EL0QH2JQNAFAMZ	Umar Amjad	5692	2017-04-26	4	0	mein aaj ke ird gird par order deta hon ghanton mein numeral masool sun hwa bohat jald dilyori service daraz pk se discount ke sath kehte hain mein iss numeral ki karkardagi se khush hon lekin iss ke kamera performance se mayoos hon warna mein dosaron ko bhi iss qeemat mein iss ki qeemat ada karne ki tajweez karta hon shukriya	Negative	['gird', 'order', 'ghanton', 'masool', 'discount', 'khush', 'kamera', 'performance', 'mayoos', 'dosaron', 'qeemat', 'qeemat', 'tajweez']
165	ON533EL1EK5O6NAFAMZ	diyaan	6479	2018-11-09	5	0	acha hai lakin keemat kai ziyda h iss ki	Positive	['keemat', 'ziyda']
166	ON533EL1EK5O6NAFAMZ	Ahsan	486	2017-05-15	5	0	mein simsng aur phir aayi phone ka sarif tha lekin iss ke baad mein koi dosra phone khareedna pasand nahi karta one plus bohat hi zabardast hai	Positive	['khareedna', 'pasand', 'plus', 'zabardast']
167	ON533EL1EK5O6NAFAMZ	Shahzad Sohail	5071	2018-06-30	5	0	acha product hai lkin back cover nai mila galss b aur handfree b ny h	Positive	['back', 'cover', 'galss', 'handfree']
168	ON533EL1EK5O6NAFAMZ	Haalar	1937	2017-05-18	5	0	mehangay honay par tanqeed karne walon ko yeh maloom hona chahiye ke one plus ke paas pakistan mein koi store frnchayz nahi hai aur usay daraamad karne mein paisa lagta hai iss ka chehra lock hai aur finger print scanning dosray number par hai yeh aayi phone x ki nisbat chehra lock ka istemaal karte hue taizi se khoola hai azeem hain sab kuch yeh aik hewan hai	Positive	['maloom', 'plus', 'store', 'paisa', 'chehra', 'lock', 'finger', 'print', 'scanning', 'dosray', 'number', 'chehra', 'lock', 'taizi']
169	ON533EL1EK5O6NAFAMZ	itzz	6703	2016-08-25	4	0	waqai mein kya aik mobile har pehlu se bilkul durust hai lekin qeemat jee bi raam aur jee bi bohat asan hain	Positive	['durust', 'qeemat', 'raam', 'asan']
170	ON533EL1EK5O6NAFAMZ	Zeeshan	6135	2018-04-18	5	0	achi chez hai lakin delivery slow hai back cover aur glass nai mila	Negative	['slow', 'back', 'cover', 'glass']
171	ON533EL1EK5O6NAFAMZ	Ami	724	2016-07-31	4	0	mehanga honay ke bawajood aur isi terhan ki chashmi mili meter ke bawajood iss ki gimng salahiyaton ne usay taweel faaslay se shikast di hai lehaza gimng ke l eay mein kisi aur phone ki sifarish nahi karta hon qeemat thori ziyada hai lekin jee bi internal aur head phone jack bara plus hai	Negative	['mehanga', 'meter', 'taweel', 'shikast', 'sifarish', 'qeemat', 'thori', 'internal', 'head', 'jack', 'bara', 'plus']
172	ON533EL1EK5O6NAFAMZ	Murtajiz	3774	2016-12-13	5	0	aik mahinay se iss phone ka istemaal karte hue kabhi kabhi ta attul ka saamna nahi karna para battery ki zindagi bohat hi umdah hai dekho aur mehsoos karna bohat aaccha hai mujhe lagta hai ke yeh sayarah par apne behtareen phone w r t par har pehlu par hai	Positive	['mahinay', 'saamna', 'battery', 'zindagi', 'umdah', 'mehsoos', 'behtareen']
173	MI543EL00RSIWNAFAMZ	Daniyal Saeed	1413	2018-02-05	5	0	iss qeemat mein zabardast phone great kamera aur battery ka timing sirf chand hi ghanton mein free dilyori	Positive	['qeemat', 'zabardast', 'kamera', 'battery', 'timing', 'chand', 'ghanton', 'free']
174	MI543EL00RSIWNAFAMZ	babar	6402	2016-12-05	4	0	bohat achi pi each aan ki speed achi lekin bohat achay camera jaisay charge karne par bohat garam	Positive	['speed', 'camera', 'charge', 'garam']
175	MI543EL00RSIWNAFAMZ	aiz	6281	2016-10-19	5	0	bhot achi speed hai product pouchany ki tcs k zariya aur stars delivery k lya aur phone k lya b	Positive	['speed', 'tcs']
176	MI543EL00RSIWNAFAMZ	M.Kamran	2834	2018-01-24	5	0	agar aap pakistan mein dastyab qeemat ke tehat iss ki khususiyaat ko dosray sab se mawazna karte hain tu aap ko khardney ke liye aik wajah mil jaye gi	Positive	['dastyab', 'qeemat', 'dosray', 'mawazna', 'khardney', 'wajah']
177	MI543EL00RSIWNAFAMZ	Wasay Bhatti	5911	2018-04-14	5	1	start delivery k lya aur star phone k lya	Negative	[]
178	MI543EL00RSIWNAFAMZ	Saifullah Khan	4737	2019-06-11	5	1	pakistan mein kisi bhi phone ke liye super fast delivery umdah phone zabardast camera zabardast battery bardasht behtareen qeemat ki karkardagi ka tanasub	Positive	['super', 'fast', 'umdah', 'zabardast', 'camera', 'zabardast', 'battery', 'bardasht', 'behtareen', 'qeemat', 'tanasub']
179	MI543EL00RSIWNAFAMZ	Dr.Muneeb	1486	2019-08-27	5	1	tarseel ke liye setaaray jis mein kaam ke din lagey majmoi tor par bohat acha budget wala phone hai jis mein umdah tamirati miyaar aur zabardast chashmi hai	Positive	['setaaray', 'din', 'majmoi', 'tor', 'budget', 'umdah', 'miyaar', 'zabardast']
180	MI543EL00RSIWNAFAMZ	Hassan	2115	2017-02-07	4	1	bhot acha phone hai aur baki sb chezy b bhot achi hai	Positive	['chezy']
181	MI543EL03TQDYNAFAMZ	Malik	2987	2016-11-22	5	0	umdah tamirati miyaar lekin mera mahswara hai ke redmi ke liye jana hai jis mein aik taaqatwar si pi you aur finger print sensor aur aik hi qeemat mein aylominim frame hai	Negative	['umdah', 'miyaar', 'taaqatwar', 'finger', 'print', 'sensor', 'qeemat', 'aylominim', 'frame']
182	MI543EL03TQDYNAFAMZ	umar	7353	2017-12-13	4	0	bhot achi awaz hai battery b achi h	Positive	['awaz', 'battery']
183	MI543EL03TQDYNAFAMZ	Ameer Bhutto	720	2018-10-29	5	0	yeh aik aisa brand hai jis se mein bas itna pasand karta hon kamera battery aur karkardagi se herat angaiz mera mahswara khareedne ke liye jana	Positive	['brand', 'pasand', 'kamera', 'battery', 'herat', 'angaiz', 'khareedne']
184	MI543EL03TQDYNAFAMZ	Abdul	164	2017-05-18	5	0	mein nay yeh aala daraz par khareeda waqt par pouncha poori karkardagi aur achi nazar se poori terhan mutmaen mohabbat ka haath hai intehai halka wazan	Positive	['waqt', 'mohabbat', 'haath', 'intehai', 'halka', 'wazan']
185	MI543EL03TQDYNAFAMZ	Ahsan Ali	489	2019-02-23	5	0	amazing phone mein bohat taizi se processor aur internet acha auto fox kamera hai jo mein usay mein kharidata hon	Positive	['amazing', 'taizi', 'processor', 'internet', 'auto', 'kamera']
186	MI543EL03TQDYNAFAMZ	malik	6837	2018-10-01	5	0	j mujhy handfree mili bhot achi hai shukriya daraz	Positive	['handfree']
187	MI543EL03TQDYNAFAMZ	Abdul Ahad	165	2019-04-10	5	0	mujhe yeh phone flash farokht mein sirf rupay mein mila usay sirf aik din mein pohanchaya gaya khususiyaat herat angaiz hain rang achh aa hai daraz aur smart link	Positive	['flash', 'farokht', 'rupay', 'din', 'pohanchaya', 'herat', 'angaiz', 'rang', 'smart', 'link']
188	ON533EL1EK5O6NAFAMZ	Saqib	4895	2019-10-14	5	0	bhot achi specs hai aur price b kaafi munasib hai	Positive	['specs', 'munasib']
189	ON533EL1EK5O6NAFAMZ	Mani	3015	2018-10-24	5	0	may nii khareed sakta offical launch iss ka	Neutral	['offical', 'launch']
190	ON533EL1EK5O6NAFAMZ	Engr Bilal	1549	2019-02-22	1	0	keemat bhot ziyda iss ki asal keemat hai	Positive	['keemat', 'ziyda', 'asal', 'keemat']
191	ON533EL1EK5O6NAFAMZ	Usman	5754	2019-06-02	5	0	mein daraz par iss ka bohat intzaar kar raha hon kyun ke aan plus phone phone mein aik parcham bardaar qaatil aur ifrit hai	Negative	['intzaar', 'plus', 'parcham', 'qaatil']
192	MI543EL00RSIWNAFAMZ	M. Tauseef	2813	2019-01-08	5	1	bhot acha camera h aur achi specs b hai iss keemat may	Positive	['camera', 'specs', 'keemat']
193	MI543EL00RSIWNAFAMZ	Sidz	5257	2019-08-19	5	1	mein v khush hon iss se kahin ziyada meri umeed ki ja rahi thi mein online site se khareedne se gorezan tha lekin daraz zabardast nokari	Positive	['khush', 'kahin', 'umeed', 'online', 'site', 'khareedne', 'zabardast']
194	MI543EL00RSIWNAFAMZ	rizwan	7089	2018-01-10	5	0	thinks se daraz mein ne aaj waqt ki farahmi mein yeh behtareen aala umdah karkardagi achi screen resolution haasil kya	Positive	['waqt', 'farahmi', 'behtareen', 'umdah', 'screen', 'resolution', 'haasil']
195	MI543EL00RSIWNAFAMZ	Haris	2064	2016-11-02	5	0	din may mila hai bhot acha phone hai	Positive	['din']
196	MI543EL00RSIWNAFAMZ	Ã˜ÂµÃ˜Â¯Ã˜Â§Ã™â€¦	7510	2020-01-03	5	0	iss qeemat mein yeh sab se behtar hai jo mil sakta hai meet se kahin ziyada behtar mohabbat you aam aayi aur thanx daraz	Positive	['qeemat', 'kahin', 'mohabbat']
197	MI543EL00RSIWNAFAMZ	Rao Rizwan	4410	2018-04-23	5	0	iss qeemat ki hadd mein sab se behtareen mobile yeh f ko bhi shikast day sakta hai jo hai	Positive	['qeemat', 'behtareen', 'shikast', 'day']
198	MI543EL03TQDYNAFAMZ	Arsalan	929	2016-04-08	5	0	iss meenat may bhot acha phone mila hai	Positive	[]
199	MI543EL03TQDYNAFAMZ	Taha	5494	2016-04-17	5	0	jab yeh multi ki baat aati hai tu yeh phone ghair mamooli hai aap split screen ki khasusiyat ko baghair kisi karkardagi ke hichki ke istemaal kar saktay hain neez yeh shayad sab se ziyada zaati noiyat ka phone hai jo mein nai kabhi istemaal kya hai user antrfis bohat lachak dar hai	Negative	['mamooli', 'split', 'screen', 'khasusiyat', 'baghair', 'lachak']
200	NO611EL0BDO1QNAFAMZ	khalifa	6769	2016-05-09	1	0	imei num ny valid may ny wbsite p dekh tha lakin ya koi chez ny show krw rha	Neutral	['imei', 'valid', 'show']
201	MI543EL00RSIWNAFAMZ	Raashid	4286	2017-01-24	5	0	blue color afi acha hai aur baki chezy b iss keemat may achi mil gi h	Positive	['blue', 'color', 'chezy', 'keemat']
202	MI543EL00RSIWNAFAMZ	Ahsan	486	2019-11-28	5	0	may ny kal raat order kya aur aaj mil gya tha daraz ki service bhot achi hai	Positive	['raat', 'order']
203	MI543EL00RSIWNAFAMZ	nomi	7006	2019-07-16	5	0	mujhy ya product kal mila kyu k ya lahore sy aaj nikala hi	Neutral	[]
204	MI543EL00RSIWNAFAMZ	yasir	7430	2018-04-19	5	0	mujhy bhot acha lagta ny aur mera phone ab rasty may hai	Positive	[]
205	MI543EL00RSIWNAFAMZ	Arslan Ali	951	2017-10-15	5	0	kya kisi ko ya phone mila h darz sy kyu k ya phely order ki list may show ho rha hai	Negative	['darz', 'order', 'show']
206	MI543EL00RSIWNAFAMZ	Kashif	2596	2016-05-03	5	0	mein nay yeh phone black friday par order kya tha lekin baad qismati se mujhe ziyada se ziyada riayat nahi mili phone ka miyaar paisa ke l aw zabardast aur behtareen qader hai sarkari partners smart link nay order ke aik ghanta mein hi order rawana kardiya se mayoosi hui aur iss phone ko kaam ke dinon mein pohanchaya shukriya daraz pk	Positive	['black', 'friday', 'order', 'qismati', 'riayat', 'miyaar', 'paisa', 'zabardast', 'behtareen', 'qader', 'smart', 'link', 'order', 'ghanta', 'order', 'kardiya', 'mayoosi', 'dinon', 'pohanchaya']
207	IT020EL0V8ZLANAFAMZ	Khizar	2659	2019-06-30	2	0	aa bhot bara h aur weight may b ziyda hai apni tasveer sy	Neutral	['bara', 'weight', 'ziyda', 'tasveer']
208	IT020EL0V8ZLANAFAMZ	Awais wahla	1123	2018-06-16	5	0	bhot acha phone hai kaam keemat may	Positive	['keemat']
209	IT020EL0V8ZLANAFAMZ	Farhan	1704	2018-04-15	5	0	yeh aala nabina afraad ke liye bohat madadgaar zareya hai kyunkay iss mein king voice ke naam se aik khusoosi software mojood hai jo google talk back ki terhan kaam karta hai aspikrz ka miyaar behtareen hai aur phone que mobile aur mobilon ke bar aks mili meter head phone ke jadeed version ki himayat karta hai air pees behtareen cal ka miyaar kirkira hai aur head phone out pitt behtareen hai iss …	Positive	['madadgaar', 'voice', 'naam', 'software', 'mojood', 'talk', 'back', 'aspikrz', 'miyaar', 'behtareen', 'aks', 'meter', 'head', 'jadeed', 'version', 'air', 'behtareen', 'cal', 'miyaar', 'head', 'behtareen', 'qeemat', 'sastay', 'phones', 'aks']
210	IT020EL0V8ZLANAFAMZ	Adnan	344	2016-03-29	3	0	bhot wight h iss ka piture may tu asa ny tha	Neutral	['wight', 'piture']
211	IT020EL0V8ZLANAFAMZ	ZEESHAN	6018	2017-10-20	3	0	phone bhot slow aur weight may ziyda hai	Neutral	['slow', 'weight', 'ziyda']
212	IT020EL0V8ZLANAFAMZ	Hasan	2086	2019-06-03	5	0	bari lcd aur battery b kaafi hai aur orignal hai	Neutral	['bari', 'lcd', 'battery', 'orignal']
213	IT020EL0V8ZLANAFAMZ	MÃ…Â«hÃƒÂ¡mmÃƒÂ¤Ã„â€˜	3833	2018-05-03	5	0	seems wala phone aur screen b bari hai	Neutral	['screen', 'bari']
214	MI543EL00RSIWNAFAMZ	Ijaz	2273	2018-10-22	2	0	hum sab aimi note ka intzaar kar rahay thay lekin bohat mayoos kin baat yeh hai ke hamein qeemat jee bi aur jee bi ki zaroorat hai lekin mein samjhta hon ke jee bi aur jee bi ke sath suit note karen ab mein usay nahi khareedon ga	Negative	['note', 'intzaar', 'mayoos', 'qeemat', 'zaroorat', 'suit', 'note', 'khareedon']
215	MI543EL00RSIWNAFAMZ	Asad	966	2017-08-24	5	0	gigs one ke muqablay mein yeh mukhtalif haalat bohat muashi hai	Neutral	['mukhtalif', 'haalat', 'muashi']
216	MI543EL00RSIWNAFAMZ	Bilal	1273	2017-02-05	2	1	kyun jee bi version farokht par nahi hai yeh ghair munsifana hai yeh hona chahiye warna aap ki farokht bekar hai	Negative	['version', 'farokht', 'munsifana', 'farokht', 'bekar']
217	MI543EL00RSIWNAFAMZ	M toqeer Shahid	2786	2018-04-15	3	0	aam aayi company tarteeb raam mobile jee bi memory jee bi company ke ohdedaron ki website ko dukhaay	Neutral	['tarteeb', 'raam', 'memory', 'website', 'dukhaay']
218	MI543EL00RSIWNAFAMZ	Wasif	5925	2018-08-14	5	0	iss qeemat ki hadd mein yeh aik behtareen phone hai jo khareed sakta hai iss phone ke mobile hafta mein qeematon ka taayun herat angaiz hai shukriya	Positive	['qeemat', 'behtareen', 'hafta', 'qeematon', 'herat', 'angaiz']
219	MI543EL00RSIWNAFAMZ	Ali	589	2017-02-17	5	0	yeh sab rangon mein sab se ziyada pasand kya jata hai bhi iss rang ki sifarish karta hai	Positive	['pasand', 'rang', 'sifarish']
220	MI543EL00RSIWNAFAMZ	Mubashir	3455	2018-03-28	5	1	aizaz x aur dosray se behtareen mobile phone aur iss ka kamera bohat acha hai bijli ki roshni mein kaam haalat bohat taiz hai battery bohat barri hai	Positive	['dosray', 'behtareen', 'kamera', 'bijli', 'roshni', 'haalat', 'taiz', 'battery', 'barri']
221	IT020EL0V8ZLANAFAMZ	Zain	6067	2019-06-03	5	0	iss phone ke liye bohat ziyada aur good seller communication ka bhi	Positive	['good', 'seller', 'communication']
222	IT020EL0V8ZLANAFAMZ	ismail	6699	2019-05-04	5	0	qeemat ke hissay mein yeh phone kaafi hadd tak paish karta hai aur iss ki qeemat ke hissay ko juwaz paish karta hai asal aur mutmaen shukriya daraz pk	Positive	['qeemat', 'hissay', 'qeemat', 'hissay', 'asal']
223	MA305FA1KY528NAFAMZ	Abul Hasan	307	2016-08-08	3	1	pack kyunkay un tea shirts mein se sirf qabil qader thay jabkay un mein se dhoney ke baad skrh gaye thay aur un ka size bilkul mukhtalif tha jo bohat mayoos kin tha aur meri asal tawaquaat ko thais pouncha tha	Negative	['pack', 'tea', 'shirts', 'qabil', 'qader', 'jabkay', 'dhoney', 'size', 'mukhtalif', 'mayoos', 'asal', 'tawaquaat', 'thais']
224	MA305FA1KY528NAFAMZ	Abdullah Shahid	251	2016-02-05	2	0	achi terhan se iss ke sath mera tajurbah mukammal tor par zabardast nahi tha fibrk ka miyaar asal mein achchca tha lekin silai koi achi cheez nahi thi aur gardan ka size waqai bara tha jo aik tha chore do aur inhen dhoney ke baad woh dheelay par gaye aur phir thora sa ghata bhi gaya lekin agar aap un ka mawazna iss qeemat se karte hain jis ki peshkash ki jarahi hai	Negative	['tajurbah', 'mukammal', 'tor', 'zabardast', 'fibrk', 'miyaar', 'asal', 'silai', 'size', 'bara', 'dhoney', 'dheelay', 'ghata', 'mawazna', 'qeemat']
225	MA305FA1KY528NAFAMZ	Suhayb	5333	2016-03-13	3	0	mujhe yeh apne dost ke liye mile hain qmizin iss qeemat mein roz marrah pahannay ke l all bilkul bhi bura nahi hai lekin iss ka mawaad pute cotton nahi hai iss ka aur aam darja hararat mein pahannay ke qabil hai nah sirf garam mausam ke bahar iss ke ilawa rang siyah qmizin neelay aur siyah rangon ki terhan jurey ke dhoney ke baad khatam ho jaien gi iss ke ilawa yeh theek hai kaam karen ge	Negative	['qmizin', 'qeemat', 'roz', 'pahannay', 'cotton', 'darja', 'hararat', 'pahannay', 'qabil', 'garam', 'mausam', 'rang', 'siyah', 'qmizin', 'neelay', 'siyah', 'jurey', 'dhoney', 'khatam']
226	MA305FA1KY528NAFAMZ	Malik Arslan	2989	2019-06-12	3	0	mein nai un shirts ka order diya tha aur sirf apna order haasil kya hai iss nai mujhe safaid ki bajaye peelay rang ki kameez pack mein bhaije hai mujhe peelay rang ki terhan nahi hai	Negative	['shirts', 'order', 'order', 'haasil', 'safaid', 'peelay', 'rang', 'kameez', 'pack', 'peelay', 'rang']
227	TH281FA1M2XW0NAFAMZ	Imtiaz	2314	2019-03-24	1	0	aik herat angaiz miyaar ki shai paison ka mukammal nuqsaan aur ab koi bhi jawab dainay mein nakam rahay ga website sirf aik koshish karte hue aik sweeter ko thora sa torrun bhi mil gaya	Neutral	['herat', 'angaiz', 'miyaar', 'paison', 'mukammal', 'nuqsaan', 'website', 'koshish']
228	TH281FA1M2XW0NAFAMZ	Masroor	3062	2016-04-28	2	0	tasaveer mein dukhaay jane walay se kharab miyaar aur bohat mukhtalif hai dobarah nahi mila	Negative	['tasaveer', 'dukhaay', 'miyaar', 'mukhtalif', 'dobarah']
229	MA305FA1KY528NAFAMZ	Qasim	4232	2017-06-21	5	0	bohat umdah miyaar theek hai waqai iss ko pasand karen garmiyon ke rozana istemaal ke samaan ke l best behtareen	Positive	['umdah', 'miyaar', 'pasand', 'garmiyon', 'rozana', 'samaan', 'best', 'behtareen', '']
230	MA305FA1KY528NAFAMZ	Asad	966	2019-07-15	1	0	mein nay x ail shirts order ki lekin un ke size aur foot mein wazeh farq tha aur shayad hi shirts asal mein xl theen	Negative	['shirts', 'order', 'size', 'wazeh', 'shirts', 'asal']
231	MA305FA1KY528NAFAMZ	Mahnoor Mubashir	2962	2016-12-31	4	0	tea shirts ka packet bohat acha tha mein yeh kehna chahta hon ke yeh rang roshan aur herat angaiz thay bilkul isi terhan tasweer mein size aur fitting bohat zabardast thi aur mujhe tane banay ka miyaar bhi pasand tha isi terhan yeh aik qabil kharidari thi kyunkay yeh mere liye munasib qeemat par dastyab thay	Positive	['tea', 'shirts', 'packet', 'chahta', 'rang', 'roshan', 'herat', 'angaiz', 'tasweer', 'size', 'fitting', 'zabardast', 'tane', 'miyaar', 'pasand', 'qabil', 'kharidari', 'munasib', 'qeemat', 'dastyab']
232	MA305FA1KY528NAFAMZ	umar khattak	7355	2016-05-30	4	0	theek hai iss qeemat ke baarey mein mein yeh kahoon ga ke yeh qmizin bohat umdah hain meri raye mein tane banay ka miyaar bhi mohazab hai un shirts ke baarey mein sab se achi baat yeh hai ke woh qeemat khareedain jis mein woh qabil husool hain silai bohat achi hai size tamam smae thay aur fitting behtareen hai mein ne un ko sirf aik baar dhoya tha aur iss mauqa par kisi maslay ka saamna nahi karn…	Positive	['qeemat', 'qmizin', 'umdah', 'tane', 'miyaar', 'shirts', 'qeemat', 'qabil', 'silai', 'size', 'tamam', 'fitting', 'behtareen', 'maslay', 'saamna']
233	TH281FA1M2XW0NAFAMZ	Usman	5754	2017-06-05	1	0	shioulders nai thi aur quality b achi ny h	Negative	['shioulders', 'quality']
234	TH281FA1M2XW0NAFAMZ	Abid Khan	279	2016-04-22	2	0	mein ne iss farosh di ajmiri se baghair kisi ka order diya tha aur jab mujhe meri order item mousool sun hwa tu unhon ne apni shaamil kardah bot mein baghair aasteen ki tasaveer bhi dikhain andar drop sweeter baghair kisi aasteen ke bajaye mojood hain yeh waqai ghair munsifana hai	Positive	['baghair', 'order', 'order', 'mousool', 'shaamil', 'bot', 'baghair', 'tasaveer', 'drop', 'baghair', 'mojood', 'munsifana']
235	SA609SP0ZEP3INAFAMZ	adeel303	6256	2018-01-03	5	0	shipping taiz thi haqeeqi hai ab tak iss smart watch se khush hai iss mein bohat kaar amad khususiyaat hain	Positive	['taiz', 'haqeeqi', 'smart', 'watch', 'khush']
236	MA305FA0WF10CNAFAMZ	Ahmad	430	2018-12-08	5	0	lahore may din may mila	Neutral	['din']
237	MA305FA0WF10CNAFAMZ	Farheen	1723	2017-04-03	5	0	acha color aur size b acha h kaafi	Positive	['color', 'size']
238	MA305FA0WF10CNAFAMZ	Arif shahbaz	907	2016-09-19	5	0	yeh aik umdah numeral hai bohat naram aur achay miyaar ka mawaad aik size guide shaamil ki jaany chahiye taakay sahih size aasani se muntakhib hosakay	Positive	['umdah', 'naram', 'miyaar', 'size', 'guide', 'shaamil', 'size', 'aasani', 'muntakhib']
239	SA609SP0ZEP3INAFAMZ	Roohan	4526	2019-10-08	5	0	mujhy bhot acha laga product	Positive	[]
240	SA609SP0ZEP3INAFAMZ	Shehzad	5177	2018-03-28	5	0	mujhe aik taaza pan pack tukda yani simsng gear asport ki farahmi ke liye daraz pi ke ka bohat shukar guzar hon iss ka orig original aur mohar pack meri pehli baar online kharidari karne ki itni mehngi cheez hai lekin aik haqeeqi cheez ko haasil karna daraz pk par mukammal aetmaad development hai	Positive	['taaza', 'pack', 'tukda', 'gear', 'farahmi', 'shukar', 'original', 'mohar', 'pack', 'online', 'kharidari', 'mehngi', 'haqeeqi', 'haasil', 'mukammal', 'aetmaad', 'development']
241	SA609SP0ZEP3INAFAMZ	Bilaltistic	1294	2017-07-29	5	0	tarseel fori azeem masnoaat thi mein aik arsay se gear devices istemaal kar raha hon gear s tha lekin yeh meri kalayi ke liye bohat bara tha lekin yeh bilkul kaamil hai har cheez aik jaisi hai jo behtar hai behtar water proofing hai lehaza mein iss mein mili meter sirf aik kharabi honay ke baad bhi koi tyar sakta hon agarchay koi speaker nahi hai lekin agar aap iss ke sath teraaki karna chahtay h…	Negative	['masnoaat', 'gear', 'devices', 'gear', 'kalayi', 'bara', 'water', 'proofing', 'meter', 'kharabi', 'speaker', 'qabil']
242	SU455FA18NJ18NAFAMZ	Rehan	4448	2017-03-23	1	0	aaj mila aur battery kaam nai kar rhi	Positive	['battery']
243	SU455FA18NJ18NAFAMZ	Shahrukh	5063	2019-02-01	4	0	cha hai lakin adjust ny ho rha wsy ach hai	Positive	['adjust']
244	SU455FA18NJ18NAFAMZ	daredemon	6475	2018-07-19	3	0	yeh sab se sasta hai lekin kisi cheez se tawaqqa ki jati hai jis ki laagat sirf rs hai size adjust nahi hai lekin agar aap ki kalayi barri hai tu woh theek foot hogi iss baat ka yaqeen nahi hai ke agar bache usay pehan satke hain kyunkay yeh bohat dheela hoga	Negative	['sasta', 'tawaqqa', 'size', 'adjust', 'kalayi', 'barri', 'yaqeen', 'bache', 'pehan', 'dheela']
245	SU455FA18NJ18NAFAMZ	Abdul Hadi	173	2016-06-15	2	0	ie mry wrist p nai aa rha mry koi help kry	Neutral	['wrist', 'help']
246	SU455FA18NJ18NAFAMZ	Bilawal	1295	2017-01-04	4	0	ya acha hai keemat k nisbat	Positive	['keemat']
247	SU455FA18NJ18NAFAMZ	Asad A.	967	2017-05-13	4	0	iss paisa ke l anything kisi khaas cheez ki tawaqqa nahi kar raha tha aur iss mein sab se ziyada chhuut bhi shaamil thi lekin pata chala ke iss ki tashheer kis terhan ki jati hai button ko chone par waqt dekhata hai aur injeer barray aur numaya hotay hain bache usay pasand karen ge	Negative	['paisa', 'khaas', 'tawaqqa', 'shaamil', 'tashheer', 'button', 'waqt', 'dekhata', 'barray', 'numaya', 'bache', 'pasand']
248	SH069FA039PJONAFAMZ	talha	7321	2016-10-26	2	0	aik tea shirt ka miyaar bilkul theek hai aur dosra sifar hai doosri baat choti achi nahi hai aur yeh lachak dar kapra nahi hai stuff	Positive	['tea', 'miyaar', 'doosri', 'choti', 'lachak', 'kapra', 'stuff']
249	SH069FA039PJONAFAMZ	Moeez	3206	2018-06-23	1	0	mein nay un shirts ka order diya tha lekin aik sahih hai aur dosra bhi foot hai	Negative	['shirts', 'order']
250	SH069FA039PJONAFAMZ	Qashi	4229	2016-07-29	4	0	quality acha tha sirf bazoun par buri terhan silai karna	Negative	['quality', 'bazoun', 'buri', 'silai']
251	SH069FA039PJONAFAMZ	Noman	4066	2018-02-10	5	0	yeh zabardast shirts aap ki qeemat par munhasir hai mein usay star deta hon yeh achi baat hai	Positive	['zabardast', 'shirts', 'qeemat']
252	SH069FA039PJONAFAMZ	Rana	4381	2018-02-25	4	0	yeh aik v good tajurbah tha aur tarseel ki raftaar bhi achi hai aur bhi acha hai	Positive	['good', 'tajurbah', 'raftaar']
253	SH069FA039PJONAFAMZ	Nasir Ahmed	3952	2016-04-10	1	0	shirt size haqeeqat ke mutabiq nahi mein ne barri kharidari ki lekin yeh haqeeqat mein barray size ki hesiyat se nahi hai neez samaan bohat kharab hai	Negative	['size', 'haqeeqat', 'barri', 'kharidari', 'haqeeqat', 'barray', 'size', 'samaan']
254	SH069FA039PJONAFAMZ	Umer	5704	2019-08-31	5	0	dono shirts behtareen miyaar ke hain aur samaan bohat umdah aur aram da hai	Positive	['shirts', 'behtareen', 'miyaar', 'samaan', 'umdah', 'aram']
255	SH069FA039PJONAFAMZ	Waqas Rashid	5901	2016-06-01	1	0	mein ne dono x ail size ka order diya lekin aik chhota size ka hai aur dos foot nahi hai woh sahih size nahi dete hain nahi kharedtay hain	Negative	['size', 'order', 'chhota', 'size', 'size']
256	AY536FA0JL0UANAFAMZ	jawad	6726	2016-08-21	5	0	achi quality hi mujhy kl mila order	Negative	['quality', 'order']
257	AY536FA0JL0UANAFAMZ	Nadeem	3881	2017-01-11	5	0	meri shirt ka size hai jis ka size thx hai	Neutral	['size', 'size']
258	AY536FA0JL0UANAFAMZ	Hasan	2086	2019-02-17	5	0	kaam tar ghanton mein fori tarseel aam un shirts se mutmaen hai aur uski tadaad mein uch quality miyaar hai	Negative	['ghanton', 'shirts', 'tadaad', 'quality', 'miyaar']
259	DA291SPGVVZSNAFAMZ	Hassan Iqbal	2123	2016-10-20	1	0	numeral iss cheez se mukhtalif hai jo unhon nay apni website mein katoti ki hai iss mein chhota sa dial karna parta hai yahan taq ke touch bohat kharab hai aur koi munasib af aal mein nay iss numeral ko daraz pk se order nahi kya jab yeh pouncha tu yeh bilkul mukhtalif hai yeh ghari sirf paison ki barbadi hai	Negative	['mukhtalif', 'website', 'katoti', 'chhota', 'dial', 'touch', 'munasib', 'order', 'mukhtalif', 'paison']
260	DA291SPGVVZSNAFAMZ	Qazi Raza	4250	2018-04-20	5	0	theek hai mein iss ghari ka mukammal jaiza likhoon ga pehli nigah mein tamam af aal darj hain dil ki sharah oxygen blood pressure monitor iqdamaat aur faasla counter mujhe wajohaat durust maloom hui hain lekin baaz auqaat thora sa daur bhi mujhe it tila aat ki khasusiyat pasand hai halka wazan hai aur kalayi ke aas paas theek mehsoos hota hai aur takleef nahi deta hai majmoi tor par yeh aik achi …	Negative	['mukammal', 'nigah', 'tamam', 'dil', 'blood', 'pressure', 'monitor', 'iqdamaat', 'durust', 'maloom', 'daur', 'khasusiyat', 'pasand', 'halka', 'wazan', 'kalayi', 'mehsoos', 'takleef', 'majmoi', 'tor', 'smart']
261	MA305FA1KY528NAFAMZ	Shayam Malik	5145	2018-01-03	4	0	un shirts mein sirf ghalti fitting thi woh halki si dheeli thi bilkul jald tang nahi thi un ke baarey mein baqi sab kuch haqeeqat mein bohat achchca tha silai bohat achchca tha meri raye mein tane banay ka miyaar bhi achchca tha mere paas hai asal mein ab un mein se aik du baar istemaal sun hwa hai aur un ko bhi dhoya hai aur yeh waqai aik achchca muawin tha koi masla nahi	Negative	['shirts', 'ghalti', 'fitting', 'halki', 'dheeli', 'tang', 'haqeeqat', 'silai', 'tane', 'miyaar', 'asal', 'muawin', 'masla']
262	MA305FA1KY528NAFAMZ	Muzammal Parvez	3825	2017-04-30	3	1	s pack se meri sirf tashweesh yeh hai ke un tea shirts mein se aik mere liye kisi kaam ke nahi aya kyunkay iss tea shirt ki gardan bohat barri hai jis ki wajah se iss ko mushkil se pahannay ke qabil banaya jata hai iss pehlu ke ilawa deegar achay thay aur rang bhi achay thay tane banay ka miyaar theek tha aur yeh tea shirts pahannay mein bhi aram mehsoos karti theen	Negative	['pack', 'tashweesh', 'tea', 'shirts', 'tea', 'barri', 'wajah', 'mushkil', 'pahannay', 'qabil', 'banaya', 'rang', 'tane', 'miyaar', 'tea', 'shirts', 'pahannay', 'aram', 'mehsoos']
263	MA305FA1KY528NAFAMZ	Muhammad Ramzan	3614	2018-02-23	5	1	aik zabardast pack aur iss se ziyada tasalii bakhash kharidari se ziyada qeemat jis ki wajah se yeh tea shirts dastyab theen rang herat angaiz thay aur yeh tea shirts mujhe bohat achi terhan se foot karti hain aur khaas tor par jeans ke sath bohat sajeela lagtay hain kapray ki quality bhi bohat hai achchca hai aur yeh mere liye bohat faida mand hain mutmaen	Positive	['zabardast', 'pack', 'tasalii', 'bakhash', 'kharidari', 'qeemat', 'wajah', 'tea', 'shirts', 'dastyab', 'rang', 'herat', 'angaiz', 'tea', 'shirts', 'khaas', 'tor', 'jeans', 'sajeela', 'kapray', 'quality', 'faida']
264	MA305FA1KY528NAFAMZ	Shahid Khan	5036	2016-11-02	3	1	theek hai mein nai yeh shirts haal hi mein khareedi hain aur yeh mukammal tor par achha tajurbah nahi raha hai un shirts ka miyaar bilkul itna achha nahi hai halaank mein rang v gardan design aur yahan taq ke iss ke miyaar ko bhi pasand karta tha tane banay lekin un ke sath masla yeh hai ke mein nai un ko dhoney ke baad un ki terhan dheeli ho gayi jis ke baray mein mein vaqata khush nahi tha dosr…	Negative	['shirts', 'khareedi', 'mukammal', 'tor', 'tajurbah', 'shirts', 'miyaar', 'rang', 'design', 'miyaar', 'pasand', 'tane', 'masla', 'dhoney', 'dheeli', 'baray', 'vaqata', 'khush', 'dosray', 'tajurbah', 'mukammal', 'tor', 'shirts', 'susti', 'masla']
265	MA305FA1KY528NAFAMZ	Munazzah Mirza	3747	2016-08-15	5	1	herat angaiz numeral iss ki herat angazi se haath neechay kar rahay hain aur qamizoon ka packet bohat achchhaa hai yeh paanchon hi rastay thay jis terhan se mein chahta tha lekin jis ka mein ne hukum diya tha iss se sirf aik zara kaam tha agarchay yeh aik hi design aur nazar aata tha waghera mein ne medium size ka order diya tha lekin un mein se aik barri thi aur fitting ka maamla bhi thora sa bu…	Negative	['herat', 'angaiz', 'herat', 'haath', 'neechay', 'qamizoon', 'packet', 'rastay', 'chahta', 'design', 'medium', 'size', 'order', 'barri', 'fitting', 'miyaar', 'pahannay', 'aram', 'patli', 'tareef', 'kapray', 'rang', 'miyaar', 'dhoney', 'rang', '']
266	AY536FA11G0ZMNAFAMZ	Zohaib	6167	2019-06-04	5	0	koi compromise nai h kapry ki quality may	Negative	['compromise', 'quality']
267	AY536FA11G0ZMNAFAMZ	Emaan	1538	2019-08-10	5	0	bhot acha product ur kapra hai	Positive	['kapra']
268	AY536FA11G0ZMNAFAMZ	jiya	6737	2019-09-11	5	0	aybeez aik h online ki duniya may	Neutral	['aybeez', 'online']
269	AY536FA11G0ZMNAFAMZ	imran	6674	2019-09-14	5	0	bhot achi qulity aur mutasir kun product h	Positive	['qulity', 'mutasir']
270	AY536FA11G0ZMNAFAMZ	arbaz	6343	2018-11-16	5	0	bura nai h acha kaam kya aybeez	Negative	['aybeez']
271	GE310FA1HFXXGNAFAMZ	Najeeb Ahmed	3924	2018-03-25	1	0	mein iss ki sifarish nahi karta hon ke mein ne hukum diya ke yeh sirf aik ghanta pehlay mil gaya hai aur abhi wapas agaya hai iss ke paas app nahi hai touc panel aur kuch nahi karen ge mujhe umeed hai ke mujhe apna paisa wapas aajay g	Positive	['sifarish', 'ghanta', 'pehlay', 'wapas', 'touc', 'panel', 'umeed', 'paisa', 'wapas']
272	GE310FA1HFXXGNAFAMZ	Nauman Aziz	3970	2016-02-08	3	0	bura nai h iss keemat may	Negative	['keemat']
273	GE310FA1HFXXGNAFAMZ	Kiran	2689	2019-03-15	2	0	bohat kharab numeral pehlay pallay store par koi app dastyab nahi thi baar baar cal noon mails ke baad mujhe app ke liye vindr ko hadayat di gayi app ab install hogayi hai lekin gharri ka khud band hojata hai aur dobarah nahi khoola jata hai yeh aap ke pesey lout raha hai mein apni raqam ki masnoaat par zaya honay par bohat pareshan hon mein ne usay sirf aik din ke liye istemaal kya aur iss ka me…	Negative	['pehlay', 'store', 'dastyab', 'cal', 'mails', 'install', 'band', 'dobarah', 'pesey', 'raqam', 'masnoaat', 'pareshan', 'din', 'faida']
274	GE310FA1HFXXGNAFAMZ	zarak	7465	2016-11-17	1	0	band ke liye jayen iss mein tamam khususiyaat hain jaisay qadam counter dil ki sharah alarm keel notification aur din ka battery back up aap ko kabhi pachtaawa nahi hoga thnax	Negative	['band', 'tamam', 'dil', 'alarm', 'notification', 'din', 'battery', 'back', '']
275	GE310FA1HFXXGNAFAMZ	Yaaas	5965	2018-11-14	5	0	mujhe yeh kaar amad maloom sun hwa iss ki hooshiyar shakal ki wajah se iqdamaat ki ginti hoti hai aur iss mein caller aayi dd zz bhi dekhata hai	Negative	['maloom', 'hooshiyar', 'shakal', 'wajah', 'iqdamaat', 'ginti', 'caller', 'dekhata']
276	GE310FA1HFXXGNAFAMZ	Ms. Hina	3423	2019-12-24	4	0	yeh fitness band nah sirf aik intahi susti kharidari hai balkay yeh faalit mein waqai uch good hai yeh mujhe baghair kisi muawza ke pohanchaya gaya tha lehaza mein nahi jaanta tha ke yeh muawza khatam sun hwa hai ya kharab yahan taq ke mein nai iss par charge kya aur ab iss ki ziyada se ziyada salahiyat par kaam karna gharri halkay wazan ki hai kaafi paidaar hai aur iss mein har woh cheez hai jis…	Positive	['fitness', 'band', 'susti', 'kharidari', 'good', 'baghair', 'pohanchaya', 'jaanta', 'khatam', 'charge', 'salahiyat', 'wazan', 'paidaar', 'ishtihar', 'band', 'band', 'mehfooz', 'munsalik', 'wajah', 'mustahkam', 'calls', 'paighamaat', 'tamam']
277	GE310FA1HFXXGNAFAMZ	Nadeem	3881	2017-09-22	1	0	mujhe yeh kaam kuch din pehlay hi mila tha lekin yeh charge karne ke baad zahir karta hai lekin yeh ziyada se ziyada minute tak jari rehta hai daraz se mutabadil ke muntaqili ke muntazir hai ke yeh kaisay chalta hai	Negative	['din', 'pehlay', 'charge', 'zahir', 'minute', 'mutabadil', 'kaisay', 'chalta']
278	GE310FA1HFXXGNAFAMZ	Umair Virk	5681	2019-02-02	1	0	battery achi hai taqreeban teen din ka back up lekin jab aap iss gharri mein ularam ko adjust karte hain ya jab bhi cal msg aata hai tu iss se kampan hojata hai aur jab mein chal nahi raha hon iss waqt bhi un iqdamaat ki tadaad mein izafah hota hai jab mein jaagta hon tu ziyada tar yeh ularam ki wajah se kampan ke qadmon bcz ka kehna hai iss numeral ka maqsad mere liye chalanay ke liye hai iss ki…	Positive	['battery', 'taqreeban', 'teen', 'din', 'back', 'ularam', 'adjust', 'cal', 'msg', 'waqt', 'iqdamaat', 'tadaad', 'izafah', 'ularam', 'wajah', 'maqsad', 'chalanay', '']
279	GE310FA1HFXXGNAFAMZ	Mir Uraib Talpur	3162	2020-01-17	1	0	kuch kamon se miyaar ke kaam ka faida zaya karna mujhe pasand nahi tha lekin mere muamlay mein iss ka andaaz thora sa hai lekin mein usay sirf aur sirf style ke liye istemaal karsaktha hon ke mein sirf waqt dekh sakta hon	Positive	['kamon', 'miyaar', 'faida', 'pasand', 'andaaz', 'style', 'waqt']
280	GE310FA1HFXXGNAFAMZ	Bilal	1273	2018-11-28	3	1	yahan ki qeemat hai lekin woh hazaar aur kuch aur bhaij dete hain	Positive	['qeemat']
281	SA609FA0BYZXWNAFAMZ	Mohsin	3243	2017-12-14	5	0	ya new brand hai aur watch bhot achi hai	Positive	['new', 'brand', 'watch']
282	SA609FA0BYZXWNAFAMZ	Burhan	1319	2017-04-10	1	0	poooray dial mein hain waqt par pohanchaya lekin kya baat hai jao usay kisi dukaan se khareedain mera pehla aur inshaa allah aakhri baar daraz se koi mehngi cheez khareedna sabaq seekh liya gaya	Positive	['poooray', 'dial', 'waqt', 'pohanchaya', 'dukaan', 'pehla', 'allah', 'aakhri', 'mehngi', 'khareedna', '']
283	SA609FA0BYZXWNAFAMZ	Adnan	344	2019-05-08	5	0	iss ghari ko kuch arsa pehlay khareeda gaya iss daur ki behtareen smart watch behtareen haalat mein masool hui acha farokht kanandah ezoom pk	Positive	['pehlay', 'daur', 'behtareen', 'smart', 'watch', 'behtareen', 'haalat', 'masool', 'farokht', 'ezoom', '']
284	SA609FA0BYZXWNAFAMZ	Mohsin	3243	2016-07-10	5	0	umdah bilkul site par bayan ki gayi tafseelaat ke mutabiq	Neutral	['umdah', 'site', 'tafseelaat']
285	SH069FA039PJONAFAMZ	Waqas	5888	2016-08-30	2	0	mein ne barray size ka order diya kameez theek thi aur bilkul foot bithti hai aur dosra rasta bohat tang tha plus cheeze achi nahi hain	Negative	['barray', 'size', 'order', 'kameez', 'tang', 'plus', 'cheeze']
286	SH069FA039PJONAFAMZ	Asad	966	2016-09-13	4	0	cheezon se poori terhan mutmaen hon aur size bhi kaamil hai	Positive	['cheezon', 'size']
287	SH069FA039PJONAFAMZ	Ubaid	5652	2019-02-19	1	0	tasweer mein dikhatay hi un ka rasta mukhtalif hai kameez bohat kharab tane banay se bani hai doosri theek thi lekin iss ke bazoo mein sorakh hai aib daar tukraa	Positive	['tasweer', 'mukhtalif', 'kameez', 'tane', 'doosri', 'sorakh', 'aib', 'tukraa']
288	SH069FA039PJONAFAMZ	Ubair Javaid	5656	2019-10-31	4	0	rang bohat achha hai iss ka kaamil bilkul bhi madoom nahi hota hai jis shakhs ke liye mein ny iss ka hukum diya tha woh usay pasand karta tha rang behtareen pehlu tha tane banay naram aur aram da hain garmiyon aur sardiyoon dono mein yeh aasani se pehna ja sakta hai yeh kisi nah kisi terhan ka lekin hamwar mad hay hai miyaar ke lehaz se dono tea shirt yaksaa theen yeh aik bohat achha numeral hai …	Positive	['rang', 'madoom', 'shakhs', 'pasand', 'rang', 'behtareen', 'tane', 'naram', 'aram', 'garmiyon', 'sardiyoon', 'aasani', 'hamwar', 'mad', 'miyaar', 'lehaz', 'tea', 'laazmi', 'tor', 'qeemat', 'silai', 'tane', 'shakhs', 'taraf', 'shikayat', 'andaza']
289	SH069FA039PJONAFAMZ	Danish	1394	2019-05-19	3	0	aik kameez achi hai lekin dosra bohat khurdara hai mein acha nahi hon iss plz se acha mawaad tayyar karoon ga	Positive	['kameez', 'khurdara']
290	SH069FA039PJONAFAMZ	Malik	2987	2017-02-27	3	0	quality achi thi lkin picture may ziyda achi dekhai h	Positive	['quality', 'picture', 'ziyda']
291	SH069FA039PJONAFAMZ	Kashif Hussain	2598	2018-12-23	4	0	miyaar acha tha sab kuch fitting size aur website par hi design ke ain mutabiq tha baghair kisi takheer ke usay bar waqat pouncha diya gaya mujhe pasand hai ke numeral mere liye bhi munasib hai rang roshan thay aur yeh kisi taaza tukre ki terhan lagta tha	Positive	['miyaar', 'fitting', 'size', 'website', 'design', 'baghair', 'takheer', 'waqat', 'pasand', 'munasib', 'rang', 'roshan', 'taaza', 'tukre']
292	SH069FA039PJONAFAMZ	Farhan	1704	2017-05-31	4	0	shirt achi lag rhi h aur extra large size hai	Positive	['large', 'size']
293	SH069FA039PJONAFAMZ	Shahbaz	5020	2018-05-19	5	0	achi quality hai comfortable hai easy h usay may b	Positive	['quality', 'comfortable', 'easy']
294	SU455FA18NJ18NAFAMZ	Rehman	4458	2019-02-15	5	0	awsome item hi yar usay ki mane achi watch	Positive	['awsome', 'watch']
295	SU455FA18NJ18NAFAMZ	arsamo	6353	2017-10-24	5	0	lakin kaam keemt may bacho k lya	Positive	['keemt']
296	SU455FA18NJ18NAFAMZ	Farhan	1704	2019-06-01	1	0	may iss p time ny set kar pa rha yha time set karo tu wo bar bar hi show krwta hai	Positive	['time', 'set', 'time', 'set', 'show']
297	SU455FA18NJ18NAFAMZ	Waseem	5914	2017-04-17	1	0	yha galat rating h ya rating wali chez nai hai	Neutral	['galat', 'rating', 'rating']
298	SU455FA18NJ18NAFAMZ	Azaan	1158	2017-09-07	5	0	bhot acha bhot acha	Positive	[]
299	SU455FA18NJ18NAFAMZ	AKF	76	2019-03-27	5	0	acha hai lakin time click karni k baad nazar aata hai	Neutral	['time', 'click']
300	SU455FA18NJ18NAFAMZ	Online With Sherkhan	4144	2019-03-05	5	0	ya acha hai kaam keemat may h product	Positive	['keemat']
301	MA305FA1KY528NAFAMZ	Ahsan Mateen	500	2016-05-01	5	1	qeemat ke hawale se yeh qmizin bohat achi hain faraham kardah rangon mein koi farq nahi tha aur tamam ka tane banay bhi aik jaisay thay rang bohat achay hain nah tu kapron ki dhulai se khoon beh raha hai size bhi durust tha aur mujhe bilkul foot karta tha mein iss miyaar se bohat mutmaen hon	Negative	['qeemat', 'hawale', 'qmizin', 'faraham', 'tamam', 'tane', 'rang', 'kapron', 'dhulai', 'khoon', 'size', 'durust', 'miyaar']
302	MA305FA1KY528NAFAMZ	Faizan Faizi	1665	2018-02-13	4	1	mein ne haal hi mein un ka order diya tha aur mein un ke miyaar se vaqata satisfied mutmaen tha maadi ka miyaar iss naram nahi tha lekin un ko dhoney ke baad bhi yeh azad raha un par silai achh was tha lekin mein yeh tajweez kere ga ke woh iss mein aik double xl size mota arif karwaen woh sirf khadshaat thay jo mujhe iss numeral ke sath hain lekin mein vaqata these iss terhan karta tha	Negative	['order', 'miyaar', 'vaqata', 'satisfied', 'miyaar', 'naram', 'dhoney', 'silai', 'tajweez', 'size', 'mota', 'vaqata']
303	MA305FA1KY528NAFAMZ	Mian Talha Shahid	3139	2016-08-03	4	1	yeh shirts bohat achi hain bohat saada lekin rang bohat achay hain qeemat ke mutabiq rang ka miyaar bhi kaamil hai kapray dhoney ke baad nahi skrhte hain aur garmiyon mein idhar idhar pehnana ziyada tarjeeh hai tamam shirts ka samaan aik dosray se mukhtalif tha iss mein size mein bhi thora sa farq tha	Positive	['shirts', 'saada', 'rang', 'qeemat', 'rang', 'miyaar', 'kapray', 'dhoney', 'garmiyon', 'pehnana', 'tamam', 'shirts', 'samaan', 'dosray', 'mukhtalif', 'size']
304	MA305FA1KY528NAFAMZ	Faizan Anjum	1663	2017-12-27	5	1	mein ne haal hi mein yeh order diya tha aur waqai mein waqai khush tha kyunkay wahan pouncha sab kuch kaamil tha mein ne jo hukum diya tha woh mil gaya woh bilkul isi terhan ki wazahat mein thay un shirts ka miyaar vaqata achchca tha mawaad naram tha aur fitting bohat umdah thi silai bhi achi thi mein ne yeh bohat ziyada dhoya hai aur mujhe miyaar ke sath kisi maslay ka saamna nahi karna para	Positive	['order', 'khush', 'wahan', 'wazahat', 'shirts', 'miyaar', 'vaqata', 'naram', 'fitting', 'umdah', 'silai', 'miyaar', 'maslay', 'saamna']
305	MA305FA1KY528NAFAMZ	Mustufa Dilpazir	3814	2020-01-28	4	0	mein daraz ka aksar gahak hon mujhe waqai mein yeh tea shirts pasand ayen woh bohat achay miyaar ke thay aur un ki cheeze unhein ziyada aram da bana rahi hain lekin mein neh rangon mein se rangon ko pasand nahi kya jo neelay aur surkh thay dosaron ki achh ie baat hai mein un ko bhi ki terhan p_hnta hon iss qeemat mein mujhe yeh kehna zurori hai ke yeh tea shirts bohat achi hain	Positive	['aksar', 'tea', 'shirts', 'pasand', 'miyaar', 'cheeze', 'aram', 'neh', 'pasand', 'neelay', 'dosaron', 'phnta', 'qeemat', 'zurori', 'tea', 'shirts']
306	MA305FA1KY528NAFAMZ	Mrs	3330	2019-12-23	5	0	ya asan h istemaal may keemat b kaam hai aur saaf b hai	Neutral	['asan', 'keemat', 'saaf']
307	MA305FA1KY528NAFAMZ	Karan Kumar	2584	2019-09-21	4	1	miyaar ke tor par behtareen masnoaat qeematon ke mutabiq hai brandz ke muqablay mein size mein chhota sa farq	Positive	['miyaar', 'tor', 'behtareen', 'masnoaat', 'qeematon', 'brandz', 'size', 'chhota']
308	GE310FA1HFXXGNAFAMZ	Muhammad Taif Khan	3647	2016-07-20	4	1	yeh bend waqai mein acha hai aur mein iss ki faalit se kaafi mutmaen hon yeh mere phone se aasani se jarr gaya aur din bhar kalayi par pahannay mein bhi aasani hai battery ke waqt ki nigrani nahi ki hai lekin mein iss se mutmaen hon	Positive	['bend', 'aasani', 'din', 'bhar', 'kalayi', 'pahannay', 'aasani', 'battery', 'waqt', 'nigrani']
309	GE310FA1HFXXGNAFAMZ	Farhan	1704	2017-01-27	5	0	zabardast numeral behtareen cheez mein se aik battery hai iss mein hafta aur bhi ziyada waqt hai	Positive	['zabardast', 'behtareen', 'battery', 'hafta', 'waqt']
310	GE310FA1HFXXGNAFAMZ	Ammar Ashraf	764	2019-12-29	4	0	mein neh aik mah qabal iss ki farahmi ki hai aur iss ke sath mera tajurbah bohat achcha raha hai iss ka miyaar bohat achcha tha mein neh iss ke calorie meter ko qatee tor par istemaal nahi kya aur mujhe nahi maloom ke aya iss ka durust hai ya nahi nahi balkay iss qadam aur faaslay ki ginti jo yeh faraham karti hai woh bohat achi hai aur iss ki taskeen hai aur yeh poooray charge ke baad taqreeban …	Positive	['neh', 'qabal', 'farahmi', 'tajurbah', 'miyaar', 'neh', 'calorie', 'meter', 'tor', 'maloom', 'durust', 'ginti', 'faraham', 'poooray', 'charge', 'taqreeban', 'din']
311	AY536FA11G0ZMNAFAMZ	rashida	7067	2017-06-16	5	0	wo humy achi quality deth hai aur size b bilkul sai hai	Positive	['quality', 'size']
312	GE310FA1HFXXGNAFAMZ	Abdullah memon	257	2019-06-03	4	0	smart fitness band aik bohat hi tasalii bakhash numeral tha meri sirf mamooli tashweesh yeh hai ke jab yeh rabita hota hai tu phone se khud se munqita hojata hai warna tajurbah herat angaiz raha hai aur sab se achi baat iss ki battery ka waqt hai jo vaqata really taweel arsa taq chalta hai aur mein aasani se istemaal karta hon yeh mere tajarbaat mein mazeed izafah karne walay iqdamaat ko ginna hai	Positive	['smart', 'fitness', 'band', 'tasalii', 'bakhash', 'mamooli', 'tashweesh', 'rabita', 'tajurbah', 'herat', 'angaiz', 'battery', 'waqt', 'vaqata', 'taweel', 'chalta', 'aasani', 'izafah', 'iqdamaat']
313	GE310FA1HFXXGNAFAMZ	Mian Awais	3130	2017-02-18	3	0	yeh smart fitness baind mere liye bohat ost tha kyunkay mujhe iss se thori ziyada tawaquaat theen yeh qeemat ke lehaz se achcha tha lekin phir bhi mujhe behtar karkardagi ki tawaqqa thi kyunkay iss ilaqay mein kuch mamlaat hain mera bara istemaal qadmon ki ginti ke liye hai jabkay chalna aur yeh durust nahi hai yeh gharri mein mukhtalif aur phone mein mukhtalif dekhata hai aur farq kaafi hadd taq…	Positive	['smart', 'fitness', 'baind', 'thori', 'tawaquaat', 'qeemat', 'lehaz', 'tawaqqa', 'bara', 'ginti', 'jabkay', 'durust', 'mukhtalif', 'mukhtalif', 'dekhata', 'calls', 'paighamaat', 'social', 'media', 'majmoi', 'tajurbah']
314	AY536FA11G0ZMNAFAMZ	saba	7107	2020-01-09	5	0	acha size h kapra b acha hai	Positive	['size', 'kapra']
315	AY536FA11G0ZMNAFAMZ	anas	6322	2016-09-01	5	0	acha size h kapra b acha hai aur delivery time b bhot sai hai	Positive	['size', 'kapra', 'time']
316	AY536FA11G0ZMNAFAMZ	noor faizan	7008	2017-11-11	5	0	bhot achi quality may bhot kush ho sir	Positive	['quality']
317	SH069FA039PJONAFAMZ	umer awan	7359	2016-09-20	3	0	mera tajurbah iss kharidari se sirf aadha aaccha tha kyunkay aik tea shirt miyaar aur fitting mein bilkul theek thi lekin aik miyaar mein itna aaccha nahi tha kyunkay iss ka caller miyaar mein bilkul kacha aur vaqata poor naaqis tha aur usay pahannay mein aram da aur pursukoon tajurbah faraham nahi kya gaya tha thora mayoos kin tha	Negative	['tajurbah', 'kharidari', 'aadha', 'tea', 'miyaar', 'fitting', 'miyaar', 'caller', 'miyaar', 'kacha', 'vaqata', 'naaqis', 'pahannay', 'aram', 'pursukoon', 'tajurbah', 'faraham', 'mayoos']
318	SH069FA039PJONAFAMZ	Ahsan Hanid	494	2019-11-07	5	0	iss pack mein dono tea shirts bilkul kaamil theen aur bilkul isi terhan jaisay unhein tasweer mein dekhaya gaya tha mujhe sirf iss cheez ki pasand thi jis ki wajah se yeh pehnana bhi bohat aram da tha size aur fitting bhi kaamil thi	Positive	['pack', 'tea', 'shirts', 'tasweer', 'pasand', 'wajah', 'pehnana', 'aram', 'size', 'fitting']
319	SH069FA039PJONAFAMZ	Rana	4381	2016-09-18	1	0	jab mein nay daraz ke sath intehai nakhush tajurbah kya tu bohat kharab quality shirts mein bohat saaray kharab fabric ke sorakh hotay thay	Negative	['intehai', 'tajurbah', 'quality', 'shirts', 'fabric', 'sorakh']
320	SH069FA039PJONAFAMZ	Zeeshan	6135	2017-06-20	5	0	aaj ke din teesri october ko qmizin payen shirts achay miyaar ke hain aur meri tawaqqa taq aur daraz ka shukriya ke iss mein takheer bhi nahi hui aur nah hi mere paas size ka koi masla hai aur nah hi koi maadi masla hai agar mujhe bar waqat itna aaccha mawaad aur tarseel mil jaye tu yaqeenan mazeed order day rahay hon ge	Negative	['din', 'qmizin', 'shirts', 'miyaar', 'tawaqqa', 'takheer', 'size', 'masla', 'masla', 'waqat', 'order', 'day']
321	SH069FA039PJONAFAMZ	ShEikh	4974	2016-07-14	5	0	achi quality h may satisfied ho	Positive	['quality', 'satisfied']
322	SH069FA039PJONAFAMZ	New Guy	4025	2016-08-03	4	0	mujhe yeh shirts kisi dost ke l get haasil karne ki zaroorat thi aur yeh mera daraz dot pi ke ke sath pehla tajurbah tha mujhe yeh kehte hue bohat khushi hoti hai ke tajurbah bohat achchhaa tha lekin tarseel ka waqt itna khush kin nahi tha jab pouncha tu yeh v gardan wali qmizin jis terhan mein neh ki tasweeron ki badolat iss ka tasawwur kya tha du ka pack siyah gardan ke kaam ke sath bhuri rang …	Positive	['shirts', 'haasil', 'zaroorat', 'dot', 'pehla', 'tajurbah', 'khushi', 'tajurbah', 'waqt', 'khush', 'qmizin', 'neh', 'tasweeron', 'tasawwur', 'pack', 'siyah', 'bhuri', 'rang', 'herat', 'angaiz', 'silai', 'miyaar', 'size', 'neh', 'order', 'ghalat', 'neh', 'pack', 'tohfay', 'day', 'neh', 'shikayat', 'khushi', 'bananay', 'kharidari', 'tajurbah', 'umdah', 'umdah', 'miyaar', 'masnoaat', 'mustaqbil', '…
323	SH069FA039PJONAFAMZ	Muhammad Faisal	3550	2019-10-17	5	0	mein nay yeh qmizin aram se pahannay ke l bought khareedi hain aur un dono ko pasand kya hai tane banay aram da aur saans lainay ke qabil hain jasamat ka size mere liye bilkul durust hai aur gardan ke button ka andaaz bohat achha lagta hai	Positive	['qmizin', 'aram', 'pahannay', 'khareedi', 'pasand', 'tane', 'aram', 'qabil', 'jasamat', 'size', 'durust', 'button', 'andaaz']
324	SU455FA18NJ18NAFAMZ	Sheeraz	5162	2017-09-02	2	0	time ksy set karna hai jb time set karo hi show krwata hai ab may kya karo	Neutral	['time', 'set', 'time', 'set', 'show']
325	SU455FA18NJ18NAFAMZ	Abdul	164	2016-11-23	5	0	may ny wtch liay hai inn ka product bhot acha hai	Neutral	['wtch']
326	SU455FA18NJ18NAFAMZ	Shahzad	5068	2018-03-27	5	0	mujhy product pasnd hai wazan kaam hai comfortable b hai aur wakt p mil jta hai	Positive	['wazan', 'comfortable', 'wakt']
327	SU455FA18NJ18NAFAMZ	Hamza	2020	2017-05-30	5	1	achi watch mein ne iss ko order kya black ail dd rang surkh hai bohat achi lag rahi pitay pitay	Positive	['watch', 'order', 'black', 'rang', 'pitay', 'pitay']
328	SU455FA18NJ18NAFAMZ	Muhammad Abrar	3490	2016-07-28	1	0	woh fi ghari ke hisaab se ishtihar day rahay hain mein nai ghariyaan qeemat dekhnay ke baad order kya aur unhon nai parcel ki qeemat ke sath bheja un ki qeemat par yaqeen nah karen	Negative	['hisaab', 'ishtihar', 'day', 'ghariyaan', 'qeemat', 'order', 'parcel', 'qeemat', 'qeemat', 'yaqeen']
329	SU455FA18NJ18NAFAMZ	Saima	4739	2016-12-21	3	1	time set nai ho rha	Neutral	['time', 'set']
330	SA609FA0BYZXWNAFAMZ	Sami	4847	2016-04-17	3	0	ghari waqai achi aur qabil qeemat hai lekin tarseel ko mamool se ziyada waqt laga	Positive	['qabil', 'qeemat', 'waqt']
331	SA609FA0BYZXWNAFAMZ	Fahad	1603	2016-10-21	5	0	bilkul sai chez hai aur looks b achi h bhot	Positive	['looks']
332	SA609FA0BYZXWNAFAMZ	Khan	2636	2019-04-21	1	0	aap ko yeh gharri kaam se kaam din mein kabhi nahi mil paye gi agar aap intzaar kar saktay ho ya kisi dukaan se khareedain tu usay order karen	Negative	['din', 'intzaar', 'dukaan', 'order']
333	SA609FA0BYZXWNAFAMZ	MR.BILAL	2885	2018-03-26	5	0	bhot achi product h sb liay iss kp good	Positive	['good']
334	SA609FA0BYZXWNAFAMZ	Mashhood	3055	2017-11-22	5	0	ya orignal sumsung aur kaam b sai kar rha hai	Neutral	['orignal']
335	MA305FA1KY528NAFAMZ	adeel hussain	6255	2019-10-01	4	1	mein poooray aetmaad ke sath yeh nahi keh sakta ke mere paison ko istemaal kya jata hai mausam ke liye meri almaari mein kaamil joor yeh aram se pahannay ke liye saaf suthra aur misali libaas silai hai mujhe waqai rang ki hadd pasand thi un sab ko kitne achay aur pakeeza hain kisi bhi shirt ne dhoney ke baad apna rang aur shakal nahi khoya yeh mukammal tor par sukarnay se pak hai jis ka size aur …	Positive	['poooray', 'aetmaad', 'paison', 'mausam', 'aram', 'pahannay', 'saaf', 'misali', 'libaas', 'silai', 'rang', 'pasand', 'dhoney', 'rang', 'shakal', 'mukammal', 'tor', 'sukarnay', 'size', 'fitting', 'khush', 'khushi', '']
336	MA305FA1KY528NAFAMZ	Khan	2636	2017-09-05	1	0	aik shirt khrb hai aur blue wali may whole hai	Neutral	['khrb', 'blue']
337	MA305FA1KY528NAFAMZ	Jawad Bajwa	2466	2019-10-08	5	1	theek hai iss package ke sath mera tajurbah bohat achcha raha hai paish kash aik bohat hi asan qeemat par tea shirt thi jis ki wajah se mein ne fori tor par iss ka order diya tha aur mein iss se bohat khush hon tea shirts ka miyaar bohat achcha tha har tea shirt iss package mein bohat achcha tha mad really vaqata soft naram tha aur achay miyaar ka tha mere khayal mein fitting aur silai achh was t…	Positive	['package', 'tajurbah', 'asan', 'qeemat', 'tea', 'wajah', 'tor', 'order', 'khush', 'tea', 'shirts', 'miyaar', 'tea', 'package', 'mad', 'vaqata', 'soft', 'naram', 'miyaar', 'khayal', 'fitting', 'silai', 'munasib', 'tareeqay', 'shirts', 'vaqata', 'miyaar', 'rang', 'khatam']
338	MA305FA1KY528NAFAMZ	Saad Amir	4622	2018-08-07	5	1	pack waqai mein bohat aaccha hai aur rang bohat mutharrak aur purkashish hain fitting waqai mein achi thi isi terhan size bhi durust tha tane banay ka miyaar bhi aaccha aur naram tha aur garmiyon mein pahannay mein arram da mehsoos hota tha yeh bohat achi baat hai aik achi qeemat par shirts jo pesey ki qader ki paish kash karti hain aur arram da aur pursukoon libaas ke tor par bohat umdah hon gi	Positive	['pack', 'rang', 'mutharrak', 'purkashish', 'fitting', 'size', 'durust', 'tane', 'miyaar', 'naram', 'garmiyon', 'pahannay', 'mehsoos', 'qeemat', 'shirts', 'pesey', 'qader', 'pursukoon', 'libaas', 'tor', 'umdah']
339	MA305FA1KY528NAFAMZ	Muhammad Hassan Dajana	3566	2017-12-17	4	1	pack kaafi achchca hai bas du hi tea shirts ka maamla un ki shakal se thora sa bahar aur dheelay lagta tha warna yeh waqai achay miyaar ke mitril tea shirts theen jo usay pahannay ke douran naram aur aram da mehsoos hoti theen lehaza koi baat nahi rang bohat mutharrak thay aur mein neh inhen jeans pehnay hue bohat achchca mehsoos kya tha	Negative	['pack', 'tea', 'shirts', 'shakal', 'dheelay', 'miyaar', 'tea', 'shirts', 'pahannay', 'douran', 'naram', 'aram', 'mehsoos', 'rang', 'mutharrak', 'neh', 'jeans', 'pehnay', 'mehsoos']
340	MA305FA1KY528NAFAMZ	Hassan Malik	2124	2018-08-27	3	1	achcha yeh aik khofnaak tajurbah tha kal shirts theen aur un shirts mein se sirf qmisin achay miyaar ki theen un ka tane banay ya mawaad achh quality miyaar ka tha aur un ki silai bhi achi thi lekin baqi shirts qabil reham they un dinon ka miyaar achcha nahi tha aur pehlay dinon mein un mein se phaar para tha size aur fitting un tamam shirts se mukhtalif thi agarchay mein neh aik size ka order di…	Negative	['khofnaak', 'tajurbah', 'shirts', 'shirts', 'qmisin', 'miyaar', 'tane', 'quality', 'miyaar', 'silai', 'shirts', 'qabil', 'reham', 'dinon', 'miyaar', 'pehlay', 'dinon', 'size', 'fitting', 'tamam', 'shirts', 'mukhtalif', 'neh', 'size', 'order', 'maloom', 'neh', 'naaqis', 'tukre', 'tukre', 'masail']
341	MA305FA1KY528NAFAMZ	Muhammad Noman Asad	3608	2016-04-06	5	1	tea shirts ka herat angaiz packet aur rang roshan hain aur waqai thanda nazar araha hai size mere liye theek tha aur tane banay ka miyaar bhi achcha tha aur tea shirts bhi it lag rahi thi yakeeni tor par qeemat ke liye yeh aik bohat bara maamla hai lehaza yakeeni tor par garmiyon mein usay pahannay ke l these yeh bhi achay aur aram da aur pursukoon thay aur jeans par bhi khoob nazar atay hain	Positive	['tea', 'shirts', 'herat', 'angaiz', 'packet', 'rang', 'roshan', 'thanda', 'size', 'tane', 'miyaar', 'tea', 'shirts', 'tor', 'qeemat', 'bara', 'tor', 'garmiyon', 'pahannay', 'aram', 'pursukoon', 'jeans']
342	MA305FA1KY528NAFAMZ	Adil Aslam	334	2016-02-23	2	0	mein ne un tea shirts ka order diya tha aur mein un se vaqata satisfied mutmaen hon mujhe waqai mein v gardan pehnana pasand hai aur un shirts ki waqai mein achi darjah bandi thi lehaza mein ne un ka hukum diya achi terhan se mujhe ziyada napaid nahi hona para un shirts ka miyaar bohat mohazab tha lekin du un shirts mein se aik ke sath masail they aik shirt ka rang dhoney ke baad khatam ho gaya t…	Negative	['tea', 'shirts', 'order', 'vaqata', 'satisfied', 'pehnana', 'pasand', 'shirts', 'bandi', 'shirts', 'miyaar', 'shirts', 'masail', 'rang', 'dhoney', 'khatam', 'doosri', 'kameez', 'dhoney', 'minute', 'raishay', 'shirts', 'dosray', 'fitting', 'size', 'fitting', 'masla']
343	MA305FA1KY528NAFAMZ	Mehar	3092	2019-11-19	5	1	bhot acha product h may zaroor logo ko kahp ga k ya chez liay aap bhi	Positive	['logo']
344	GE310FA1HFXXGNAFAMZ	Edntech	1512	2019-04-06	4	1	iss qeemat ke liye yeh smart foot baind hona zurori hai sirf aik hi cheez jo dil ki dharkan monitor nahi hai lekin woh iss se mehngi padtee miyaar vaqata good achh aa hai aur numeral paseenay ka saboot hai taakay mein kaam karte waqt aasani se istemaal karoon	Positive	['qeemat', 'smart', 'baind', 'zurori', 'dil', 'monitor', 'mehngi', 'miyaar', 'vaqata', 'good', 'paseenay', 'saboot', 'waqt', 'aasani']
345	GE310FA1HFXXGNAFAMZ	Hasan Akmal	2087	2017-04-07	5	1	alhmd lillah baind theek kaam kar raha hai yeh bilkul kaamil pahannay mein bhi aasani hai meri kalayi par koi nishaan nahi chhorta hai agarchay mein usay pehnta rehta hon	Positive	['baind', 'pahannay', 'aasani', 'kalayi', 'nishaan']
346	GE310FA1HFXXGNAFAMZ	Haad	1936	2016-10-21	4	1	mujhe iss gharri ke baray mein waqai mein kuch pasand karna hai ke woh mujhe har cheez sabhi ke baray mein mutala karta rehta hai meri poori din ki sargarmi par nazar rakhta hai lekin iss ki battery	Negative	['baray', 'pasand', 'baray', 'din', 'battery']
347	GE310FA1HFXXGNAFAMZ	Noor Mustafa	4080	2020-01-17	5	1	mein ny iss ka hukum diya tha kyunkay mein ny daraz ke baray mein bohat saaray jaizay dekhe hain jo misbet hain aur mein hamesha un jaisay jadeed alaat ki talaash mein rehta hon mein thora sa mayoos hon kyunkay mere phone s par ularam kaam nahi kar raha hai mein ny har mumkin koshish ki hai majmoi tor par masnoaat ki tamam khususiyaat bohat achi terhan se kaam kar rahi hain aur taamer shuda miyaa…	Positive	['baray', 'jadeed', 'talaash', 'mayoos', 'ularam', 'koshish', 'majmoi', 'tor', 'masnoaat', 'tamam', 'taamer', 'miyaar', 'cheeni', 'version', 'patla', 'patla', 'design', 'sifarish']
348	GE310FA1HFXXGNAFAMZ	Old user of daraz	4124	2016-11-06	1	0	yeh gandagi nah khareedain iss ke qabil nahi hai mere aala kehkashan s kinare ke sath mutabqat nahi rakhtay unhon neh usay wapas nahi kya aur usay wapas nahi bheja khud baichnay walay ke jaizay mein jaali tabsaray dil ki sharah meter nahi hai ghalat sensor nahi hain sirf aik ghatiya	Negative	['gandagi', 'qabil', 'kehkashan', 'kinare', 'mutabqat', 'neh', 'wapas', 'wapas', 'baichnay', 'jaali', 'dil', 'meter', 'ghalat', 'sensor']
349	GE310FA1HFXXGNAFAMZ	Zaki Mahmood	6089	2019-11-30	5	1	achi tarha fit howa wazan may b kaam haii aur bttery ti ming b achi hi	Positive	['fit', 'wazan', 'bttery']
350	GE310FA1HFXXGNAFAMZ	Waqar	5876	2017-11-11	2	0	watch theek kaam kar rahi hai lekin yeh mere phone se marboot nahi hai jahan himayat haasil ki jaye	Negative	['watch', 'marboot', 'haasil']
351	GE310FA1HFXXGNAFAMZ	Sikandar Aziz	5261	2018-05-03	4	1	mein ne usay mustaqil tor par pehan rakha hai aur iss mein bunyadi tor par woh tamam cheeze hain jin ka zikar ki wazahat mein kya gaya hai iss ki quality ke hawale se mere taraf se koi masla nahi hai miyaar achha mehsoos hota hai aur band khud bhi achha lagta hai yeh waqai pani hai muzahim mein ne yeh pehna sun hwa hai jabkay mein ne iss ke sath hi shower kya tha aur ab bhi kaam kar raha hai meri…	Neutral	['mustaqil', 'tor', 'pehan', 'tor', 'tamam', 'cheeze', 'wazahat', 'quality', 'hawale', 'taraf', 'masla', 'miyaar', 'mehsoos', 'band', 'jabkay', 'shower', 'calorie', 'meter', 'durust', 'battery', 'waqt', 'tajurbah', 'imandaar']
352	AY536FA11G0ZMNAFAMZ	rehan	7075	2018-08-05	5	0	aybeez aik h online ki duniya may aur ya bhort acha sell kar rha hai	Positive	['aybeez', 'online', 'sell']
353	AY536FA11G0ZMNAFAMZ	Tahir	5498	2018-04-18	5	0	may ya ya aik khareeda ya bhot acha hai tareef k kabil	Positive	['tareef']
354	AY536FA11G0ZMNAFAMZ	Mehwish	3116	2018-06-15	5	0	acha kapra hau jsa pic may tha shukriya aybeez	Positive	['kapra', 'pic', 'aybeez']
355	AY536FA11G0ZMNAFAMZ	asma	6375	2019-10-27	5	0	aybeez bhot acha hai online duniya may	Positive	['aybeez', 'online']
356	AY536FA11G0ZMNAFAMZ	Shahzaib	5074	2020-01-10	5	0	achi qulity hai kaam keemat may	Positive	['qulity', 'keemat']
357	AY536FA11G0ZMNAFAMZ	Rehan	4448	2017-12-19	5	0	acha kaprra hai sir may kush ho ya buy kar k apki shop sy	Neutral	['buy']
358	SU455FA18NJ18NAFAMZ	Engineer Najeeb	1548	2020-01-25	2	0	ie sirf din kaam karta h mry lya	Neutral	['din']
359	SU455FA18NJ18NAFAMZ	M. Naeem	2808	2017-04-17	5	0	achi hi bhot ziyda iss keemat may	Positive	['ziyda', 'keemat']
360	SU455FA18NJ18NAFAMZ	Tayyab	5586	2018-05-17	5	0	bhot jaldi pounch jta hai quality avhi h aur ya sports k wakt usay karni k lya hai	Negative	['jaldi', 'quality', 'sports', 'wakt']
361	SU455FA18NJ18NAFAMZ	Daniyal	1408	2018-12-08	1	0	ya wur s ki watch same tarha ki hai	Positive	['watch']
362	SU455FA18NJ18NAFAMZ	Naurahan Azhar	3975	2018-10-05	5	0	umdah packing aur haalat mein gharri mousool hui hai jo sahih tareeqay se kaam kar rahi hai aur bohat achi lag rahi hai iss qeemat mein itni umdah gharri aur din mein mousool hui bohat khush	Positive	['umdah', 'packing', 'haalat', 'mousool', 'tareeqay', 'qeemat', 'umdah', 'din', 'mousool', 'khush']
363	MA305FA1KY528NAFAMZ	Smr	5280	2017-10-31	5	1	achi quality ki shirt hai shukriya daraz	Positive	['quality']
364	MA305FA1KY528NAFAMZ	Ali Hassan	607	2017-02-05	4	1	mein hamesha shirts ko online order karta hon kyunkay mujhe hamesha daraz se cheeze millti hain aur un shirts ka miyaar vaqata good achh shirt hai un shirt ke baray mein sab se achi baat un ki mukhtalif qisam ki hoti hai woh mukhtalif rangon mein atay hain aur woh bhi gardan ban jatay hain yeh shirts aram da aur pursukoon hain aur silai achh aa hai mein nay unhein aik du baar dhoya hai aur unhein…	Positive	['shirts', 'online', 'order', 'cheeze', 'shirts', 'miyaar', 'vaqata', 'good', 'baray', 'mukhtalif', 'qisam', 'mukhtalif', 'ban', 'shirts', 'aram', 'pursukoon', 'silai', 'tabdeeli']
365	MA305FA1KY528NAFAMZ	ZealFied	6123	2016-05-20	4	1	qmizin apni qeemat ke liye uch are hain miyaar acha hai dekhe ga ke un ko dhoney ke baad kaisa chalta hai	Positive	['qmizin', 'qeemat', 'miyaar', 'dhoney', 'chalta']
366	MA305FA1KY528NAFAMZ	Nomi	4074	2016-12-19	4	1	may ny xil mangwaya tha aur mujhy l mila hai	Negative	[]
367	MA305FA1KY528NAFAMZ	Hamza	2020	2019-08-27	4	1	qaulity shirts ki achi hai lakin aik shirt ka color sai nai hai	Positive	['qaulity', 'shirts', 'color']
368	MA305FA1KY528NAFAMZ	Ahmad raza	447	2018-12-12	5	1	mujhe tamam tea shirts pasand hain lekin mein aap ko yeh batana chahta tha ke tamam tea shirts ke size mukhtalif hain jis se kuch mujh par foot nahi hain	Negative	['tamam', 'tea', 'shirts', 'pasand', 'chahta', 'tamam', 'tea', 'shirts', 'size', 'mukhtalif']
369	GE310FA1HFXXGNAFAMZ	Dr Danish Ebad	1459	2018-05-12	3	0	pehlay yeh ginti ke iqdamaat aur it tila aat mousool karne ke l aa achchhaa hai agarchay bohat saaray masail hain bohat saaray ghalat fehmiya hain iss mein kardik monitor ya dil ki sharah ki nigrani nahi hai kuch log iss par tabsarah kar rahay thay ke dil ki sharah ki nigrani kitni achi thi woh jhutay they bachcho dosra yeh khud se aik baar phir jeeti foot app se munqita hojata hai aur phir zahir…	Negative	['pehlay', 'ginti', 'iqdamaat', 'mousool', 'masail', 'ghalat', 'monitor', 'dil', 'nigrani', 'log', 'tabsarah', 'dil', 'nigrani', 'kitni', 'zahir', 'mousool']
370	GE310FA1HFXXGNAFAMZ	Faizan	1659	2017-09-06	5	0	ya acha product h may dobara lo ga daraz sy	Positive	[]
371	GE310FA1HFXXGNAFAMZ	Fakhar rehman	1678	2016-11-28	3	0	kya ya kaam karta hai ios p	Neutral	['ios']
372	GE310FA1HFXXGNAFAMZ	Baber Wassim	1209	2017-02-02	4	0	masha allah yeh bohat aaccha hai battery ka waqt herat angaiz hai din aur iss se bhi ziyada waqt taq chalta hai mein ne usay baghair kisi dushwari ke apne phone ke sath mutabqat pazeer kardiya matan ki tarteeb itna dilkash hai iss siyah chico bind par it tila aat milna bohat aaccha hai iss ke atlaqat thora sa sust hain kyun ke mein usay nahi day raha hon kyunkay iss mein behtari ki gunjaish mojoo…	Positive	['allah', 'battery', 'waqt', 'herat', 'angaiz', 'din', 'waqt', 'chalta', 'baghair', 'mutabqat', 'kardiya', 'tarteeb', 'dilkash', 'siyah', 'bind', 'sust', 'day', 'behtari', 'gunjaish', 'mojood', 'tor', 'bind']
373	GE310FA1HFXXGNAFAMZ	Arsslan Shaikh	963	2019-05-19	5	0	agar aap apple watch ke muthammil nahi ho saktay hain tu yeh haasil karne ke l yeh behtareen ghari hai agar aap sehat se aagah shakhs ho bohat hi hamwar sarif antrfis asan lekin mazboot mein iss ki sifarish zaroor karoon ga	Positive	['watch', 'haasil', 'behtareen', 'sehat', 'shakhs', 'hamwar', 'asan', 'sifarish']
374	GE310FA1HFXXGNAFAMZ	Huzaifa	2217	2016-07-30	4	1	iss gadget mein dil ki sharah maapnay wala sensor hai ya nahi	Negative	['gadget', 'dil', 'maapnay', 'sensor']
375	GE310FA1HFXXGNAFAMZ	Shahab Noor	5013	2016-10-14	5	1	yeh taakay ka aisa herat angaiz tukraa hai waqt zahir karne ke ilawa zahir hai ke iss mein mutadid deegar fitness khususiyaat bhi hain jaisay jalti hui calorie ginti hai aur alarm aur caller ki ittila ke liye bhi istemaal ki ja sakti hai	Positive	['herat', 'angaiz', 'tukraa', 'waqt', 'zahir', 'zahir', 'mutadid', 'fitness', 'calorie', 'ginti', 'alarm', 'caller']
376	BA589FA0P0PDCNAFAMZ	Mudassir	3470	2018-05-06	5	0	acha quality product mila hai may acha feel kar rha ho	Positive	['quality', 'feel']
377	AY536FA11G0ZMNAFAMZ	sajid	7130	2018-02-15	5	0	aybeez acha hai quality aur products may	Positive	['aybeez', 'quality', 'products']
378	AY536FA11G0ZMNAFAMZ	Rimsha	4481	2017-08-13	5	0	acha fabrics hai aur quality may aybeez sb sy acha hai shukriya	Positive	['fabrics', 'quality', 'aybeez']
379	AY536FA11G0ZMNAFAMZ	Uzair	5782	2016-05-19	5	0	bhot achi chez hai iss tarha ka phely nai mila	Positive	[]
380	AY536FA11G0ZMNAFAMZ	dani	6465	2017-11-14	5	0	acha acaah hai aybeez team bhot ach kaam kar rhi hai	Positive	['aybeez', 'team']
381	SU455FA18NJ18NAFAMZ	usman	7373	2018-05-18	5	0	mein ne iss khauf ka order diya lekin jab yeh mujhe pouncha tu mein thanda ho gaya kyunkay yeh acha tha aur web par bhi aisa hi tha	Positive	['order', 'thanda', 'web']
382	SU455FA18NJ18NAFAMZ	Muhammad	3482	2018-01-30	5	0	yeh ghari intehai maqool hadd tak heran kin hai yeh mera pehla wahid kharidari ka tajurbah hai aur iss ki daraz par great	Positive	['intehai', 'heran', 'pehla', 'wahid', 'kharidari', 'tajurbah']
383	SU455FA18NJ18NAFAMZ	M.Naeem	2839	2018-05-04	1	0	bhot buri sale ki keemat hai rup ki new h iss may	Neutral	['buri', 'keemat', 'new']
384	SU455FA18NJ18NAFAMZ	Fast	1758	2018-06-01	3	0	may month date aur sec nai set kar pa rha	Neutral	['date', 'set']
385	MA150FA1LNDHANAFAMZ	Ali	589	2017-02-24	5	0	may ny jori shoes maanwaya thi mekaho ga k ya bhot acha hai	Positive	['jori', 'shoes']
386	MA305FA1KY528NAFAMZ	&gt;&gt;&gt;&gt;&gt;&gt;&gt;&gt;www.richspath	1	2017-04-04	3	1	kya aap ke paas paiy _ account hai agar aap apne account mein har din sirf ghantay izafi tor par ghar mein kaam karte ho tu izafi raqam jama kar saktay hain iss site par jayen	Positive	['paiy', 'account', 'account', 'din', 'ghantay', 'izafi', 'tor', 'izafi', 'raqam', 'site']
387	MA305FA1KY528NAFAMZ	No name	4060	2018-08-12	5	0	shirts ki bohat achi quality sirf yeh dekh kar heran reh gaya aur shirts ke packet ki itni kaam qeemat bohat khush shukriya	Positive	['shirts', 'quality', 'heran', 'shirts', 'packet', 'qeemat', 'khush']
388	MA305FA1KY528NAFAMZ	Shahzaib Hassan	5077	2019-12-28	4	1	munasib qeemat mein bohat ziyada qisam ki chezay aur raahat milna mere liye bohat herat angaiz hai yeh saari qmizin saaf saly hui hain aur vaqata soft naram mawaad hai jo mujhe din bhar aram da aur pursukoon rakhta hai yeh rang bhi itnay roshan aur achay miyaar ke hain koi bhi nahi iss mein se khoon bahtay hue	Positive	['munasib', 'qeemat', 'qisam', 'raahat', 'herat', 'angaiz', 'qmizin', 'saaf', 'vaqata', 'soft', 'naram', 'din', 'bhar', 'aram', 'pursukoon', 'rang', 'roshan', 'miyaar', 'khoon']
389	MA305FA1KY528NAFAMZ	Sajid Munawwar	4759	2019-08-12	4	0	mujhe un shirts ke baarey mein jo cheez pasand aa rahi hai woh hai kapray ka miyaar woh motay nahi hain aur yaqeenan tu bohat patli bhi nahi hain aur woh halkay aur hawadaar bhi mehsoos karte hain ab iss se raahat mehsoos hota hai miyaar ki tareef ki hai	Positive	['shirts', 'pasand', 'kapray', 'miyaar', 'motay', 'patli', 'mehsoos', 'raahat', 'mehsoos', 'miyaar', 'tareef', '']
390	MA305FA1KY528NAFAMZ	Mian Muhammad Usman Bashir	3133	2017-08-05	4	1	mujhe lagta hai ke mein ne ke iss pack ko muntakhib karne ke liye aik danish mandana faisla kya hai iss mein se aik aik intahi aram da aur pursukoon kameez hai jo mujhe mil sakta hai aur woh mujhe dhoop mein ziyada garam nahi karte hain tamam shukriya tane banay ki halki pan yeh paanchon rang waqai purkashish hain aur ya tu dhotay waqt un se chotay hain mujhe abhi taq un ke silai ya foot honay se…	Positive	['pack', 'muntakhib', 'aram', 'pursukoon', 'kameez', 'dhoop', 'garam', 'tamam', 'tane', 'halki', 'rang', 'purkashish', 'waqt', 'chotay', 'silai', 'nuqs', 'mehsoos', 'pahannay', 'qmizin', 'androoni', 'libaas', 'miyaar', 'tawaqqa', 'pohanchaya']
391	MA305FA1KY528NAFAMZ	NADEEM ABBAS	3837	2019-04-21	5	0	jab mein un ki qeemat par ghhor karta hon tu yeh tea shirts qabil zikar hain mein ab yeh keh sakta hon ke mein neh yeh qmizin saudey mein utarain kyunkay yeh shirt bohat hi umdah tankay hue hain aur un ke rang vaqata ref tar u tazah hain jab se mein neh un ko haasil kya hai mein neh apne aap ko dhoond liya un mein se har aik mein taqreeban almost har din pehnana woh mere liye uthnay ki terhan sab…	Positive	['qeemat', 'tea', 'shirts', 'qabil', 'neh', 'qmizin', 'umdah', 'tankay', 'rang', 'vaqata', 'tazah', 'neh', 'haasil', 'neh', 'taqreeban', 'din', 'pehnana', 'munasib', 'zindagi', 'libaas', 'phnta', 'saada', 'tea', 'chahta', 'zindagi', 'baghair', 'sukoon', 'dosaron', 'neh']
392	MA305FA1KY528NAFAMZ	Mr. Khan	3312	2016-07-07	5	0	mein ne behtar qmizin talabb nahi ki theen yeh qmizin mausam ke lehaz se bohat umdah aur achi hain mujhe ke miyaar ko halka honay ka khayal nahi hai lekin woh waqai mein mujhe achi terhan se foot kar raha hon aur mein siyah faam mein se sab se ziyada pyar karta hon	Positive	['qmizin', 'talabb', 'qmizin', 'mausam', 'lehaz', 'umdah', 'miyaar', 'halka', 'khayal', 'siyah', 'pyar']
393	MA305FA1KY528NAFAMZ	M. ALI	2792	2017-05-27	3	0	mein ne apne bhai ke liye order diya tha aur agarchay mein ne durust size ka order diya tha lekin woh iss ke liye behtar hai kyunkay yeh iss ke liye sakht hai shirts ke miyaar ko mad e nazar rakhtay hue yeh itminan bakhash hain aur un ki hesiyat se un ki farahmi ki jati hai tasweer daar lekin barah karam apne size chart ko up grade karen	Positive	['bhai', 'order', 'durust', 'size', 'order', 'sakht', 'shirts', 'miyaar', 'mad', 'itminan', 'bakhash', 'farahmi', 'tasweer', 'size', 'chart', 'grade']
394	AY536FA11G0ZMNAFAMZ	liza	6803	2018-06-25	4	0	bhot chee quality h t shirts ki aur fabrics b acha hai shukriya	Positive	['quality', 'shirts', 'fabrics']
395	TS571FA0HG8V8NAFAMZ	Hassan	2115	2017-07-16	2	1	acha nai h size inn ka chot h real sy	Negative	['size', 'real']
396	TS571FA0HG8V8NAFAMZ	Arsalan Musani	935	2017-11-28	1	0	bhot bura experience rha wakt bhot kaam th	Negative	['experience', 'wakt']
397	AY536FA11G0ZMNAFAMZ	Kami	2563	2017-01-15	4	0	ach hi lakin bit color change hai	Positive	['color', 'change']
398	AY536FA11G0ZMNAFAMZ	Kiree	2693	2019-03-24	5	0	may ny ya aik khareeda hai ur ya bhot acha hai	Positive	[]
399	AY536FA11G0ZMNAFAMZ	sohail	7270	2019-02-12	5	0	achi service h aybeez	Positive	['aybeez']
400	AY536FA11G0ZMNAFAMZ	Rehan	4448	2018-06-19	5	0	acha fabrics hai jsa may ny socha tha	Positive	['fabrics']
401	TS571FA0HG8V8NAFAMZ	kingÃ¢â‚¬â„¢s leo	6787	2018-09-02	1	0	apk k juty aram sy pathan ki shop may k mil jati hai aur aap ny cheat kya hai	Neutral	['juty', 'aram', 'cheat']
402	GE310FA1HFXXGNAFAMZ	waleed baig	7406	2016-04-03	5	1	mujhe lagta hai ke wazan mein kami ki kuleed aap ke kaam ki out monitoring kar rahi hai aur yeh fitness baind behtareen device hai foot baithta hai bohat hi aram da aur pursukoon hai mein bhi shayad hi mehsoos karsaktha hon jaisay mein ne usay pehna sun hwa hai aur iss ke sath sath uthaye gaye iqdamaat ki tadaad bhi durust tareeqay se hai aur calorie ka hisaab lagata hai jal gaya	Negative	['wazan', 'kami', 'monitoring', 'fitness', 'baind', 'behtareen', 'device', 'baithta', 'aram', 'pursukoon', 'mehsoos', 'iqdamaat', 'tadaad', 'durust', 'tareeqay', 'calorie', 'hisaab']
403	GE310FA1HFXXGNAFAMZ	Abdullah Haseeb	240	2016-05-19	4	1	yeh bend mehez na qabil maffi hai aur iss ka har aik hissa tawaqqa ke mutabiq tha mein iss ki tamam khususiyaat aur iss se kitna achchca kaam karta hon iss se bohat mutmaen hon battery ka waqt iss sab se behtar hai aik hafta aasani se mujhe hai aur iss terhan ke tareeqon ke sath notification alert heart monitor marhala calculator waghera rozana ki bunyaad par mere adad u shumaar ko seekhnay ke l …	Positive	['bend', 'qabil', 'hissa', 'tawaqqa', 'tamam', 'battery', 'waqt', 'hafta', 'aasani', 'tareeqon', 'notification', 'heart', 'monitor', 'marhala', 'calculator', 'rozana', 'behtareen']
404	GE310FA1HFXXGNAFAMZ	Zeeshan	6135	2019-12-12	3	0	agar aap ka maqsad wazan kaam karna hai tu phir yeh gharri aap ke liye hai agarchay mein kisi aur taakay premi ki tawaqqa kar raha tha lekin iss mein ziyada khususiyaat mojood nahi hain iss se aap ko aap ki ginti hogi iqdamaat aur aap ki dil ki sharah bhi lekin yeh bohat khobsorat hai aur kabhi kabhi baghair kisi wajah ke yeh mere phone par mojood app se rabita munqita hojata hai aur wahan jane k…	Negative	['maqsad', 'wazan', 'tawaqqa', 'mojood', 'ginti', 'iqdamaat', 'dil', 'khobsorat', 'baghair', 'wajah', 'mojood', 'rabita', 'wahan']
405	GE310FA1HFXXGNAFAMZ	Inayat (inna)	2324	2019-09-21	4	1	mein ne kal hi yeh khareeda hai mein janna chahta hon ke kya mein iss ke kampan waza ko band karsaktha hon aur usay bajne ki hesiyat se rakh sakta hon	Neutral	['chahta', 'band', '']
406	TS571FA0HG8V8NAFAMZ	Ahsan Faiz	492	2017-05-01	3	0	chamray ka miyaar theek hai lekin market mein dastyab miyaar se chhota hai lehaza mein un ko nahi pehan sakta taham mujhe waqai mein woh pasand karte hain ke woh bhi saaf silay hue hain aur design bhi kaafi mohazab tha	Positive	['chamray', 'miyaar', 'market', 'dastyab', 'miyaar', 'chhota', 'pehan', 'pasand', 'saaf', 'design']
407	TS571FA0HG8V8NAFAMZ	Rizwan Ahmad	4493	2017-10-24	5	0	yeh jootay pahannay mein aram da aur pursukoon hain aur un ki quality un ki qeemat mein bhi bohat achi hai woh uch they tankay lagtay hain aur achi terhan se farigh hotay hain lekin mein ny ghalti se chhootey size ka order diya tu mein ny usay apne bhai ko tohfay mein diya woh usay har roz p_hnta raha hai aur kaafi pasand aya	Positive	['jootay', 'pahannay', 'aram', 'pursukoon', 'quality', 'qeemat', 'tankay', 'farigh', 'ghalti', 'chhootey', 'size', 'order', 'bhai', 'tohfay', 'roz', 'phnta', 'pasand']
408	TS571FA0HG8V8NAFAMZ	Deepak	1430	2016-12-03	5	0	iss keemat p ya bhot ach hai	Neutral	['keemat']
409	GE310FA1HFXXGNAFAMZ	Muhammad pervaiz	3697	2018-12-10	4	1	mein abhi thori der se iss ka istemaal kar raha hon aur mujhe imandari ke sath iss ke khilaaf koi shikayat nahi hai mujhe iss se aksar ilzamaat nahi uthana parte hain iss se mujhe apne dil ki daraja bandi hoti hai aur mere marahil par bhi nigrani karte hain mujhe batatay hain mein nai kitni achi werzish ki hai mujhe bohat khushi hui hai jab mujhe apne phone se daur honay ki wajah se bhi yeh mujhe…	Positive	['thori', 'khilaaf', 'shikayat', 'aksar', 'dil', 'daraja', 'bandi', 'nigrani', 'kitni', 'werzish', 'khushi', 'daur', 'wajah', 'date', 'mousool', 'taaza']
410	GE310FA1HFXXGNAFAMZ	Fahad Anjum	1606	2019-12-09	4	1	fitness band mere liye bohat acha kaam karta hai mein nai iss ke baray mein online parha aur phir iss ke order karne ka iradah kya ularam aur notification up date se le kar iss mein bohat si achi khususiyaat hain yeh bhi hai ke mein istemaal shuda electronic ke muqablay mein iss ki battery ziyada lambi rehti hai mein nahi tha miyaar ke achh ie honay ki tawaqqa kar raha hon aur mujhe khushi hai ke…	Positive	['fitness', 'band', 'baray', 'online', 'order', 'ularam', 'notification', 'date', 'electronic', 'battery', 'lambi', 'miyaar', 'tawaqqa', 'khushi', 'behtareen', 'miyaar']
411	GE310FA1HFXXGNAFAMZ	Sarwat Malik	4936	2016-06-16	5	1	may ny ie chez bhot enjoy kya ha may zaroor kaho ga leny ko	Neutral	[]
412	PE033FA08EVRANAFAMZ	Haris Khan	2071	2017-08-27	5	0	may satisfied ho gett ki chezo sy	Neutral	['satisfied']
413	GE310FA1HFXXGNAFAMZ	Sanna	4889	2017-08-18	5	1	ya chez achi h leny k lya	Positive	[]
414	SU455FA18NJ18NAFAMZ	Sikandar Ali	5259	2016-02-18	4	0	acha hai lakin time ny set ho rha iss p	Positive	['time', 'set']
415	SU455FA18NJ18NAFAMZ	khalil	6770	2019-06-30	3	0	may ya wtch lena chata ho kyu k ya dekhny may achiii hai	Positive	['wtch']
416	SU455FA18NJ18NAFAMZ	Syed	5361	2019-05-10	1	1	daraz ka pehla tajurbah aur iss ke sath theek hai lekin mein masnoaat se mutmaen nahi hon mein nai qayadat wali gharri ka hukum diya jo miyaar mein achcha nahi tha	Positive	['pehla', 'tajurbah', 'masnoaat', 'miyaar']
417	SU455FA18NJ18NAFAMZ	Haider Ali	1968	2016-11-27	4	0	acha product h deilvery b tez hai phely bar lya hai koi chez daraz sy	Positive	['tez']
418	SU455FA18NJ18NAFAMZ	AH	68	2019-08-25	2	0	acha nai hai	Neutral	[]
419	SU455FA18NJ18NAFAMZ	Saad Khan	4628	2018-04-29	4	0	bhot achi nai h lakin keemat k lehaz sy achi hai	Positive	['keemat', 'lehaz']
420	SU455FA18NJ18NAFAMZ	jahangri	6710	2018-03-15	5	0	achi watch hai keemat kaam hai	Positive	['watch', 'keemat']
421	SU455FA18NJ18NAFAMZ	Zafrun	6036	2019-12-15	4	0	watch achi hai lkin waterproof nai hai	Positive	['watch', 'waterproof']
422	SA207FA041RFINAFAMZ	ShoeShopper	5226	2019-02-04	4	0	un sandle ke foot aur andaaz se mohabbat karen woh mushtaba se kahin ziyada barray lagtay hain lekin yeh barri hadd taq nahi kharidaron ko size kaam karne ka mahswara diya jata hai neez sandle ke paiir walay hissay par plastic ka ihata kaafi bara aur ghair aram da hai majmoi tor par un sandle se khush hain	Negative	['sandle', 'andaaz', 'mohabbat', 'kahin', 'barray', 'barri', 'size', 'sandle', 'paiir', 'hissay', 'plastic', 'bara', 'aram', 'majmoi', 'tor', 'sandle', 'khush']
423	GE310FA1HFXXGNAFAMZ	Urusa Fahim	5738	2017-03-03	5	1	iss device mein bohat durust hai iss se julne walay iqdamaat aur calorie ki tadaad ko mo asar andaaz mein andaza kya jata hai jis se mujhe apne kaam ke naqsha jaat ka naqsha banana asan hojata hai	Positive	['device', 'durust', 'iqdamaat', 'calorie', 'tadaad', 'asar', 'andaaz', 'andaza', 'naqsha', 'naqsha', 'banana', 'asan']
424	GE310FA1HFXXGNAFAMZ	Usman Haider	5762	2018-09-10	5	0	mujhe yeh aik apne waalid ke liye mila hai aur woh vaqata it usay pasand karte hain mein nay usay iss ke af aal aur kis terhan ki tadrees karni thi lekin woh usay iss ki aadat se jaldi se istemaal kar chuka hai iss se yeh zahir hota hai ke istemaal karna kitna asan hai mere waalid nay usay intehai mufeed paaya iss ke sath sath	Negative	['vaqata', 'pasand', 'jaldi', 'zahir', 'asan', 'intehai', 'mufeed', 'paaya', '']
425	GE310FA1HFXXGNAFAMZ	Salm	4786	2019-10-09	5	0	ya acha product hau eay may ny phely bar kuch online khareeda hai	Neutral	['online']
426	GE310FA1HFXXGNAFAMZ	yasmeen yousuf	7434	2017-05-01	5	0	yeh bilkul isi terhan kaam karta hai jaisay mein nai iss ki tawaqqa ki thi mein chobees ghantay khud par nigah rakh sakta hon aur apni dawaiyon ke liye bhi alarm laga sakta hon yeh sunehry saloon mein logon ke liye bohat mufeed hai aur yeh seekhnay mein yeh waqai asan hai bhi istemaal karen	Positive	['tawaqqa', 'ghantay', 'nigah', 'alarm', 'sunehry', 'saloon', 'logon', 'mufeed', 'asan', '']
427	GE310FA1HFXXGNAFAMZ	M Toqeer Shahid	2775	2017-08-18	5	0	yeh aik umdah aala hai driving ke douran yeh kaar amad hai aur aap ko apne phone par mojood it tila aat ke sath aap ko up date aur alert karta rehta hai	Neutral	['umdah', 'driving', 'douran', 'mojood', 'date']
428	GE310FA1HFXXGNAFAMZ	omer Khalil	7019	2018-02-23	5	0	yeh bohat jadeed aur vaqata helpful madadgaar bhi hai mein abhi kuch arsa se iss ka istemaal kar raha hon aur iss se munsalik honay ka kya matlab hai iss ki nai wazahat hogayi hai iss baind ke liye super likes	Positive	['jadeed', 'vaqata', 'helpful', 'madadgaar', 'munsalik', 'matlab', 'wazahat', 'baind', 'super']
429	GE310FA1HFXXGNAFAMZ	Qazi Muhammad	4249	2019-06-09	5	0	sach tu yeh hai ke mein iss alay ka aik bohat bara madah hon usay behtareen lagnay ke sath sath qabil itlaq aur qeemat bhi mil gayi yeh aik smart wtch mayns calling system hai	Positive	['bara', 'behtareen', 'qabil', 'qeemat', 'smart', 'wtch', 'calling', 'system']
430	TS571FA05JKRONAFAMZ	Noor.	4085	2017-09-21	4	0	halkay makhmal kapray ka mawaad din bhar pahannay mein naram aur aram da achay aram da aur pursukoon pahannay ke jootay shukriya daraz	Positive	['kapray', 'din', 'bhar', 'pahannay', 'naram', 'aram', 'aram', 'pursukoon', 'pahannay', 'jootay']
431	TS571FA05JKRONAFAMZ	Adnan Hussain	352	2017-07-27	5	0	mukammal par kyunkay mein daraz se bohat mutmaen hon yeh mera daraz se kharidari karne ka pehla tajurbah tha aur mujhe ishtihar ke mutabiq aik hi numeral mila hai yeh jootay pahannay mein aram da aur pursukoon hain aur qeemat ke liye bhi bohat maqool	Positive	['mukammal', 'kharidari', 'pehla', 'tajurbah', 'ishtihar', 'jootay', 'pahannay', 'aram', 'pursukoon', 'qeemat']
432	MA305FA1KY528NAFAMZ	Muhammad Farhan Habib	3554	2018-07-15	5	1	yeh tea shirts season ke l quite pakarney wali hain woh aram da aur pursukoon maday se bani tea sharts letay hain iss terhan halkay aur saans lainay mein aasani hoti hai silai kaafi saaf hai jis ki wajah se mein ny un shirts mein tawaqqa nahi ki thi tamam mere pasandeeda rang hain aur shirts ka koi bhi rang aur size dhoney ke baad tabdeel nahi sun hwa	Positive	['tea', 'shirts', 'season', 'pakarney', 'aram', 'pursukoon', 'maday', 'tea', 'sharts', 'aasani', 'silai', 'saaf', 'wajah', 'shirts', 'tawaqqa', 'tamam', 'pasandeeda', 'rang', 'shirts', 'rang', 'size', 'dhoney', 'tabdeel']
433	MA305FA1KY528NAFAMZ	Aleem	582	2018-07-06	4	1	darasal kameez mein se sirf aik ka masla tha baqi qmizin qeemat ke mutabiq aur maday ke miyaar ke mutabiq waqai uch and aur qabil amal hain aik chhota honay ki wajah se mehsoos sun hwa baqi kaamil thay mere liye	Positive	['kameez', 'masla', 'qmizin', 'qeemat', 'maday', 'miyaar', 'qabil', 'chhota', 'wajah', 'mehsoos', '']
434	MA305FA1KY528NAFAMZ	Muhammad Ali	3507	2020-01-08	4	1	yeh pack mausam ke l suitable mozoon hai mein ne woh saaray rang haasil kiye hain jin ka mein ne order diya hai aur yeh sab yahan ki terhan roshan hain quality bohat mohazab asan hai aur pahannay ke liye bohat ziyada aram da hai har aik ka size yeh mere liye aik jaisay aur kaamil thay	Positive	['pack', 'mausam', 'suitable', 'mozoon', 'rang', 'haasil', 'order', 'roshan', 'quality', 'asan', 'pahannay', 'aram', 'size']
435	MA305FA1KY528NAFAMZ	Ahmed Shabbir	470	2017-07-12	4	0	thandhi shirts woh theek hain miyaar agarchay behtar ho sakta tha silai ost hai lekin size aur fitting bilkul kaamil hai iss par khush hon	Positive	['thandhi', 'shirts', 'miyaar', 'silai', 'size', 'fitting', 'khush']
436	SH847FA13HMRANAFAMZ	Moeed	3204	2017-01-18	1	0	kabhi bhi iss baichnay walay se kharidari nah karen order size lekin wusool miyaar miyaar ke tehat hai qabil reham aur sasta tareen miyaar	Negative	['baichnay', 'kharidari', 'order', 'size', 'wusool', 'miyaar', 'miyaar', 'qabil', 'reham', 'sasta', 'miyaar']
437	MA305FA1KY528NAFAMZ	SHAHBAZ	4584	2018-09-17	1	0	adhi aasteen ke bajaye mukammal aasteen ki qmizin wusool ki apne ke sath khail nah karen kyunkay aap log inhen iss terhan kho bathain ge	Negative	['adhi', 'mukammal', 'qmizin', 'wusool', 'khail', 'log']
438	MA305FA1KY528NAFAMZ	Rana	4381	2017-08-24	2	0	tasweeron mein nahi dekhaya gaya stuf ke miyaar waisay bhi mujhe umeed hai ke agla miyaar behtar ho ga	Positive	['tasweeron', 'stuf', 'miyaar', 'umeed', 'miyaar']
439	MA305FA1KY528NAFAMZ	Jamshed Memon	2443	2019-01-10	4	1	tea shirts ke iss pack ko khareedna aik danish mandana faisla saabit sun hwa kyunkay woh itnay arram da aur pursukoon hain halkay aur naram tareen kapray ke sath silai hui sahih size aur fitting mein atay hain aur yahan taq ke rang bhi thanda hota hai khushii hai ke iss terhan ki mukhtalif aqsam ke sath meri almaari ittafaq se mausam ke liye pehnana hai	Positive	['tea', 'shirts', 'pack', 'khareedna', 'saabit', 'pursukoon', 'naram', 'kapray', 'silai', 'size', 'fitting', 'rang', 'thanda', 'mukhtalif', 'aqsam', 'mausam', 'pehnana']
440	SH847FA13HMRANAFAMZ	maria	6850	2017-09-03	5	0	umdah miyaar lekin jaisa ke aap ke yahan dekhaya gaya rang mukhtalif hai lekin achi cheezian	Positive	['umdah', 'miyaar', 'rang', 'mukhtalif']
441	SH847FA13HMRANAFAMZ	peaceful	7031	2017-04-27	1	0	ya sb sy busry shoes h jo ab tk lya h may ny	Neutral	['shoes']
442	SH847FA13HMRANAFAMZ	Masil	3056	2017-12-09	5	0	mujhy ya sneakers psnd h aur ya easy b hai	Neutral	['sneakers', 'psnd', 'easy']
443	MA305FA1KY528NAFAMZ	Saad	4618	2017-07-18	5	1	bhot achi quality hai aur pasy poori hoya hai	Positive	['quality', 'pasy']
444	SU455FA18NJ18NAFAMZ	Hasnain	2104	2019-12-17	5	0	yeh intehai garam ghari hai jis ki terhan website par dekha gaya hai aur quality bohat achi hai waqt muqarrar karne ke liye button ko tahmain aur tamam af aal uch running chal rahay hain shukriya	Positive	['intehai', 'garam', 'website', 'dekha', 'quality', 'waqt', 'button', 'tamam']
445	SU455FA18NJ18NAFAMZ	Mazhar	3079	2017-04-12	1	0	bhot buri quality h time wla button hi ny mil rha	Neutral	['buri', 'quality', 'time', 'button']
446	SU455FA18NJ18NAFAMZ	King Usman	2686	2016-05-08	1	0	mujhe aik naaqis tukda bheja jis ne munasib tareeqay se kaam nah kya ho nah bohat kaam khushi zahir karen aur nah hi daraz se koi order den ge yeh online ka order dena mera pehla tajurbah tha aur yeh acha nahi hai	Positive	['naaqis', 'tukda', 'munasib', 'tareeqay', 'khushi', 'zahir', 'order', 'online', 'order', 'pehla', 'tajurbah']
447	SU455FA18NJ18NAFAMZ	Irfan	2341	2017-06-14	5	0	jsy pic thi wsa hi mila hai aur kaam b acha kar rha hai	Positive	['pic']
448	SU455FA18NJ18NAFAMZ	fahdi	6508	2017-08-13	5	0	ya itna acha hai aur kaam b ach kar rha hai koi masla ny h iss k sath	Positive	['masla']
449	FA628FA10DJF2NAFAMZ	Jamil	2434	2019-03-27	2	0	mein ne ka order diya lekin baichnay walay ne bheja farokht kanandah la parwah hai iss muahiday ki sifarish nah karen bilkul bhi nahi	Negative	['order', 'baichnay', 'farokht', 'sifarish']
450	FA628FA10DJF2NAFAMZ	Ather Mehmood	1077	2017-05-10	5	0	mein neh iss numeral ka order kya numeral same ki terhan hai jaisa ke yeh shabih mein dekhaya ja raha hai rupay ke tehat yeh money ke saudey ke l aa aik achi aur qeemat hai jis ki sifarish ki jati hai	Negative	['neh', 'order', 'rupay', 'money', 'qeemat', 'sifarish']
451	OA551FA0MDUJGNAFAMZ	Raza	4431	2019-12-05	5	1	iss ki qeemat ke qabil mein ne aaj inhen mil kar mujhe bohat khushi hui hai ke woh waisay hi hain jaisay unhon ne wada kya tha	Positive	['qeemat', 'qabil', 'khushi', '']
452	OA551FA0MDUJGNAFAMZ	Sufiyan Kamal	5327	2017-01-03	4	0	jootay achh are hain iss qeemat mein mein iss ki umdah baat keh sakta hon lekin iss ki tawaqqa nahi kar raha tha size mukhtalif hain lekin khaas tor par iss mein koi buri baat nahi khaas tor par iss qeemat mein	Negative	['jootay', 'qeemat', 'umdah', 'tawaqqa', 'size', 'mukhtalif', 'khaas', 'tor', 'buri', 'khaas', 'tor', 'qeemat']
453	GE310FA1HFXXGNAFAMZ	Mr Abroi	3290	2018-07-30	5	0	battery iss ki sab se barri khasusiyat hai kyunkay yeh mere liye din se ziyada waqt se kaam kar rahi hai aur ab bhi iss mein ras hai mein iss ke muqablay mein bhi foot baithak ka malik hon yeh itna mashhoor nahi hai lekin yeh isi terhan kaam karta hai asan hai aur bhi qaim	Negative	['battery', 'barri', 'khasusiyat', 'din', 'waqt', 'asan', '']
454	GE310FA1HFXXGNAFAMZ	Zia	6152	2019-03-13	5	1	batter bhot waek h iss ki aur waterproof b nai h ya	Neutral	['batter', 'waterproof']
455	GE310FA1HFXXGNAFAMZ	Wasif Memon	5926	2017-06-03	3	0	jaisa ke mein nay kal iss bind ko order kya tha aur aaj ki taiz raftaar tarseel ko kehte hain aur mujhe iss numeral se koi warranty nahi mili kyun nahi maloom ke mein nay pehlay hi daraz team se kyun shikayat ki hai lehaza iss cheez ko khareedne ke baad aap ko warranty milni hai ya nahi iss ki jaanch partaal karni hogi haqeeqat yeh hai ke yeh bind koi foot butt bind nahi hai iss product ka asal n…	Neutral	['bind', 'order', 'taiz', 'raftaar', 'warranty', 'maloom', 'pehlay', 'team', 'shikayat', 'khareedne', 'warranty', 'jaanch', 'partaal', 'haqeeqat', 'bind', 'bind', 'asal', 'naam', 'bind', 'touch', 'screen', 'ungli', 'touch', 'battery', 'waqt', 'kahin', 'bind', 'bind', 'alarm', 'device', 'masla', '']
456	GE310FA1HFXXGNAFAMZ	Abdur Rehman Akhtar	267	2019-07-23	5	0	yeh taakay ka itna herat angaiz tukraa hai waqt zahir karne ke ilawa zahir hai ke iss mein mutadid deegar fitness khususiyaat bhi hain jaisay jalti hui calorie ginti hai aur alarm aur caller notification ke liye bhi istemaal ki ja sakti hai	Neutral	['herat', 'angaiz', 'tukraa', 'waqt', 'zahir', 'zahir', 'mutadid', 'fitness', 'calorie', 'ginti', 'alarm', 'caller', 'notification']
457	GE310FA1HFXXGNAFAMZ	Fazal	1793	2018-05-18	4	0	yeh baind herat angaiz hai yeh nah sirf meri samaat ki sharah ki nigrani mein madad karta hai balkay yeh mujhe apne ird gird ke sath taaza kaari aur mutabqat pazeer bhi rakhta hai battery mujhe daidh hafta ke lag bhag chalti hai jo kuch bhi bura nahi hai	Positive	['baind', 'herat', 'angaiz', 'samaat', 'nigrani', 'madad', 'gird', 'taaza', 'mutabqat', 'battery', 'hafta', 'chalti']
458	GE310FA1HFXXGNAFAMZ	Ali Mukhtar	623	2019-04-16	4	0	mein thora sa mayoos hon kyun ke alarm mere aayi u s device s par kaam nahi kar raha hai mein nai har mumkin koshish ki hai majmoi tor par masnoaat bohat achi hai ke tamam khususiyaat kaam kar rahi hain aur cheeni miyaar ki deegar khususiyaat se bhi behtar hai tu mein sab ko iss ki sifarish karoon ga	Positive	['mayoos', 'alarm', 'device', 'koshish', 'majmoi', 'tor', 'masnoaat', 'tamam', 'cheeni', 'miyaar', 'sifarish']
459	GE310FA1HFXXGNAFAMZ	hamza	6594	2019-03-17	4	0	lambi lambi lambi battery ki zindagi lekin notification set up itna acha nahi hai lekin theek alarm bhi theek hai mein aap ko mahswara dun ga ke agar aap ko apne mobile se bohat ziyada mulawis hai tu aap ko fa aal rehne ke l must usay zaroor istemaal karen	Positive	['lambi', 'lambi', 'lambi', 'battery', 'zindagi', 'notification', 'set', 'alarm']
460	GE310FA1HFXXGNAFAMZ	Possibly the best ever	4194	2016-02-20	4	0	yeh aik umdah aala hai un smart wtch se kahin ziyada behtar bunyadi tor par kyunkay battery taweel arsa taq chalti hai aur aap usay kalon ke l usay istemaal nahi kar saktay hain iss se aap ko apne phone par mojood it tila aat se taaza kaari aur mutnabba rehta hai aur iss mein dil ki dharkan monitor bhi hai sab se barh kar yeh aik ba salahiyat masnoaat hai	Positive	['umdah', 'smart', 'wtch', 'kahin', 'tor', 'battery', 'taweel', 'chalti', 'mojood', 'taaza', 'dil', 'monitor', 'salahiyat', 'masnoaat']
461	GE310FA1HFXXGNAFAMZ	Nabeel Nasir	3864	2017-12-28	4	0	ibtidayi tor par iss ka istemaal nahi kya tha lekin ab aik baar jab mein nai iss ka istemaal muratab karliya hai tu mein usay kabhi bhi band nahi karta hon yeh aap ke apne aap ko talaash karne ke qabil aik tajurbah hai mein iss ko istemaal mein aasani ke l par par darja dun ga aur baqaidagi se up date aur nigrani faraham karna	Negative	['ibtidayi', 'tor', 'band', 'talaash', 'qabil', 'tajurbah', 'aasani', 'darja', 'baqaidagi', 'date', 'nigrani', 'faraham']
462	OA551FA0DDVVWNAFAMZ	Farhat	1721	2017-11-16	5	0	yeh achay miyaar ke jootay hain mujhe iss ki tawaqqa thi lekin yeh meri tawaquaat se ziyada hai itni kaam qeemat mein mein kidt ko kar raha hon yeh jootay aram da aur pursukoon hain aur military ke liye zurori admi ke mutabiq	Positive	['miyaar', 'jootay', 'tawaqqa', 'tawaquaat', 'qeemat', 'jootay', 'aram', 'pursukoon', 'zurori']
463	OA551FA0DDVVWNAFAMZ	Nadir	3890	2019-02-06	5	0	mujhe nahi maloom tha ke mein premium miyaar hoga mujhe jis ki zaroorat hai mutmaen shukriya daraz	Positive	['maloom', 'premium', 'miyaar', 'zaroorat']
464	SO347FA0EI8QONAFAMZ	Kareem Mukhtar	2585	2018-03-21	5	0	yeh chamray ke mozay khareede kyunkay mein shumali ki janib jane ke baarey mein mansoobah bana raha hon aur sirf un sooraton mein mil raha hon ab taq miyaar bohat aaccha hai aur size bhi kaamil hai aik baar zip phas gaya jo pareshani ka baais bana lekin mein iss se guzar gaya	Negative	['chamray', 'khareede', 'mansoobah', 'miyaar', 'size', 'zip', 'phas', 'pareshani', '']
465	SO347FA0EI8QONAFAMZ	@li	27	2016-09-18	5	0	wakt p ila quality b achi hai	Negative	['wakt', 'quality']
466	SO347FA0EI8QONAFAMZ	Asad	966	2019-03-10	1	0	baichnay wala naaqis hai numeral kharab hai aur iss ke sath hi nuqsaan bhi kaam hai iss se nahi khridte hain dikhayi jaany wali shabih alla miyaar ki hai aur intahi kamtar reham wala hai dono paun dayen taraf ke paun ke liye chupkay hue hain	Positive	['baichnay', 'naaqis', 'nuqsaan', 'dikhayi', 'alla', 'miyaar', 'reham', 'paun', 'taraf', 'paun', '']
467	SU455FA18NJ18NAFAMZ	Zargham	6105	2018-10-28	4	0	gharri ka miyaar u bilkul wazeh nahi hai jaisa ke tasweeron mein dekhaya gaya hai yeh aik sala bache ka khilona lagta hai aur jo mujhe mila iss ke button mein masla hai sirf thora sa dabanay ki zaroorat hai lekin theek hai	Negative	['miyaar', 'wazeh', 'tasweeron', 'bache', 'khilona', 'button', 'masla', 'dabanay', 'zaroorat']
468	SU455FA18NJ18NAFAMZ	Aftab	405	2018-08-31	5	0	mujhy psnd h ya watch	Neutral	['psnd', 'watch']
469	SU455FA18NJ18NAFAMZ	Faiz Ul Karim	1650	2018-07-27	5	0	yeh bohat kaam qeemat mein bohat ahcha numeral hai mein iss ki masnoaat ko rs mein shipping shipping mein kharidata hon mujhe aakhri mah se haasil hai aur yeh hamesha kaam karta hai aur aik nai gharri ke tor par	Positive	['qeemat', 'masnoaat', 'aakhri', 'haasil', 'tor']
470	MA305FA1KY528NAFAMZ	Saif Ali	4731	2019-06-14	4	1	mujhe iss numeral ka miyaar pasand aya agarchay daraz se tea shirts ke pack hamesha achay ki tawaqqa ke mutabiq nahi hotay hain lekin khush qismati se yeh theek theen aur khaas tor par iss qeemat ki hadd mein yeh wohi thi jis terhan yeh daraz par namodaar hui thi mujhe koi aib nahi mila un tea shirts par usay munasib lagayen ya silai mein rakhen	Positive	['miyaar', 'pasand', 'tea', 'shirts', 'pack', 'tawaqqa', 'khush', 'qismati', 'khaas', 'tor', 'qeemat', 'aib', 'tea', 'shirts', 'munasib', 'silai']
471	MA305FA1KY528NAFAMZ	Anonymous	845	2019-05-20	1	0	mein ne un se paanch shirts ki jori talabb ki lekin unhon ne mujhe ghalat rang diya na umeed	Positive	['shirts', 'jori', 'talabb', 'ghalat', 'rang', 'umeed']
472	MA305FA1KY528NAFAMZ	Abdul Hannan	177	2019-08-19	5	1	rang itnay dilkash hain aur mujhe un se mahroom kardiya gaya tha qeematon ko zehan mein rakhtay hue yeh qmizin kaafi mohazab hain chizen khech jati hain aur online shopping se sahih size haasil karna aik barri kamyabi hai dd	Negative	['rang', 'dilkash', 'kardiya', 'qeematon', 'qmizin', 'chizen', 'online', 'shopping', 'size', 'haasil', 'barri']
473	MA305FA1KY528NAFAMZ	Babar	1203	2019-04-23	4	1	miyaar itna acha nahi tha lekin agar aap qeemat ko dekhen tu mujhe lagta hai ke aap mutmaen ho jaien ge yeh aap ko paanch mukhtalif rangon ka ikhtiyar faraham karta hai aur mausam garma ke istemaal ke l acha hai	Neutral	['miyaar', 'qeemat', 'mukhtalif', 'faraham', 'mausam', 'garma']
474	MA305FA1KY528NAFAMZ	Bilal Khan	1286	2017-12-15	4	1	yeh tea shirts theek hain mujhe un shirts ke miyaar size aur fitting se koi masla nahi hai mera order tasweer ke mutabiq tha tamam rang itnay kaamil thay aur nah hi kapray dhoney mein khoon beh raha hai	Negative	['tea', 'shirts', 'shirts', 'miyaar', 'size', 'fitting', 'masla', 'order', 'tasweer', 'tamam', 'rang', 'kapray', 'dhoney', 'khoon']
475	MA305FA1KY528NAFAMZ	Umar Ellahi	5694	2016-03-21	4	1	un ko mausam ke l have rakhna achha hai kyunkay mad soft naram aur raahat bakhash hai site ke jaisay hi rang masool hue hain yeh sab khobsorat mohazab hain aur un chay te ke baray mein aik behtareen hissa hai jo woh skrh nahi paye thay ya dhoney ke baad dhundlaa ho gaya un sab ko kaamil size mein mila	Positive	['mausam', 'rakhna', 'mad', 'soft', 'naram', 'raahat', 'bakhash', 'site', 'rang', 'masool', 'khobsorat', 'baray', 'behtareen', 'hissa', 'dhoney', 'dhundlaa', 'size']
476	OA551FA1B35TGNAFAMZ	Shayan	5146	2017-08-17	3	0	quality bhot fazool hai	Negative	['quality', 'fazool']
477	OA551FA1B35TGNAFAMZ	Judged-By-Rana	2511	2017-08-23	4	0	intehai susti qeemat par mohazab nazar anay walay bas itna sukoon hai ke mujhe yeh aik se ziyada baar khareed len	Negative	['intehai', 'susti', 'qeemat', 'sukoon']
478	OA551FA1B35TGNAFAMZ	Azhar	1170	2018-06-01	3	0	qaulty bs thek hi h ur aaj mila h mujhy	Neutral	['qaulty', 'thek']
479	OA551FA0YSCM4NAFAMZ	Farhan	1704	2019-12-28	2	0	pic aur real may bhot difference hai aur quality b ok h	Negative	['pic', 'real', 'difference', 'quality']
480	OA551FA0YSCM4NAFAMZ	Saqib	4895	2019-03-26	3	0	yeh aik jora sirf rupay hai iss par ghhor karte hue mein iss ki khoubsurti se baat karoon ga lekin ab mein sochta hon ke iss ke bajaye aik jora rupay mein khareedain lekin kaam se kaam aik behtar miyaar	Negative	['jora', 'rupay', 'khoubsurti', 'jora', 'rupay', 'miyaar']
481	OA551FA0YSCM4NAFAMZ	Muhammad Ruhayl	3621	2019-05-18	3	0	hello mein samjhta hon ke mera order eid ke bilkul qareeb tha lekin jab mein nai siyah aur bhuri sandle ke aik packet ke liye order diya tu woh mujhe aik hi rang brown ke sandle bhejnay ka juwaz paish nahi karta hai baraye meharbani mahswara karen ke iss ka haal kab nikala ja sakta hai iss eid mein mein sirf brown sandle pehnoon ga mein agarchay numeral se mutmaen hon yeh kaafi aram da hai	Positive	['order', 'qareeb', 'siyah', 'bhuri', 'sandle', 'packet', 'order', 'rang', 'brown', 'sandle', 'meharbani', 'brown', 'sandle', 'aram']
482	OA551FA0YSCM4NAFAMZ	waqar	7409	2016-11-04	5	0	bohat achi masnoaat aur qeemat achi hai mein jaanta hon har aik ko sifarish karoon ga abhi abhi shipping mein thora sa takheer abhi qeemat aur masnoaat ka miyaar theek hai tu setaaray	Positive	['masnoaat', 'qeemat', 'jaanta', 'sifarish', 'takheer', 'qeemat', 'masnoaat', 'miyaar', 'setaaray']
483	OA551FA0YSCM4NAFAMZ	Hozaifa	2186	2018-03-28	1	0	bohat kaam qeemat bhi nahi hai lekin yahan qeemat ziyada hai	Positive	['qeemat', 'qeemat']
484	DA290FA01AS88NAFAMZ	jamil381	6720	2019-08-12	5	0	kaam keemat may acha style wala hai	Positive	['keemat', 'style']
485	DA290FA01AS88NAFAMZ	M Safeer	2771	2016-08-18	5	0	numeral umomi istemaal ke l good achi aur kisi hadd taq qabil aetmaad hai lekin baichnay walay ko hukum diya sun hwa size ke baray mein yakeeni banana chahiye size bhejen jo kstmr chahta hai aur order ki tafseelaat mein bhi zikar karen baichnay walay aur daraz team ko bhejnay ya bhejnay se pehlay sarfeen ki masnoaat ki zaroorat ko yakeeni banana chahiye	Positive	['good', 'qabil', 'aetmaad', 'baichnay', 'size', 'baray', 'banana', 'size', 'chahta', 'order', 'tafseelaat', 'baichnay', 'team', 'pehlay', 'masnoaat', 'zaroorat', 'banana']
486	ZA401FA0Q8JTSNAFAMZ	muhammad	6917	2016-04-04	1	0	sb iss ko khareed lo	Neutral	[]
487	ZA401FA0Q8JTSNAFAMZ	Farhan Saqib	1715	2018-02-15	5	0	price k lihaz sy bhot acha h ya	Neutral	[]
488	ZA401FA0Q8JTSNAFAMZ	Syed Ali Raza Kazmi	5374	2017-08-15	1	0	ya juty rubber sy banny hai	Positive	['juty']
489	ZA401FA0Q8JTSNAFAMZ	Bilal AHmed	1275	2017-03-11	1	0	ya raja bazar may k mil rhi hai	Neutral	['bazar']
490	ZA401FA0Q8JTSNAFAMZ	Nisar Butt	4056	2019-11-15	1	0	zaib mujh sy contact kry product k bari may baat karni h	Positive	['contact', 'bari']
491	OA551FA02JMCKNAFAMZ	KH	2536	2017-11-04	5	0	may kush ho quality sai h paso k lihaz sy	Negative	['quality']
492	OA551FA02JMCKNAFAMZ	Malik	2987	2017-12-24	5	0	mujhy sai lagi h ya shoes	Neutral	['shoes']
493	OA551FA02JMCKNAFAMZ	Waheed Liaqat	5840	2019-07-08	1	0	yeh farosh acha nahi hai sabr chamray ke pict dikha rahay hain lekin asal hawala ki jane wali masnoaat masnoi chamray ki hai kaam miyaar ki	Negative	['chamray', 'asal', 'masnoaat', 'masnoi', 'chamray', 'miyaar']
494	OA551FA02JMCKNAFAMZ	Khurshid	2677	2019-05-19	5	0	achi juty h jsy pic may thi	Positive	['juty', 'pic']
495	OA551FA02JMCKNAFAMZ	Saeed	4698	2018-06-17	4	0	intehai premium miyaar aur raahat nahi balkay qeemat par ghhor karne se joota itminan bakhash tha	Negative	['intehai', 'premium', 'miyaar', 'raahat', 'qeemat', 'joota', 'itminan', 'bakhash']
496	OA551FA02JMCKNAFAMZ	Mohsin	3243	2016-07-03	4	0	intehai premium miyaar aur raahat nahi balkay qeemat par ghhor karne se joota itminan bakhash tha	Negative	['intehai', 'premium', 'miyaar', 'raahat', 'qeemat', 'joota', 'itminan', 'bakhash']
497	OA551FA02JMCKNAFAMZ	Medi	3085	2019-05-31	3	0	andar sy roughf hai wsy abki thek hai	Neutral	['roughf', 'thek']
498	OA551FA02JMCKNAFAMZ	Muhammad	3482	2018-04-25	3	0	material thek hai lakin ziyda acha nai hai	Neutral	['material', 'thek', 'ziyda']
499	OA551FA02JMCKNAFAMZ	Sharyar	5138	2018-04-22	5	0	acha product hai jsa pic may tha	Positive	['pic']
500	OA551FA1D5IFSNAFAMZ	Imran Kh	2298	2018-02-09	5	0	mujhy psnd hai amazing chez h price b kaam hai	Neutral	['psnd', 'amazing']
501	OA551FA1D5IFSNAFAMZ	Qaisar	4213	2016-10-08	2	0	kaam quality ka poduct hai jsa pic may tha us sy better hai	Negative	['quality', 'poduct', 'pic']
502	OA551FA1D5IFSNAFAMZ	Ishtiaq	2383	2019-03-24	1	0	mein ne du set order kiye aur un mein se aik bhi aik haftay mein zindah nahi raha bohat kaam miyaar ka mawaad jo aik du din mein toot jata hai yeh nahi pesey ki kal zaya karna	Negative	['set', 'order', 'haftay', 'zindah', 'miyaar', 'din', 'toot', 'pesey']
503	OA551FA1D5IFSNAFAMZ	Umar	5690	2018-06-22	3	0	acha hai lakin color wo nai h jo pic may tha	Neutral	['color', 'pic']
504	SU455FA18NJ18NAFAMZ	SHANI	4587	2018-05-08	5	0	acha aur style wali chez h mens k lya	Positive	['style']
505	GE310FA1HFXXGNAFAMZ	Affirmative quality	386	2016-05-18	4	0	aa thora mehghan ga costly h overall acha hai	Positive	['costly']
506	GE310FA1HFXXGNAFAMZ	Haji tehsin	1985	2020-01-28	4	0	foot bind sara din mera health monitor rehta hai yeh mujhe apne dil ki dharkan ke baarey mein taaza tareen maloomat deta hai aur mujhe batata hai ke mein nay poori muddat mein kitni calorie jalayi hai iss se mere phone aur mutasir kin battery se iss par tamam it tila aat haasil karne mein bhi madad millti hai zindagi mein usay charge ki zaroorat hoti hai haftay mein aik baar	Negative	['bind', 'din', 'health', 'monitor', 'dil', 'taaza', 'maloomat', 'kitni', 'calorie', 'mutasir', 'battery', 'tamam', 'haasil', 'madad', 'zindagi', 'charge', 'zaroorat', 'haftay']
507	GE310FA1HFXXGNAFAMZ	Naveed Jamil	3985	2018-07-23	5	0	yeh mujhe apne bhai ke liye mila hai aur woh vaqata really usay pasand karta hai mujhe usay kabhi istemaal nahi karna para lekin iss ke paas har waqt yeh baat hoti hai battery ki zindagi aur yeh iss ke phone se kaisay hai iss ke baarey mein bohat baat karta hai lehaza yeh achchca hona chahiye	Negative	['bhai', 'vaqata', 'pasand', 'waqt', 'battery', 'zindagi', 'kaisay']
508	GE310FA1HFXXGNAFAMZ	Maham Zaheer	2936	2017-07-06	4	1	yeh mujhe apne bhai ke liye mila hai aur woh vaqata really usay pasand karta hai mujhe usay kabhi istemaal nahi karna para lekin iss ke paas har waqt yeh baat hoti hai battery ki zindagi aur yeh iss ke phone se kaisay hai iss ke baarey mein bohat baat karta hai lehaza yeh achchca hona chahiye	Negative	['bhai', 'vaqata', 'pasand', 'waqt', 'battery', 'zindagi', 'kaisay']
509	GE310FA1HFXXGNAFAMZ	Saleem Khalid	4777	2018-08-16	5	0	mein yeh jaan kar waqai khush hon miyaar achh is hai aur yeh apne aap mein bhi aik health monitor hai mein iss se kitna hooshiyar aur hamwar hai	Positive	['khush', 'miyaar', 'health', 'monitor', 'hooshiyar', 'hamwar']
510	SU455FA18NJ18NAFAMZ	Muhammad Danish	3544	2017-12-06	4	0	mujhy psnd h aur quality b bethr h iss ki	Negative	['psnd', 'quality']
511	GE310FA1HFXXGNAFAMZ	Hina	2169	2017-06-26	5	0	kya koi mujhe bta sakta hai ke kun sa app wood b iss bind ke l suitable mozoon hai pallay store par koi foot app nahi hai taakay meri madad karen	Positive	['wood', 'bind', 'suitable', 'mozoon', 'store', 'madad']
512	GE310FA1HFXXGNAFAMZ	Umair Zubair	5686	2016-05-29	4	0	iss fitness bend ke baarey mein sab se achi baat iss ny apni sahet aur nigrani ke baarey mein mujhe zahanat se dochar kardiya hai nah sirf yeh mujhe iss par apne phone ki ittila deta hai balkay iss ki apply kishn ke zareya iss ka muwafiqat pazeer mujhe apne dil ki nigrani karne deta hai aur iss ki lambi lambi battery bhi hai jis par mein apne tamam ko tarteeb dainay mein bohat mufeed paaya	Positive	['fitness', 'bend', 'sahet', 'nigrani', 'kardiya', 'dil', 'nigrani', 'lambi', 'lambi', 'battery', 'tamam', 'tarteeb', 'mufeed', 'paaya']
513	GE310FA1HFXXGNAFAMZ	Saim	4738	2016-03-19	3	0	kya aap kis app ki setting bta sakti h mujhy	Neutral	['setting']
514	SI296FA07JE14NAFAMZ	Fahim	1624	2017-12-03	5	0	mein ne bohat aram da aur munasib qeemat khareedi aur mil gayi hai daraz ka shukriya	Positive	['aram', 'munasib', 'qeemat', 'khareedi']
515	AC743FA0LPO3CNAFAMZ	Ajlal Aftab	552	2016-07-23	5	0	jab aap kisi online cheez ka order dete hain tu aap ko hamesha shak hota hai lekin yeh kharidari itni herat angaiz thi ke iss nai un tamam shukook u shubhat ko daur kardiya kyunkay yeh jarabon ke miyaar mein bohat achay aur pahannay mein aasani thi aur behtareen hissa iss ka kaam kaat design hai jo yaqeenan inhen ke neechay posheeda bana deta hai	Positive	['online', 'order', 'kharidari', 'herat', 'angaiz', 'tamam', 'shukook', 'shubhat', 'daur', 'kardiya', 'jarabon', 'miyaar', 'pahannay', 'aasani', 'behtareen', 'hissa', 'kaat', 'design', 'neechay', 'posheeda']
516	OA551FA0YSCM4NAFAMZ	Behzad	1257	2017-05-06	1	0	iss se koi farq nahi parta hai ke yeh kitna sasta hai quality factor bhi iss par laago nahi hota hai	Negative	['sasta', 'quality', 'factor']
517	OA551FA0YSCM4NAFAMZ	Waqas Ul Islam	5903	2019-01-24	1	0	mein ne un saindal mein se jurey khareede dono kisi nah kisi terhan kaat rahay hain mera matlab hai ke ittifaqi tor par karkhana daar ke zareya kaat diya gaya hai lehaza mukhtasir tor par hum usay keh satke hain	Negative	['jurey', 'khareede', 'kaat', 'matlab', 'tor', 'kaat', 'mukhtasir', 'tor']
518	OA551FA1B35TGNAFAMZ	Zubi	6187	2019-09-27	1	0	mere shohar yeh jootay istemaal kar rahay hain aur woh mujhe bta rahay thay ke yeh mujhe jootay ke neechay se pareshan kar raha hai	Negative	['shohar', 'jootay', 'jootay', 'neechay', 'pareshan']
519	OA551FA1B35TGNAFAMZ	Fazal Cheema	1794	2018-06-14	5	0	product mil uski qualit achi thi	Positive	['qualit']
520	OA551FA1B35TGNAFAMZ	Ahad Nadeem	424	2019-04-15	4	0	yeh jootay ki aik achi jori hai yeh chamray ki terhan nazar aati hai lekin haqeeqat mein aisa nahi hai yeh aik alla miyaar ki rekseen hai jo chamray ki terhan dikhti hai mein jootay ka aik jora haasil karna chahta tha jo qeemat ke mutabiq hai aur yeh har jagah pehna ja sakta hai mein ne un jootay ka hukum diya aur jab mujhe yeh cheezain mil gayeen tu mujh par aetmaad karen ke woh itnay achay thay…	Positive	['jootay', 'jori', 'chamray', 'haqeeqat', 'alla', 'miyaar', 'rekseen', 'chamray', 'jootay', 'jora', 'haasil', 'chahta', 'qeemat', 'jootay', 'cheezain', 'aetmaad', 'haqeeqat', 'quality', 'umdah', 'aram', 'jootay']
521	OA551FA1B35TGNAFAMZ	Abdul Mutlab	191	2019-09-02	4	0	ya naram leather ka joota hai	Positive	['naram', 'leather', 'joota']
522	OA551FA1B35TGNAFAMZ	Assad Rana	1065	2016-04-09	4	0	yeh chamra nahi hai lekin yeh aik alla miyaar ki hai yeh mere peeron par achi lagti hai aur mein iss ke sath aasani se chal sakta hon un jooton mein lambi paidal chalna theek hai aur iss se mere peeron ko takleef nahi pahunchti jootay aram da aur pursukoon hain aur yeh jald se chilkay nahi cheenta yeh aik chamakdar hai sirf aik hi kharabi yeh hai ke woh dobarah aasani se matti pakadati hai basora…	Positive	['alla', 'miyaar', 'aasani', 'lambi', 'paidal', 'takleef', 'jootay', 'aram', 'pursukoon', 'chilkay', 'chamakdar', 'kharabi', 'dobarah', 'aasani', 'matti', 'majmoi', 'tor', 'jootay', 'pasand', 'qeemat']
523	OA551FA1B35TGNAFAMZ	Kamran Irfan	2571	2019-03-24	4	0	yeh jootay pahannay mein waqai aram da aur pursukoon hain aur yeh achi terhan se silai aur achi terhan se banaye gaye hain qeemat ke liye yeh uch cas tor par idhar idhar pahannay ke liye un jootay ka intikhab karna aik behtareen intikhab hai	Positive	['jootay', 'pahannay', 'aram', 'pursukoon', 'silai', 'qeemat', 'cas', 'tor', 'pahannay', 'jootay', 'behtareen']
524	OA551FA1B35TGNAFAMZ	Imtiaz	2314	2019-06-01	4	0	quality product hai aur delivery timg b chee hai	Positive	['quality', 'timg']
525	MA305FA1KY528NAFAMZ	Muhammad Anas Moavia	3517	2016-03-08	4	1	haal hi mein yeh tea shirts masool hui hain aur khush qismati se waqt par qeemat ke mutabiq yeh aik behtareen pack hai iss mausam ke liye meri almaari mein kaamil joor hai yeh naram tareen tane banay saaf tor par silai aur aram da aur pursukoon pahannay ke liye misali hai mein waqai mein iss se mohabbat karta tha rang ki had yeh sab bohat achay aur khalis hain kisi bhi shirt nai dhoney ke baad ap…	Positive	['tea', 'shirts', 'masool', 'khush', 'qismati', 'waqt', 'qeemat', 'behtareen', 'pack', 'mausam', 'naram', 'tane', 'saaf', 'tor', 'silai', 'aram', 'pursukoon', 'pahannay', 'misali', 'mohabbat', 'rang', 'khalis', 'dhoney', 'rang', 'shakal', 'mukammal', 'tor', 'sukarnay', 'size', 'fitting', 'khushi']
526	MA305FA1KY528NAFAMZ	Haider Ali Khan	1970	2018-04-10	4	1	wah ki terhan mein tawaqqa nahi kar raha tha ke qeemat ke paish e nazar yeh qmizin iss ke achh be hon gi ab mein yeh keh sakta hon ke mein nai yeh qmizin saudey mein utaar di hain kyunkay yeh shirt bohat hi umdah tankay hue hain aur un ke rang waqai tar u tazah hain jab se mere paas hai un ko mil gaya mein khud ko un mein se har aik mein se har din pehnay hue paaya woh mere liye uthnay ki terhan …	Positive	['tawaqqa', 'qeemat', 'qmizin', 'qmizin', 'umdah', 'tankay', 'rang', 'tazah', 'din', 'pehnay', 'paaya', 'munasib', 'zindagi', 'libaas', 'saada', 'tea', 'chahta', 'dosaron', 'zindagi', 'sukoon', '']
527	MA305FA1KY528NAFAMZ	raja ali	7055	2017-11-16	5	1	yeh kuch zabardast shirts hain size aur fitting bilkul mozoon hai aur woh par ke qabil hain tamam rang roshan aur site par mushtahir hotay hain zabardast kaam ie	Positive	['zabardast', 'shirts', 'size', 'fitting', 'mozoon', 'qabil', 'tamam', 'rang', 'roshan', 'site', 'zabardast', '']
528	MA305FA1KY528NAFAMZ	Mohsin Sabir	3252	2017-02-26	5	1	iss terhan ki susti qeemat mein saaf silai aur aram da aur pursukoon mawaad woh cheez hai jis nai mujhe sab se ziyada mutwajjah kya yeh qmizin season ke l perfect behtareen hain aur mujhe lag raha hai ke un ko laga raha hon tamam rang bohat achay hain aur mujhe khushii hai ke un ko meri almaari mein shaamil karliya gaya	Positive	['susti', 'qeemat', 'saaf', 'silai', 'aram', 'pursukoon', 'mutwajjah', 'qmizin', 'season', 'perfect', 'behtareen', 'tamam', 'rang', 'shaamil']
529	MA305FA1KY528NAFAMZ	Muhammad Salman	3628	2018-07-28	4	1	yeh shirts waqai aram da aur pursukoon hain lekin mein se aik website par dukhaay jane walay rang ki terhan nahi tha lekin qata nazar iss se mutmaen nahi hon kyunkay rang size fitting woh sab waqai behtar tor par wazeh hain	Negative	['shirts', 'aram', 'pursukoon', 'website', 'dukhaay', 'rang', 'rang', 'size', 'fitting', 'tor', 'wazeh', '']
530	MA305FA1KY528NAFAMZ	Qaisar Nazeer	4214	2018-01-28	3	1	miyaar bohat achchca hai size bilkul kaamil aya aur wohi rang mile jo website par mojood hain lekin aik cheez jis ne mujhe lafzi tor par dochar kya woh yeh hai ke mein ne unhein khaas tor par garmiyon ke liye khareeda tha lekin mein inhen garmiyon ke liye mozoon nahi paaya kyunkay yeh mota hai iss qisam ki nahi jis ki mein ne tawaqqa ki thi agar mein sardiyoon ke l kept rakhta hon majmoi tor par …	Negative	['miyaar', 'size', 'rang', 'website', 'mojood', 'tor', 'khaas', 'tor', 'garmiyon', 'garmiyon', 'mozoon', 'paaya', 'mota', 'qisam', 'tawaqqa', 'sardiyoon', 'majmoi', 'tor', 'size', '']
531	MA305FA1KY528NAFAMZ	Mr. Sultan	3323	2018-11-21	4	1	yeh ke iss pack ko itni taiz raftaar aur itnay achay miyaar ke sath pahunchana bohat aaccha hai mujhe un ka har waqt pehna jana pasand hai yahan taq ke aaj aik pehna bhi hai mad of ki narmi se le kar silai taq woh sab achay hain	Positive	['pack', 'taiz', 'raftaar', 'miyaar', 'waqt', 'pasand', 'mad', 'narmi', 'silai', '']
532	ZA401FA0Q8JTSNAFAMZ	Arshad	941	2018-01-12	5	0	yeh rubber walay chamray ke jooton ki aik achi shakal hain kharch shuda raqam ki achi qeemat faraham karen	Positive	['chamray', 'shakal', 'kharch', 'raqam', 'qeemat', 'faraham']
533	MA305FA1KY528NAFAMZ	Azam	1160	2017-11-18	2	0	mein ne poooray shirts mein poori terhan se paaya safaid ki bajaye unhon ne mujhe peela bheja mein ne iss ke hukum ke baad deegar masnoaat ko khi se le kar taq order diya mein ne iss se pehlay un ka istaqbaal kya mein itna khush nahi hon	Neutral	['poooray', 'shirts', 'paaya', 'safaid', 'peela', 'masnoaat', 'order', 'pehlay', 'khush']
534	MA305FA1KY528NAFAMZ	Brig Khawar Latif Butt	1315	2016-08-06	4	1	bohat achh stuff cheeze kaamil size saaf silai aap ko itni susti qeemat mein aur kya chahiye mausam ke liye mozoon tane banay patli aur halka phulka aur mujhe waqai mein tamam rang pasand hain woh har roz pahannay ke liye behtareen hain size mere jism ko bilkul foot baithta hai aur cheeze itni snag hoti hain mein usay pehnana pasand karta hon yeh meri almaari mein aik acha izafah hai mein aam tor…	Negative	['stuff', 'cheeze', 'size', 'saaf', 'silai', 'susti', 'qeemat', 'mausam', 'mozoon', 'tane', 'patli', 'halka', 'phulka', 'tamam', 'rang', 'pasand', 'roz', 'pahannay', 'behtareen', 'size', 'jism', 'baithta', 'cheeze', 'pehnana', 'pasand', 'izafah', 'tor', 'androoni', 'libaas', 'tor', 'paseenay', 'jazb', 'kameez', 'zahir', 'munazzam']
535	AC743FA0FRC1KNAFAMZ	Ahmed	451	2018-11-28	4	0	woh naram hain aur unhein bhi ziyada sakhti mehsoos nahi hoti hai woh ke neechay pahannay ke liye behtareen qisam hain miyaar ke mutabiq woh par hain aur mujhe khushi hai ke iss par peeron se baghair kisi paiir ke sorakh mojood thay	Positive	['naram', 'sakhti', 'mehsoos', 'neechay', 'pahannay', 'behtareen', 'qisam', 'miyaar', 'khushi', 'baghair', 'paiir', 'sorakh', 'mojood']
536	OA551FA1D5IFSNAFAMZ	Mr Fahad	3291	2017-05-20	3	0	looks achi ha lakin quality achi nai h	Negative	['looks', 'quality']
537	DA290FA01AS88NAFAMZ	Chishti Sahib	1361	2019-08-26	5	0	bhot aala different style h aur comfortable b hai bhot	Positive	['style', 'comfortable']
538	DA290FA01AS88NAFAMZ	Erfan	1558	2019-01-08	5	0	bhot style wala hai haalat b achi hai	Positive	['style', 'haalat']
539	DA290FA01AS88NAFAMZ	Sikander	5264	2017-02-20	5	0	mujy kush ho style price sy	Neutral	['style']
540	DA290FA01AS88NAFAMZ	Tahir Qadri	5505	2019-04-09	4	0	mere waalid un se mohabbat karte hain yeh pahannay ke liye yeh bohat hi aram da aur pursukoon masnoaat hai woh yeh baqaidagi se p_hnta hai rang aur size wohi tha jo mein nay order kya tha woh usay bohat pasand karta hai aur se mutmaen hai yeh kaam se kaam aik hafta baad ke ehad ke muqablay mein pohanchaya gaya tha lekin iss ke miyaar par khara hai	Positive	['mohabbat', 'pahannay', 'aram', 'pursukoon', 'masnoaat', 'baqaidagi', 'phnta', 'rang', 'size', 'order', 'pasand', 'hafta', 'pohanchaya', 'miyaar']
541	DA290FA01AS88NAFAMZ	Kashan Shoukat	2593	2018-01-31	4	0	ka miyaar theek tha size aur fitting bilkul wohi thi jis ka mein nai hukum diya tha pitay ko bhi adjust karna aur rokna bhi asan tha chamray ka miyaar achha tha paidaar lagta tha display par online ki terhan hi nazar araha tha sab se ziyada yeh achi baat thi yeh bohat aram da aur pursukoon thay mujhe majmoi tor par numeral pasand hai	Positive	['miyaar', 'size', 'fitting', 'pitay', 'adjust', 'asan', 'chamray', 'miyaar', 'paidaar', 'display', 'online', 'aram', 'pursukoon', 'majmoi', 'tor', 'pasand']
542	DA290FA01AS88NAFAMZ	Bilal	1273	2019-12-17	1	1	ya chez uthny achi nai h jitne pic may thi	Negative	['pic']
543	OA551FA02JMCKNAFAMZ	does it matter?	6481	2019-02-28	1	0	bhot buri halt may h aur quailty b achi nai hai	Negative	['buri', 'halt', 'quailty']
544	OA551FA02JMCKNAFAMZ	M. Adnan Haider	2795	2018-05-08	5	0	sai cez h aur pic n real bilkul same hai	Negative	['pic', 'real']
545	OA551FA02JMCKNAFAMZ	Zulfiqar Shah	6200	2017-03-06	5	0	bhot aram di aur paky shoes hai	Neutral	['aram', 'shoes']
546	OA551FA02JMCKNAFAMZ	Muhee	3715	2018-07-12	4	0	pehlay pehal takleef mehsoos hoti hai lekin chand ghanton ke liye istemaal karen iss ke waqai aram da aur pursukoon har aik apna sasta keh raha hai oh nahi iss ki qeemat mein nahi hai	Negative	['pehlay', 'takleef', 'mehsoos', 'chand', 'ghanton', 'aram', 'pursukoon', 'sasta', 'qeemat', '']
547	OA551FA02JMCKNAFAMZ	majid	6830	2019-09-20	3	0	wahid sakht plastic se bana hai agar yeh wahid rubber se bana hota tu yeh bohat achay jootay hotay	Negative	['wahid', 'sakht', 'plastic', 'wahid', 'jootay']
548	GE310FA1HFXXGNAFAMZ	Usama	5741	2018-12-09	5	0	mein pichlle mahino se iss ka istemaal kar raha hon aur yeh bohat achchca hai lekin mere pitay ko tabdeel karne ki zaroorat hai aur mein notice nahi karta hon jahan se mein usay haasil karoon plz rehnuma ya mujhe sirf pita khareedne ka zareya faraham karta hai	Negative	['mahino', 'pitay', 'tabdeel', 'zaroorat', 'notice', 'haasil', 'rehnuma', 'khareedne', 'faraham']
549	GE310FA1HFXXGNAFAMZ	Imran Umer	2306	2018-12-05	5	0	herat angaiz device iss se meri sahet par nigrani ki jaanch partaal mein madad millti hai health monitor bohat si doosri cheezon mein shaamil hai jis mein notification center calling aur s aam s ki khususiyaat bhi shaamil hain	Positive	['herat', 'angaiz', 'device', 'sahet', 'nigrani', 'jaanch', 'partaal', 'madad', 'health', 'monitor', 'doosri', 'cheezon', 'shaamil', 'notification', 'calling', 'shaamil']
550	GE310FA1HFXXGNAFAMZ	Ali Mehdi	619	2019-03-22	4	0	yeh iss ke kaam karne ki terhan kaam karta hai tamam tareeqon se bilkul kaam hota hai aur yeh bhi dekhnay ke liye kaafi sajeela hai	Negative	['tamam', 'tareeqon', 'sajeela']
551	GE310FA1HFXXGNAFAMZ	Muhammad Anas	3516	2017-01-25	5	1	mein usay pasand karta hon itna aram da sajeela aur intahi durust honay ke douran istemaal karna itna asan hai mein ne usay neend aur chalne ke tareeqon ke liye khareeda lekin haqeeqat mein meri herat ke liye tamam tareeqon ka istemaal kar raha hon battery ki taweel muddat taq charge hota hai waqt aur aasani se charge ho jatay hain bohat achchca aik aur kharidari zaroor karen ge kuch bhi mil sakt…	Positive	['pasand', 'aram', 'sajeela', 'durust', 'douran', 'asan', 'chalne', 'tareeqon', 'haqeeqat', 'herat', 'tamam', 'tareeqon', 'battery', 'taweel', 'charge', 'waqt', 'aasani', 'charge', 'kharidari', 'hissa', 'chhootey', 'taqreeban', 'manual', 'asan']
552	GE310FA1HFXXGNAFAMZ	Ali	589	2016-02-15	5	0	mujhy ya acha laga baki sb sy	Neutral	[]
553	GE310FA1HFXXGNAFAMZ	Mohammad Asif	3215	2019-12-31	1	0	mera android ny pechan rha bralets	Neutral	['android', 'bralets']
554	VE812FA0E9WL4NAFAMZ	zafar abbas	7449	2016-02-07	4	0	mya chez achi h jsy may ny socha tha	Positive	[]
555	VE812FA0E9WL4NAFAMZ	Madiha	2920	2019-04-25	5	0	pehli baar mujhe aisi cheeze online mil gayeen iss qeemat mein miyaar dekhnay ke liye sirf herat zada rehna shukriya	Neutral	['cheeze', 'online', 'qeemat', 'miyaar', 'herat']
556	VE812FA0E9WL4NAFAMZ	imran khan	6677	2016-03-08	5	0	shukriya umdah miyaar aur durust size ka chart	Positive	['umdah', 'miyaar', 'durust', 'size', 'chart']
557	SU455FA18NJ18NAFAMZ	Muhammad Asif	3527	2017-08-27	5	0	achi ghari yeh qabil aetmaad hai aur qeemat mein bhi kaam hai mujhe yeh bohat pasand hai	Positive	['qabil', 'aetmaad', 'qeemat', 'pasand']
558	VE812FA0E9WL4NAFAMZ	Nimra	4046	2019-07-14	5	0	waqai mein yeh waistcoat khareedne mein khushi hai aur aindah bhi woh mazeed kharidari kere gi	Positive	['waistcoat', 'khareedne', 'khushi', 'kharidari']
559	VE812FA0E9WL4NAFAMZ	Nadia Afzal	3886	2019-07-29	5	0	mere shohar ko waqai mein un baniyan se ziyada order ka hukum day ga shukriya ke aap hamesha daraz ka behtareen kharidari ka tajurbah karte hain	Positive	['shohar', 'baniyan', 'order', 'day', 'behtareen', 'kharidari', 'tajurbah']
560	SU455FA18NJ18NAFAMZ	Abdul	164	2019-01-17	1	0	mein ne iss numeral ko kalay rang mein order kya tha lekin mein ne jo numeral haasil kya woh rangeen giray tha	Negative	['kalay', 'rang', 'order', 'haasil', 'rangeen']
561	SU455FA18NJ18NAFAMZ	Malik Hashim	2992	2017-02-13	4	1	mitril kaam miyaar ka hai jaisay plastic ka lock jaldi jalta hai waisay yeh iss qeemat par aik achi numeral hai	Positive	['miyaar', 'plastic', 'lock', 'jaldi', 'qeemat']
562	SU455FA18NJ18NAFAMZ	Adnan	344	2017-07-17	5	0	mein sirf pi si are mein kharidata hon lekin delivery charge toss munasib nahi hai lekin baichnay wala acha hai	Neutral	['charge', 'munasib', 'baichnay']
563	SI296FA1ECSJGNAFAMZ	MA	2855	2018-08-26	4	0	ya acha h apni price k lya	Positive	[]
564	SI296FA1ECSJGNAFAMZ	smc1	7261	2018-12-29	5	0	majmoi tor par miyaar ost hai lekin iss qeemat par bohat acha hai	Neutral	['majmoi', 'tor', 'miyaar', 'qeemat']
565	SI296FA1ECSJGNAFAMZ	ASK	102	2019-03-26	5	0	ya sb sy achi chez h jo daraz sy liy h may ny	Positive	[]
566	SI296FA1ECSJGNAFAMZ	Fahad	1603	2017-07-24	5	0	mein ne bohat aram da aur munasib qeemat khareedi aur mil gayi hai daraz ka shukriya	Positive	['aram', 'munasib', 'qeemat', 'khareedi']
567	OA551FA0YSCM4NAFAMZ	Saif	4730	2017-03-09	5	0	shukriya seller bhot hi acha product hai	Positive	['seller']
568	OA551FA0YSCM4NAFAMZ	Sohail	5294	2017-05-05	1	1	mein nai isi company ki masnoaat ke l company iss numeral ka order diya tha lekin jab mujhe ghar mein numeral mila tu company ke dono mukhtalif numeral mil gaye	Negative	['masnoaat', 'order', 'mukhtalif']
569	OA551FA0YSCM4NAFAMZ	Ali Sajjad	631	2019-05-05	3	0	un kamon ko tarteeb dainay ke jaisa ke mein nai iss ki tawaqqa ki thi yeh masnoaat ki tafseel par jo tasweeron mein dukhaay jarahay hain iss se waqai mukhtalif hain woh iss se kahin ziyada mukhtalif hain ke iss nai un ke majmoi tajarbay ko zaya kardiya un ke baarey mein sirf aik achi cheez yeh hai ke mawaad ka miyaar itminan bakhash hai ke silai barqarar hai aur woh aram da aur pursukoon hain lek…	Positive	['kamon', 'tarteeb', 'tawaqqa', 'masnoaat', 'tafseel', 'tasweeron', 'dukhaay', 'mukhtalif', 'kahin', 'mukhtalif', 'majmoi', 'tajarbay', 'kardiya', 'miyaar', 'itminan', 'bakhash', 'silai', 'barqarar', 'aram', 'pursukoon', 'masnoaat', 'tafseel', 'tasweer']
570	OA551FA0YSCM4NAFAMZ	Abdullah Khawar	243	2020-01-28	5	0	aur issues k la iss num p rabta kry bhot ach h product	Neutral	['issues']
571	MA305FA0EID50NAFAMZ	Ali	589	2016-06-20	1	0	afsoosnaak miyaar bohat se mayoos hue rang pehlay dhoney ke baad khatam ho jatay hain nah khareedain	Negative	['afsoosnaak', 'miyaar', 'mayoos', 'rang', 'pehlay', 'dhoney', 'khatam']
572	MA305FA0EID50NAFAMZ	Mirza Daniyal Sameem Baig	3165	2017-07-20	5	0	mein kharidari se poori terhan mutmaen hon kyunkay yeh tank sab se oopar herat angaiz tha aur yeh mere liye bhi bilkul foot hain tu meri taraf se koi shikayat nahi hai yeh rang mein aik jaisay thay aur design bhi wohi thay jaisay tasweer mein dekha gaya tha size bhi durust thay bohat hi aram da tank tops	Positive	['kharidari', 'tank', 'herat', 'angaiz', 'taraf', 'shikayat', 'rang', 'design', 'tasweer', 'dekha', 'size', 'durust', 'aram', 'tank', 'tops']
573	MA305FA0EID50NAFAMZ	Zahra Faisal	6056	2017-07-22	1	0	se mukammal tor par mayoosi hui rang taiz nahi hain pehlay dhoney ke rang blid surkh rang ki patti nai safaid paiir ko kharab kya aur neelay rang nai safaid patti ko kharab kardiya ziyada tar masnoaat jo mein nai ke zareya istemaal ki hain un mein rangon ka aik hi masla tha mein iss baichnay walay se kabhi order karoon ga paison ka zeyaa aur khareedne ke qabil nahi	Negative	['mukammal', 'tor', 'mayoosi', 'rang', 'taiz', 'pehlay', 'dhoney', 'rang', 'rang', 'safaid', 'paiir', 'neelay', 'rang', 'safaid', 'kardiya', 'masnoaat', 'masla', 'baichnay', 'order', 'paison', 'khareedne', 'qabil', '']
574	MA305FA0EID50NAFAMZ	Mudassir	3470	2017-07-26	4	0	yeh aasteenein aisi qisam ki hain jo garmiyon mein sooraj se lutaf uthaati hain woh halkay achi fitting aur rangeen bhi waqai purkashish hain iss ke sath sath iss ke nmonon aur saya bhi mein usay kabhi kabhi androoni ki terhan p_hnta hon aur jim mein jatay waqt ya khail khailtay waqt bhi istemaal karta hon yeh bohat bareek silai aur pahannay mein raahat bakhash hai	Positive	['aasteenein', 'qisam', 'garmiyon', 'lutaf', 'fitting', 'rangeen', 'purkashish', 'saya', 'androoni', 'phnta', 'jim', 'waqt', 'khail', 'waqt', 'bareek', 'silai', 'pahannay', 'raahat', 'bakhash', '']
575	OA551FA1B35TGNAFAMZ	shafiq	7188	2018-11-27	1	0	kkhuda ka shukar hai ke unhon nai chamray ka lafz hazf kar diya hai mein nai hukum diya ke jab qeemat ho mein nai usay sasta samgha agar yeh chamray mein hai tu pouncha yeh chamra nahi tha mujhe khredar ko nazar andaaz karne se bachney ke l leather chamray ka lafz wahan se hataane ki shikayat hai kharab miyaar	Positive	['shukar', 'chamray', 'lafz', 'qeemat', 'sasta', 'chamray', 'andaaz', 'leather', 'chamray', 'lafz', 'wahan', 'shikayat', 'miyaar']
576	OA551FA1B35TGNAFAMZ	Arshad Ahmed Shad	942	2018-03-25	4	1	mardon ke liye yeh jotiyan tawaquaat ke mutabiq bilkul theek theen kyunkay yeh tasweer mein dikhayi dainay walay ki terhan nazar atay hain aur mein iss design aur iss haqeeqat se kaafi mutmaen hon ke yeh din bhar pahannay mein kitne aram da aur pursukoon thay	Positive	['tawaquaat', 'tasweer', 'dikhayi', 'design', 'haqeeqat', 'din', 'bhar', 'pahannay', 'aram', 'pursukoon']
577	OA551FA1B35TGNAFAMZ	Ebad	1505	2017-12-09	1	0	barah karam nihayat hi bohat kharab miyaar ko khareedne ke liye	Positive	['miyaar', 'khareedne']
578	OA551FA1B35TGNAFAMZ	Adnan191	367	2018-01-16	1	0	barah karam usay kharedne ki koshish nah kar	Negative	['koshish']
579	OA551FA1B35TGNAFAMZ	Muhammad shehzad	3699	2018-12-10	4	1	numeral ka miyaar behtareen hai lekin mein ne size ko order kya lekin mein ne size wusool kya jo nahi hai iss ki bajaye unhon ne delivery sleep par size ka zikar kya	Negative	['miyaar', 'behtareen', 'size', 'order', 'size', 'wusool', 'sleep', 'size']
580	OA551FA1B35TGNAFAMZ	B-k Tanoli	1190	2019-01-07	4	1	mein un jootay se qadray mayoos tha pehlay mein ne aik size ka order diya tha jo mere liye thora chhota tha kyunkay woh daraz par dastyab nahi they koi bhi jo un jootay ki silai istemaal karne ke aik mahinay ke baad bahar arhha hai jo qadray mayoos kin hai agarchay woh aram se hain	Negative	['jootay', 'qadray', 'mayoos', 'pehlay', 'size', 'order', 'chhota', 'dastyab', 'jootay', 'silai', 'mahinay', 'qadray', 'mayoos', 'aram']
581	OA551FA1B35TGNAFAMZ	Mubashar Hassan	3452	2017-06-03	5	1	mein un jooton se poori terhan mutmaen tha un ka design vaqata umdah aur asan hai saadgi aur miyaar achh aa hai aur qeemat bhi waqai mohazab hai yeh bhi aram da aur pursukoon hain lehaza mein yeh mukammal number dun ga	Positive	['design', 'vaqata', 'umdah', 'asan', 'miyaar', 'qeemat', 'aram', 'pursukoon', 'mukammal', 'number']
582	OA551FA1B35TGNAFAMZ	Wajeeh Ur Rehman	5848	2017-01-26	2	0	yeh achay lagtay hain lekin un ke baray mein sirf aik hi cheez achi hai un ke baray mein afsoosnaak baat yeh hai ke woh waqai aram se nahi hain jaisa ke aap un ki tawaqqa karen ge woh meri raye mein sirf ostan jootay hain yeh bhi acha nahi tha	Positive	['baray', 'baray', 'afsoosnaak', 'aram', 'tawaqqa', 'jootay']
583	PE859TB17HA1ONAFAMZ	Ali	589	2016-06-22	5	0	mein ny mahinay pehlay kharidari ke muqablay mein miyaar mein bohat behtar banaya tha iss baichnay walay ny un ke miyaar mein bohat behtari layi hai par jootay ke sath mukammal tor par posheeda silai aur miyaar bhi achchhaa hai	Positive	['mahinay', 'pehlay', 'kharidari', 'miyaar', 'banaya', 'baichnay', 'miyaar', 'behtari', 'jootay', 'mukammal', 'tor', 'posheeda', 'silai', 'miyaar']
584	PE859TB17HA1ONAFAMZ	Anaum	802	2017-04-06	1	0	masnoaat kaam miyaar ki hai pehlay istemaal par phataa sun hwa sifarish nahi ki jati hai	Negative	['masnoaat', 'miyaar', 'pehlay', 'phataa', 'sifarish']
585	PE859TB17HA1ONAFAMZ	Naveed	3979	2019-01-30	5	0	mujhe dar tha ke mujhe dhoka ho sakta hai lekin yeh waqai aram da aur pursukoon jarabay hain jin ko ke sath pehna jata hai mein apne liye aik aur pack order karoon ga	Negative	['dhoka', 'aram', 'pursukoon', 'jarabay', 'pack', 'order', '']
586	VE812FA0MKIQONAFAMZ	osama	7022	2017-05-29	4	1	mujhe pasand hai ke tang ka ilaqa lamba kaisay hai sukoon ki satah achi hai lekin andar ka label qadray pareshan kin hai size mein jo order karta hon iss se bara hota hai lehaza agli baar size chhootey order kere ga	Negative	['pasand', 'tang', 'ilaqa', 'lamba', 'kaisay', 'sukoon', 'label', 'qadray', 'pareshan', 'size', 'order', 'bara', 'size', 'chhootey', 'order']
587	VE812FA0MKIQONAFAMZ	Usama H.	5744	2017-01-10	5	0	bilkul isi terhan jaisay woh tasweer mein nazar atay hain agarchay khalis roi nahi	Neutral	['tasweer', 'khalis']
588	VE812FA0MKIQONAFAMZ	Rabia Abdullah	4295	2018-12-09	5	0	umdah mein poori terhan mutmaen hon aap ka shukriya daraz	Positive	['umdah']
589	MA305FA1KY528NAFAMZ	Kamran	2568	2016-12-23	4	1	majmoi tor par mein tea shirts se mutmaen hon mawaad aur miyaar taap classe hain aur woh bhi pahannay mein bohat aram se hain mujhe yeh pasand hai aur dosaron ko bhi sifarish karoon ga khush	Positive	['majmoi', 'tor', 'tea', 'shirts', 'miyaar', 'pahannay', 'aram', 'pasand', 'dosaron', 'sifarish', 'khush']
590	MA305FA1KY528NAFAMZ	Arsalan	929	2019-01-29	1	0	pehlay shirts ka miyaar appeal nahi karta tha kyunkay woh website par dukhaay gaye miyaar se mutabqat nahi rakhtay thay mein ne iss baat ki manzoori nahi di neez tane banay aisa lagta hai jaisay mein usay pahannay ki koshish karke hi iss ko phaar sakta hon barah karam miyaar bhejnay se pehlay jaanch karen	Positive	['pehlay', 'shirts', 'miyaar', 'appeal', 'website', 'dukhaay', 'miyaar', 'mutabqat', 'tane', 'pahannay', 'koshish', 'miyaar', 'pehlay', 'jaanch']
591	MA305FA1KY528NAFAMZ	Jamshed	2439	2016-04-28	2	0	aik kameez pehlay hi phati hui thi lehaza sirf shirts pahannay ke qabil theen har kameez mein aik hi maday nahi hotay hain baqi du se behtar miyaar ke thay	Positive	['kameez', 'pehlay', 'phati', 'shirts', 'pahannay', 'qabil', 'kameez', 'maday', 'miyaar']
592	MA305FA1KY528NAFAMZ	Abdullah Mujahid	245	2019-02-25	3	1	jitna acha tha mein ne socha tha ke yeh qmisin hon gi mein iss se ziyada khush nahi hon iss ki wajah yeh hai ke tea shirt fitting mein itni achi baat nahi hai woh aik size ki terhan khud ko mehsoos karte hain aur ke ird gird bohat tang mehsoos karte hain rang aur sab kuch waqai achh aa hai lekin size ke muamlay ki wajah se yeh sab shirts izafi lais lagti hain	Positive	['qmisin', 'khush', 'wajah', 'tea', 'fitting', 'size', 'mehsoos', 'gird', 'tang', 'mehsoos', 'rang', 'size', 'wajah', 'shirts', 'izafi', 'lais']
593	MA305FA1KY528NAFAMZ	M noman Anwar	2782	2016-05-27	5	1	tane banay bohat arram da aur pursukoon mehsoos karte hain mujhe un par laganay mein aasani hoti hai inhen aik hi rangon mein mil gaya jo yahan dukhaay ge hain woh paanchon bilkul isi size mein aeye thay jis ki mein chahta tha qeemat ke liye yeh aik aaccha soda hai	Negative	['tane', 'pursukoon', 'mehsoos', 'aasani', 'dukhaay', 'size', 'chahta', 'qeemat', 'soda']
594	FI209SP11QRMSNAFAMZ	Syed Kashif Karim	5406	2017-06-09	4	0	yeh body shapar itna shandaar hai ke yeh aap ke ko kameez ke neechay itna acha lag raha hai ke aisa lagta hai ke aap ke paas aik behtareen shakhsiyat hai iss ka maqsad vaqata well uch well hai aur yeh achay miyaar ke tane banay se bana hai behtareen hissa yeh hai ke tane banay ka mawaad bohat naram hai aur yeh aap ko bilkul bhi jalan nahi karta hai aur nihayat aram da hai	Positive	['body', 'shapar', 'shandaar', 'kameez', 'neechay', 'behtareen', 'maqsad', 'vaqata', 'miyaar', 'tane', 'behtareen', 'hissa', 'tane', 'naram', 'jalan', 'aram']
595	MA305FA1KY528NAFAMZ	Naveed Akhter	3983	2019-04-11	4	1	mein ne daraz aur bohat si doosri cheezon se bhi bohat si shirts mngwayi hain tamam shirts mein se yeh pack behtareen hai iss ka aik intahi aram da aur pursukoon packet jo mujhe mil sakta tha aur woh nahi karte hain mujhe ya tu dhoop mein bohat ziyada garam banayen tamam tane banay ki halki phlki wajah se tamam paanch rang waqai purkashish hain aur ya tu dhotay waqt un ka haath nahi khatay hain m…	Positive	['doosri', 'cheezon', 'shirts', 'tamam', 'shirts', 'pack', 'behtareen', 'aram', 'pursukoon', 'packet', 'dhoop', 'garam', 'tamam', 'tane', 'halki', 'wajah', 'tamam', 'rang', 'purkashish', 'waqt', 'haath', 'silai', 'nuqs', 'mehsoos', 'munasib', 'kameez', 'androoni', 'libaas', 'pahannay', 'miyaar', 'tawaqqa', 'farahmi', 'mukammal', 'tor']
596	MA305FA1KY528NAFAMZ	Mohammed Shahzaib	3232	2018-08-17	4	1	yeh qmizin itni kaam qeemat par ayen lekin mein ne inhen miyaar mein kahin ziyada achi terhan se wusool kya cheeze patli aur saans lainay wali hain mujhe un shirts ko laganay mein bohat kaam lag raha hai site ke jaisa hi rangeen order mila yeh sab kuch bohat hi roshan hai aur lagta hai ke achay miyaar ka hai size aur fitting mere jism par misali tor par ayen	Positive	['qmizin', 'qeemat', 'miyaar', 'kahin', 'wusool', 'cheeze', 'patli', 'shirts', 'site', 'rangeen', 'order', 'roshan', 'miyaar', 'size', 'fitting', 'jism', 'misali', 'tor']
597	DA290FA01AS88NAFAMZ	arslan ashraf	6356	2018-01-27	4	0	mein abhi aik mah se yeh sandle istemaal kar raha hon aur mujhe yeh kehna para hai ke un ke baarey mein tajurbah bohat achchca chal raha hai kyunkay mujhe yaqeen hai ke yeh miyaar mein bohat achay hain aur pahannay mein bhi bohat hi aram da hain size un ke liye behtareen tha mein aur mujhe umeed hai ke yeh ziyada der taq rahen ge kyunkay yeh bhi sajeela dikhayi dete hain	Positive	['sandle', 'tajurbah', 'yaqeen', 'miyaar', 'pahannay', 'aram', 'size', 'behtareen', 'umeed', 'sajeela', 'dikhayi']
598	DA290FA01AS88NAFAMZ	Gulraiz Khan	1908	2016-09-03	3	0	achi baat hai tu mein waqai iss se mutmaen nahi hon iss miyaar ka miyaar bilkul achcha nahi tha silai un sandle ka bunyadi masla tha silai mukhtalif jagah se aa rahi hai mujhe un ko sahih tareeqay se istemaal karne ke l inhen tankay lagana parre ga	Positive	['miyaar', 'miyaar', 'silai', 'sandle', 'masla', 'silai', 'mukhtalif', 'tareeqay', 'tankay']
599	DA290FA01AS88NAFAMZ	Amjad afzal	753	2020-01-01	1	0	mein un would land land sandle ke miyaar ko dekh kar bohat mayoos aur pareshan sun hwa tha jo mujhe pouncha tha bil akhir mein ny iss ke suroor se kabhi bhi kisi kitaab ka faisla nahi kya iss nazriya par yaqeen kya jaisa ke jootay ghair mamooli lagey bilkul isi terhan jo ishtihar diya gaya tha iss waqt taq jab taq mein vaqata them un par hi nahi tha mujhe yeh ehsas ho gaya tha ke yeh jootay kisi …	Negative	['land', 'land', 'sandle', 'miyaar', 'mayoos', 'pareshan', 'yaqeen', 'jootay', 'mamooli', 'ishtihar', 'waqt', 'vaqata', 'jootay', 'maqsad', 'faida', 'miyaar', 'pahannay', 'minute', 'paiir', 'paiir', 'wahid', 'tor', 'taraf', 'paun', 'taraf']
600	DA290FA01AS88NAFAMZ	Ansar Hassan	853	2019-03-07	3	0	mayoosi ki asal wajah chunkay yeh meri eid ki kharidari thi iss ki wajah se yeh chamray ke nishaan ke nishaan ke sath kharabi se kuchal di gayi thi andaza karen ke yeh tea si s koryir ki ghalti hai	Positive	['mayoosi', 'asal', 'wajah', 'kharidari', 'wajah', 'chamray', 'nishaan', 'nishaan', 'kharabi', 'andaza', 'tea', 'ghalti']
601	DA290FA01AS88NAFAMZ	Wajeeh Ur Rehman	5848	2019-06-04	2	0	un jooton ke miyaar ke baarey mein mera tajurbah ostan raha hai un jootay ke baarey mein baat yeh hai ke woh bilkul waqai aram da aur pursukoon nahi thay halaank mere peeron ko bhi takleef nahi pohanchi thi lekin mujhe iss qisam ki ziyada tawaquaat theen yeh jootay jo nahi mile thay	Negative	['miyaar', 'tajurbah', 'jootay', 'aram', 'pursukoon', 'takleef', 'qisam', 'tawaquaat', 'jootay']
602	DA290FA01AS88NAFAMZ	Akram Tak	571	2018-07-04	5	0	mein inhen bohat pasand karta hon woh tasweer mein nazar anay walay se behtar hain	Positive	['pasand', 'tasweer', '']
603	DA290FA01AS88NAFAMZ	Zeeshan	6135	2017-07-15	5	0	yeh acha lagta hai acha bhi lagta hai aur bohat halka wazan aur naram bhi mukhtasir yeh ke yeh aik achi numeral hai	Positive	['halka', 'wazan', 'naram', 'mukhtasir']
604	GR048FA1KF9CSNAFAMZ	M. Hashir	2802	2018-02-17	5	0	waqt par masool sun hwa achay miyaar ka mawaad jo aik khanaay mein pack kya gaya hai	Neutral	['waqt', 'masool', 'miyaar', 'pack']
605	GR048FA1KF9CSNAFAMZ	Agha G	414	2018-08-16	3	0	mawaad theek hai behtareen nahi barray size ka order den barray aur dosray aik darmiyanay darjay mein haasil karen majmoi tor par yeh order star ka mustahiq hai	Negative	['behtareen', 'barray', 'size', 'order', 'barray', 'dosray', 'darmiyanay', 'haasil', 'majmoi', 'tor', 'order', 'mustahiq']
606	GR048FA1KF9CSNAFAMZ	Osama	4147	2017-06-23	3	0	darmiyanay size ka order diya aur iss par mohar walay size ke label ke sath chhota size mila	Negative	['darmiyanay', 'size', 'order', 'mohar', 'size', 'label', 'chhota', 'size']
607	OA551FA02JMCKNAFAMZ	Usman	5754	2019-10-17	1	0	bhot bura hai aram di b nai h	Negative	['aram']
608	OA551FA02JMCKNAFAMZ	bilal akram	6431	2017-01-06	2	0	buri kharab chez h jo pic may tha wsa nai h	Negative	['buri', 'pic']
609	OA551FA02JMCKNAFAMZ	nain shah	6971	2017-07-08	4	0	thora lez ka masla h baki sb thay k hai	Neutral	['masla']
610	OA551FA02JMCKNAFAMZ	Mrs urooj	3376	2016-02-28	5	0	iss ka aram da aur pursukoon nazar aur sardiyoon ki qeemat ke liye behtareen uch quality miyaar hai herat angaiz shukriya daraz	Positive	['aram', 'pursukoon', 'sardiyoon', 'qeemat', 'behtareen', 'quality', 'miyaar', 'herat', 'angaiz']
611	OA551FA02JMCKNAFAMZ	Sheikh Jalil	5188	2018-08-21	4	0	mein istemaal karta hon ke yeh mausam sarma mein butt ka rang halka hai lehaza mere shehar mein qabil feham nahi hai warna jootay bohat aram da hi	Positive	['mausam', 'rang', 'halka', 'qabil', 'jootay', 'aram']
612	OA551FA02JMCKNAFAMZ	Rumman.	4545	2019-09-23	5	0	jootay waqai bohat achay thay aur farahmi ain waqt par thi shukriya	Positive	['jootay', 'farahmi', 'waqt']
613	SU455FA18NJ18NAFAMZ	Zain Bhatti	6071	2019-12-12	3	0	yeh cheeni ki teesri classe zeli mayaari masnoaat ki bohat ghatiya jootay hai jab aap usay dekhen ge tu aap iss se nafrat karen ge	Negative	['cheeni', 'mayaari', 'masnoaat', 'jootay', '']
614	SU455FA18NJ18NAFAMZ	Aslam	1041	2016-11-16	5	0	khelon ki nigah se dekhte hi dekhte yeh zindah hai	Positive	['khelon', 'nigah', 'zindah']
615	SU455FA18NJ18NAFAMZ	Ahmad	430	2017-06-26	3	0	kya koi mujhe waqt adjust karne ka tareeqa bta sakta hai musalsal ghalat waqt dena	Neutral	['waqt', 'adjust', 'tareeqa', 'ghalat', 'waqt']
616	SU455FA18NJ18NAFAMZ	Ansar	852	2018-04-10	1	0	mein iss ghari ko kharidata hon jo mein ne adjust kya hai ke phir mein ne watch belt mein lock daal diya baad qismati se lock break hai	Neutral	['adjust', 'watch', 'belt', 'lock', 'qismati', 'lock', 'break']
617	ZE011FA0A1YOGNAFAMZ	Ahmed	451	2018-05-16	4	0	acha patlon wazan mein halka aram da aur pursukoon aur neend ke libaas ke liye bohat acha hai ziyada wazan walay larkoon ke liye nahi	Positive	['patlon', 'wazan', 'halka', 'aram', 'pursukoon', 'libaas', 'wazan']
618	ZE011FA0A1YOGNAFAMZ	paras mughal	7028	2019-10-19	4	0	bohat achi kharidari kyunkay iss mein se tamam patlon neend ke libaas ke liye bohat achay thay kyunkay tane banay mohazab tha aur patteren aur print aur design bhi itminan bakhash tha mein sirf iss baat se mutmaen hon ke mujhe qeemat par kya mila	Positive	['kharidari', 'tamam', 'patlon', 'libaas', 'tane', 'patteren', 'print', 'design', 'itminan', 'bakhash', 'qeemat']
619	ZE011FA0A1YOGNAFAMZ	Qasim Junaid	4240	2018-02-12	1	0	mujhe aik intahi mayoos kin tajurbah mila hai kyunkay jab mein ny dekha ke yeh muft size mein thay tu mein ny inhen hukum diya tha lekin yeh azadana size ki nahi thi jis ki mujhe tawaqqa thi lehaza mein ny aik baar usay pehna tha aur iss ke baad ab pahannay ke qabil bhi nahi thay iss tajarbay ke sath mein ny yeh raye di hai ke iss se behtar yeh hai ke woh shakhs khud market jaakar ashya ko kharid…	Negative	['mayoos', 'tajurbah', 'dekha', 'muft', 'size', 'size', 'tawaqqa', 'pahannay', 'qabil', 'tajarbay', 'shakhs', 'market', 'kharidari', 'pehlay', 'tafheem', 'haasil', 'maloom']
620	VE812FA0SL9ZCNAFAMZ	USAMA	5648	2018-12-07	5	0	baksron ka tane banay sirf herat angaiz aur aram da aur pursukoon hai aala miyaar ki masnoaat ka shukriya daraz pk	Positive	['tane', 'herat', 'angaiz', 'aram', 'pursukoon', 'miyaar', 'masnoaat']
621	OA551FA1B35TGNAFAMZ	saad	7102	2016-05-13	3	0	uthn ach ny h jitna may ny socha tha	Negative	[]
622	OA551FA1B35TGNAFAMZ	Ghazala Durrani	1859	2017-05-16	4	0	mein vaqata this iss numeral ke miyaar se bohat mutmaen tha un ki takmeel aur design bohat acha tha kyunkay aap ko dosray jootay mein iss terhan ki saadgi nahi millti jootay achh and aur qadray aram se thay theek hai un ki qeemat susti thi jo majmoi tor par itminan bakhash safar ka baais banti hai	Negative	['vaqata', 'miyaar', 'takmeel', 'design', 'dosray', 'jootay', 'jootay', 'qadray', 'aram', 'qeemat', 'susti', 'majmoi', 'tor', 'itminan', 'bakhash']
623	OA551FA1B35TGNAFAMZ	Malik	2987	2017-01-17	3	0	mein ne iss numeral ka istemaal kya hai design behtar hai qeemat ke mutabiq miyaar behtar hai	Positive	['design', 'qeemat', 'miyaar']
624	OA551FA1B35TGNAFAMZ	syed Ali Abdullah Rizvi	7300	2017-09-26	2	0	theek hai mein ne haal hi mein un jooton ko apne nafs ke liye order kya tha aur mere liye yeh vaqata aik bohat aaccha tajurbah raha hai jo jootay pohanchaya gaya woh bilkul waisa hi tha jitna ki tafseel mein dekhaya gaya hai mawaad ka miyaar bohat aaccha tha aur jootay waqai thay naram aur aram da aur pursukoon hai aur woh mujhe bilkul foot bhi rakhtay hain lehaza yeh aik bohat aaccha tajurbah tha	Positive	['order', 'vaqata', 'tajurbah', 'jootay', 'pohanchaya', 'tafseel', 'miyaar', 'jootay', 'naram', 'aram', 'pursukoon', 'tajurbah']
625	OA551FA1B35TGNAFAMZ	Zulfiqar	6197	2016-09-09	1	0	jootay bohat kaam miyaar ke hain aur asal mein tasweer mein nahi dekhaya gaya tha bas usay du baar pehna aur phataa bura tajurbah	Negative	['jootay', 'miyaar', 'asal', 'tasweer', 'phataa', 'tajurbah']
626	OA551FA1B35TGNAFAMZ	Sayed Tariq	4950	2016-10-03	3	0	yeh aik jaisay nahi hain jaisa ke un ki tashheer ki jarahi hai mein maadi miyaar ke sath sath un jootay ke design se bhi mutmaen nahi hon halaank sara din pahannay mein tanha hi aram da hai iss ki takmeel ka fuqdaan hai	Positive	['tashheer', 'miyaar', 'jootay', 'design', 'din', 'pahannay', 'aram', 'takmeel']
627	OA551FA1B35TGNAFAMZ	Sohail Mateen	5298	2017-07-07	5	0	theek hai iss ka miyaar mohazab hai mein ny yeh pehna nahi hai lekin yeh waqai achay lagtay hain un ke baray mein design behtareen cheez hai aap ko yeh makhsoos loufer design nahi milta jo un dinon har aik p_hnta hai lekin aap ko qadray achh better faida milta hai jooton ke miyaar ko mehsoos karne aur thori der ke liye pahannay se achcha lagta hai istehkaam mujhe iss ke baray mein waqai yaqeen na…	Positive	['miyaar', 'baray', 'design', 'behtareen', 'loufer', 'design', 'dinon', 'phnta', 'qadray', 'faida', 'miyaar', 'mehsoos', 'thori', 'pahannay', 'baray', 'yaqeen', 'munasib', 'tareeqay', 'taweel', 'yaqeen', 'shlwar', 'kameez']
628	OA551FA1B35TGNAFAMZ	Ali Chuhan	601	2018-03-03	2	0	mere aas paas tan parre hue hain lehaza mein ne kuch mukhtalif cheez chahi thi lehaza mein ne apne liye yeh kalay order kiye aur yeh aik khobsorat mohazab tajurbah raha un ka miyaar waqai kharab hai qeemat meri raye mein waqai susti hai lekin un jootay ka mawaad qabil reham hai yeh waqai itna aram da nahi hai jaisay aap ko kuch premium jooton mein milta ho aur iss se aap ke peeron ko takleef hoti…	Negative	['mukhtalif', 'kalay', 'order', 'khobsorat', 'tajurbah', 'miyaar', 'qeemat', 'susti', 'jootay', 'qabil', 'reham', 'aram', 'premium', 'takleef', 'wajah', 'khush', 'tor', 'shlwar', 'kameez', 'phnta', 'munasib', 'miyaar', 'zurori', 'tasweer', 'haasil']
629	MA563FAEPDPLNAFAMZ	sami	7146	2019-06-22	4	1	size acha hai fitting achi hai taham mawaad stir hai	Positive	['size', 'fitting']
630	MA305FA138634NAFAMZ	Boy	1313	2017-03-09	5	0	kuch jaizay iss kaam qeemat wali masnoaat ke liye durust nahi hain paanch sitaron ke mustahiq hain	Positive	['qeemat', 'masnoaat', 'durust', 'sitaron', 'mustahiq']
631	MA305FA138634NAFAMZ	Ateeq Ahmed	1070	2017-07-25	5	0	aram da aur pursukoon aur khobsorat check design munasib qeemat	Positive	['aram', 'pursukoon', 'khobsorat', 'check', 'design', 'munasib', 'qeemat']
632	AC596FA01MBLANAFAMZ	Ahsan	486	2018-11-29	5	0	mere werzish ke maloomat ke liye sirf kaamil bilkul mohabbat	Neutral	['werzish', 'maloomat', 'mohabbat', '']
633	MA305FA138634NAFAMZ	T	5470	2016-04-23	4	0	aram da aur pursukoon istemaal ke liye naram roi ka samaan acha naazuk kmfrt	Positive	['aram', 'pursukoon', 'naram', 'samaan', 'naazuk', 'kmfrt']
634	MA305FA138634NAFAMZ	Rana Zeeshan	4397	2017-02-20	5	0	theek hai iss qeemat ke baray mein mein yeh kahoon ga ke mein poori terhan mutmaen hon miyaar itna bara nahi ho sakta hai lekin iss qeemat ke baray mein aap waqai behas nahi kar saktay hain isi wajah se mein vaqata product iss numeral se mutmaen hon mein ne un mein se sirf aik ko hi dhula hai nateeja se mayoos nahi sun hwa	Negative	['qeemat', 'baray', 'miyaar', 'bara', 'qeemat', 'baray', 'wajah', 'vaqata', 'nateeja', 'mayoos']
635	MA305FA138634NAFAMZ	Hassan Raza Khan	2130	2017-04-12	1	0	aik haftay ke taweel intzaar ke baad ghalat ki farahmi jo kuch mujhe mila iss ka kharab miyaar daraz ko iss mein check aan balance rakhna chahiye	Negative	['haftay', 'taweel', 'intzaar', 'ghalat', 'farahmi', 'miyaar', 'check', 'balance', 'rakhna']
636	MA305FA138634NAFAMZ	Hasham Khan	2095	2018-10-13	4	0	yeh patlon aasani se jatay hain samaan pahannay mein itna aram da hota hai chahey aap usay sonay ke l wear pehantay ho ya phir aram se latak rahay ho tane banay halkay aur cheenthay hotay hain un patlon ka size theek hai lekin makhi ka size bohat chhota hai aur silai mein thori behtari ki bhi zaroorat hai	Positive	['patlon', 'aasani', 'samaan', 'pahannay', 'aram', 'wear', 'aram', 'latak', 'tane', 'patlon', 'size', 'size', 'chhota', 'silai', 'thori', 'behtari', 'zaroorat']
637	TH281FA16STEWNAFAMZ	Azain Tariq	1159	2018-10-20	3	0	theek hai mein neh haal hi mein iss ka hukum diya tha aur mein waqai mein iss baniyan se mutmaen nahi tha ki wazahat neh daawa kiya hai ke iss neh aik baniyan banaya hai jis ki wajah se mein neh iss par koshish ki aur wahan mojood nahi iss ka koi asar nahi parta yeh aik mamooli baniyan ki terhan kaam karta hai aur iss slmng cheez ke baarey mein jo mein nahi sochta ke yeh achcha kaam karta hai lek…	Positive	['neh', 'baniyan', 'wazahat', 'neh', 'neh', 'baniyan', 'banaya', 'wajah', 'neh', 'koshish', 'wahan', 'mojood', 'asar', 'mamooli', 'baniyan']
638	MA305FA138634NAFAMZ	ARG	95	2017-10-27	1	0	kaam miyaar ka mawaad aur lachak dar kamar baind ke liye kaam se kaam lamhay tak mumkin ho	Neutral	['miyaar', 'lachak', 'kamar', 'baind']
639	MA305FA138634NAFAMZ	Abdur Rehman	266	2019-02-27	1	0	intahi mayoos kin tajurbah hai aur mein kharidari se mutmaen hon kyunkay mein nai socha tha ke yeh mujhe sukoon aur aasani faraham karen ge aur yeh bilkul mayoos kin tha un ke dhaagay thora sa istemaal ke baad samnay ana shuru hue aur yeh bilkul bekar ho gaye aur mil gaye phataa sun hwa aur na qabil bardasht	Negative	['mayoos', 'tajurbah', 'kharidari', 'sukoon', 'aasani', 'faraham', 'mayoos', 'dhaagay', 'samnay', 'bekar', 'phataa', 'qabil', 'bardasht']
640	TH281FA0NK5OSNAFAMZ	Moeez	3206	2018-12-23	3	0	rangat pasand hai aur darja bandi kaam karne ki wajah iss par ashaat shuda samaan tha yeh bilkul aisay hi tha jaisay kisi gulu se chaspan kya gaya tha aur usay aik baar pahannay ke baad tank se utarna shuru sun hwa	Negative	['rangat', 'pasand', 'darja', 'bandi', 'wajah', 'samaan', 'aisay', 'gulu', 'pahannay', 'tank']
641	DA290FA01AS88NAFAMZ	Sana	4868	2016-03-17	1	0	hukum diya rang nahi pouncha tha miyaar bilkul bhi acha nahi tha	Neutral	['rang', 'miyaar']
642	DA290FA01AS88NAFAMZ	Ghazzanfar Mustafa	1864	2019-06-01	5	0	bura ny h iss keemat may	Negative	['keemat']
643	DA290FA01AS88NAFAMZ	Muhammad Aqeel	3520	2016-03-18	1	0	abhi meri kharidari hogayi barah karam usay nah khareedain kyunkay yeh aik jaisi nahi hai wahid rang iss ka halka brown nahi hai mawaad ke qareeb bhi nahi mein abhi lout liya aa	Negative	['kharidari', 'wahid', 'rang', 'halka', 'brown', 'qareeb']
644	DA290FA01AS88NAFAMZ	musadiq	6944	2019-04-26	2	0	iss shai ko dobarah nahi banaye ga kharab miyaar	Negative	['dobarah', 'miyaar']
645	TH281FA16STEWNAFAMZ	iftikhar ali	6661	2018-08-12	3	0	theek hai ke aap kaamil nahi they mein tawaqqa kar raha tha ke kuch aur imandaar ho ga aur yeh kuch mukhtalif nazar aya teesray dhoney ke baad aur woh bhi thanday pani se baniyan dheelay par gaya mein neh aisa nahi kya yahan taq ke usay dhoop mein bhi khushk karlen aur yahan taq ke usay thanday pani mein dhoya gaya aur phir bhi yeh dheelay par gaya jo vaqata pat qabil reham hai mein neh iss maqsa…	Negative	['tawaqqa', 'imandaar', 'mukhtalif', 'dhoney', 'thanday', 'baniyan', 'dheelay', 'neh', 'dhoop', 'khushk', 'thanday', 'dheelay', 'vaqata', 'qabil', 'reham', 'neh', 'maqsad', 'muhayya', 'dheelay', 'tareeqay', 'silai', 'takmeel', 'maslay']
646	TH281FA16STEWNAFAMZ	saqib ali	7162	2017-09-07	2	0	ke size ke sath koi masla nahi hai mujhe waqai achh well lagayen aur rang bhi safaid safaid tha lekin aik ahem masla yeh hai ke woh tafseel mein jo kuch kehta hai iss se kuch ziyada qareeb nahi hai kyunkay ab taq iss nai kisi terhan bhi patla honay mein meri madad nahi ki hai ya mujhe aisa hota sun hwa nazar nahi aata hai mustaqbil mein bhi usay pehnana yeh aam baniyan ki terhan hai jo pehnana aa…	Neutral	['size', 'masla', 'rang', 'safaid', 'safaid', 'ahem', 'masla', 'tafseel', 'qareeb', 'patla', 'madad', 'mustaqbil', 'pehnana', 'baniyan', 'pehnana', 'maqsad', 'khidmat', 'pahannay']
647	TH281FA16STEWNAFAMZ	Ahsan Qamar	501	2017-08-29	5	0	unk ps chota size b hona chya	Negative	['chota', 'size']
648	TH281FA0NK5OSNAFAMZ	RDA	4275	2019-12-16	3	0	wakt p mila hai laik quality achi nai hai	Negative	['wakt', 'quality']
649	TH281FA0NK5OSNAFAMZ	Fahad Sadaqat	1614	2019-06-19	4	0	theek hai mujhe yahan apni ghalti ka aitraaf karna parre ga kyun ke ghalti se chhootey size ka order diya gaya tha jo meri nahi thi iss liye mein ny usay mazeed tohfay mein diya tha lekin mujhe aap ko yeh batana hoga ke yeh tank tops waqai uch quality theen aur design mein bhi kaafi achi lag rahi theen jaisa ke iss mein dekhaya gaya hai tasweer	Positive	['ghalti', 'ghalti', 'chhootey', 'size', 'order', 'tohfay', 'tank', 'tops', 'quality', 'design', 'tasweer']
650	TH281FA0NK5OSNAFAMZ	Qasim Habib	4239	2018-10-05	2	0	un shirts ko agay berhate hue yeh aik khofnaak tajurbah tha mein ne unhein sirf aik baar aazmaaya aur tab se hi woh ghar mein kahin kahin parre hue hain miyaar vaqata baad kharab tha print bhi qabil reham miyaar ka tha iss ke sath ahem mamlaat un tank tops ki jasamat thi size ke mutabiq fitting ka samaan bohat mukhtalif tha fitting ka inhisaar apne says ke silsilay mein behtar hona chahiye tha do…	Negative	['shirts', 'khofnaak', 'tajurbah', 'aazmaaya', 'kahin', 'kahin', 'miyaar', 'vaqata', 'print', 'qabil', 'reham', 'miyaar', 'ahem', 'tank', 'tops', 'jasamat', 'size', 'fitting', 'samaan', 'mukhtalif', 'fitting', 'masla', 'saamna', 'maday', 'miyaar', 'baray', 'roshni', 'paidaar', 'majmoi', 'tor', 'khofnaak', 'tajurbah']
651	DA290FA01AS88NAFAMZ	Rahmatullah	4339	2017-06-12	4	0	wood land brown sandle design lekin yeh vindl sandle nahi hai wood land sandle ki sandle ki achi copy	Negative	['wood', 'land', 'brown', 'sandle', 'design', 'sandle', 'wood', 'land', 'sandle', 'sandle', 'copy']
652	MA305FA1KY528NAFAMZ	Shah je	5008	2019-09-29	3	1	pichlle saal mein ny isi tea shirts pack size ke xl ya xxl ke liye book kya tha aur jab mein ny rik wusool kya tu wahan tea shirts chhootey size ke thay lekin tea shirt tig par xl dikha raha tha size mein darkhwast karta hon ke tea shirts marsal plz bhejen size mein tea shirt ko pack mein shukriya	Positive	['tea', 'shirts', 'pack', 'size', 'book', 'wusool', 'wahan', 'tea', 'shirts', 'chhootey', 'size', 'tea', 'size', 'darkhwast', 'tea', 'shirts', 'size', 'tea', 'pack']
653	MA305FA1KY528NAFAMZ	Nabeel Nawaz	3865	2016-05-01	2	0	yeh bilkul saddar mein riks market mein dastyab ost sastay tarrrrr shirts ki terhan hain lekin sab se ahem baat yeh hai ke rang bilkul bilkul aisay nahi thay jaisay woh daraz ke samnay walay hissay par dukhaay jatay hain tane banay bhi bohat hi kaam miyaar ke hain aur yeh kar satke hain kaha jaye ke yahan taq ke iss ki qeemat ke mutabiq yeh sirf aik ost numeral hai silai mein bhi kayi naqais hain	Positive	['market', 'dastyab', 'sastay', 'shirts', 'ahem', 'rang', 'aisay', 'samnay', 'hissay', 'dukhaay', 'tane', 'miyaar', 'qeemat', 'silai']
654	MA305FA1KY528NAFAMZ	Alam..	575	2018-10-09	2	0	size aik dosray se bilkul mukhtalif hain kabhi bhi cheeze garmi ki nahi hoti hain	Negative	['size', 'dosray', 'mukhtalif', 'cheeze']
655	MA305FA1KY528NAFAMZ	Mustafa Kamal	3806	2019-10-22	3	1	heeze bilkul theek hain lekin xl shirt barray ke bajaye splayr ke zareya bheja gaya	Negative	['barray']
656	MA305FA1KY528NAFAMZ	Muhammad Nauman Nawaz	3605	2017-08-14	5	1	garmiyon ke mausam garam mausam ke liye iss ki umdah shakal aur bohat behtar hai saaf aur umdah kapray ki qmizin	Positive	['garmiyon', 'mausam', 'garam', 'mausam', 'umdah', 'shakal', 'saaf', 'umdah', 'kapray', 'qmizin']
657	MA305FA1KY528NAFAMZ	Syed Jaffer Raees Zaidi	5403	2017-07-18	5	1	mein iss qeemat ki hadd mein iss se behtar kisi ka tasawwur bhi nahi karsaktha karachi mein mousmi haalat ke liye yeh aik behtareen match hai mein ne aap ko setaaray diye hon ge lekin aap ne mujhe giray rang ki kameez nahi bhaije iss jagah par aap ne mujhe aik peela rang bheja jo achchca hai lekin yeh mera pasandeeda rang nahi hai order ki tasdeeq ke teesray din pouncha di gayi lehaza majmoi tor …	Negative	['qeemat', 'tasawwur', 'haalat', 'behtareen', 'match', 'setaaray', 'rang', 'kameez', 'peela', 'rang', 'pasandeeda', 'rang', 'order', 'din', 'majmoi', 'tor', 'kharidari', '']
658	SU455FA18NJ18NAFAMZ	Muhammad Arsal	3522	2017-01-19	4	0	bohat achi ghari nay mujhe intzaar mein rakha lekin mujhe tafyan bhaij kar aap ki bohat achi lag rahi hai	Positive	['intzaar', '']
659	SU455FA18NJ18NAFAMZ	Masroor	3062	2016-05-17	4	0	ya acha h iss keemat may aur mujhy psnd b hai	Positive	['keemat', 'psnd']
660	SU455FA18NJ18NAFAMZ	Sarwar	4932	2016-11-18	3	0	yeh aahista tha mere khayal mein woh sale puranay hain munasib waqt show nai ke are aarah ya munasib se daur du nai ho raha	Neutral	['aahista', 'khayal', 'puranay', 'munasib', 'waqt', 'show', 'munasib', 'daur']
661	SU455FA18NJ18NAFAMZ	Saeed khan	4704	2017-09-16	4	0	yeh theek hai mein ne apne bachon ko iss ki naqal tayyar karne ka hukum diya tha mujhe iss se ziyada tawaqqa nahi thi kyunkay yeh aik copy hai yeh ab bhi theek kaam kar raha hai aur fa aal hai lekin intehai ghair mutawaqqa hai tamam af aal aur khususiyaat working order mein hain display roshan aur wazeh hai hindsay wazeh aur mryi hain iss ail dd gharri ka bind kalayi ko bilkul foot baithta hai me…	Positive	['tawaqqa', 'copy', 'intehai', 'tamam', 'working', 'order', 'display', 'roshan', 'wazeh', 'hindsay', 'wazeh', 'bind', 'kalayi', 'baithta', 'pasand', 'copy', 'miyaar']
662	SU455FA18NJ18NAFAMZ	Ameer	718	2019-01-06	5	0	mein waqai iss gharri ko adjust aur waqai susti aur susti mohabbat karta hon ke iss ki qeemat aur raahat ke l its mein iss ke kaam aur zabardast sakht ko kis terhan pasand karta hon	Positive	['adjust', 'susti', 'susti', 'mohabbat', 'qeemat', 'raahat', 'zabardast', 'sakht', 'pasand']
663	AY536FA01RBGANAFAMZ	Kamran	2568	2020-01-01	2	1	har tukre ka size mukhtalif hota hai miyaar bohat kaam hai bilkul sifarish nahi ki jati hai	Negative	['tukre', 'size', 'mukhtalif', 'miyaar', 'sifarish']
664	AY536FA01RBGANAFAMZ	sami	7146	2018-04-05	5	1	achh sh sharts achi terhan chal rahi hain allah aap ko ziyada se ziyada aata kere ga	Positive	['sharts', 'allah']
665	AY536FA01RBGANAFAMZ	sharukh	7220	2017-05-05	5	1	boxer rang ka bandal	Neutral	['boxer', 'rang', 'bandal']
666	OA551FA02JMCKNAFAMZ	Rana Tayab	4393	2017-04-17	4	0	jab aap jooton aur iss ke miyaar ke baarey mein baat karte hain tu woh sab theek tha lekin aik ahem baat jis ki nishandahi karna chahta hon woh yeh hai ke mujhe iss numeral ki asliyat par shubhat hain jab se yeh mujhe aisa lagta tha jaisay yeh rang ke baad se istemaal hue hain aisa lagta hai ke yeh madoom ho chuke hain	Negative	['miyaar', 'ahem', 'chahta', 'shubhat', 'rang', 'madoom']
667	OA551FA1B35TGNAFAMZ	qaiser	7037	2016-05-14	1	0	koi chamra nihayat hi naaqis aur kharab miyaar ka mawaad bohat kharab silai	Positive	['naaqis', 'miyaar', 'silai']
668	OA551FA1B35TGNAFAMZ	Amanulah	704	2016-05-12	4	0	mein ne ko size ka order diya hai aur number nahi delivery butt order par adaigi abhi tak nahi ki gayi hai	Negative	['size', 'order', 'number', 'order', 'adaigi']
669	OA551FA1B35TGNAFAMZ	Ali	589	2019-11-18	3	0	mere tamam jootay size ke hain lehaza mein ne size ka order diya yeh bilkul bhi foot nahi tha bohat chhota tha	Negative	['tamam', 'jootay', 'size', 'size', 'order', 'chhota']
670	OA551FA1B35TGNAFAMZ	Nice	4031	2016-07-14	4	0	yeh jootay bilkul theek hain mujhe waqai khushi hai ke yeh achi terhan se foot hain aur yeh mawaad aik aaccha chamray ka miyaar bhi hai mein inhen aram da aur pursukoon aur bazabta istemaal ke liye istemaal karta hon aur un jootay ko barqarar rakhna bhi bohat asan hai	Positive	['jootay', 'khushi', 'chamray', 'miyaar', 'aram', 'pursukoon', 'jootay', 'barqarar', 'rakhna', 'asan']
671	OA551FA1B35TGNAFAMZ	Asif Mughal	1016	2017-05-04	4	0	yeh waqai aik umdah jori hai aur yeh maghribi kapron mein bohat achi lagti hai yahan taq ke yeh kurta shlwar ke sath bhi aik saaf suthri nazar deta hai dd size itna kaamil tha jaisa ke mujhe iss par shak tha yeh mawaad khalis chamray ki nahi hai lekin yeh qeemat ke mutabiq waqai mein aik achcha mad is hai yeh naram aur aram da aur pursukoon wahid ki wajah se mujhe ziyada se ziyada raahat ki satah…	Positive	['umdah', 'jori', 'maghribi', 'kapron', 'kurta', 'shlwar', 'saaf', 'size', 'khalis', 'chamray', 'qeemat', 'mad', 'naram', 'aram', 'pursukoon', 'wahid', 'wajah', 'raahat', 'muhayya', 'sajeela', 'samnay', 'design', 'jori', 'kashish', 'jorta', 'tor', 'herat', 'angaiz', 'soda', 'qeemat', 'miyaar', 'baqaidagi']
672	MA305FA1JP0IWNAFAMZ	Aly	696	2019-03-11	1	0	photo se bohat mukhtalif lekin aik hi andaaz hai iss ka kapra bilkul saada sa hai	Negative	['photo', 'mukhtalif', 'andaaz', 'kapra', 'saada']
673	DE901FA09BSV6NAFAMZ	Noor Ul Hussain Mirza	4081	2017-04-13	1	0	ahan se aap log lambai ki pemaiesh karen barray size mein sirf inch lamba hai jaali maloomat di gayeen	Negative	['log', 'lambai', 'pemaiesh', 'barray', 'size', 'inch', 'lamba', 'jaali', 'maloomat']
674	DE901FA09BSV6NAFAMZ	Aamir	124	2019-12-12	1	0	majmoi tor par fabric theek hai pakistani choona lagni ka mauqa za ny plzzzz yeh hai ke supply kaaf k khilafat action laiya jae hai nmbr pi are	Neutral	['majmoi', 'tor', 'fabric', 'supply', 'khilafat', 'action', '']
675	GR048FA14CK0SNAFAMZ	Muhammad	3482	2019-06-12	4	0	achi chez h tsveer sy b	Positive	['tsveer']
676	GR048FA14CK0SNAFAMZ	Waqas	5888	2016-02-05	4	0	achi chez hai aur keemat b sai hai	Positive	['keemat']
677	GR048FA14CK0SNAFAMZ	Waqas	5888	2017-11-29	4	0	achi chez hai aur keemat b sai hai	Positive	['keemat']
678	MA305FA0YA7AENAFAMZ	Qaiser ahmed	4217	2017-09-21	1	0	plz apna wkt aur pasy zaya na kry	Negative	['wkt', 'pasy']
679	MA305FA0YA7AENAFAMZ	Dania Usman	1391	2017-09-09	2	0	un ka miyaar bilkul kharab tha tane banay ka miyaar vaqata poor kharab tha silai khofnaak thi aur mad all ko bilkul bhi aram mehsoos nahi hota tha mujhe lagta hai ke mein ne iss ki kharidari mein apna paisa zaya kya hai ka pack	Negative	['miyaar', 'tane', 'miyaar', 'vaqata', 'silai', 'khofnaak', 'mad', 'aram', 'mehsoos', 'kharidari', 'paisa', 'pack']
680	MA305FA0YA7AENAFAMZ	Mian Ali	3127	2018-01-17	1	0	theek hai un ka miyaar khofnaak tha mein ne yeh sirf aik baar pehna hai aur tane banay itnay kamzor aur putlaay hain ke yeh wast se phaar parre hain un ki intahi afsoosnaak kefiyat silai aur tane banay waqai bohat kharab hain mere paas iss se pehlay daraz se order diya gaya tha lekin yeh vaqata baad kharab tajurbah tha	Negative	['miyaar', 'khofnaak', 'tane', 'kamzor', 'putlaay', 'afsoosnaak', 'silai', 'tane', 'pehlay', 'order', 'vaqata', 'tajurbah']
681	MA305FA0YA7AENAFAMZ	Tufail Ahmed	5635	2017-05-22	2	0	yeh patlon theek hain lekin mein ghair saaf silai aur kaam miyaar ke tane banay ki wajah se tajweez nahi karoon ga tane banay bohat halkay aram da aur pursukoon hotay hain lekin woh pahannay mein itminan aur raahat nahi dete hain aisa mehsoos hota hai ke silai phelnay par phatt jati hai ya un mein aasani hojati hai	Positive	['patlon', 'saaf', 'silai', 'miyaar', 'tane', 'wajah', 'tajweez', 'tane', 'aram', 'pursukoon', 'pahannay', 'itminan', 'raahat', 'mehsoos', 'silai', 'phelnay', 'phatt', 'aasani']
682	MA305FA0YA7AENAFAMZ	Ikram	2278	2017-02-23	5	0	iss ke miyaar se le kar iss ke rang aur size taq masnoaat se mutmaen mere khayalat se mawra kyunkay mein yeh soch raha tha ke miyaar ost se kaam hoga lekin jaisa ke mein ne kaha ke mein choank gaya hon	Positive	['miyaar', 'rang', 'size', 'masnoaat', 'khayalat', 'soch', 'miyaar', '']
683	MA305FA0YA7AENAFAMZ	Alinawaz baloch	666	2019-04-17	4	0	daraz nai dehleez par behtareen miyaar ki farahmi ko itna asan bana diya hai yeh patlon yakeeni tor par naram aur aram da aur pursukoon tane banay se tayyar ki gayi hain size aur fitting bhi bohat achi hai mein inhen charon taraf sardi laganay ke l wear p_hnta hon ya aksar un mein sota hon	Positive	['dehleez', 'behtareen', 'miyaar', 'farahmi', 'asan', 'patlon', 'tor', 'naram', 'aram', 'pursukoon', 'tane', 'size', 'fitting', 'taraf', 'wear', 'phnta', 'aksar']
684	MA305FA0YA7AENAFAMZ	Abdul Hanif	176	2018-07-18	3	0	yeh pajamay ziyada achay nahi hain lekin yeh bhi kharab nahi hain neend ke libaas ke liye ost aur design theek hain taham miyaar qabil aitraaz hai aur isi wajah se mein iss ke baarey mein ziyada khawahish mand bhi nahi hon usay mein se dena	Negative	['pajamay', 'libaas', 'design', 'miyaar', 'qabil', 'aitraaz', 'wajah']
685	MA305FA138634NAFAMZ	shaikh	7209	2020-01-10	1	0	meri yeh mahswara hai ke mein yeh nah khareedon ke iss ka miyaar bohat kaam hai yahan taq ke inhen achh aa bhi nahi lagaya jata hai	Negative	['khareedon', 'miyaar']
686	MA305FA138634NAFAMZ	Idrees	2250	2018-02-27	4	0	yeh pajamay waqai achay hain aur mein unhein bhi bohat aram da mehsoos karta hon ramadaan ke douran aur din bhar bemaar rehne ke douran yeh sara din ghoomnay wali behtareen jori hai bohat	Positive	['pajamay', 'aram', 'mehsoos', 'douran', 'din', 'bhar', 'douran', 'din', 'behtareen', 'jori', '']
687	MA305FA138634NAFAMZ	Shakeel	5095	2017-07-11	1	0	mein ne iss numeral ke liye order diya jis ko aur iss ko bohat kaam miyaar ka pata chala ke sirf aik baar pahannay ke baad bhi yeh phti ho jati hai daraz ko daraz pk par numeral zahir karne ke liye un ke muahiday ko mustard karna hoga	Negative	['order', 'miyaar', 'pahannay', 'zahir', 'mustard']
688	HY086FA1HOWXINAFAMZ	Review	4463	2016-09-25	3	0	bilkul theek hai lekin yeh gehra arghawani siyah rang hai neelay nahi	Positive	['arghawani', 'siyah', 'rang', 'neelay']
689	AY536FA01RBGANAFAMZ	burhan	6450	2019-09-30	5	1	khobsorat bandal bohat bohat shukriya	Positive	['khobsorat', 'bandal']
690	AY536FA01RBGANAFAMZ	balaaj	6409	2018-12-25	5	1	meri zaroriat ke mutabiq aik hi zabardast soda pack sath hi aap ka bohat bohat shukriya kkhuda kere	Positive	['zabardast', 'soda', 'pack']
691	AY536FA01RBGANAFAMZ	kamran	6750	2019-01-19	5	1	achi nokari shukriya ke aap nay aap ko wasee pemanay par kharidari se mutmaen kya	Positive	['kharidari']
692	AY536FA01RBGANAFAMZ	ishan kumar	6697	2016-11-22	5	1	zabardast mazmoon vaqata you aap mera aetmaad itna khush karte hain ke aap bhi kharidari karen	Positive	['zabardast', 'mazmoon', 'vaqata', 'aetmaad', 'khush', 'kharidari', '']
693	AY536FA01RBGANAFAMZ	osama	7022	2016-06-07	5	1	waqai pyara mazmoon yeh aap ki dukaan ki sharmeeli baat hai	Positive	['pyara', 'mazmoon', 'dukaan', 'sharmeeli']
694	SU455FA18NJ18NAFAMZ	Tahir Shiakh	5508	2016-07-25	5	0	aik bohat achi lag rahi gharri yeh bohat hi khobsorat aur hamwar lag rahi hai lekin bohat khobsorat hai behtareen hissa yeh hai ke yeh aik khobsorat gharri ki terhan dikhayi deti hai lekin yeh sports watch hai aur yeh miyaar mein bohat paidaar hai red ail dd bohat achi lagti hai black dial doosri baat yeh ke yeh sirf size mein kaamil hai aur taqreeban har libaas ke sath bohat mozoon hai	Positive	['khobsorat', 'hamwar', 'khobsorat', 'behtareen', 'hissa', 'khobsorat', 'dikhayi', 'sports', 'watch', 'miyaar', 'paidaar', 'red', 'black', 'dial', 'doosri', 'size', 'taqreeban', 'libaas', 'mozoon']
695	SU455FA18NJ18NAFAMZ	Zoraiz Zafar	6174	2017-06-22	3	0	mein ne un mein se du ka hukum diya tha aik kaam kar raha tha aur dosra kaam nahi kar raha tha mere dono betay aik baar milnay ke muntazir thay lekin baad qismati se mera aik beta afsurdah tha chunkay kaam karne ki haalat mein usay gharri nahi mili un mein se aik ke paas khaliye kamzor thay lehaza yeh kaam nahi kar raha tha woh jo kaam kar raha tha woh tamam pehluo mein behtareen tha mein ne apne…	Negative	['milnay', 'qismati', 'haalat', 'kamzor', 'tamam', 'behtareen', 'kalayi', 'miyaar']
696	SU455FA18NJ18NAFAMZ	Bilal Ali	1277	2017-08-14	5	0	yeh mohazab nazar anay wali ail dd sports watch mukammal tor par nishaan zad hai kyunkay iss ka miyaar sirf kaamil aur qabil tajweez hai lead screen khobsorat dikhayi deti hai khaas tor par raton mein aur pita ka miyaar bhi bohat umdah hota hai iss gharri ka mawaad khalsta sport aur khobsorat hai isi waqt siyah rang sirf kaamil nazar aata hai aur iss se gharri aap ki kalayi par bohat hooshiyar na…	Negative	['sports', 'watch', 'mukammal', 'tor', 'nishaan', 'miyaar', 'qabil', 'tajweez', 'lead', 'screen', 'khobsorat', 'dikhayi', 'khaas', 'tor', 'miyaar', 'umdah', 'sport', 'khobsorat', 'waqt', 'siyah', 'rang', 'kalayi', 'hooshiyar']
697	SU455FA18NJ18NAFAMZ	Raja	4347	2019-12-03	5	0	waqai achi terhan se banaya gaya hai aik acha fashion lawazmaat tea bi each	Positive	['banaya', 'fashion', 'lawazmaat', 'tea']
698	MA305FA1KY528NAFAMZ	Asif Qamar	1020	2016-08-16	5	1	yeh qmizin intahi naram aur saans lainay walay tane banay ke sath bani hain iss garmi mein pahannay mein itna aram da aur pursukoon hai iss ka tehra saaf hai aur ziyada se ziyada sukoon milta hai website mein wohi rangeen order mousool sun hwa aur yeh sab uch are hai	Negative	['qmizin', 'naram', 'tane', 'pahannay', 'aram', 'pursukoon', 'saaf', 'sukoon', 'website', 'rangeen', 'order', 'mousool']
699	MA305FA1KY528NAFAMZ	mr. Muhammad	6902	2016-12-30	4	1	mere liye yeh qmizin uch good hain mujhe yeh mawaad bohat acha aur raahat bakhash maloom hota hai aur rang bhi mere liye bohat mutharrak aur roshan hotay hain mein iss nateejay par mutmaen hon	Positive	['qmizin', 'good', 'raahat', 'bakhash', 'maloom', 'rang', 'mutharrak', 'roshan', 'nateejay']
700	MA305FA1KY528NAFAMZ	Haji Mushtaq Ali	1984	2016-12-15	5	1	iss qeemat mein itna achh quality miyaar nahi dekha hai tamam rang tasweer ke ain mutabiq thay aur isi tarteeb mein samaan naram aur qabil aetmaad lagta hai mein ne usay kayi baar dhula hai aur iss ki shakal abhi bhi hai iss ke sath kuch nahi sun hwa hai size ya hatta ke rangon mujhe khushii hai ke un ko mausam ke l for haasil karoon	Positive	['qeemat', 'quality', 'miyaar', 'dekha', 'tamam', 'rang', 'tasweer', 'tarteeb', 'samaan', 'naram', 'qabil', 'aetmaad', 'shakal', 'size', 'mausam', 'haasil']
701	MA305FA1KY528NAFAMZ	Dr fauzia Aitazaz	1469	2018-02-08	5	1	mein un chkyon mein istemaal honay walay mawaad se mutasir hon yeh itna saans lainay wala hai aur aram da aur pursukoon tor par sardi laganay ke l perfect behtareen hai rang tasweer ki terhan achay hain qeemat ke miyaar aur season ke hawale se yeh aik misali pack hai	Positive	['mutasir', 'aram', 'pursukoon', 'tor', 'perfect', 'behtareen', 'rang', 'tasweer', 'qeemat', 'miyaar', 'season', 'hawale', 'misali', 'pack']
702	MA305FA1KY528NAFAMZ	Yousuf	5999	2017-10-09	4	1	yeh kuch achi qmisin hain aur tane banay bhi waqai aram da aur pursukoon hain mujhe un ke rang mushtahir honay ke mutabiq bohat durust maloom hotay hain aur un ki fitting itni achi hai mein inhen sara din sirf pehan sakta tha	Positive	['qmisin', 'tane', 'aram', 'pursukoon', 'rang', 'durust', 'maloom', 'fitting', 'din', 'pehan']
703	SU455FA18NJ18NAFAMZ	Hafiz Arshad	1956	2018-09-13	1	1	yeh itna umdah nahi yeh aik aam numeral hai gharri ke hindsay mukammal tor par nahi arhay thay hindsay juzwi tor par dukhaay jatay thay mein nay apni baityon ke liye iss ka order diya tha aur inhen iss tarz ko pasand aya mein nay gharri ko theek karne ki koshish ki aur jab mein nay usay khoola tu mein nay paaya ke ail dd ki tadaad kaam hai kaam kaam meri raye mein un ail dd ki tadaad ko badhaya j…	Positive	['umdah', 'hindsay', 'mukammal', 'tor', 'hindsay', 'tor', 'dukhaay', 'order', 'pasand', 'koshish', 'paaya', 'tadaad', 'tadaad', 'dikhayi', 'miyaar', 'banaya', 'betiyan', 'pehan', 'miyaar', 'zabardast']
704	SU455FA18NJ18NAFAMZ	Syed Aziz	5385	2017-12-22	1	1	yeh adjust nahi tha yeh mere biton ki kalayi mein foot baith gaya tha aur iss l eay mein nai adjust karne ki koshish ki lekin baad qismati se mein aisa nahi krska mein iss numeral se bilkul khush nahi hon kash mein hi kuch sahoolat ho	Negative	['adjust', 'kalayi', 'adjust', 'koshish', 'qismati', 'khush', 'sahoolat']
705	MA305FA1KY528NAFAMZ	Umair Yasir	5682	2016-04-17	1	0	woh safaid ki bajaye peelay rang bhaijtay hain aur size bhi chhootey hotay hain	Negative	['safaid', 'peelay', 'rang', 'bhaijtay', 'size', 'chhootey']
706	MA305FA1KY528NAFAMZ	Mr. Numan	3314	2017-01-14	4	1	yeh qmizin bohat achi lag rahi hain aur foot bhi hain kisi hadd tak istemaal ke l perf bhi behtareen hain aur iss garam mausam ke liye bhi mein nay un sab ki koshish ki hai kalay aur neelay rangon ko pasand hai aur mein yeh bhi shaamil karoon ga ke yeh bhi aram da hain	Positive	['qmizin', 'behtareen', 'garam', 'mausam', 'koshish', 'kalay', 'neelay', 'pasand', 'shaamil', 'aram']
707	MA305FA1KY528NAFAMZ	Nabeel Naseer	3863	2018-02-17	3	1	yeh pack haasil karne mein yeh sab se roshan khayalat nahi thay jaisay hi qeemat nazar aati hai aap logon ka size ghalat ho gaya yeh chhota aur theek terhan se foot nahi hota hai fitting thora bohat tang hai aur mein usay pahannay mein takleef mehsoos karta hon	Negative	['pack', 'haasil', 'roshan', 'khayalat', 'qeemat', 'logon', 'size', 'ghalat', 'chhota', 'fitting', 'tang', 'pahannay', 'takleef', 'mehsoos']
708	MA305FA1KY528NAFAMZ	Junaid Ahmer	2514	2019-10-24	3	1	jitna achchca mein ne socha tha ke yeh qmizin hon gi mein iss se khush nahi hon iss ki wajah yeh hai ke tea shirts ki fitting mein itna achchca nahi hai aik size jaisa chhota aur ke aas paas bohat tang mehsoos hota hai rang aur sab waqai achay hain lekin size ki wajah se yeh sab shirts izafi foot lagti hain	Negative	['qmizin', 'khush', 'wajah', 'tea', 'shirts', 'fitting', 'size', 'chhota', 'tang', 'mehsoos', 'rang', 'size', 'wajah', 'shirts', 'izafi']
709	MA305FA1KY528NAFAMZ	Mubashir	3455	2019-10-19	4	1	yeh qmizin waqai uch and hain aur qeemat mein bhi foot hain naram kapaas ka tane banay jab yeh pehantay hain tu waqai halka aur naram mehsoos hota hai jo mein garmi ko maarny ke liye behtareen mehsoos karta hon aur rang bhi itnay purkashish hotay hain jis se yeh aik aaccha set hai aik achi qeemat ke liye	Positive	['qmizin', 'qeemat', 'naram', 'kapaas', 'tane', 'halka', 'naram', 'mehsoos', 'behtareen', 'mehsoos', 'rang', 'purkashish', 'set', 'qeemat']
710	OA551FA1B35TGNAFAMZ	Ahmer	482	2019-03-27	4	0	mein yeh jootay bohat pasand karta hon inhen aisa mehsoos ho sakta hai ke woh baqaida hain lekin woh paidaar bhi hain bazabta aur arram da aur pursukoon nazar atay hain aur mahaaz par umdah silai achh it baat qabil zikar hojati hai mujhe joota chamka dainay wala mila iss ke sath jo ke ostan sa hai mein ne behtar ko dekha hai aur istemaal kya hai lekin iss ki yahi soch hai ke	Positive	['jootay', 'pasand', 'mehsoos', 'paidaar', 'pursukoon', 'umdah', 'silai', 'qabil', 'joota', 'chamka', 'dekha', 'soch', '']
711	OA551FA1B35TGNAFAMZ	Raza	4431	2016-07-22	1	1	un jooton mein chamray ka koi nishaan nahi hai woh waqai naaqis hain aur aisa nahi lagta hai ke yeh bilkul barqarar rahay ga mein nay aik baar usay pehna tha aur palllll ke ehsas se bohat tang tha paun aur mein nay iss ke baad se istemaal nahi kya hai	Negative	['chamray', 'nishaan', 'naaqis', 'barqarar', 'tang', 'paun', '']
712	OA551FA1B35TGNAFAMZ	Shaikh Hamdan	5087	2018-10-07	1	0	chamray ke jooton ki iss terhan ki kharab daraja bandi yeh yakeeni tor par kisi zawiye se chamray ke nahi hain jooton ka miyaar vaqata poor kharab hai jaisay aap aik baar pehantay ho aur pheink dete ho mujhe waqai mayoosi hui hai	Negative	['chamray', 'daraja', 'bandi', 'tor', 'zawiye', 'chamray', 'miyaar', 'vaqata', 'mayoosi', '']
713	OA551FA1B35TGNAFAMZ	Usman Jahangeer	5763	2020-01-22	1	0	yeh jootay bilkul bhi nahi hain ke mein ne un se kaisay tawaqqa ki thi qeemat ke lehaz se woh bohat mehngay hain iss miyaar ke muqablay mein jis ka chamra nahi hai mein bohat mayoos hon mujhe bohat si tawaquaat theen jaisa ke mein doosri web siton se bhi cheezon ka order diya hai un ka miyaar vaqata good aaccha raha hai lekin yeh aik qadray nahi	Positive	['jootay', 'kaisay', 'tawaqqa', 'qeemat', 'lehaz', 'mehngay', 'miyaar', 'mayoos', 'tawaquaat', 'doosri', 'web', 'cheezon', 'order', 'miyaar', 'vaqata', 'good', 'qadray', '']
714	OA551FA1B35TGNAFAMZ	Mr. Fatin	3306	2019-01-21	3	0	yeh jootay itnay achay nahi hain mujhe iss se bohat tawaqqa ki gayi thi lekin mein iss se khush nahi hon ke joota kaisay tayyar kya gaya hai samnay walay hissay ka chipkna bohat kharab hai aur chamray ka miyaar bhi aaccha nahi hai	Negative	['jootay', 'tawaqqa', 'khush', 'joota', 'kaisay', 'samnay', 'hissay', 'chamray', 'miyaar']
715	OA551FA1B35TGNAFAMZ	Zeeshan	6135	2017-01-27	3	0	achi lag rahi hai lekin sirf aram da aur pursukoon istemaal ke l	Positive	['aram', 'pursukoon']
716	OA551FA1B35TGNAFAMZ	Shujat Ali	5234	2017-07-15	2	0	mein jootay ka miyaar pasand nahi karta tha kyun ke woh pehlu se kharab hogaye thay aur maadi nuqsaan iss noiyat ka nahi tha jis ki wajah koryir company kere gi barah karam aap ko bhejnay se pehlay jaanch karne ki darkhwast hai	Negative	['jootay', 'miyaar', 'pasand', 'hogaye', 'nuqsaan', 'wajah', 'pehlay', 'jaanch', 'darkhwast']
717	OA551FA1B35TGNAFAMZ	Jamal Durrani	2430	2019-03-13	3	0	ab un jooton ka koi bara purastaar nahi hai jab mein ne iss ki khoobi ka tajurbah kya hai aur mad very bhi itna achchca nahi hai aap usay dekh satke hain aur kya mamlaat hain iss ka pata laga saktay hain silai se le kar kisi hadd taq airee aur miyaar chamray bhi ameer nahi hai	Negative	['bara', 'tajurbah', 'mad', 'silai', 'miyaar', 'chamray']
718	OA551FA1B35TGNAFAMZ	Adam Khanzada	312	2016-04-01	4	0	mein unhein bohat pasand karta hon woh aram da aur pursukoon libaas ke l good achay hain aur woh un pehantay hain aur aasani se phaar satke hain woh roz maraah istemaal ke l enough kaafi paidaar lagtay hain aur size bhi ishara par hi sahih hai	Positive	['pasand', 'aram', 'pursukoon', 'libaas', 'good', 'aasani', 'roz', 'paidaar', 'size', 'ishara']
719	MA305FA0YA7AENAFAMZ	nasir usman	6979	2017-11-18	5	0	mein online shopping se kabhi mutmaen nahi tha lekin ab aisa nahi hai jab se mein ny daraz dot pi ke ka istemaal shuru kya hai iss website ko behtareen qeemat ki hadd mein behtareen cheeze mil gayi hain yeh ittifaqi tor par aram se aram da aur pursukoon rehte hain chacker patteren aur rang bhi achay hain kaafi aram da aur pursukoon cheeze itnay saaf suthra hue hain jis ka size aur fitting itna ka…	Negative	['online', 'shopping', 'dot', 'website', 'behtareen', 'qeemat', 'behtareen', 'cheeze', 'tor', 'aram', 'aram', 'pursukoon', 'patteren', 'rang', 'aram', 'pursukoon', 'cheeze', 'saaf', 'size', 'fitting', 'misali', 'tor', 'behtareen']
720	MA305FA0YA7AENAFAMZ	shahzad malik	7205	2016-04-11	3	0	kapray ka miyaar acha hai lekin iss ka size saal ka larka hai	Negative	['kapray', 'miyaar', 'size']
721	MA305FA0YA7AENAFAMZ	sheikh umar	7234	2018-08-03	3	0	yeh patlon aram da aur pursukoon nahi hain kyunkay yeh tang jurey hue hain aur silai bhi saaf nahi hai iss ke saaray dhaagay kho rahay hain kya yeh pahannay mein aasani aur aasani se pareshan nahi kar saktay hain lekin yeh kapray halkay hain aur itminan bakhash lekin mein silai se mutmaen nahi hon	Negative	['patlon', 'aram', 'pursukoon', 'tang', 'jurey', 'silai', 'saaf', 'dhaagay', 'pahannay', 'aasani', 'aasani', 'pareshan', 'kapray', 'itminan', 'bakhash', 'silai']
722	MA305FA0YA7AENAFAMZ	Zeeshan	6135	2019-12-18	3	0	mere liye yeh thora sa dheela hai aur jis ki wajah se mein inhen aksar nahi p_hnta mad definitely yaqeenan arram da hai aur rang aur size bhi theek hai lekin iss ki wajah se mein un ko ab itna ahcha nahi pa raha hon	Negative	['dheela', 'wajah', 'aksar', 'phnta', 'mad', 'rang', 'size', 'wajah']
723	MA305FA0YA7AENAFAMZ	Noman Sial	4072	2018-05-24	4	0	miyaar theek hai lekin tasweeron mein dukhaay jane walay rang mujh se bhijiye gaye hain	Positive	['miyaar', 'tasweeron', 'dukhaay', 'rang']
724	MA305FA0YA7AENAFAMZ	Usman Rasheed	5770	2016-02-03	2	0	bohat susti cheeze aur fitting bhi bohat buri hai mein mutmaen nahi hon	Positive	['susti', 'cheeze', 'fitting', 'buri']
725	MA305FA0YA7AENAFAMZ	Mian Rizwan	3135	2019-10-19	4	0	yeh sharts aram se ghoomnay phirnay ya neend ke libaas ki terhan un ko pahannay ke l pick aik achh pick intikhab hain samaan naram aur aram da aur pursukoon hota hai lekin silai uchhal jati hai yahan taq ke tamam dhaagay bhi nikal arhay hain agarchay mawaad aram se hai lekin mein dawn nahi waqai bahar jane ke liye un ka istemaal karen yeh sonay ke liye bilkul theek hai	Positive	['sharts', 'aram', 'libaas', 'pahannay', 'samaan', 'naram', 'aram', 'pursukoon', 'silai', 'tamam', 'dhaagay', 'aram']
726	MA305FA0YA7AENAFAMZ	Kashan Ahmer	2591	2018-07-16	4	0	qeemat ke nuqta nazar ke l i mein iss pack ki sifarish karoon ga miyaar hadd tak nahi hai lekin mad soft naram hai aur ittafaq se pehna ja sakta hai mein aksar un mein sota hon aur doston ke sath ghoomta hon silai theek hai aur mozoon hai aur sayzng hai kaamil bhi	Positive	['qeemat', 'pack', 'sifarish', 'miyaar', 'mad', 'soft', 'naram', 'aksar', 'silai', 'mozoon', '']
727	MA305FA0YA7AENAFAMZ	haji gohar ali	6587	2017-06-02	3	0	un mein utaar charhao hai mujhe pasand hai ke woh aik hi waqt mein kitni aram da hain kapray ka miyaar nsbta low kaam hai aur woh shayad bohat dairpa nahi rahen ge silai mein bhi behtari ki zaroorat hai	Positive	['pasand', 'waqt', 'kitni', 'aram', 'kapray', 'miyaar', 'low', 'dairpa', 'silai', 'behtari', 'zaroorat']
728	GR048FA14CK0SNAFAMZ	Saqib Shamsi	4899	2017-04-04	5	0	masnoaat ka miyaar bohat acha tha aur qeemat bhi market ki qeemat se kaam thi	Positive	['masnoaat', 'miyaar', 'qeemat', 'market', 'qeemat']
729	MA305FA1KY528NAFAMZ	Irfan Bin Hakim	2345	2018-10-05	2	0	mein ne safaid aur gehra surkh rang ke liye ka order diya hai lekin woh mujhe gehray surkh rang ke bajaye safaid aur halkay surkh ke bajaye peelay rang bhaijtay hain yeh rang gehra surkh safaid mein vaqata chahta hon lekin woh bilkul mukhtalif bhaijtay hain	Neutral	['safaid', 'rang', 'order', 'rang', 'safaid', 'peelay', 'rang', 'bhaijtay', 'rang', 'safaid', 'vaqata', 'chahta', 'mukhtalif', 'bhaijtay']
730	MA305FA1KY528NAFAMZ	Muhammad Waleed	3662	2017-11-17	5	1	zabardast chizen kaamil size saaf silai aap ko itni susti qeemat mein aur kya chahiye mausam ke liye mozoon tane banay patli aur halka phulka aur mujhe waqai mein tamam rang pasand hain woh har roz pahannay ke liye behtareen hain size mere jism ko bilkul foot baithta hai aur chizen itni snag hain mujhe yeh pehnana pasand hai yeh meri almaari mein aik aaccha izafah hai	Positive	['zabardast', 'chizen', 'size', 'saaf', 'silai', 'susti', 'qeemat', 'mausam', 'mozoon', 'tane', 'patli', 'halka', 'phulka', 'tamam', 'rang', 'pasand', 'roz', 'pahannay', 'behtareen', 'size', 'jism', 'baithta', 'chizen', 'pehnana', 'pasand', 'izafah']
731	MA305FA1KY528NAFAMZ	FAHAD RIAZ	1579	2019-11-21	5	1	un tea shirts ke miyaar ko srahne ki zaroorat hai yeh nihayat hi aram da aur pursukoon mawaad hai jo munasib tareeqay se tanka sun hwa hai aur rangon ki aik achi range mein aata hai woh mutasir kin tor par naram aur achh fit fitting tea hain aur mein pehnana pasand karta hon yeh aaj kal	Positive	['tea', 'shirts', 'miyaar', 'zaroorat', 'aram', 'pursukoon', 'munasib', 'tareeqay', 'range', 'mutasir', 'tor', 'naram', 'fit', 'fitting', 'tea', 'pehnana', 'pasand', '']
732	MA305FA1KY528NAFAMZ	syed hamza	7304	2017-03-18	5	1	yeh qmisin behtareen hain mein un se har cheez ko silai se le kar taq har cheez ko pasand karta hon qabil tareef hai aur isi wajah se mein nai ziyada se ziyada froze daraz ka order diya silai itni umdah aur saaf hai aur samaan khalis roi hai pahannay mein bohat aram da hai iss se mujhe pursukoon rehta hai aur iss garam mausam mein pareshan nahi hota jis size aur fitting se koi masla nahi tha yeh …	Positive	['qmisin', 'behtareen', 'silai', 'pasand', 'qabil', 'tareef', 'wajah', 'order', 'silai', 'umdah', 'saaf', 'samaan', 'khalis', 'pahannay', 'aram', 'pursukoon', 'garam', 'mausam', 'pareshan', 'size', 'fitting', 'masla', 'chahta']
733	MA305FA1KY528NAFAMZ	ALI SHAH	83	2018-05-20	1	0	daraz dot pi ke ka medium size pakistani jismani dhanchay ke liye aik chhota size hai mein qamizoon se khush nahi hon kyunkay un ki tawaqqa nahi ki jati thi mein ne un ko kisi aisay shakhs ko dainay ka kaam khatam kardiya jo sahih size ka tha lekin mera maqsad pura nahi sun hwa barah karam up date karen masnoaat ke size chart	Negative	['dot', 'medium', 'size', 'chhota', 'size', 'qamizoon', 'khush', 'tawaqqa', 'aisay', 'shakhs', 'khatam', 'kardiya', 'size', 'maqsad', 'date', 'masnoaat', 'size', 'chart']
734	SU455FA18NJ18NAFAMZ	Mohammad Bilal Ibrahim	3216	2019-12-18	5	1	iss watch ka behtareen wart yeh display hai aur yeh siyah pitay par surkh rang ka ail dd hai yeh kitna achchhaa aur hooshiyar lagta hai iss ki wazahat nahi karsaktha iss gharri ki w ka size bhi bohat umdah hai aur yeh mere hathon ko foot karta hai aur aisa lagta hai mere haath par aik bohat achi quality watch hai iss gharri ka pita miyaar bhi bohat achchhaa hai delivery waqt par thi lekin sirf is…	Negative	['watch', 'behtareen', 'display', 'siyah', 'pitay', 'rang', 'hooshiyar', 'wazahat', 'size', 'umdah', 'hathon', 'haath', 'quality', 'watch', 'miyaar', 'waqt', 'maslay', 'saamna', 'box', 'miyaar', 'mad', 'box', 'aitraaz']
735	SU455FA18NJ18NAFAMZ	Muhammad Irfan khan	3575	2016-07-11	3	1	mujhe masnoaat ki shakal pasand hai display wazeh hindsay bohat wazeh hain bend pahannay ke baad mujhe apni kalayi par jalan mehsoos nahi sun hwa mere paas battery ke waqt se ziyada masla hai jo ziyada der taq nahi chalta hai yeh aik sajeela gharri hai lekin bohat paidaar nahi iss ki battery ke maslay ki wajah se mein ab usay istemaal nahi karta hon	Negative	['masnoaat', 'shakal', 'pasand', 'display', 'wazeh', 'hindsay', 'wazeh', 'bend', 'pahannay', 'kalayi', 'jalan', 'mehsoos', 'battery', 'waqt', 'masla', 'chalta', 'sajeela', 'paidaar', 'battery', 'maslay', 'wajah']
736	SU455FA18NJ18NAFAMZ	Ali Saif	630	2019-09-13	5	1	yeh mukammal tor par nishaan taq tha aur bohat hi halka wazan wala tha hathon mein bohat hooshiyar lagta hai aur aaj kal yeh bohat bhi hai yeh itna achchhaa hai ke yeh water proof hai aur yeh aik terhan se sadme ka saboot hai aur wahan mojood maday ki wajah se jald par jalan ya jaldi pan nahi hai iss ki numayesh bohat achi aur khobsorat hai aur yeh aasani se bright day light mein dikhayi deti hai…	Negative	['mukammal', 'tor', 'nishaan', 'halka', 'wazan', 'hathon', 'hooshiyar', 'water', 'proof', 'saboot', 'wahan', 'mojood', 'maday', 'wajah', 'jalan', 'jaldi', 'numayesh', 'khobsorat', 'aasani', 'bright', 'day', 'light', 'dikhayi', 'qeemat', 'darja', 'bandi', 'fashion', 'andaaz']
737	SU455FA18NJ18NAFAMZ	Butt	1326	2019-05-15	1	1	bohat bura tajurbah packing mein aib daar ghari wusool karna wapas kardiye gaye	Negative	['tajurbah', 'packing', 'aib', 'wusool', 'wapas', '']
738	MA305FA1KY528NAFAMZ	Aan	134	2018-04-23	4	1	safaid ki bajaye yeh peelay rang ka rang aata hai uch is hai	Positive	['safaid', 'peelay', 'rang', 'rang']
739	MA305FA1KY528NAFAMZ	Hassan	2115	2018-05-27	5	1	achay miyaar ki masnoaat ke sath achi service	Positive	['miyaar', 'masnoaat']
740	MA305FA1KY528NAFAMZ	muhammad raza iqbal	6928	2018-10-21	5	1	kya aik mukammal package qeemat se samaan taq jasamat aur rangon taq yeh behtareen baat hai mausam ke sath naram aur raahat bakhash mawaad asan aur lambai se aik kaamil size silai laganay ke liye mozoon koi shikayat nahi hain tasweer ke bilkul itnay hi rang mil ge hain mujhe mausam mein apni almaari mein iss terhan ke rang milnay par khushi hai	Positive	['mukammal', 'package', 'qeemat', 'samaan', 'jasamat', 'behtareen', 'mausam', 'naram', 'raahat', 'bakhash', 'asan', 'lambai', 'size', 'silai', 'mozoon', 'shikayat', 'tasweer', 'rang', 'mausam', 'rang', 'milnay', 'khushi', '']
741	SU455FA18NJ18NAFAMZ	MUDASSAR NAZAR	2895	2017-12-31	2	1	mein nai iss numeral ke aik se ziyada tukron ka order diya miyaar bohat acha nahi hai acha aur sajeela lagta hai lekin paidaar nahi hai iss nai aik mahinay ke baad kaam karna chore diya size meri kalayi mein foot nahi tha lehaza meri kalayi par baind ke mawaad ki raahat ki satah ke baray mein ziyada kuch nahi keh sakta	Negative	['tukron', 'order', 'miyaar', 'sajeela', 'paidaar', 'mahinay', 'size', 'kalayi', 'kalayi', 'baind', 'raahat', 'baray']
742	SU455FA18NJ18NAFAMZ	Jawad Hafeez	2468	2019-09-27	5	1	mera chhota bhai iss sports gharri ka istemaal kar raha hai aur usay yeh pasand hai qeemat ke muqablay mein yeh gharri meri tawaqqa se kahin ziyada achi hai iss ki roshni mein roshni roshan aur saaf hai majmoi tor par tajurbah itna achchca raha hai	Positive	['chhota', 'bhai', 'sports', 'pasand', 'qeemat', 'tawaqqa', 'kahin', 'roshni', 'roshni', 'roshan', 'saaf', 'majmoi', 'tor', 'tajurbah']
743	OA551FA1B35TGNAFAMZ	:@ :@ :@	25	2019-04-17	1	0	yeh bilkul achay nahi hain woh waqai mein buri terhan foot baithtay hain aur meri unglio ko pahannay ke baad waqai mein buri terhan se chout lagi hai mein usay aik sitara bhi nahi deta tha	Negative	['buri', 'pahannay', 'buri', 'sitara']
744	OA551FA1B35TGNAFAMZ	Avinash	1107	2019-12-15	4	0	un jooton ka yeh ab taq achha tajurbah raha hai iss terhan ki nahi jis terhan aap har roz pehnana pasand karen ge balkay unhein kurta ke neechay jummay ke liye ghasetein bohat achha lagta hai aur size bhi andar se mozoon hai	Positive	['tajurbah', 'roz', 'pehnana', 'pasand', 'kurta', 'neechay', 'size', 'mozoon']
745	OA551FA1B35TGNAFAMZ	Muhammad Ali Khan	3509	2018-11-22	3	0	itnay achay nahi jitne mein nai socha tha ke woh hon ge woh theek nazar atay hain lekin istemaal shuda chamray ka miyaar mujhe afsurdah kar raha hai kyunkay woh iss qisam ke miyaar nahi hain jis ko mein pehnana chahta hon mujhe lagta hai ke mein jitna ziyada pehnoon ga mazeed woh silai ke nuqta nazar se allag hona shuru kar dein ge	Neutral	['chamray', 'miyaar', 'qisam', 'miyaar', 'pehnana', 'chahta', 'silai']
746	PR384FA0UECYKNAFAMZ	Saad Ahmad	4621	2019-05-10	4	0	iss terhan ke aram da aur pursukoon fitting ke sath umdah quality dinm	Positive	['aram', 'pursukoon', 'fitting', 'umdah', 'quality']
747	PR384FA0UECYKNAFAMZ	babar	6402	2018-06-08	1	0	size bilkul ghalat hai bohat chhota kharab miyaar hai	Negative	['size', 'ghalat', 'chhota', 'miyaar']
748	MA305FA0YA7AENAFAMZ	Syed Faizan	5392	2019-07-19	5	0	qeemat ke mutabiq yeh waqai bohat zabardast hai mein nai pichlle saal khareedi thi aur ab bhi usay dosray saal mein istemaal kar raha hon kuch murammat ka kaam bhi sun hwa lekin theek hai iss ka mamool ka kaam iss qeemat mein yeh behtareen hai	Positive	['qeemat', 'zabardast', 'khareedi', 'dosray', 'qeemat', 'behtareen']
749	MA305FA0YA7AENAFAMZ	arham	6348	2019-10-18	5	0	iss qeemat mein achay miyaar ke hain shukriya daraz team	Positive	['qeemat', 'miyaar', 'team']
750	MA305FA0YA7AENAFAMZ	Bhatti	1268	2018-07-17	1	0	sirf aik baar ke istemaal ke l faz ki terhan karen	Neutral	[]
751	MA305FA0YA7AENAFAMZ	Khanzada	2643	2016-02-17	1	0	iss mein aik qabil reham miyaar hai aik dhoney ke baad yeh qabil nahi tha ke dobarah pehnein daraz ke sath yeh teesra bura tajurbah hai dobarah kabhi nahi khareedain ge	Negative	['qabil', 'reham', 'miyaar', 'dhoney', 'qabil', 'dobarah', 'tajurbah', 'dobarah']
752	MO114FA07TH2KNAFAMZ	Zaib	6057	2019-08-08	1	0	bi each tea samaan jacket ka upper si aayi chamray ke androoni samaan sasta hai lehaza nagawaar hon bohat ziyada nagawaar hon	Positive	['tea', 'samaan', 'jacket', 'upper', 'chamray', 'androoni', 'samaan', 'sasta']
753	MO114FA07TH2KNAFAMZ	Seven Star Enterprises	4971	2017-05-29	4	0	mukammal tor par kaamil size fitting aur rang kaamil	Positive	['mukammal', 'tor', 'size', 'fitting', 'rang']
754	MO114FA07TH2KNAFAMZ	Ã¯Â¹ÂºÃ£â‚¬â‚¬Ã£â‚¬â‚¬Ã£â‚¬â‚¬Ã£â‚¬â‚¬Ã£â‚¬â‚¬Ã£â‚¬â‚¬Ã£â‚¬â‚¬Ã£â‚¬â‚¬Ã£â‚¬â‚¬Ã£â‚¬â‚¬Ã£â‚¬â‚¬Ã£â‚¬â‚¬Ã£â‚¬â‚¬Ã£â‚¬â‚¬Ã£â‚¬â‚¬Ã£â‚¬â‚¬Ã£â‚¬â‚¬Ã£â‚¬â‚¬malikÃ£â‚¬â‚¬Ã£â‚¬â‚¬Ã£â‚¬â‚¬Ã£â‚¬â‚¬Ã£â‚¬â‚¬Ã£â‚¬â‚¬Ã£â‚¬â‚¬Ã¯Â¹Âº	7520	2016-11-12	5	0	kise ko k k bari m information chia ho aap	Neutral	['bari', 'information', '']
755	MO114FA07TH2KNAFAMZ	Hassan Nasir	2128	2016-12-25	1	0	mujhy wapis karni hai ya jcket	Neutral	['wapis']
756	AY536FA01RBGANAFAMZ	luqman	6809	2017-07-29	5	1	avki tane banay aur mawaad bhi iss mazmoon se mohabbat karte hain	Positive	['tane', 'mazmoon', 'mohabbat']
757	AY536FA01RBGANAFAMZ	Ibrahim	2244	2017-03-29	1	0	mustard boxer sharts raqam ka zaya kabhi nahi kharedtay hain	Negative	['mustard', 'boxer', 'sharts', 'raqam']
758	MO114FA0H33C0NAFAMZ	Nigah	4043	2016-05-14	3	0	abhi abhi masool sun hwa ghoont mein ykk zip tig ya naam talaash karne ke qabil nahi taham yeh iss ki asal qeemat se mutabqat nahi rakhta hai ya ho sakta hai ke mujhe ki chhuut ki wajah se kaam miyaar mila	Positive	['masool', 'zip', 'naam', 'talaash', 'qabil', 'asal', 'qeemat', 'mutabqat', 'wajah', 'miyaar']
759	MO114FA0H33C0NAFAMZ	ha	6573	2019-04-13	3	0	mein ne yeh apne show mein pehnaya yeh herat angaiz hai ke mein ne iss ki qeemat dollar ada kar di lekin mein har aik se behtar hon lehaza mein achay aur khobsorat im ko pasand karta hon sab se achay larke pehantay hain	Positive	['show', 'herat', 'angaiz', 'qeemat', 'dollar', 'khobsorat', 'pasand']
760	MO114FA0H33C0NAFAMZ	Jordan	2508	2017-03-10	5	0	size bilkul foot baithta hai aur chizen bhi bohat mutasir kin hoti hain waqai garam aur aram da un sab se barh kar	Negative	['size', 'baithta', 'chizen', 'mutasir', 'garam', 'aram']
761	MO114FA0H33C0NAFAMZ	Ali	589	2018-03-30	5	0	iss numeral ke baray mein jaizay parheen socha ke mujhe iss ki koshish karni chahiye kal jacket mili hai aur yeh behtar hai ke mein ne socha ke aisa hoga	Positive	['baray', 'koshish', 'jacket']
762	MO114FA0H33C0NAFAMZ	Syed Alyan	5377	2019-08-20	1	0	afsoosnaak tajurbah yeh jacket khareedna mein nay iss jacket ko kalay rang mein order kya tha aur unhon nay mujhe jacket bhuri rang mein bhaije thi aur yeh kisi chamray ki jacket nahi hai yeh khalis hai mawaad bohat naram hai ke usay aasani se ja sakta hai iss jacket ko khardney ka baad tareen tajurbah	Positive	['afsoosnaak', 'tajurbah', 'jacket', 'khareedna', 'jacket', 'kalay', 'rang', 'order', 'jacket', 'bhuri', 'rang', 'chamray', 'jacket', 'khalis', 'naram', 'aasani', 'jacket', 'khardney', 'tajurbah']
763	MO114FA0H33C0NAFAMZ	|k3R	7495	2016-03-15	3	0	sab se pehlay apne bhaiyon ki madad karne ke liye yeh jacket chamray ke bajaye khalis hai jo mein ne haal hi mein khareedi hai	Positive	['pehlay', 'madad', 'jacket', 'chamray', 'khalis', 'khareedi']
764	MO114FA0H33C0NAFAMZ	Waqar Ahmed	5879	2017-12-16	5	0	order ke din ke andar jacket mil gayi bilkul aisa hi lagta hai jaisay tasweeron mein dekhaya gaya hai behtareen miyaar garam naram aram da aur sajeela intehai sifarish ki gayi hai	Positive	['order', 'din', 'jacket', 'tasweeron', 'behtareen', 'miyaar', 'garam', 'naram', 'aram', 'sajeela', 'intehai', 'sifarish', '']
765	MO114FA1L5XM8NAFAMZ	atiya	6382	2019-09-18	5	0	mind baalo chalanay wali jacket mujhe waqai mein iss ke charon taraf pasand hai	Positive	['chalanay', 'jacket', 'taraf', 'pasand']
766	SU455FA18NJ18NAFAMZ	Saddam	4682	2016-05-31	3	1	mein ne usay namukammal ke sath wusool kya kyunkay pita holdr gayab hai	Negative	['wusool', 'holdr', 'gayab']
767	SU455FA18NJ18NAFAMZ	Zayad	6117	2016-10-26	4	1	wtch achi hai mujhe yeh pasand hai lekin mein yeh nahi jaanta ke hum kis terhan minute aur waqt ko adjust karen ge minute ko durust karne ka tareeqa aur sahih tareekh ko kis terhan adjust kya jaye thora sa farq taakay mein aap ko day raha hon	Positive	['wtch', 'pasand', 'jaanta', 'minute', 'waqt', 'adjust', 'minute', 'durust', 'tareeqa', 'adjust', 'day']
768	SU455FA18NJ18NAFAMZ	Wasee	5912	2017-08-02	5	1	acha lekin mein kaisay waqt badal sakta hon	Neutral	['kaisay', 'waqt', 'badal']
769	SU455FA18NJ18NAFAMZ	Ali Raza	628	2017-01-30	4	1	yeh mera pehla online kharidari ka tajurbah car tha iss terhan ke qabil qeemat qeemat ke liye yeh hai waqt aur tareekh aasani se te ki ja sakti hai	Positive	['pehla', 'online', 'kharidari', 'tajurbah', 'car', 'qabil', 'qeemat', 'qeemat', 'waqt', 'aasani']
770	SU455FA18NJ18NAFAMZ	Mujahid Hussain	3723	2018-09-29	5	1	mujhe waqai yeh pasand hai ghari qeemat ke liye waqai achi hai ghari ka miyaar bhi bohat aaccha hai aur design bhi bohat aaccha hai kyunkay aap ke paas ghari par yeh barray hindsay hain jo waqt ko zahir karte hain aur iss ki numaya alamat hain	Positive	['pasand', 'qeemat', 'miyaar', 'design', 'barray', 'hindsay', 'waqt', 'zahir', 'numaya']
771	SU455FA18NJ18NAFAMZ	Hafeez Ur Rehman	1951	2017-11-21	4	1	theek kaam karna waqt wazeer e azam ke liye dot aur baghair dekhata hai	Positive	['waqt', 'dot', 'baghair', 'dekhata']
772	TS571FA1EGQ7QNAFAMZ	Saad Ahmad	4621	2018-05-24	2	0	tasweer mein yeh sab kuch ura sun hwa hai aur thanda fitting hai haqeeqat mein yeh ghatiya se bhara sun hwa hai aur tane banay coat ki bajaye garam kameez ki terhan mehsoos hota hai agar aap ko garam rakhnay ke liye asal coat talaash kar rahay hain tu iss ki sifarish nahi karen ge	Positive	['tasweer', 'thanda', 'fitting', 'haqeeqat', 'tane', 'coat', 'garam', 'kameez', 'mehsoos', 'garam', 'asal', 'coat', 'talaash', 'sifarish']
773	MA305FA1KY528NAFAMZ	Ahmaed Shabbir	448	2017-05-10	4	1	mujhe qmizin khaas tor par un ke mawaad ka intikhab pasand hai kyunkay jab mein nay parcel khoola tu mein nay pehli baar check kya aur mehsoos kya aur jaisa ke site par dekha gaya rang bhi isi tarteeb mein thay mujhe yeh shirts payi jati hain kisi nah kisi terhan istemaal ke l quite bohat achcha hai aur kandhay aur seenay ke gird un ki fitting waqai achi hai	Positive	['qmizin', 'khaas', 'tor', 'pasand', 'parcel', 'check', 'mehsoos', 'site', 'dekha', 'rang', 'tarteeb', 'shirts', 'seenay', 'gird', 'fitting']
774	MA305FA1KY528NAFAMZ	Syed Salman Xaidi	5437	2016-09-07	4	1	abhi taq qmizin uch quality miyaar ki hain agarchay mujhe lagta hai ke kapaas khalis nahi hai balkay shayad star ya kisi aur cheez ka murakkab hai kyun ke khalis kapaas kaisa mehsoos nahi hota hai iss ke ilawa size aur sab mein mutmaen hon aur un shirts ny apna pehla dhona injaam diya hai aur rang koi sukarnay aur tane banay ki ahmiyat ke lehaz se zindah bach ge hain	Negative	['qmizin', 'quality', 'miyaar', 'kapaas', 'khalis', 'murakkab', 'khalis', 'kapaas', 'mehsoos', 'size', 'shirts', 'pehla', 'injaam', 'rang', 'sukarnay', 'tane', 'lehaz', 'zindah']
775	MA305FA1KY528NAFAMZ	Sami Goraya	4848	2018-09-05	5	1	yeh pack herat angaiz hai aur qabil qader mawaad ke sath samaan ka intikhab mutasir kin hai iss ki raahat bakhash aur naram roi thori si jarsi ke sath mera andaza hai jis se yeh phialta hai size mere jism mein bilkul foot baithta hai aur yahan taq ke dhoney ke baad bhi yeh skrh nahi paaya kkhuda ka shukar hai yeh meri almaari kaamil fitting saaf silai naram tane banay aur rang ki iss misali tagay…	Positive	['pack', 'herat', 'angaiz', 'qabil', 'qader', 'samaan', 'mutasir', 'raahat', 'bakhash', 'naram', 'thori', 'jarsi', 'andaza', 'size', 'jism', 'baithta', 'dhoney', 'paaya', 'shukar', 'fitting', 'saaf', 'silai', 'naram', 'tane', 'rang', 'misali', 'izafah', 'pasandeeda', 'rang', 'pack', 'aram', 'pursukoon', 'tor', 'thandak', 'behtareen', 'aitraaz', 'dinon', 'pasandeeda']
776	MA305FA1KY528NAFAMZ	Desu	1432	2017-09-01	4	1	hamesha ki terhan achi cheeze mujhe online shop par ziyada bharosa hai	Positive	['cheeze', 'online', 'bharosa']
777	MA305FA1KY528NAFAMZ	Hammad	2007	2017-09-10	4	1	yeh qmizin waqai achi hain aur kaamil size bhi mere nazdeek yeh sab kuch fitting ke baray mein hai aur mujhe yeh shirts kaamil foot ke sath mil gayeen shareek kashish dilkash aur tane banay bhi bohat achay hain aur jab mein usay pehanti hon tu achcha mehsoos hota hai	Positive	['qmizin', 'size', 'fitting', 'baray', 'shirts', 'kashish', 'dilkash', 'tane', 'mehsoos', '']
778	MA305FA16BB38NAFAMZ	shan	7218	2017-05-05	3	0	aik qabil qubool thi jabkay dosra mere size ka har gaz nahi tha	Neutral	['qabil', 'jabkay', 'size']
779	MA305FA16BB38NAFAMZ	Aamir	124	2019-05-07	5	0	bohat achi quality ka behtareen numeral mujhe yeh pasand hai	Positive	['quality', 'behtareen', 'pasand']
780	MA305FA16BB38NAFAMZ	Ali	589	2016-09-25	4	0	acha daraz ke zareya delivery waqt par hai thnx	Positive	['waqt']
781	MA305FA16BB38NAFAMZ	Muhammad	3482	2016-12-02	5	0	miyaar ki masnoaat sirf masla size ka hukum ghalat tha yeh bohat bara tha	Negative	['miyaar', 'masnoaat', 'masla', 'size', 'ghalat', 'bara']
782	MA305FA16BB38NAFAMZ	Abdullah	231	2017-06-02	4	0	iss qeemat par miyaar vaqata good uch is hai lekin mein ne darmiyanay size ke bajaye x ail wusool kya jis ka mein ne hukum diya	Positive	['qeemat', 'miyaar', 'vaqata', 'good', 'darmiyanay', 'size', 'wusool', '']
783	AY536FA01RBGANAFAMZ	Tayyab	5586	2018-09-30	5	0	waqt aur maday se bazyaft karna baichnay walay ki tareef karna acha hai	Positive	['waqt', 'maday', 'baichnay', 'tareef']
784	PR384FA0UCUQ2NAFAMZ	adil	6260	2019-03-09	5	0	yeh jaiza likhte waqt mein ne yeh jacket pehan rakhi hai aur iss jacket ko bananay mein istemaal honay walay maday se bohat mutmaen hon quality size waghera har cheez kaamil hai thanx ta daraz	Positive	['waqt', 'jacket', 'pehan', 'jacket', 'bananay', 'maday', 'quality', 'size']
785	PR384FA0UCUQ2NAFAMZ	Talha	5530	2019-01-26	1	0	istemaal shuda mawaad tasweer se mukhtalif hai haath ki khansi mein baind wala button nahi hota hai aur fitting bilkul bhi patli nahi hoti hai acha tajurbah nahi yahan tak ke kisi achay design ki copy nahi kar saktay hain	Positive	['tasweer', 'mukhtalif', 'haath', 'baind', 'button', 'fitting', 'patli', 'tajurbah', 'design', 'copy']
786	PR384FA0UCUQ2NAFAMZ	zain	7457	2018-08-20	5	0	ig iss rang ko dastyab hai plz iss ki doosri soorat mein siyah hai	Neutral	['rang', 'dastyab', 'doosri', 'siyah']
787	BN244FA0FYNPINAFAMZ	Irfan	2341	2018-12-16	1	0	size aur rang nahi jaisa ke mein ne hukum diya hai	Neutral	['size', 'rang']
788	AY536FA04VR1WNAFAMZ	Samad	4821	2017-08-28	5	0	achi jacket mein dobarah iss jacket ko order karna chahta hon	Positive	['jacket', 'dobarah', 'jacket', 'order', 'chahta']
789	AY536FA04VR1WNAFAMZ	Sohail	5294	2018-11-03	5	1	mein mayaari masnoaat se mutmaen hon	Neutral	['mayaari', 'masnoaat']
790	AY536FA04VR1WNAFAMZ	Sadam	4679	2017-08-18	5	0	susti qeemat mein bohat achi mein faisla karta hon ke mein hamesha daraz par online order dun	Positive	['susti', 'qeemat', 'online', 'order', '']
791	AY536FA04VR1WNAFAMZ	Murtaza	3775	2016-05-04	3	0	mein ne socha ke gallery mein dekhaya gaya rang isi terhan ka hoga lekin iss ka rang ziyada gehra hai har terhan ke miyaar ki masnoaat achi lagti hai lekin baichnay walay ko masnoaat ki asal rangat zaroor dikhani chahiye	Positive	['gallery', 'rang', 'rang', 'miyaar', 'masnoaat', 'baichnay', 'masnoaat', 'asal', 'rangat']
792	AY536FA04VR1WNAFAMZ	Atif	1079	2017-12-18	1	0	daraz mein bohat sust raftaar hai delivery daraz se kuch nah khareedain	Negative	['sust', 'raftaar']
793	AY536FA04VR1WNAFAMZ	Naveed	3979	2016-09-09	3	0	mein daraz se libaas mein koi cheez nahi khareedon ga	Positive	['libaas', 'khareedon']
794	SU455FA18NJ18NAFAMZ	Sanaullah Khan	4877	2018-04-17	4	1	theek hai jab aap ko itni achi qeemat par iss terhan ki umdah sports gharri mil rahi hai tu yeh vaqata aik chori hai yeh bilkul aisa hi tha jaisay usay yahan numeral ke display par dekhaya gaya tha aur yeh pehnana bhi asan tha aur lead display bhi aasani se dikhayi deta hai aur pahannay par bhi bohat ahcha lagta hai	Positive	['qeemat', 'umdah', 'sports', 'vaqata', 'display', 'pehnana', 'asan', 'lead', 'display', 'aasani', 'dikhayi', 'pahannay']
795	SU455FA18NJ18NAFAMZ	Asad	966	2018-09-24	4	0	aisa lagta hai ke munasib tareeqay se kaam kar raha ho khelon ke libaas mein zabardast kuch bhi nahi uch ie terhan se bhi pehna ja sakta hai	Positive	['munasib', 'tareeqay', 'khelon', 'libaas', 'zabardast']
796	SU455FA18NJ18NAFAMZ	Bilal	1273	2016-03-21	4	1	iss qeemat ki hadd mein achi masnoaat	Positive	['qeemat', 'masnoaat']
797	SU455FA18NJ18NAFAMZ	Abrar	290	2018-03-03	5	0	mein ne ghari bazyaft ki hai bachon ke liye achi nigah	Positive	['nigah']
798	SU455FA18NJ18NAFAMZ	rauf	7069	2019-12-15	4	0	jis terhan se hum ghari ka size adjust karte hain	Neutral	['size', 'adjust']
799	SU455FA18NJ18NAFAMZ	Umair	5666	2016-03-25	5	0	tu mein ne sirf din ke baad yeh wusool kya un mein se ka hukum diya tamam ghariyaan achi aur kaam karne ki haalat mein mil gayeen gharri bohat sajeela hai aur yeh foot butt heart monitor ki terhan lagta hai agarchay plastic ki kalayi ka band haath ke gird modna bohat mushkil hai aur iss ko maqnatees lock mil gaya hai lehaza iss baat ka yaqeen nahi hai ke motorcycle par sawaar honay ke douran yeh …	Positive	['din', 'wusool', 'tamam', 'ghariyaan', 'haalat', 'sajeela', 'heart', 'monitor', 'plastic', 'kalayi', 'band', 'haath', 'gird', 'mushkil', 'maqnatees', 'lock', 'yaqeen', 'douran', 'mehfooz', 'qeemat']
800	SU455FA18NJ18NAFAMZ	Daraz user	1420	2019-06-23	5	0	umdah qeemat aur aik bohat madadgaar numeral	Positive	['umdah', 'qeemat', 'madadgaar']
801	MO114FA03ZK0WNAFAMZ	Rehan	4448	2016-11-20	4	0	jaisa ke iss ka ghalat chamra asli chamray ka nahi hai mein ne jacket haasil karne ke baad iss qisam ke chamray ke baray mein seekha herat hui jaisa ke mein ne socha tha ke mein chamray ki masnoaat khareed raha hon takmeel achi hai	Negative	['ghalat', 'asli', 'chamray', 'jacket', 'haasil', 'qisam', 'chamray', 'baray', 'herat', 'chamray', 'masnoaat', 'takmeel']
802	TS571FA1KF29INAFAMZ	Saad Ahmad	4621	2016-11-29	2	0	tasweer mein yeh sab kuch ura sun hwa hai aur thanda fitting hai haqeeqat mein yeh ghatiya se bhara sun hwa hai aur tane banay coat ki bajaye garam kameez ki terhan mehsoos hota hai agar aap ko garam rakhnay ke liye asal coat talaash kar rahay hain tu iss ki sifarish nahi karen ge	Positive	['tasweer', 'thanda', 'fitting', 'haqeeqat', 'tane', 'coat', 'garam', 'kameez', 'mehsoos', 'garam', 'asal', 'coat', 'talaash', 'sifarish']
803	MO114FA03ZK0WNAFAMZ	Muhammad Amjad	3514	2017-01-04	5	0	black charmi jacket aik qeemat ke tor par fashion ke tor par kaamil hai kyun ke sardiyoon ke session se iss ki hifazat nahi ki ja sakti hai	Neutral	['black', 'jacket', 'qeemat', 'tor', 'fashion', 'tor', 'sardiyoon', 'session', 'hifazat']
804	MO114FA03ZK0WNAFAMZ	Zain Baig	6070	2017-02-22	5	0	umdah miyaar aur dem jaisay dikhayi gayi tasweeron mein	Negative	['umdah', 'miyaar', 'dikhayi', 'tasweeron']
805	MO114FA03ZK0WNAFAMZ	usman haider	7377	2019-08-17	5	0	jacket larkoon mein bohat umdah tasweer mein dukhaay jane ke barabar hi sab kuch hai	Positive	['jacket', 'umdah', 'tasweer', 'dukhaay']
806	MA305FA1KY528NAFAMZ	Dildar Masud	1438	2018-06-17	5	1	mein ne yeh package khareeda hai jahan tak qeemat ke muqablay mein iss ke miyaar ka talluq hai miyaar behtareen hai mein usay khareedne ki tajweez karta hon	Positive	['package', 'qeemat', 'miyaar', 'miyaar', 'behtareen', 'khareedne', 'tajweez']
807	MA305FA1KY528NAFAMZ	hina timothy	6632	2017-04-12	4	0	yeh qmizin iss mausam garma mein meri jane wali hain rangeen tagayur ny mujhe bohat mutasir kya aur mujhe order dainay ka lalach diya aur ab mein un ko haasil karne ke baad vaqata satisfied mutmaen hon kyunkay samaan bohat naram hai aur mein un mein arram da mehsoos karta hon yeh misali tor par foot baithta hai aur un mein itna raahat mehsoos hota hai ke sirf silai uchalnay ka miyaar khatam hota …	Neutral	['qmizin', 'mausam', 'garma', 'rangeen', 'mutasir', 'order', 'haasil', 'vaqata', 'satisfied', 'samaan', 'naram', 'mehsoos', 'misali', 'tor', 'baithta', 'raahat', 'mehsoos', 'silai', 'miyaar', 'khatam']
808	MA305FA1KY528NAFAMZ	Moazam Malik	3193	2018-12-08	4	0	yeh qmizin bohat achi aur sabhi hain lekin un ka rang ka miyaar bohat aaccha nahi hai mein nai siyah rang ka rang istemaal kya hai usay dho liya hai lekin rang qadray madham par gaya hai mein nai un mein se abhi taq koshish nahi ki hai lekin dosray ki terhan lagta hai aram da aur pursukoon foot	Positive	['qmizin', 'rang', 'miyaar', 'siyah', 'rang', 'rang', 'rang', 'qadray', 'koshish', 'dosray', 'aram', 'pursukoon']
809	MA305FA1KY528NAFAMZ	Tabish Shah	5490	2019-05-10	4	1	yeh mausam garma ke l aas aik umdah darja bandi hai cheezian waqai naram aur aram da hain mujhe mehsoos hota hai ke mein un tea shirts mein ghoom raha hon size itna durust hai aur mere jism ko bilkul foot baithta hai jahan tak silai hai yeh hona chahiye thora sa saaf suthra samnay arhay hain unhein aik ghair sanjeeda shakal day rahay hain	Negative	['mausam', 'garma', 'umdah', 'darja', 'bandi', 'naram', 'aram', 'mehsoos', 'tea', 'shirts', 'ghoom', 'size', 'durust', 'jism', 'baithta', 'silai', 'saaf', 'samnay', 'shakal', 'day']
810	MA305FA1KY528NAFAMZ	Nouman Shah	4108	2019-09-05	5	1	mujhe yeh shirts achi terhan se bhari hui mili hain aur andar ke hisson ki terhan hi website par dekhaya gaya tha itnay naram aur achay hue mein un sab se pyar karta hon woh mujh par waqai achay lagtay hain aur achi terhan se foot bhi hain	Positive	['shirts', 'bhari', 'website', 'naram', 'pyar', '']
811	MA305FA1KY528NAFAMZ	Dont buy	1450	2017-03-21	1	0	kharab tareen miyaar woh bhi nahi dekhte jo tasweer mein dukhaay gaye rangon ko bheja jata hai bohat kharab hai sirf iss ke baad ke usay dobarah istemaal mein laya ja wash dhoney ke baad bhi darja bandi se dhoka nahi hota hai	Negative	['miyaar', 'tasweer', 'dukhaay', 'dobarah', 'wash', 'dhoney', 'darja', 'bandi', 'dhoka']
812	MA305FA1KY528NAFAMZ	Kashan Aslam	2592	2017-05-28	4	1	mujhe yeh shirts pasand hain yeh aik zabardast pack hai aur iss mein rangon se ziyada hai jo mujhe apni taraf raghib karte hain lekin size fitting ke sath sath kapaas ke miyaar ko bhi woh iss ko aik mutasir kin pack banatay hain mein iss terhan har roz karta hon aur surkh mere night suit ki terhan hai	Positive	['shirts', 'pasand', 'zabardast', 'pack', 'taraf', 'size', 'fitting', 'kapaas', 'miyaar', 'mutasir', 'pack', 'roz', 'night', 'suit', '']
813	MA305FA1KY528NAFAMZ	muhammad mubarak ali	6926	2019-08-06	5	0	mein nai un se yeh aram da aur pursukoon honay ki tawaqqa nahi ki zabardast chezay maadi aur naqaab saazi woh mujhe achi terhan se foot karte hain aur agar mein un ke paas aur hota tu mein unhein du angothon se ziyada day sakta hon p rangeen miyaar itna hi durust hai jitna ke website aur online khorda ke baarey mein mera aetmaad das gina barh gaya hai	Positive	['aram', 'pursukoon', 'tawaqqa', 'zabardast', 'naqaab', 'angothon', 'day', 'rangeen', 'miyaar', 'durust', 'website', 'online', 'aetmaad']
814	BN244FA0F9MH2NAFAMZ	Ahtisham	513	2018-05-24	5	0	daraz mein sab se acha soda	Positive	['soda']
815	BN244FA0F9MH2NAFAMZ	Masroor	3062	2017-04-08	3	0	miyaar theek hai lekin libaas bohat patla hai iss ko qadray ghany hona chahiye thay	Positive	['miyaar', 'libaas', 'patla', 'qadray', 'ghany']
816	MA305FA16BB38NAFAMZ	Mohammad	3211	2020-01-11	5	0	mein nay jo hukum diya woh miyaar mila jis mein uch and tha aur koi pareshani nahi thi aur dono ke rang achay aur kaamil hain	Negative	['miyaar', 'pareshani', 'rang']
817	MA305FA16BB38NAFAMZ	Talha	5530	2019-12-12	4	0	masnoaat ki qeemat par ghhor karte hue miyaar bohat acha hai mujhe numeral pasand hai	Positive	['masnoaat', 'qeemat', 'miyaar', 'pasand']
818	MA305FA16BB38NAFAMZ	Iftkhar	2264	2019-03-24	4	0	cheeze achi hain silai ko behtar bananay ki zaroorat hai	Positive	['cheeze', 'silai', 'bananay', 'zaroorat']
819	MA305FA16BB38NAFAMZ	Usman Ul Haq	5773	2019-09-26	5	0	rang se pyar karen yeh aik bohat hi markazi dhaaray ka rang hai jo kisi dosray rang ke sath pehnana munasib hai lehaza mein har waqt un mein se aik pehnay hue hon	Positive	['rang', 'pyar', 'dhaaray', 'rang', 'dosray', 'rang', 'pehnana', 'munasib', 'waqt', 'pehnay']
820	MA305FA16BB38NAFAMZ	Marium hafeez	3041	2018-04-27	4	0	thisishypenhere bohat achha	Positive	[]
821	AY536FA1JBKTANAFAMZ	Shehroze	5172	2016-04-04	5	0	market mein behtareen aur sab se achi baat taakay hai aam ke bi each bhi wohi pehanti hai	Positive	['market', 'behtareen']
822	AY536FA1JBKTANAFAMZ	Usama	5741	2016-05-21	4	0	bus lais sahi nahi magar quality great thanda motai mein bohat acha	Positive	['bus', 'lais', 'quality', 'thanda', 'motai']
823	AY536FA1JBKTANAFAMZ	Syed	5361	2017-11-09	5	1	achi terhan se acha mawaad aur aik zabardast design online shopping malbosaat ka majmoi tor par mera aik behtareen tajurbah raha hai	Positive	['zabardast', 'design', 'online', 'shopping', 'majmoi', 'tor', 'behtareen', 'tajurbah']
824	AY536FA1JBKTANAFAMZ	H.M. Nawaz	1916	2019-01-07	4	0	online shopping par meri yeh pehli baar hai aur mujhe acha lagta hai ke numeral achi hai aur tasweer ki terhan nazar aa rahi hai sirf halkay size ke maslay par x ail par size chhota hai tamam mutasir kin masnoaat ko behtar banayen	Positive	['online', 'shopping', 'tasweer', 'size', 'maslay', 'size', 'chhota', 'tamam', 'mutasir', 'masnoaat']
825	AY536FA1JBKTANAFAMZ	Shani	5121	2018-10-08	5	0	bohat acha mawaad aur bohat achi kharidari waqt ki fori farahmi sirf daidh din khushi hai ke yeh hain aur mein bohat mutmaen hon	Positive	['kharidari', 'waqt', 'farahmi', 'din', 'khushi']
826	AY536FA1JBKTANAFAMZ	Ahmed Ali	453	2018-10-16	5	0	shukriya daraz mujhe achay miyaar ka order mila	Positive	['miyaar', 'order']
827	AY536FA1JBKTANAFAMZ	Shahbaz	5020	2019-03-29	5	0	iss qeemat mein miyaar waqai uch is hai	Positive	['qeemat', 'miyaar']
828	AY536FA1JBKTANAFAMZ	Hamad	1997	2016-08-24	5	0	susti qeemat mein bohat achi masnoaat	Positive	['susti', 'qeemat', 'masnoaat']
829	TS571FA09DTH2NAFAMZ	Danish Mehboob	1402	2016-08-19	1	0	coat ka miyaar kharab hai aur tankay bhi achay nahi hain	Negative	['coat', 'miyaar', 'tankay']
830	TS571FA09DTH2NAFAMZ	Ishtiaq khan	2385	2019-06-13	3	0	miyaar acha nahi hai takmeel karna bhi acha nahi hai	Neutral	['miyaar', 'takmeel']
831	DE901FA19VWKMNAFAMZ	Zstunning	6179	2016-03-19	3	0	superman par pabandi	Positive	['']
832	BN244FA1KG4UENAFAMZ	Hashim Ali	2097	2018-04-19	5	0	munasib silai ke sath qeemat ke lehaz se masnoaat achi hai	Positive	['munasib', 'silai', 'qeemat', 'lehaz', 'masnoaat']
833	BN244FA1KG4UENAFAMZ	Noman	4066	2016-04-16	1	0	iss ko itna sasta baichnay ke bajaye yeh behtar hota ke packing walay log x ail aur ail ke darmiyan farq dekhnay ke liye kaafi achay hotay	Positive	['sasta', 'baichnay', 'packing', 'log']
834	SU455FA18NJ18NAFAMZ	M junaid	2781	2018-01-04	1	0	mein ne haal hi mein aik black ghari khareedi hai lekin iss ke khaliye kaam thay aur kaam khalion ki wajah se iss ke lambay hissay kaam nahi kar rahay hain	Negative	['black', 'khareedi', 'khalion', 'wajah', 'lambay', 'hissay', '']
835	SU455FA18NJ18NAFAMZ	Tauqeer	5580	2016-06-22	5	0	yeh bohat achi numeral hai star numeral	Positive	[]
836	SU455FA18NJ18NAFAMZ	aamir sajjad	6223	2017-02-20	1	0	yeh kharidari bohat mayoos kin thi kyunkay mujhe woh numeral nahi mila jis ka mein ne order kya tha lehaza mein ne mehsoos kya ke iss ka tazkara karna chahiye kyunkay mujhe iss kalayi gharri ke bajaye ail dd mili hai jo mein apne bache ke liye order dena chahta tha jo waqai mayoos kin tha	Negative	['kharidari', 'mayoos', 'order', 'mehsoos', 'kalayi', 'bache', 'order', 'chahta', 'mayoos']
837	SU455FA18NJ18NAFAMZ	muhammad afaq	6920	2017-06-21	4	0	achi terhan se iss gharri ke miyaar ke sath kisi bhi maslay ka saamna nahi karna para agarchay yeh muqami bazaaron mein bhi dastyab hai lekin mein sirf online shopping ka tajurbah karna chahta tha aur yeh mere liye aik maqool tajurbah tha	Neutral	['miyaar', 'maslay', 'saamna', 'muqami', 'dastyab', 'online', 'shopping', 'tajurbah', 'chahta', 'tajurbah']
838	SU455FA18NJ18NAFAMZ	Saad farooq	4644	2019-05-11	5	0	bohat achay miyaar ke apne doston ke liye mazeed khareeda	Positive	['miyaar']
839	MA305FA1KY528NAFAMZ	Ahmad	430	2016-11-11	5	0	bht zbrdst t shirts hyn bht aawaw	Positive	['zbrdst', 'shirts']
840	MA305FA1KY528NAFAMZ	Sad	4673	2017-03-03	3	0	yeh qmizin achi lag rahi hain aur sab kuch lekin tane banay bohat naram aur halkay hain aur thora sa paidaar nahi hain mujhe khushi hai ke aap logon ko sahih size mil gaya lekin tane banay ka miyaar mujhe kabhi bhi iss se ziyada baar pahannay par majaboor karta hai	Positive	['qmizin', 'tane', 'naram', 'paidaar', 'khushi', 'logon', 'size', 'tane', 'miyaar', 'pahannay']
841	MA305FA1KY528NAFAMZ	behroz ali	6423	2018-04-08	4	0	mujhe iss package mein mojood tamam shirts bohat pasand hain aur un ke rangon ne mujhe sab se ziyada mutwajjah kya mein waqai mein iss baat se mutmaen hon ke kapra kitna acha mehsoos karta hai khaas tor par garmiyon mein kapaas ka naram aur paidaar banaya gaya hai mujhe yeh pasand hai ke iss se mujhe faida hota hai aur siyah sab se behtar lag raha hai	Positive	['package', 'mojood', 'tamam', 'shirts', 'pasand', 'mutwajjah', 'kapra', 'mehsoos', 'khaas', 'tor', 'garmiyon', 'kapaas', 'naram', 'paidaar', 'banaya', 'pasand', 'faida', 'siyah', '']
842	MA305FA1KY528NAFAMZ	Usman Rasheed	5770	2018-02-18	4	0	pakistan mein meri pehli online shopping mein herat se un umdah samaan se heran tha jis ki mujhe umeed nahi thi rang bohat achay thay lekin sirf mein qabil zikar quality tea shirts ka hona herat zada hai lekin daraz dspich aur shipping service bohat kharab hai mein chhootey size mein aur darmiyanay size mein order kya gaya tha lekin mujhe barray size mein sirf aik pack mila tha	Negative	['online', 'shopping', 'herat', 'umdah', 'samaan', 'heran', 'umeed', 'rang', 'qabil', 'quality', 'tea', 'shirts', 'herat', 'chhootey', 'size', 'darmiyanay', 'size', 'order', 'barray', 'size', 'pack', '']
843	MA305FA1KY528NAFAMZ	Adeel Tareen	328	2016-12-18	5	0	un shirts mein umdah miyaar ki roi hoti hai aur zabardast silai hoti hai jis se yeh paidaar aur kandhoon aur seenay ke gird bilkul foot hojata hai rang ka miyaar bhi bohat ameer aur behtar hai aur majmoi tor par khidmat ke sath sath yeh qmizin har jagah istemaal ki ja sakti hain mein iss pack paish karta hai mukhtalif qisam ke se mohabbat karta hon	Positive	['shirts', 'umdah', 'miyaar', 'zabardast', 'silai', 'paidaar', 'seenay', 'gird', 'rang', 'miyaar', 'majmoi', 'tor', 'khidmat', 'qmizin', 'pack', 'mukhtalif', 'qisam', 'mohabbat', '']
844	MA305FA1KY528NAFAMZ	Rao Nadir	4409	2016-08-28	5	0	samaan acha hai lekin masla hai ke woh mujhe safaid ki jagah peelay rang bhaijtay hain	Positive	['samaan', 'masla', 'safaid', 'peelay', 'rang', 'bhaijtay']
845	MA305FA1KY528NAFAMZ	Aun	1100	2018-09-21	1	0	mein ne jaali saazi ki numayesh karte hue wazeh tor par tasaveer paish ki tea shirts behtareen miyaar ke thay lekin iss ka label phataa sun hwa tha aur iss ke oopar x ail astikr chaspan kya gaya tha	Neutral	['jaali', 'numayesh', 'wazeh', 'tor', 'tasaveer', 'tea', 'shirts', 'behtareen', 'miyaar', 'label', 'phataa']
846	BN244FA1EX2Y6NAFAMZ	Noman Asghar	4067	2020-01-08	5	0	chez achi h aur keemat b munasib hai	Positive	['keemat', 'munasib']
847	MA305FA16BB38NAFAMZ	Qaiser Khan	4216	2018-03-03	4	0	bhuri rang aur siyah rang se pyar karna yeh mere bohat saaray kapron ke sath jata hai iss ke ilawa gehray rang aam tor par meri jald ke sath uch ie hotay hain	Positive	['bhuri', 'rang', 'siyah', 'rang', 'pyar', 'kapron', 'rang', 'tor']
848	MA305FA16BB38NAFAMZ	Moazzam Khan	3195	2019-10-10	5	0	yeh dono jackets bohat uch fit foot hain aur mein mad of ke intikhab se bohat khush hon waqai mein garam aur rangon mein jo hain aur har rang ke sath iss ki tareef ki gayi hai	Positive	['jackets', 'fit', 'mad', 'khush', 'garam', 'rang', 'tareef', '']
849	MA305FA16BB38NAFAMZ	hasnain mirza	6617	2017-08-18	4	0	dono se mutmaen agarchay aik kaali rang ka rang dhundlaa sun hwa lagta hai quality uch and aur garam hai agarchay tareef	Positive	['rang', 'rang', 'dhundlaa', 'quality', 'garam', 'tareef', '']
850	MA305FA16BB38NAFAMZ	Zuhair Rasheed	6192	2018-04-29	4	0	dono head achi aur aram da hain khush hai ke unhon nay sahih size diya yeh siyah faam thora bara hai lekin mere liye koi masla nahi hai garam aram da aur har terhan ki aqsam ke sath uch good hai kapray	Positive	['head', 'aram', 'khush', 'size', 'siyah', 'bara', 'masla', 'garam', 'aram', 'aqsam', 'good', 'kapray']
851	MA305FA16BB38NAFAMZ	Rana Wadood	4394	2017-08-22	1	0	chez achi ny hai	Positive	[]
852	MA305FA16BB38NAFAMZ	Bilawal	1295	2016-03-17	1	0	mein ne siyah aur bhuri rang ka order diya lekin kalay rang ko bar amad nahi kya	Negative	['siyah', 'bhuri', 'rang', 'order', 'kalay', 'rang']
853	MA305FA16BB38NAFAMZ	Jutt	2527	2018-10-30	5	0	dono bohat achay hain aur mein vaqata them inhen pasand karta hon	Positive	['vaqata', 'pasand']
854	AY536FA183EKENAFAMZ	Nafees	3904	2018-12-11	1	0	wohi nahi tha jaisa ke sweet shirt se bhi ziyada dekhaya gaya aur patla tha	Neutral	['sweet', 'patla']
855	AY536FA183EKENAFAMZ	Haris	2064	2016-02-11	5	0	tane banay uch to hai aur iss ka mad hay bohat herat angaiz hai	Positive	['tane', 'mad', 'herat', 'angaiz']
856	AY536FA183EKENAFAMZ	Faizan	1659	2017-07-06	5	0	awsome hoodie mujhe order achi cheeze mili hain	Positive	['awsome', 'hoodie', 'order', 'cheeze']
857	AY536FA183EKENAFAMZ	Bilal	1273	2016-02-17	5	1	umdah aur umdah achay miyaar	Neutral	['umdah', 'umdah', 'miyaar']
858	AY536FA183EKENAFAMZ	Hamza	2020	2017-11-21	3	1	jaisa ke iss ki qeemat ka mawazna karen lekin acha nahi	Neutral	['qeemat', 'mawazna']
859	AY536FA183EKENAFAMZ	kamran khan	6753	2018-07-06	5	0	iss hoodie aala miyaar bohat achay se mohabbat karta hon	Positive	['hoodie', 'miyaar', 'mohabbat']
860	AY536FA1JBKTANAFAMZ	Alishah Sagani	669	2016-08-06	5	0	ki tarseel hoodie ke herat angaiz miyaar iss se behtar nahi ho sakta tha usay pyar kya tum log daraz ka asasa ho bohat bohat shukriya intehai sifarish shuda	Positive	['hoodie', 'herat', 'angaiz', 'miyaar', 'pyar', 'log', 'intehai', 'sifarish', '']
861	AY536FA1JBKTANAFAMZ	zain	7457	2016-09-02	5	0	achi chez hai mujhy psnd hai aur keemat b kaam h kaafi	Positive	['psnd', 'keemat']
862	AY536FA1JBKTANAFAMZ	suhaib	7282	2016-10-26	5	0	mein har sexy larke ko yeh khareedne ke liye bazyaft karta hon ke woh mujhe sexy sexy nazar ayen ge	Neutral	['sexy', 'khareedne', 'sexy', 'sexy']
863	AY536FA1JBKTANAFAMZ	Taimoor	5516	2016-02-09	4	0	chez achi hai service b achi h inn ki	Negative	[]
864	AY536FA1JBKTANAFAMZ	umer	7358	2016-07-14	5	0	mein order karta hon lekin un mein se aik ka rang badal gaya hai	Negative	['order', 'rang', 'badal']
865	AY536FA1JBKTANAFAMZ	waqas	7410	2016-10-14	4	0	mujhe cheeze pasand hain aur majmoi tor par masnoaat achi hai usay jari rakhen	Positive	['cheeze', 'pasand', 'majmoi', 'tor', 'masnoaat']
866	AY536FA1JMH38NAFAMZ	Waheed	5838	2017-09-06	5	0	mujhe jacket ka samaan aur fitting pasand hai	Positive	['jacket', 'samaan', 'fitting', 'pasand']
867	AY536FA1JMH38NAFAMZ	M.Aslam	2824	2019-08-09	5	0	mein ne jo hukum diya wohi mila jo miyaar uch good tha aur koi harj nahi aur kaamil size ka rang acha aur kaamil hai	Positive	['miyaar', 'good', 'size', 'rang']
868	AY536FA1JMH38NAFAMZ	zeeshan	7471	2018-06-10	5	0	bohat achi jacket aur achay tane banay shukriya daraz	Positive	['jacket', 'tane', '']
869	AY536FA1JMH38NAFAMZ	Haseeb	2089	2016-09-08	4	0	item design bilkul wohi nahi hai jis terhan paish kya gaya ho majmoi tor par achi lagti hai lekin jaib ke ko silna chahiye tha	Negative	['design', 'majmoi', 'tor', 'jaib', 'silna']
870	SU455FA18NJ18NAFAMZ	Afraz	394	2018-09-28	4	1	item design bilkul wohi nahi hai jis terhan paish kya gaya ho majmoi tor par achi lagti hai lekin jaib ke ko silna chahiye tha	Negative	['design', 'majmoi', 'tor', 'jaib', 'silna']
871	SU455FA18NJ18NAFAMZ	Huzaifa Ahmed	2218	2018-08-22	1	0	mein nay du ghrhyon ka order diya aur un mein se aik ko nuqsaan pouncha sanjeedgi se yeh baad tareen tajurbah tha	Positive	['order', 'nuqsaan', 'tajurbah']
872	SU455FA18NJ18NAFAMZ	Abdullah	231	2016-04-20	5	0	aik bohat hi munasib qeemat ke sath aik achi masnoaat	Positive	['munasib', 'qeemat', 'masnoaat']
873	SU455FA18NJ18NAFAMZ	shujaat mehdi	7249	2017-03-06	4	1	yeh mere liye aik achh experience tajurbah raha hai qeemat ke lehaz se iss numeral ka miyaar bhi acha tha miyaar bhi acha tha lehaza mein vaqata this yeh taqreeban stars setaaray doun ga miyaar aur hi wahid cheez thi jis ki kami thi	Positive	['experience', 'tajurbah', 'qeemat', 'lehaz', 'miyaar', 'miyaar', 'vaqata', 'taqreeban', 'setaaray', 'miyaar', 'wahid', 'kami']
874	SU455FA18NJ18NAFAMZ	Ahmad	430	2017-11-15	5	0	munasib qeemat par behtareen ail dd watch	Positive	['munasib', 'qeemat', 'behtareen', 'watch']
875	SU455FA18NJ18NAFAMZ	Ã˜ÂµÃ˜Â§Ã™â€žÃ˜Â­ Ã˜Â±Ã˜Â­Ã™â€¦Ã˜Â§Ã™â€ Ã›Å’	7509	2017-02-04	5	1	qeemat ke silsilay mein masnoaat ke miyaar ke lehaz se iss gharri ke sath mera tajurbah achcha raha hai masnoaat khud miyaar ke lehaz se bhi bohat umdah hai aur yeh achi terhan se mohazab bhi nazar aati hai iss ki tadaad bhi kaafi numaya hai aur aap kar satke hain aasani se iss gharri ke sath waqt dekhen	Positive	['qeemat', 'masnoaat', 'miyaar', 'lehaz', 'tajurbah', 'masnoaat', 'miyaar', 'lehaz', 'umdah', 'tadaad', 'numaya', 'aasani', 'waqt']
876	MA305FA1KY528NAFAMZ	Bilal Ali	1277	2016-08-18	4	0	yeh qmizin lajawab hain aur cheeze bohat achi hain yeh mujh par waqai naram mehsoos karti hain mujhe tamam rang waqai achh and aur roshan bhi maloom hotay hain mein iss mausam ke l single kuch aik tund shirt ki talaash kar raha tha aur daraz dot pi ke nai iss baat ko yakeeni banaya mein nai aur kahin nahi dekha bohat bohat shukriya larkoon	Positive	['qmizin', 'lajawab', 'cheeze', 'naram', 'mehsoos', 'tamam', 'rang', 'roshan', 'maloom', 'mausam', 'single', 'tund', 'talaash', 'dot', 'banaya', 'kahin', 'dekha']
877	MA305FA1KY528NAFAMZ	Bilal Ali brohi	1278	2018-06-04	4	0	tamam shirts mein se yeh pack behtareen hai iss mein se aik intahi aram da aur pursukoon shirt mein se mujhe mil sakta hai aur woh mujhe dhoop mein bohat ziyada garam nahi banatay hain ya tu halki pan ka shukriya yeh paanchon rang waqai purkashish hain aur jab bhi dhotay hain tu un se chotay hi nahi hain mein isi miyaar ki tawaqqa kar raha tha jis ki farahmi hui thi lehaza mein mukammal tor par m…	Positive	['tamam', 'shirts', 'pack', 'behtareen', 'aram', 'pursukoon', 'dhoop', 'garam', 'halki', 'rang', 'purkashish', 'chotay', 'miyaar', 'tawaqqa', 'farahmi', 'mukammal', 'tor']
878	MA305FA1KY528NAFAMZ	Muhammad zubair	3708	2018-10-26	4	0	bht achi hyn thnx daraz	Positive	[]
879	MA305FA1KY528NAFAMZ	Abdullah	231	2019-03-15	4	0	mein tawaqqa nahi kar raha tha ke un shirts ko yeh achh st lagaye jayen ge sach mein shirts ka miyaar bohat aaccha hai woh bohat aram da aur pursukoon aur halkay hain waqai mein sun hwa mehsoos karte hain mein tamam rangon se mutmaen hon agarchay safaid rang ka hai aik moti safaid se ziyada safaid	Negative	['tawaqqa', 'shirts', 'shirts', 'miyaar', 'aram', 'pursukoon', 'mehsoos', 'tamam', 'safaid', 'rang', 'moti', 'safaid', 'safaid']
880	MA305FA1KY528NAFAMZ	Yousuf A. Khan	6000	2017-10-26	3	0	yeh qmizin sirf achh are hain itni saari nahi mein mujhe paish kiye jaany walay tane banay ke miyaar se mayoos tha kyun ke mein kisi se ziyada ghany ki tawaqqa kar raha tha aur yeh mehez kaghaz ki patli hai mujhe rang pasand hai lekin mujhe aisi shirts chahiye theen jo nazar ayen gi mujh par ahcha hai ziyada shirts ke neechay nahi kyunkay mein un ko sirf androoni ke tor par hi istemaal karsaktha …	Negative	['qmizin', 'tane', 'miyaar', 'mayoos', 'ghany', 'tawaqqa', 'kaghaz', 'patli', 'rang', 'pasand', 'shirts', 'shirts', 'neechay', 'androoni', 'tor']
881	MA305FA1KY528NAFAMZ	Salman Zafar	4814	2019-03-15	4	0	shirts ka miyaar heran kin hai aur mein iss ka madah ban gaya hon aisa naram mawaad jo khenchnay aur sahih foot nahi hota hai rang ke miyaar ka faisla sirf dhoney ke baad hoga	Negative	['shirts', 'miyaar', 'heran', 'ban', 'naram', 'khenchnay', 'rang', 'miyaar', 'dhoney']
882	MA305FA1KY528NAFAMZ	Rafay Mazhar	4308	2020-01-13	4	0	yeh shirts ka packet waqai uch i hai mujhe tawaqqa nahi thi ke woh un ke yeh achay foot honay ki umeed kar rahay hain lekin mujhe lagta hai ke aap logon ne mera size isharay par laga liya mujhe waqai tane banay pasand hain waqai naram aur kabhi kabhi mein un ko androoni tor par p_hnta hon tu mein apni doosri qmizin barbaad nahi karta hon	Negative	['shirts', 'packet', 'tawaqqa', 'umeed', 'logon', 'size', 'isharay', 'tane', 'pasand', 'naram', 'androoni', 'tor', 'phnta', 'doosri', 'qmizin', 'barbaad']
883	MA305FA1KY528NAFAMZ	arham	6348	2016-06-06	5	0	bohat achay miyaar ki tea shirts iss ka foot aram da aur pursukoon size aur tane banay acha hai	Positive	['miyaar', 'tea', 'shirts', 'aram', 'pursukoon', 'size', 'tane']
884	MA305FA1KY528NAFAMZ	haris markatia	6604	2019-11-10	4	0	bohat achay miyaar ki tea shirts iss ka foot aram da aur pursukoon size aur tane banay acha ha	Negative	['miyaar', 'tea', 'shirts', 'aram', 'pursukoon', 'size', 'tane']
885	MA305FA1KY528NAFAMZ	Tariq	5562	2017-06-17	4	0	wah oh wah mein tawaqqa nahi kar raha tha ke qeemat ke paish e nazar yeh qmizin iss ke achh be hon gi ab mein yeh keh sakta hon ke mein nay yeh qmizin saudey mein utaar di hain kyunkay yeh shirt bohat hi umdah tankay hue hain aur un ke rang waqai tar u tazah hain jab se mein hon un ko mil gaya mein nay apne aap ko taqreeban them har roz un mein se aik pehnay hue paaya woh mere liye sab se munasib…	Positive	['tawaqqa', 'qeemat', 'qmizin', 'qmizin', 'umdah', 'tankay', 'rang', 'tazah', 'taqreeban', 'roz', 'pehnay', 'paaya', 'munasib', '']
886	AY536FA08JT86NAFAMZ	Humayun	2197	2020-01-05	2	0	numeral bayan ke mutabiq nahi thi balai safaid rang ka tha jo bohat taizi se ganda ho jata hai aur surmai se neechay bohat halka hota hai	Positive	['safaid', 'rang', 'taizi', 'surmai', 'neechay', 'halka']
887	AY536FA08JT86NAFAMZ	Shan	5116	2017-05-22	5	0	mujhe yeh bohat pasand hai behtareen miyaar ke liye bohat bohat shukriya	Positive	['pasand', 'behtareen', 'miyaar']
888	AY536FA08JT86NAFAMZ	hasnain	6615	2019-06-11	2	0	ya upper us color ka nai h jo pic may tha	Neutral	['upper', 'color', 'pic']
889	AY536FA08JT86NAFAMZ	Amir	735	2019-01-07	5	0	dekhn ie may acha hai stuff b acha h kaafi	Positive	['stuff']
890	AY536FA08JT86NAFAMZ	Muhammad Hussain Awan	3568	2018-08-24	4	0	bhot acha hai keemat b sai h	Positive	['keemat']
891	AY536FA08JT86NAFAMZ	QSH	4208	2019-11-19	4	0	bilkul wohi nahi jo tasweer mein dekhaya gaya hai lekin kaafi acha hai rang gehra surmai nahi tha lekin siyah	Positive	['tasweer', 'rang', 'surmai', 'siyah', '']
892	AY536FA08JT86NAFAMZ	talha	7321	2019-01-09	5	0	bhot achi hoodie h iss keemat may	Positive	['hoodie', 'keemat']
893	MO114FA0Z08N4NAFAMZ	Usman Khan	5767	2017-07-08	1	0	tasweer dikhayi gayi aur jis package ne mujhe masool kya woh bilkul hi badsurat tha aur yeh qabil libaas nahi hai	Positive	['tasweer', 'dikhayi', 'package', 'masool', 'badsurat', 'qabil', 'libaas', '']
894	MO114FA0Z08N4NAFAMZ	Saad Parhar	4635	2018-02-25	1	0	zahir shuda jacket ke bajaye mutabadil jacket mujhe pouncha di gayi	Neutral	['zahir', 'jacket', 'mutabadil', 'jacket']
895	MO114FA0Z08N4NAFAMZ	Ab	152	2016-05-30	4	0	leather orignal nai h lakin ya acha h busy kny k lya	Neutral	['leather', 'orignal']
896	MO114FA0Z08N4NAFAMZ	Arsl Syed	949	2016-09-04	5	0	aisi qabil aetmaad aur qabil qader masnoaat paish karne ke liye daraz ka shukriya	Positive	['qabil', 'aetmaad', 'qabil', 'qader', 'masnoaat']
897	MO114FA0Z08N4NAFAMZ	Johany	2503	2018-04-04	5	0	yeh daraz par aik acha tajurbah hai naram mawaad khalis chamray ki jacket zip ka miyaar awsome sleeves thora sa taweel hai lekin majmoi tor par har cheez kaamil hai aur dosaron ko intahi sifarish ki jati hai mein usay star ki daraja bandi karoon ga	Negative	['tajurbah', 'naram', 'khalis', 'chamray', 'jacket', 'zip', 'miyaar', 'awsome', 'sleeves', 'taweel', 'majmoi', 'tor', 'dosaron', 'sifarish', 'daraja', 'bandi']
898	MA305FA16BB38NAFAMZ	Kazim	2613	2017-12-22	3	0	mein waqai kapray aur khatam karna pasand karta hon lekin zip ke miyaar se mutmaen nahi hon	Negative	['kapray', 'khatam', 'pasand', 'zip', 'miyaar', '']
899	MA305FA16BB38NAFAMZ	Moiz	3259	2018-02-14	3	0	theek hai kaali bilkul durust hai kyunkay yeh waqai mein bohat achi fitting ke sath aram da hai lekin bhuri rang ki ooni aib daar hai aur iss ka size bohat chhota hai	Positive	['durust', 'fitting', 'aram', 'bhuri', 'rang', 'aib', 'size', 'chhota', '']
900	MA305FA16BB38NAFAMZ	Suleman	5336	2017-03-21	4	0	pack mein dono jackets bohat achi theen mein un ko utaarna nahi chahta istemaal shuda mawaad intahi naram intahi garam aur bil akhir aram da aur pursukoon hai siyah aur dono jackets mein kaam karte hain bilkul kisi libaas ya ansoo ke baghair size bilkul mozoon hai aur isi terhan fitting bhi hai khaas tor par gardan kandhoon aur bazoun ke ird gird yakeeni tor par un jackets ko sifarish karne ka ir…	Positive	['pack', 'jackets', 'chahta', 'naram', 'garam', 'aram', 'pursukoon', 'siyah', 'jackets', 'libaas', 'baghair', 'size', 'mozoon', 'fitting', 'khaas', 'tor', 'bazoun', 'gird', 'tor', 'jackets', 'sifarish', '']
901	AY536FA1JBKTANAFAMZ	Moudood	3286	2018-04-02	1	0	wsa nai h jsa pic may dekhya hai	Neutral	['pic']
902	AY536FA1JBKTANAFAMZ	Rizwan Shah	4500	2019-09-27	5	0	mein ne design mein iss terhan ke miyaar ki thori si tabdeeli ki tawaqqa nahi ki hai lekin har baar daraz masnoaat ne mujhe mutmaen kardiya	Negative	['design', 'miyaar', 'thori', 'tabdeeli', 'tawaqqa', 'masnoaat', 'kardiya']
903	AY536FA1JBKTANAFAMZ	ALI	79	2016-03-08	5	0	achi hoodie h mujhy psnd hai	Positive	['hoodie', 'psnd']
904	AY536FA1JBKTANAFAMZ	Wajahat	5845	2016-05-14	4	0	acha stuff hai sardiyo k lya acha h ya	Positive	['stuff']
905	AY536FA1JBKTANAFAMZ	Hamza	2020	2018-03-12	5	1	mein ne design mein iss terhan ke miyaar ki thori si tabdeeli ki tawaqqa nahi ki hai lekin har baar daraz masnoaat ne mujhe mutmaen kardiya	Negative	['design', 'miyaar', 'thori', 'tabdeeli', 'tawaqqa', 'masnoaat', 'kardiya']
906	AY536FA1JBKTANAFAMZ	ShOaib	4975	2019-11-07	4	0	bura nai h lakin design change hai	Negative	['design', 'change']
907	AY536FA183EKENAFAMZ	jee	6731	2019-07-14	1	0	mawaad khofnaak hai aur rang siyah bhi nahi hai	Neutral	['khofnaak', 'rang', 'siyah']
908	AY536FA183EKENAFAMZ	Ali	589	2019-08-05	4	0	acha hai aur wakt p b mil gya hai	Positive	['wakt']
909	AY536FA183EKENAFAMZ	Burhanuddin	1320	2017-10-04	5	0	achi aur mojizana tor par wohi shai mila jis ka mein nai hukum diya tha	Negative	['tor']
910	AY536FA1JMH38NAFAMZ	Safwan	4715	2019-11-29	3	0	miyaar bilkul bhi acha nahi tha taham qeemat ke mutabiq theek hai	Positive	['miyaar', 'qeemat']
911	AY536FA1JMH38NAFAMZ	ahmed	6275	2017-04-06	1	0	khurdara miyaar yahan tak ke yeh samnay ki taraf se kharab hota hai jahan button mil jata hai aur koi wapsi kaghaz nahi mila ya mein iss ko wapas nahi kar sakta hon raqam ki zaroorat hai	Negative	['khurdara', 'miyaar', 'samnay', 'taraf', 'button', 'wapsi', 'kaghaz', 'wapas', 'raqam', 'zaroorat']
912	AY536FA1JMH38NAFAMZ	Nabil Hashmani	3875	2017-10-11	4	0	zaati tor par mujhe yeh pasand hai yeh itna garam nahi hai aur nah hi yeh sardi ke l hit halka halka hai jacket bhi achi lagti hai jaisay kisi cheez par mein ramp par chalta hon waqai sajeela aur aram da bhi hai	Positive	['tor', 'pasand', 'garam', 'halka', 'halka', 'jacket', 'ramp', 'chalta', 'sajeela', 'aram']
913	AY536FA1JMH38NAFAMZ	Pir Bilal	4187	2019-03-14	2	0	yeh waqai jhaari daar lagta hai iss liye ke rang bohat halka hai aur tane banay ko ghata sun hwa mehsoos hota hai khush nahi	Positive	['jhaari', 'rang', 'halka', 'tane', 'ghata', 'mehsoos', 'khush']
914	SU455FA18NJ18NAFAMZ	Mian Asad	3128	2016-04-20	5	1	yeh sirf aik umdah kharidari hai kyunkay qeemat ke liye iss sajeela kara gharri ke sath sulooq karna waqai herat angaiz tha kyunkay iss ka ail dd display iss terhan kaam karta hai aur siyah paas manzar ke sath herat angaiz lagta hai yeh bhi halka phulka aur pahannay mein kaafi aram da tha	Positive	['umdah', 'kharidari', 'qeemat', 'sajeela', 'herat', 'angaiz', 'display', 'siyah', 'manzar', 'herat', 'angaiz', 'halka', 'phulka', 'pahannay', 'aram']
915	SU455FA18NJ18NAFAMZ	HASAN	1922	2018-02-23	5	1	bhot achi chez hai sirf rup may	Positive	[]
916	SU455FA18NJ18NAFAMZ	Jawad Gill	2467	2017-10-01	5	1	theek hai mein iss qayadat wali ghari se kaafi mutmaen hon qeemat waqai susti hai aur aik mah guzarnay ke bawajood bhi ghari ka miyaar itna aaccha nahi hai balkay iss qeemat ke liye jo mujhe aaccha lagta hai ghari par mojood hindsay kaafi numaya aur numaya bhi hain lehaza mein khush hon	Positive	['qeemat', 'susti', 'miyaar', 'qeemat', 'mojood', 'hindsay', 'numaya', 'numaya', 'khush']
917	SU455FA18NJ18NAFAMZ	Umer Tahir	5716	2018-06-21	5	1	mein ne un mein se ziyada tar thook mein kharedne ka maienay liya hai kyunkay qeemat ke lehaz se un ka miyaar waqai achcha hai majmoi tor par kara ki tarkeeb waqai bohat achi hai iss ka mazboot paidaar aur iss par kara lock hai jis ki wajah se yeh bantaa hai achh looking nazar anay ke sath sath kalayi ke charon taraf mehfooz honay mein bhi nazar aata hai gharri par ail dd light waqai roshan hai j…	Positive	['qeemat', 'lehaz', 'miyaar', 'majmoi', 'tor', 'paidaar', 'lock', 'wajah', 'kalayi', 'taraf', 'mehfooz', 'light', 'roshan', 'wajah', 'din', 'bhar', 'roshni', 'aasani', 'waqt', 'quality', 'susti', 'mehsoos', 'khail', 'khail']
918	SU455FA18NJ18NAFAMZ	hassan	6621	2019-12-19	1	0	may intezar kar rhi ho pny order ka	Negative	['intezar', 'order']
919	MA305FA1KY528NAFAMZ	Ahsan Malik	499	2019-10-29	4	0	yeh tea herat angaiz hain aur mein nay website par dekhty hue tamam rang bar waqat mujhe pouncha diye thay un shirts ke baray mein sab se achi baat yeh hai ke un sab ki yaksaa mozoon aur naram naram aram da tane banay hain jo iss mein nahi hain stret t mukammal aur mukammal tor par ihata karta hai daraz pk par bohat saaray pack mojood thay lekin mujhe yeh waqai muashi tor par mila hai	Positive	['tea', 'herat', 'angaiz', 'website', 'dekhty', 'tamam', 'rang', 'waqat', 'shirts', 'baray', 'mozoon', 'naram', 'naram', 'aram', 'tane', 'mukammal', 'mukammal', 'tor', 'pack', 'mojood', 'muashi', 'tor']
920	MA305FA1KY528NAFAMZ	Uzair Khan	5786	2018-11-24	3	0	qamizoon ka acha pack waqai fori tarseel ke isharay ki tareef karta hon lekin mein iss ka miyaar behtar hona chahoon ga fi aal haal yeh mere khayal ke mutabiq nahi hai lekin yeh sahih size ka hai lekin rangeen miyaar bohat kharab hai	Negative	['qamizoon', 'pack', 'isharay', 'tareef', 'miyaar', 'khayal', 'size', 'rangeen', 'miyaar']
921	MA305FA1KY528NAFAMZ	Raza	4431	2017-12-12	4	1	iss mein shirt achay miyaar ke hain iss mein koi shak nahi lekin sirf aik safaid kameez mein mamooli kaat nishaan ghaliban qanchi kaat tha	Negative	['miyaar', 'safaid', 'kameez', 'mamooli', 'kaat', 'nishaan', 'kaat']
922	MA305FA1KY528NAFAMZ	HamXa KhAn	1996	2017-10-17	5	1	shirts ka miyaar waqai uch is hai jis ka size aur fitting bilkul theek aur theek hai lekin peelay rang ki bajaye mujhe aik peelay rang ki kameez mil gayi yeh sirf wohi cheez thi jo aam cheez se bahar thi warna mein iss kharidari se mutmaen hon	Negative	['shirts', 'miyaar', 'size', 'fitting', 'peelay', 'rang', 'peelay', 'rang', 'kameez', 'kharidari', '']
923	MA305FA1KY528NAFAMZ	Reeses	4444	2018-10-08	2	0	aap logon ke zareya shirts ki iss terhan ki naaqis kefiyat jo mujhe mili hai jab se mein nai usay nahi pehna hai mein iss se mutmaen nahi hon ke aap log jo paish kar rahay hain woh aaccha nahi hai	Negative	['logon', 'shirts', 'naaqis', 'log']
924	MA305FA1KY528NAFAMZ	Shahid Achukzai	5031	2017-11-02	3	1	mein nai yeh packet apni mein bohat baar dekha hai lehaza mein nai agay barh kar garmiyon ke liye order diya lekin miyaar itna achchca nahi hai jitna mein nai iss ki tawaqqa ki thi yeh iss se behtar hota agar mawaad iss patli nah hota yeh halka pan achchca hai lekin istehkaam ka ansar kho deta hai	Negative	['packet', 'dekha', 'garmiyon', 'order', 'miyaar', 'tawaqqa', 'patli', 'halka']
925	MA305FA1KY528NAFAMZ	Ammad Ali	759	2017-12-18	5	0	meri pehli online shopping mujhe herat zada herat angaiz kapron se hui jis ki mujhe umeed nahi thi peelay rang ke ilawa bhi rang bohat achay thay lekin iss ki wajah yeh hai ke mujhe peelay rang ki tea shirts pasand nahi hain lekin sirf mein qabil zikar quality tea shirts ka hona herat angaiz se ziyada hai	Neutral	['online', 'shopping', 'herat', 'herat', 'angaiz', 'kapron', 'umeed', 'peelay', 'rang', 'rang', 'wajah', 'peelay', 'rang', 'tea', 'shirts', 'pasand', 'qabil', 'quality', 'tea', 'shirts', 'herat', 'angaiz']
926	MA305FA1KY528NAFAMZ	Abubakar chohan	304	2017-11-12	2	0	woh mujhe du kaali shirts bhaijtay hain neela gayab hai dosray aam hain	Neutral	['shirts', 'bhaijtay', 'neela', 'gayab', 'dosray']
927	AY536FA1LOJRINAFAMZ	Shafi Muhammad	4996	2016-11-21	1	0	mein ny jo jacket order kya tha woh samnay ki jaybou se tha jo mujhe mila hai woh meri samajh se balatar hai kaam kaam iss mein feesad bhi nahi hai jis se mujhe poori dhoka dahi hui hai log aur daraz bekar hain	Negative	['jacket', 'order', 'samnay', 'dhoka', 'log', 'bekar']
928	AY536FA1LOJRINAFAMZ	rida	7084	2017-09-02	5	1	agar aap dastyab hon tu mein aap ko das sitara faraham karoon ga shukriya	Positive	['dastyab', 'sitara', 'faraham', '']
929	AY536FA1LOJRINAFAMZ	ishaan kumar	6696	2019-11-28	5	1	miksikn ki shandaar patli jacket mein tasweer ke mutabiq yeh wusool karoon ga shukriya	Positive	['shandaar', 'patli', 'jacket', 'tasweer', 'wusool', '']
930	AY536FA1LOJRINAFAMZ	nadia	6964	2016-05-12	5	1	shukriya ke mein yaqeen nahi karsaktha mujhe yeh online store se aap ki team nay qubool kya	Neutral	['yaqeen', 'online', 'store', 'team']
931	AY536FA08JT86NAFAMZ	Qasim	4232	2017-07-31	4	0	ya hoodies achi hai	Positive	['hoodies']
932	AY536FA08JT86NAFAMZ	saddam	7110	2019-03-20	5	0	bhot kush ho khareed k bybeez sy	Neutral	[]
933	AY536FA08JT86NAFAMZ	Fawad	1772	2017-06-06	5	1	mein ne usay din mein haasil kya aur miyaar meri tawaqqa se bohat acha hai	Positive	['din', 'haasil', 'miyaar', 'tawaqqa']
934	AY536FA08JT86NAFAMZ	Kazim Younis	2614	2018-11-10	5	0	pehli baar mein ne daraz se khareeda tha aur mein khidmat se mutmaen hon bohat umdah hai mein tawaqqa nahi kar raha tha ke yeh itna acha aur aram da hog	Positive	['khidmat', 'umdah', 'tawaqqa', 'aram']
935	AY536FA08JT86NAFAMZ	Adil	333	2018-12-05	5	0	miyaar bohat achi premium lag rahi hai aisi achi bhejnay ka shukriya	Positive	['miyaar', 'premium']
936	MO114FA0Z08N4NAFAMZ	Muhammad Irfan	3574	2017-07-20	1	0	chamra nahi tafseel app par sara sar ghalat hai	Positive	['tafseel', 'ghalat']
937	MO114FA0Z08N4NAFAMZ	Sairaellahi	4750	2018-01-21	4	0	yeh acha hai lekin yeh itna brown nahi hai jitna tasweer dekhata hai	Neutral	['brown', 'tasweer', 'dekhata']
938	MO114FA0Z08N4NAFAMZ	Chakar Faiz	1350	2018-09-15	2	0	jab numeral aati hai to iss mein design aur rang ke kuch farq hotay hain jaisa ke tasweer mein dekhaya gaya hai taham mein usay istemaal kar raha hon aur usay daraz par wapas nahi karoon ga	Positive	['design', 'rang', 'tasweer', 'wapas']
939	MO114FA0Z08N4NAFAMZ	Abbasi	160	2018-12-28	4	0	umdah thori der se masool sun hwa lekin miyaar acha hai	Negative	['umdah', 'thori', 'masool', 'miyaar']
940	MO114FA0Z08N4NAFAMZ	Ali	589	2016-09-28	1	0	bohat kharab miyaar chamray ki terhan nazar atay hain lekin asal mein dobarah mil jatay hain bilkul bhi garam nahi	Negative	['miyaar', 'chamray', 'asal', 'dobarah', 'garam']
941	MO114FA0Z08N4NAFAMZ	Ahsan	486	2017-02-08	5	0	yeh daraz par aik acha tajurbah hai naram mawaad khalis chamray ki jacket zip ka miyaar awsome sleeves thora sa taweel hai lekin majmoi tor par har cheez kaamil hai aur dosaron ko intahi sifarish ki jati hai mein usay star ki daraja bandi karoon ga	Negative	['tajurbah', 'naram', 'khalis', 'chamray', 'jacket', 'zip', 'miyaar', 'awsome', 'sleeves', 'taweel', 'majmoi', 'tor', 'dosaron', 'sifarish', 'daraja', 'bandi']
942	MO114FA0Z08N4NAFAMZ	Ali	589	2019-05-23	1	0	iss ka miyaar bohat kharab hai tasweer mein dukhaay jane wala rang mukhtalif tha	Positive	['miyaar', 'tasweer', 'dukhaay', 'rang', 'mukhtalif']
943	DA291FA04ERY6NAFAMZ	Ayaz Ali	1134	2016-02-02	5	0	mujhe waqai iss ka rang aur miyaar pasand hai	Positive	['rang', 'miyaar', 'pasand']
944	AY536FA1JMH38NAFAMZ	usman shah	7380	2016-09-26	4	1	numeral achi hai fabric aur style bhi hai	Positive	['fabric', 'style', '']
945	AY536FA1JMH38NAFAMZ	Daniyal Ahmed	1409	2019-04-28	2	1	yeh jacket khofnaak hai itni kaam miyaar ki jis ki mujhe tawaqqa nahi thi jacket bohat hi naaqis maadi samajh daar aur aqalmand dikhayi deti hai iss terhan nahi ke site par usay kis terhan dekhaya gaya tha	Negative	['jacket', 'khofnaak', 'miyaar', 'tawaqqa', 'jacket', 'naaqis', 'dikhayi', 'site']
946	AY536FA1JMH38NAFAMZ	waqas ahmed	7411	2017-12-28	3	1	yeh nah tu bohat ahcha hai aur nah hi bura mein kisi hadd taq ost kahoon ga miyaar itna bara nahi hai lekin sath hi iss ki qeemat bhi kaafi munasib hai aur iss ke bawajood tane banay ko garam mehsoos hota hai	Negative	['miyaar', 'bara', 'qeemat', 'munasib', 'tane', 'garam', 'mehsoos']
947	AY536FA1JMH38NAFAMZ	kamran	6750	2019-09-08	5	1	iss ne meri tawaquaat ko poori terhan se pura kya yeh garma garam aur miyaar mein acha hai	Positive	['tawaquaat', 'garma', 'garam', 'miyaar']
948	AY536FA1JMH38NAFAMZ	Gul Khan	1897	2019-02-02	2	1	yeh jacket kahin bhi meri tawaquaat ke qareeb nahi thi mein neh socha tha ke kisi garam mawaad ki talaash mein yeh uch be hoga lekin design se le kar maday ka miyaar bohat kharab hai surmai rang aaccha lagta hai lekin mere paas jacket behtar hai	Negative	['jacket', 'kahin', 'tawaquaat', 'qareeb', 'neh', 'garam', 'talaash', 'design', 'maday', 'miyaar', 'surmai', 'rang', 'jacket']
949	AY536FA1JMH38NAFAMZ	Muhammad Awais	3533	2018-02-19	2	1	miyaar se khush nahi yeh waqai arzaan lagta hai kyun ke tane banay thora sa neechay pehna sun hwa mehsoos hota hai agarchay mein iss ke istemaal shuda cheezon ya kisi bhi cheez par yaqeen nahi rakhta hon kyunkay yeh munasib tor par bhari thi lekin khud usay pahannay aur dhuain jaany ki wajah se hi kyun hai apni basri appeal kho gayi hai	Negative	['miyaar', 'khush', 'tane', 'neechay', 'mehsoos', 'cheezon', 'yaqeen', 'munasib', 'tor', 'bhari', 'pahannay', 'wajah', 'appeal']
950	AY536FA183EKENAFAMZ	Sid	5242	2017-12-11	2	0	darmiyanay darjay ke size ka order den miyaar ko qabil bardasht tha usay mehsoos kya gaya tha ke agar usay utaarnay par thori sakhti khenchi jaye tu phatt jaye gi daku zip achha tha yeh qareeb se dekhnay mein araha tha aur baad tareen seenah se yeh darmiyanay size ke liye bhi sakht tha dosaron ke khilaaf jo iss ke paas hai	Negative	['darmiyanay', 'size', 'order', 'miyaar', 'qabil', 'bardasht', 'mehsoos', 'thori', 'sakhti', 'phatt', 'zip', 'qareeb', 'seenah', 'darmiyanay', 'size', 'sakht', 'dosaron', 'khilaaf']
951	AY536FA183EKENAFAMZ	azeeza	6397	2018-07-15	4	0	mujhy psnd h stuff ach h iss ka	Negative	['psnd', 'stuff']
952	AY536FA183EKENAFAMZ	Waqar	5876	2017-06-29	5	0	ya cahi chez h iss keemat p	Neutral	['keemat']
953	AY536FA183EKENAFAMZ	Shan	5116	2016-05-20	4	0	quality bhot achi nai lakin keemt k lihaz sy thek h	Positive	['quality', 'keemt', 'thek']
954	AY536FA1LOJRINAFAMZ	farzeen sumair	6537	2017-07-12	5	0	noon jacket bohat tang hai lekin herat angaiz nazar aa rahi hai	Negative	['jacket', 'tang', 'herat', 'angaiz']
955	MA305FA1KY528NAFAMZ	Usama	5741	2018-03-22	2	0	inho ny mujhy white kameez day hai yellow nai	Negative	['white', 'kameez', 'day', 'yellow']
956	MA305FA1KY528NAFAMZ	irtaza ahmad	6693	2019-07-20	1	0	unhon ne mujhe du tea shirts ke aik hi rang beje aur safaid aur neelay rang ka rang gayab hai	Positive	['tea', 'shirts', 'rang', 'safaid', 'neelay', 'rang', 'rang', 'gayab']
957	MI543EL1HRDD4NAFAMZ	Rehman	4458	2016-12-04	5	0	super se bi uper stars yaar buy kar lo sab	Positive	['super', 'buy']
958	MO574EL1F52OINAFAMZ	Ali	589	2017-08-17	1	0	na proper charge karti hai na data transfer hota hai	Neutral	['charge', 'data', 'transfer']
959	LG764EL0UGTEGNAFAMZ	AAqib	46	2019-12-12	5	0	best products un daraz real porducts jo log bolty hain ki daraz galat cheez send karta hi tu wo log bohat bari jhooty hain	Positive	['best', 'products', 'real', 'porducts', 'log', 'galat', 'log', 'bari']
960	LG764EL0UGTEGNAFAMZ	mrs. Zareena	6911	2017-08-13	4	0	bachon k lye acha hai screen size bara hai pura din cartoons dekhte hain battery bhi pura din aram se chalti hai	Positive	['screen', 'size', 'bara', 'din', 'cartoons', 'battery', 'din', 'aram', 'chalti']
961	LG764EL0UGTEGNAFAMZ	Muhammad	3482	2018-11-09	3	0	tab orignal ha korian ki bohat ci app ic mein mojood hain ur android version bohat purana ha jis ki waja sa bohat ci application nhi chal rahi hain baki baterry timing bohat achi ha ur display bhi acha ha	Positive	['orignal', 'mojood', 'android', 'version', 'purana', 'application', 'baterry', 'timing', 'display']
962	UM501EL17AW6ONAFAMZ	Assad Khan	1064	2017-04-29	3	0	sahi hai bs itna acha nahi hai jitna maine socha tha isko fold karna bohat mushkil hai flexible hai lekin bohat hi hard hai yeh aram se nahi murta aur mjhse iske clips b toot gye thay phone laga raha tha tw aur ispe phone lagao tw phone off hojata hai qk power button press hota hai	Negative	['maine', 'fold', 'mushkil', 'flexible', 'hard', 'aram', 'clips', 'toot', 'power', 'button', 'press']
963	AL968EL0VN6S2NAFAMZ	Murtaza	3775	2017-10-17	1	0	bakwas ghatiya rd class kisi kaam ka nahi hay	Negative	['bakwas', 'class']
964	SO638EL103OUWNAFAMZ	Dr M Sarang	1461	2016-04-21	1	0	jo add may dikha rahay hain us c bilkul chang hay ur rupees charges b liay halak karachi may delivery free likha hua hay kindly dont buy these	Neutral	['charges', 'free', 'likha', 'buy']
965	MI543EL02ACXSNAFAMZ	Paracha	4170	2019-09-26	5	0	bohat zabardast	Positive	['zabardast']
966	GJ930EL0BMNI6NAFAMZ	Arslan	950	2019-05-09	4	0	achha hay bs length kaam hay iski	Positive	['length']
967	TD807EL1AHT5INAFAMZ	Rahatullah	4321	2018-09-19	5	0	case bhot alwa quality ka h aur earphones bhi bhot acha h	Positive	['case', 'quality', 'earphones']
968	TD807EL1AHT5INAFAMZ	Tehmoor Abbas	5603	2017-06-11	5	0	tdk ki apni hi awwaz h love it	Positive	[]
969	MI543EL02ACXSNAFAMZ	Masna	3057	2018-11-09	4	0	mah ka powerbank hai tou kaafi mere liay lekin waisay mere phone ko bas aik baar hi charge karta hai price ke hisaab se sahi hqai lekin mujhe khud mah wala mangwana chayiey tha abhi tou yeh sahi kaam karraha hai lekin agar sirf phone laga dia tou baki equipment ko charge karna mushkil hojata hai	Negative	['powerbank', 'charge', 'hisaab', 'equipment', 'charge', 'mushkil']
970	MI543EL02ACXSNAFAMZ	Muhammad	3482	2016-05-01	4	0	eay ordered one mi mah power bank for mi sister sun enough eay was again aat daraz pk tu order two more thay reason iss that thay power bank iss soo much satisfying mi advertised aa conversion rate of which iss actually correct thay product iss just great with just one flaw which iss its sharp corners thay sharp corners scratched mi new phone	Positive	['ordered', 'mi', 'power', 'bank', 'mi', 'order', 'power', 'bank', 'mi', 'advertised', 'conversion', 'rate', 'sharp', 'corners', 'sharp', 'corners', 'scratched', 'mi', 'new']
971	MI543EL02ACXSNAFAMZ	Musab Bin Umair	3783	2017-03-23	5	0	best product very cheap and very easy tu usay	Positive	['best', 'cheap', 'easy']
972	MI543EL02ACXSNAFAMZ	good	6564	2019-12-13	5	0	just add more and bought mah battery	Neutral	['battery']
973	MI543EL02ACXSNAFAMZ	Moosa Ali	3281	2016-09-24	5	0	xiaomi iss coming up with soch fancy devices and everything seems tu bay affordable and aat thay same time have high end quality this power bank iss nu different very premium build fast charging and aa decent charging capacity all in all it iss simply perfect	Neutral	['soch', 'fancy', 'devices', 'everything', 'affordable', 'time', 'high', 'quality', 'power', 'bank', 'premium', 'build', 'fast', 'charging', 'decent', 'charging', 'capacity', 'simply', 'perfect']
974	MI543EL02ACXSNAFAMZ	hammad	6590	2019-06-29	4	0	bara solid performance wala power bank hai yeh mi wala charge bhi jaldi hojata hai aur phone ko bhi tezi se charge karta hai mien tou bara khush tha isko iustemal karke thora sa bhaari hai size ke hawale se lekin jaib mein lekar ghoom saktay hain aram se	Negative	['bara', 'solid', 'performance', 'power', 'bank', 'mi', 'charge', 'jaldi', 'charge', 'bara', 'khush', 'bhaari', 'size', 'hawale', 'jaib', 'ghoom', 'aram', '']
975	TD807EL1AHT5INAFAMZ	Iqbal	2328	2017-10-19	5	0	bohat achi hai yar thanks	Positive	[]
976	TD807EL1AHT5INAFAMZ	Hamza Ali	2021	2018-03-22	5	0	sahi bas h aur maza ki sound h	Positive	['maza', 'sound']
977	TD807EL1AHT5INAFAMZ	Zafar	6030	2016-07-25	5	1	case bhot acha h aur awaz bhi bhot achi h	Positive	['case', 'awaz']
978	TD807EL1AHT5INAFAMZ	Muhammad Yousaf	3670	2018-06-19	5	1	awaz bhot achi h aur bas bhi acha h highly recommended	Positive	['awaz', 'highly', 'recommended']
979	HU610EL104XE8NAFAMZ	Farhan	1704	2017-01-14	5	0	mein ne buy keeiya hai honor c pro boht fast mobile and betry timing bhi boht zaida hai	Positive	['buy', 'pro', 'fast', 'betry', 'timing', 'zaida']
980	HU610EL104XE8NAFAMZ	Arsalan	929	2018-01-13	1	0	dosto ab tk kisi ne online ya sell phone mangwaya price bhi btao kitne ka mangwaya aur kaisa chal raha ha plz	Neutral	['online', 'sell']
981	TE111EL1KXNGWNAFAMZ	Waqar Hussain	5881	2016-07-28	5	0	bara hi acha pack hai yaar yeh tw paison k lehaz se itni price may tw bs koi aik cheez hi aati hai lekin daraz se yeh dono mil rahi hai aur dono ki quality b mutasir kun hai glass protector bohat hi patla aurt clear hai achay se screen ko protect karta hai aur back cover itna soft hai aram se lag jata hai aur hatana chahoon tw hatana b koi muhskil nahi hai isse maain bohat matmaeeen hogya hon yeh…	Negative	['bara', 'pack', 'paison', 'lehaz', 'quality', 'mutasir', 'glass', 'protector', 'patla', 'clear', 'screen', 'protect', 'back', 'cover', 'soft', 'aram', 'scratches', 'pocket', 'keys', 'screen', '']
982	TE111EL1KXNGWNAFAMZ	Ahmed Malik	462	2019-10-12	2	0	note ke liay yeh tou bilkul bhi acha nai hai back case ki cutting sahi nia ui wee aur quality bhi itni mazboot nai lagi mujhe glass protector se mein satisfied hon lekin back case se nai who itna khaas nai hai	Neutral	['note', 'back', 'case', 'cutting', 'quality', 'glass', 'protector', 'satisfied', 'back', 'case', 'khaas']
983	TD807EL1AHT5INAFAMZ	Faheem	1620	2017-08-10	5	0	yar best earphone h metal bhi real h aur weight bhi acha h audio may bas bhi acha h	Positive	['best', 'earphone', 'metal', 'real', 'weight', 'audio']
984	TD807EL1AHT5INAFAMZ	Rahatullah Khan	4322	2017-12-03	5	0	mughy iss ki sound bhot achi lagi h aur iss may kaafi acha bas bhi h vocals bhi clear h thanks	Positive	['sound', 'vocals', 'clear']
985	TD807EL1AHT5INAFAMZ	Ghulam Mujtaba	1876	2019-06-02	5	1	mughy tu iss ki audio bhot passad h bas bhi acha h aur case bhi achi quality ka h	Positive	['audio', 'case', 'quality']
986	IN545EL0GG4NGNAFAMZ	WAJID	5822	2017-05-04	5	0	har lihaz se acha phone h	Negative	[]
987	ON533EL0MR9HUNAFAMZ	musadiq	6944	2017-03-13	1	0	try telemart weha iss se susta price mein available hai yehe hi handset	Negative	['susta', 'handset']
988	TD807EL1AHT5INAFAMZ	Saqib Irshad	4896	2018-05-17	5	1	acha material h aur metal bhi acha h bas bhi acha h thanks	Positive	['material', 'metal']
989	TD807EL1AHT5INAFAMZ	Abdullah Shaikh	252	2016-08-26	5	1	audio clear h aur mughy ye bhot pasand h case bhi acha h	Positive	['audio', 'clear', 'pasand', 'case']
990	TD807EL1AHT5INAFAMZ	Irtiza Bilal	2365	2018-07-03	5	1	audio achi h aur pice bhi reasonable h	Positive	['audio', 'reasonable']
991	TD807EL1AHT5INAFAMZ	Ahmed Khan	461	2018-06-08	5	0	mughy iss price may iss se behtar deal nhi mili plus iss k sath caring case bhi h jo k aur koi offer nhi kar raha aur iss ki audio quality bhi bhot clear h metal bhi real usay kia hua h aur kaafi acha weight balance h in ka	Positive	['deal', 'plus', 'caring', 'case', 'offer', 'audio', 'quality', 'clear', 'metal', 'real', 'weight', 'balance', '']
992	SA609EL119OZKNAFAMZ	Jawad	2465	2018-12-29	5	0	fingerprint sensor na honi ki waja se koi nai ke raha	Negative	['fingerprint', 'sensor']
993	ME779EL0NGJIYNAFAMZ	Faiz	1647	2018-06-03	5	0	length bhi poori h aur strong bhi h cable thanx	Neutral	['length', 'strong', 'cable']
994	ME779EL0NGJIYNAFAMZ	Faisal	1634	2019-03-09	5	0	mughy ye cable achi lagi kayon price bhi achi h aur mazboot cable h	Positive	['cable', 'cable']
995	HU610EL06YOR4NAFAMZ	Arif	902	2019-11-19	5	0	bohat acha set hi	Positive	['set']
996	MI543EL03TQDYNAFAMZ	Abdul	164	2016-07-26	3	0	bhai iss ka front camera mp ha	Neutral	['bhai', 'front', 'camera']
997	MI543EL00RSIWNAFAMZ	Muhammad Ayub	3535	2019-05-04	2	0	kiya yeh jo shape ha yehi ha ya change ha please bataein	Neutral	['shape', 'change']
998	MI543EL00RSIWNAFAMZ	Ameer Hamza	721	2018-05-18	5	0	best mobile price bhi achi thi camera bhi acha hi front ur back dono mein portrait mood hi lock wise bhi piyara hi sab ko pasand aya	Positive	['best', 'camera', 'front', 'back', 'lock', 'pasand']
999	MI543EL00RSIWNAFAMZ	Ali	589	2018-10-12	5	0	aqal k andhon note pro pro lgy hue ho pakistan maa iss ka naam change hua hai just hai yh note pro e redmi note pak maa hai ur dollar dakho iss hisaab sa bilkul fit price hai processor dakho cams dakho all in un good device	Positive	['note', 'pro', 'pro', 'naam', 'change', 'note', 'pro', 'note', 'dollar', 'hisaab', 'fit', 'processor', 'cams', 'good', 'device']
1000	SI296FA004BZUNAFAMZ	Unknown	5730	2019-05-31	1	0	bakwas	Negative	['bakwas']
1001	CT604FA043AWGNAFAMZ	jamal	6716	2016-03-03	2	0	lena ka koi fida nahi ha pasa zaya ha asa lagta bnda na bnyan pani ksm sa	Negative	[]
1002	DA296FAHE1SJNAFAMZ	tehmina	7333	2018-01-17	5	0	achi suit hai price bhi fit hai	Positive	['suit', 'fit']
1003	EN348FA1CBWXQNAFAMZ	zohaib	7482	2016-09-24	5	0	ghuu	Neutral	[]
1004	SE956SP1E4VA0NAFAMZ	junaid	6741	2019-03-10	1	0	jo jpg web site may lagi hi wasa nai hi baad	Neutral	['jpg', 'web', 'site']
1005	VI363FA0IN2J8NAFAMZ	Tauheedullah Majid	5579	2019-01-24	4	0	kamzor ankhon ke liay yeh bari achi aijaad hai ankhon pe isko pehnn ke zorr kaam parhta hai lens ki quality bhi achi hai aur labay chalne ki umeed rakhta hon kiunkay achi quality per mustamil hain yeh	Positive	['kamzor', 'ankhon', 'bari', 'ankhon', 'parhta', 'lens', 'quality', 'chalne', 'umeed', 'quality']
1006	CU002FA0W4UF4NAFAMZ	Ch. Shahzad	1347	2016-05-25	4	0	eay got this watch yesterday boht boht boht zabardast watch ha daikhnay maa bhi boht piyari ha	Positive	['watch', 'zabardast', 'watch', 'daikhnay', 'piyari']
1007	CA825FAEMD3INAFAMZ	Ahmii	484	2018-12-13	4	0	although thay watch iss nice for its price and all bot eay expected its dial tu bay much bigger than it actually iss otherwise its great	Positive	['watch', 'nice', 'bot', 'expected', 'dial', 'bigger']
1008	SO382FA1CS7FCNAFAMZ	Sadiq Khan	4693	2019-07-04	5	0	bohat achi ghari hai iski tou price bhi bohata chee hai mere saray dostoun mein mujhse pooocha iske baray mein meine tou abhi iske uper se sticker bhi nai utara iske leather ki quality se mein khush hoon bohat mazboot ghari hai aur bhari bhi itni nai hai	Positive	['baray', 'sticker', 'leather', 'quality', 'khush', 'bhari', '']
1009	SO382FA1CS7FCNAFAMZ	Abdulrehman khan	260	2018-03-23	5	0	yeh ghari mashaallah bari achi lagi hai iska leather strap iske dial ka colour aur wazzan sab se mein mutmaeen hon iss se behtar ghari iss price mein nahin hai	Positive	['mashaallah', 'bari', 'leather', 'strap', 'dial', 'colour', '']
1010	KU877FA0DI54KNAFAMZ	Omama	4130	2017-12-23	2	0	bilkul acha nai hai socha tha magnetic locket hoga bot ye aik hi dafa toot gya nut good	Negative	['magnetic', 'locket', 'bot', 'toot', 'good']
1011	KU877FA0DI54KNAFAMZ	Obaid Manzoor	4123	2018-08-26	3	0	concept tou bara acha hai bas agar quality bhi waisi ho tou bohata cha hota mein itna satisfied nai hon kiunkay chian ki qualty tou hai hi low lekin pendants bhi itnay mazedar nai lagaya aur size mien bhi thoray chotay lagay pehnnay hue tou hain lekin quality achi na honay ki wajah se mein agay kisi ko day nai sakta	Negative	['concept', 'bara', 'quality', 'satisfied', 'qualty', 'low', 'pendants', 'mazedar', 'size', 'thoray', 'chotay', 'pehnnay', 'quality', 'wajah', 'day']
1012	BN244FA1BXKNWNAFAMZ	Husnain	2206	2016-06-02	1	0	very baad stuf many order kiya pic dakh k pyari lgy pic m lakin jb recieve ki ur khul k dakha andar landy ki sherts thi fzool h ya	Negative	['stuf', 'order', 'pic', 'pyari', 'pic', 'khul']
1013	DA523FA18BYZGNAFAMZ	Mohammad Shah	3226	2019-02-15	1	0	ek trouser ki quality sahi hai ek ki bakwas	Negative	['trouser', 'quality', 'bakwas']
1014	MA305FA1KY528NAFAMZ	Musaddiq	3784	2019-09-10	1	0	phli bar pahanay maa hay shirts salae sa phatna lag gai hain change mi review	Neutral	['shirts', 'salae', 'change', 'mi']
1015	AY536FA0EFBCSNAFAMZ	Ghufran	1867	2017-10-24	1	0	ye wo ny hay jo show kiya gaya hay sb change hay huuu	Negative	['show', 'change']
1016	DA523FA18BYZGNAFAMZ	Fariz Hameed	1737	2018-12-10	4	0	bohot outclass trousers hain mujhe toh iss tarah ke fitted trousers kabse chahiye thya laken yahan markets mein ya tou yeh bohot mehngay thay ya tou mil hi nahi rahay thay laken daraz pk par itnay zabardast price mein mere ghar pe deliver kardiye gaye yeh bohot zabardast hain inki fitting itni achi lagti hai pehn ke ke kia bataun bilkul jis tarah dikhaye gaye hainn ye wese hi hain bus ek baat hai…	Positive	['outclass', 'trousers', 'fitted', 'trousers', 'markets', 'mehngay', 'zabardast', 'deliver', 'zabardast', 'fitting', 'bus', 'kapra', 'aram', 'day', 'garmiyon', 'mushkil', 'mota', 'kapra']
1017	DA523FA18BYZGNAFAMZ	Muhammad Bilal Tahir	3543	2018-07-26	4	0	trousers tou mashaallah se bohat achay hain hjaisay dikhaye thay waisay hi deliver kiye hain bohat aramday hain aik baar pehnkay sukoon mein bethe rahao colours bhi mujhe pasand aye inke blue aur neon green wala grey walay se behtar laga	Positive	['trousers', 'mashaallah', 'deliver', 'aramday', 'sukoon', 'pasand', 'blue', 'green', 'grey', '']
1018	SH069FA039PJONAFAMZ	Ali	589	2017-12-12	1	0	sir iss quantity show nahi kar raha hay	Neutral	['quantity', 'show']
1019	AY536FA0EFBCSNAFAMZ	qamar	7038	2020-01-27	5	0	product nice hai rate bhio munasib hain	Positive	['nice', 'rate', 'munasib']
1020	AY536FA0EFBCSNAFAMZ	Muhammad Tahir	3646	2019-05-11	1	0	shirts achi hain bot na tu wo colours hain jo dekhi thy aur na hi wo shirts jo order ki then bot jo ai hain wo b thek hi hain bot wekhaya kch ti aya kch	Negative	['shirts', 'bot', 'shirts', 'order', 'bot', 'thek', 'bot']
1021	AY536FA0JL0UANAFAMZ	Naina	3919	2016-06-22	1	0	eay buy it dikhne may bilkul pic jesi hay bot fabric bht kharab ur stitching very baad first time may hi silai khul gai ur kapra bilkul dheela hogaya medium se large hogai very baad aybeez	Negative	['buy', 'dikhne', 'pic', 'bot', 'fabric', 'stitching', 'time', 'silai', 'khul', 'kapra', 'dheela', 'medium', 'large', 'aybeez']
1022	AY536FA11G0ZMNAFAMZ	liaqat	6802	2018-10-12	5	0	butiful mal hai ye	Neutral	['butiful']
1023	MA305FA0ATC9ANAFAMZ	Hamza Husnain	2026	2017-05-12	5	0	size bhe sahi aya ha inshes chest mangwai thi hay ai ha ur iss ka ilawa stuff bhe acha ha well done daraz	Negative	['size', 'chest', 'stuff']
1024	MA305FA0ATC9ANAFAMZ	Hd	2152	2017-10-01	5	0	mza aa gya bht awla shirts hain size bhi filkul fit	Positive	['shirts', 'size', 'fit']
1025	MA305FA0WF10CNAFAMZ	gfffyiyiyiyiui	6556	2017-07-13	1	0	bht bura stuf tha ur item bhe gallt dia	Negative	['stuf']
1026	MA305FA0WF10CNAFAMZ	Asad	966	2016-08-13	4	0	in this price its good recommend tu others	Positive	['good', 'recommend']
1027	SH069FA039PJONAFAMZ	muhammad	6917	2017-09-23	5	0	aaj hay recive kia h parcel awesome design hai kapra b bohot acha hai kisi kisam ka koi issue nhe hai behtareen service	Positive	['parcel', 'awesome', 'design', 'kapra', 'issue', 'behtareen']
1028	SH069FA039PJONAFAMZ	Hamza	2020	2018-08-26	5	1	amazing offer love this	Positive	['amazing', 'offer']
1029	SH069FA039PJONAFAMZ	Vishal Khemchandani	5815	2019-12-10	5	0	price ke hisaab se accra hay	Neutral	['hisaab']
1030	SH069FA039PJONAFAMZ	Zain Javed	6073	2017-10-02	5	0	overall its awsome price ke hisaab sa achi ha	Negative	['awsome', 'hisaab', '']
1031	SH069FA039PJONAFAMZ	Usman	5754	2018-02-15	2	0	thay issue eay faced was that thay black shirts fabric was nut good and it was looking like aas it has been washed while with grey shirt thay collar was poorly finished nu finishing it looked very ugly although grey one hadd good fabric bot stitching was nut good aas well	Positive	['issue', 'faced', 'black', 'shirts', 'fabric', 'good', 'grey', 'collar', 'finishing', 'ugly', 'grey', 'good', 'fabric', 'bot', 'stitching', 'good']
1032	MA305FA1KY528NAFAMZ	Omair Sajjad	4128	2017-04-23	5	1	behtareen jesi yeh shirts yahan dikhai gai hain mjhe bilkul wohi receive hui hain na color mein koi difference hai na hi iske material may aur mjhe bohat pasand ai hain size aur fitting b accurate thi bilkul aur inki quality se mein kaafi khush aur mutmaeen hon	Positive	['behtareen', 'shirts', 'receive', 'color', 'difference', 'material', 'pasand', 'size', 'fitting', 'accurate', 'quality', 'khush']
1033	CA825FA0D4DLONAFAMZ	Shahbaz Khan Tanoli	5022	2017-08-19	5	0	mujay bohat achi lagi hai ur eay like it kaafi bethr watch hai per packing good nahi thay mein samja packing achi ho gei per watch bohat achi thay	Positive	['watch', 'packing', 'good', 'packing', 'watch']
1034	MA305FA1KY528NAFAMZ	Technical Ejaz	5597	2018-03-03	5	0	boht hay achi tshirts hain kapra bhi thek hai ur size bhi perfect mila hai	Positive	['tshirts', 'kapra', 'thek', 'size', 'perfect']
1035	MA305FA1KY528NAFAMZ	Hassan	2115	2017-08-21	2	1	jab t shirts shuru may aein tu lafi achi lag rahi thi lekin kuch alag kapra tha ur kuch alag size bhi sab ka faraq th lekin koi nhi theek tha lekin jab mene pehni ur uske baad wash ki tu kapray ki maa bhen ek ho gai ur kapra pehnay k kabi bhi nhi raha sab tshirts ka yehi haal tha bilkul achi nahi thi dhulne k baad	Negative	['shirts', 'kapra', 'size', 'faraq', 'wash', 'kapray', 'kapra', 'pehnay', 'tshirts', 'dhulne']
1036	MA305FA1KY528NAFAMZ	Muaz Butt	3449	2018-09-11	4	1	maine ye apne ur apne dost ke liye mangwai thi ur mujhe yeh bohot pasand ai kyun ke sab se achi baat uski yeh lagi thi ke yeh bohot comfortable hai pehnnay mein ur raat ko pehnnay mein buri bhi nahi lagti jab mein inhe trousers pe pehnta hon	Positive	['maine', 'pasand', 'comfortable', 'pehnnay', 'raat', 'pehnnay', 'buri', 'trousers']
1037	MA305FA1KY528NAFAMZ	Ali Raza	628	2018-05-15	4	1	mein daraz ka bohot purana customer hon ur hamesha ki tarah iss baat bhi mera experience acha raha sab se achi cheez in shirts k baray mein yeh hai k price kaam hai lekin shirts ki quality bohat achi hai shirts ka kapra bohat halka hai aur naram b hai pehen k bohat hi sukoon milta hai aur mjhe saray yehi colors mile jo yahan dikhaye gaye hain aur sab asli mein b itnay hi achay hain jitne yahan la…	Positive	['purana', 'customer', 'experience', 'shirts', 'baray', 'shirts', 'quality', 'shirts', 'kapra', 'halka', 'naram', 'sukoon', 'colors', 'asli']
1038	PE859FA0PDALGNAFAMZ	talha	7321	2019-09-13	5	0	kaafi acha sath dia north trip pe inhon ne while trekking upto fairy meadows	Positive	['trekking', 'fairy', 'meadows']
1039	MA305FA1KY528NAFAMZ	Muhammad Arif	3521	2017-03-30	5	0	rates bohot munasib hain aur shirts behtareen	Positive	['rates', 'munasib', 'shirts', 'behtareen']
1040	MA305FA1KY528NAFAMZ	Azlan Khan	1184	2019-06-08	4	0	yeh pack of iss price ke hisaab se acha hai bus iss mein ek masla yeh hai ke saari tshirts same nahi hain thori thori alag hain jese ke inke galay kuch tshirts ke neck fit hain ur kuch ke thoray dheelay laken overall in paison mein mein kehna chahunga ke ye achi cheez hai ur comfortable bhi hain mein inhe aas aan inner pehnta hon ur bhbot achi hain	Positive	['pack', 'hisaab', 'bus', 'masla', 'tshirts', 'thori', 'thori', 'tshirts', 'fit', 'thoray', 'dheelay', 'paison', 'comfortable']
1041	GE310FA1HFXXGNAFAMZ	Shahbaz	5020	2018-10-16	5	0	silent alarm ya vibrate alarm hi iss may subha uthny k liye	Neutral	['silent', 'alarm', 'vibrate', 'alarm']
1042	GE310FA1HFXXGNAFAMZ	Nasir Nawaz	3958	2019-09-25	4	0	eay was quite satisfied with this productthe finishing and aesthetics were pretty decentnot great bot thay were acceptablethe functionality was great aas well aas all thay other things work which iss why eay aam quite happy with thay quality of this product	Positive	['satisfied', 'productthe', 'finishing', 'aesthetics', 'pretty', 'decentnot', 'bot', 'acceptablethe', 'functionality', 'work', 'happy', 'quality']
1043	GE310FA1HFXXGNAFAMZ	Ubedullah Baloch	5657	2017-03-02	1	0	yar ye meine ye soch ke mangwayi thi ke mein jo running karta hon mujhe uska track record rahay roz ka laken iss mein ye masla hai ke jis cheez ke liye ye banai gai hai us kaam mein hi achi nahi hai iska display bilkul bright nahi hai dhoop mein kuch nazar nahi aata apko haath se shade dena parhta hai secondly yeh mobile se connect nai hora kyunkay iski app playstore pe hai hi nahi pata nai kahan…	Negative	['soch', 'track', 'record', 'roz', 'masla', 'display', 'bright', 'dhoop', 'haath', 'shade', 'parhta', 'connect', 'playstore', 'download']
1044	GE310FA1HFXXGNAFAMZ	AsjadRex	1038	2016-11-15	5	0	eay aam totally satisfied with thay product quality bay sure tu get thay warranty card requested if you dont receive it along thay package eay requested daraz pk and thay are cooperative aas always apart from that if you dont usay thay bluetooth synced all thay time than battery will last for two three days happy with daraz pk only best online shopping store eay trust eay order once ur twice ever…	Positive	['satisfied', 'quality', 'warranty', 'card', 'requested', 'receive', 'package', 'requested', 'cooperative', 'bluetooth', 'synced', 'time', 'battery', 'days', 'happy', 'best', 'online', 'shopping', 'store', 'trust', 'order']
1045	AY536FA11G0ZMNAFAMZ	gulkhan	6569	2018-03-09	5	0	bhetreen kapra hai kaam paiso maa	Negative	['bhetreen', 'kapra', 'paiso']
1046	MA305FA1KY528NAFAMZ	Nauman	3968	2019-09-09	1	0	may ne isi pic ko daikh ker order kia tha daraz walo ne mere se cheating ki ha black ki jaga yellow baijhi ha	Negative	['pic', 'order', 'cheating', 'black', 'yellow']
1047	MA305FA1KY528NAFAMZ	Shahid Mahmood	5038	2019-06-17	5	0	sab se achi cheez in shirts k baray mein yeh hai k price kaam hai lekin shirts ki quality bohat achi hai shirts ka kapra bohat halka hai aur naram b hai pehen k bohat hi sukoon milta hai aur mjhe saray yehi colors mile jo yahan dikhaye gaye hain aur sab asli mein b itnay hi achay hain jitne yahan lag rahay hain	Positive	['shirts', 'baray', 'shirts', 'quality', 'shirts', 'kapra', 'halka', 'naram', 'sukoon', 'colors', 'asli']
1048	GE310FA1HFXXGNAFAMZ	Mudassir Sajwani	3472	2016-09-26	5	1	iss ke baray faiday hain yeh band jab se meine lia hai mein bohat khush hon iss mein who sab kuch hai jo meine umeed ki thi aur battery life bari achi rahi hai jab bhi mein subah ya shaam jog ke liay nikalta hon tou ismein jo step counter aur heart rate monitor hai uski madad lekar apne aap ko jaanchta hon aur iss se yehi maloom hua ke aisay products ki bohat zaroorat hai logon mein	Positive	['baray', 'band', 'khush', 'umeed', 'battery', 'bari', 'subah', 'shaam', 'jog', 'nikalta', 'heart', 'rate', 'monitor', 'madad', 'maloom', 'aisay', 'products', 'zaroorat', 'logon']
1049	GE310FA1HFXXGNAFAMZ	&lt;3	2	2017-11-19	4	1	yeh fitness band bohat hi acha hai aur mere roz kaam aata hai iss ko subah subah jab jog pe jata hon tou pehn kar dekta hon ke kitne steps leye hain uske elawa quality bhi kaafi pasand aayi mujhe soft sa iska band hai aur health conscious logo ke liay ismein heart beat monitor bhi hai mera experience iss ke sath kaafi acha gaya ahi	Positive	['fitness', 'band', 'roz', 'subah', 'subah', 'jog', 'quality', 'pasand', 'soft', 'band', 'health', 'logo', 'heart', 'beat', 'monitor', 'experience']
1050	GE310FA1HFXXGNAFAMZ	Muhammad taj	3702	2019-11-13	5	0	mujhe tou yeh fitness band bohat pasand aya hai yeh tou mujhe har din update akrta rehta hai ke mera heartrate aur mere total steps saray calcultae karke show karta hai aur battery life bhi bohat zyada chalti hai iski	Negative	['fitness', 'band', 'pasand', 'din', 'update', 'akrta', 'heartrate', 'total', 'calcultae', 'show', 'battery', 'chalti']
1051	GE310FA1HFXXGNAFAMZ	Zubair Rashidi	6183	2018-07-15	4	0	yeh getiit fitness band bari eham cheez hai iss se mein hamesha update rehta hon ismine mukhtalif setting sbhee hains sleep mode alarm mode notifications deta hai yeh bhi aur iski battery tou aik charge mein hi hafta chala leti hai	Positive	['fitness', 'band', 'bari', 'update', 'mukhtalif', 'setting', 'sleep', 'alarm', 'notifications', 'battery', 'charge', 'hafta']
1052	GE310FA1HFXXGNAFAMZ	Saad Malik	4629	2017-07-25	4	0	yeh band tou bohat madadgaar hai iss se mein apne sehat ka bhi andaza laga sakta hon calorie tracker bhi hai aur steps bhi record karta hai mein bohat khush hon iski kareedari se aur dosaron ko bhi recommend karunga	Positive	['band', 'madadgaar', 'sehat', 'andaza', 'calorie', 'tracker', 'record', 'khush', 'dosaron', 'recommend']
1053	FA628FA1G8F6YNAFAMZ	Mariyam	3042	2016-11-05	5	0	achay hn bot	Neutral	['bot']
1054	SH847FA13HMRANAFAMZ	Yousaf	5995	2016-09-27	5	0	bot acha aa mujy bot acha laga	Positive	['bot', 'bot']
1055	MA305FA1KY528NAFAMZ	Riaz Khan	4471	2018-10-17	4	1	price k lehaz se bohat achi hain kapra bohat hi halka aur naram hai ghar mein roz marra istemaal k liye tw behtreeen hai shirts ki variety b ziada quality b achi aur dhulne k baad na color kharab hua na hi yeh shrink huui	Positive	['lehaz', 'kapra', 'halka', 'naram', 'roz', 'behtreeen', 'shirts', 'variety', 'ziada', 'quality', 'dhulne', 'color', 'shrink']
1056	MA305FA1KY528NAFAMZ	basharat wattoo	6413	2019-06-25	3	1	bhot mota kapra tha mujhe tu roz pehnnay ke liye chahiye thi laken ye tshirts sirf sardiyoon mein pehni ja sakti hain kyunkay ye bhot garam hain uske ilawa inka color bhi thorha fade hua wa hai price kaam thi iski yeat bhot achi hai	Positive	['mota', 'kapra', 'roz', 'pehnnay', 'tshirts', 'sardiyoon', 'garam', 'color', 'fade']
1057	MA305FA1KY528NAFAMZ	Abdullah	231	2016-08-08	2	0	nu doubt quality bht achi ha magar mene yeh white shirt order ki thi mgr package may baki saray colour same thay bot white ki jagha yellow tha ur blue ka size large tha ehtiyat kia karo daraz management haram k paisay nai hain logon k	Negative	['doubt', 'quality', 'white', 'order', 'package', 'colour', 'bot', 'white', 'jagha', 'yellow', 'blue', 'size', 'large', 'management', 'haram', 'paisay', 'logon']
1058	MA305FA1KY528NAFAMZ	Mehar Husnain	3094	2017-03-18	4	1	yeh shirts bohat hi achi lagin mjhe kyun k inka kapra bilkul garmiun k lehaz se munasib hai naram b hain aur pehenne mein aramday bhi size mjhe sbka sahi aya bs blue wali thori si choti thi baqi charon sahi aayi mein inko pehen k bohat sukoon mehsoos karta hon	Positive	['shirts', 'kapra', 'garmiun', 'lehaz', 'munasib', 'naram', 'pehenne', 'aramday', 'size', 'blue', 'thori', 'choti', 'sukoon', 'mehsoos']
1059	DA290FA01AS88NAFAMZ	khan	6771	2017-11-13	5	0	beutyfull	Neutral	['beutyfull']
1060	OA551FA1D5IFSNAFAMZ	Jamshed Iqbal	2441	2018-11-18	4	0	its good aas compare tu price may aur kya milega	Positive	['good', 'compare']
1061	OA551FA1D5IFSNAFAMZ	umi	7361	2018-10-07	5	0	lekin hard bht ha	Negative	['hard']
1062	GE310FA1HFXXGNAFAMZ	TOUSEEF	5480	2018-09-23	5	0	mein satisfy hon iss product se kiu k agar apka mobile apki paas na ho ur call ajae tu apko notify mil jata mein mutmaen hon iss product se ur iski quality se	Negative	['satisfy', 'call', 'notify', 'quality']
1063	OA551FA1B35TGNAFAMZ	sajjad	7131	2017-11-28	1	0	bilkul bekar shoes send karte hn koi bay na kare mn bhi le kar pashta raha hn	Negative	['bekar', 'shoes']
1064	MA563FAEPDPLNAFAMZ	Sharif	5127	2019-03-07	5	0	sharifkhan	Neutral	[]
1065	MA305FA1KY528NAFAMZ	Omer Mirza	4138	2018-08-09	5	1	achi shirts hain har lehaz se price mein kaam hain lekin quality k sath koi compromise nahi stuff bohat hi light hai aur pehen k bohat hi sukoon feel hota hai fitting b mjhe theek ai bs size ka thora issue tha grey wali small size thi lekin uske elawa sb bilkul sahi tha	Negative	['shirts', 'lehaz', 'quality', 'compromise', 'stuff', 'light', 'sukoon', 'feel', 'fitting', 'size', 'issue', 'grey', 'small', 'size']
1066	OA551FA1B35TGNAFAMZ	Ahmad	430	2020-01-29	1	0	bilkul rd class quality hai agar koi b cheez jo dikhao wohi customer ko deni chahiye laikin yahan aisa bilkul b nahi kindly carefully fulfil your commitments	Negative	['class', 'quality', 'customer', 'carefully', 'commitments']
1067	MA305FA0YA7AENAFAMZ	Kashif Kamran	2601	2017-09-30	4	0	in trousers ki quality itni koi khaas nahi hai lekin phir b kaafi achi hai price k lehaz se kapra naram hai aur pehenne may sukoon deta hai length aur fitting mjhe bilkul perfect ai isliye mjhe iss se kisi kism ki koi shikayat nahi bs agar quality thori aur behtar hojati tw yeh trousers ziada achay lagtay	Positive	['trousers', 'quality', 'khaas', 'lehaz', 'kapra', 'naram', 'pehenne', 'sukoon', 'length', 'fitting', 'perfect', 'shikayat', 'quality', 'thori', 'trousers', 'ziada']
1068	MA305FA138634NAFAMZ	Bilal	1273	2020-01-21	1	1	boht awla adv karti hain ur bakwas tareen stitching ur stuff bewaqoof mat bnye mohtrm ye tu advertisment ur istrha ki chizen bech k daraz ka name kharab kar ri hn	Negative	['bakwas', 'stitching', 'stuff', 'bewaqoof', 'advertisment', 'chizen']
1069	MA305FA138634NAFAMZ	Daniyal Ali khan	1412	2017-02-22	5	0	aala quality k pajamas hain yeh inka kapra bohat hi naram hai aur pehen k bohat sukoon milta hai sonay k liye b zbrdst hai aur bahir chilling willing k liye b theek hai bilkul silai b sahi hui hai aur price k lehaz se tw yeh pack hai hi zabardast	Positive	['quality', 'kapra', 'naram', 'sukoon', 'zbrdst', 'chilling', 'silai', 'lehaz', 'pack', 'zabardast']
1070	HY086FA1HOWXINAFAMZ	Muhammad	3482	2017-09-22	5	0	bohat jaldi received howa aur bohat behtar qaulity hai iss keemat mein	Positive	['jaldi', 'received', 'qaulity', 'keemat']
1071	MA305FA1KY528NAFAMZ	Dr. Sohail Rana	1480	2020-01-17	2	0	mein iss baat se bohat hi mukhalif hon k jo tasveer may dikhatay hain wo asal may hota nahi hai in shirts ki stitching aur size tw bilkul theek hai lekin kapra aisa hai k aik du baar dhool k hi kharab hogaya hai ruaan agaya ahi aur shine bilukl khatam hogai aur ab yeh shirts pehenne k qabil tw nahi rahi isliye ghar ka pooocha hi banana para mere betay ne yeh apne liye mangai thi aur mushkil se du…	Negative	['tasveer', 'asal', 'shirts', 'stitching', 'size', 'kapra', 'dhool', 'shine', 'khatam', 'shirts', 'pehenne', 'qabil', 'banana', 'mushkil']
1072	SU455FA18NJ18NAFAMZ	Ghazanfar Khan	1863	2017-03-31	1	1	mene watches order ki thi par aik watch may lock handle nai aya sath	Neutral	['watches', 'order', 'watch', 'lock', 'handle']
1073	MA305FA0YA7AENAFAMZ	Muhammad Dar	3546	2017-12-04	4	0	size aur fitting se lekkar kapray ki quality sab se mein mutmaeen hon achay rate per available thay aur design aur pattern bhi jaisa website pe dekhaya gaya tha waisa hi deliver hua hai	Negative	['size', 'fitting', 'kapray', 'quality', 'rate', 'design', 'pattern', 'website', 'deliver', '']
1074	MO114FA1L5XM8NAFAMZ	sarfraz rana	7171	2018-05-04	3	0	qualtiy aur size bauht acha hai	Positive	['qualtiy', 'size']
1075	MA305FA1KY528NAFAMZ	Nadeem Shahzad	3883	2017-03-01	4	1	price k lehaz se theek hai isliye star rating deraha hon quality se b mjhe koi shikayat nahi hai acha kapra hai naram b hau aur iss mosam k lehaz se kaafi behtareen hai qk patla hai tw ziada garmi ka ehsas nahi hota pehen k bs aik cheez se bohat na khush hua hon mein aur wo hai size mene yeh shirts apne liye mangai theen aur xl order kiya tha lekin jab yeh parcel mosul hua tw xl dekh k heran hi r…	Negative	['lehaz', 'rating', 'quality', 'shikayat', 'kapra', 'naram', 'lehaz', 'behtareen', 'patla', 'ziada', 'khush', 'size', 'shirts', 'order', 'parcel', 'heran', 'chota', 'size', 'logon', 'built', 'lehaz', 'small', 'size', 'shirts', 'pehlay', 'size', 'issue', 'quality', 'pehenne', 'kapra', 'munasib', 'dekha']
1076	MA305FA1KY528NAFAMZ	Muhammad Afzal	3496	2019-01-15	5	1	this iss one great pack with soch attractive colors nut only thay cotton quality iss impressive bot thay stitching iss soo neat and thay size iss perfect thay stuff iss soo good and thay variety of colors has maday this pack aa worthy purchase it s aa good pack for chilling casually ur for aa comfortable sleep aas well	Positive	['pack', 'soch', 'attractive', 'colors', 'cotton', 'quality', 'impressive', 'bot', 'stitching', 'neat', 'size', 'perfect', 'stuff', 'good', 'variety', 'colors', 'maday', 'pack', 'worthy', 'purchase', 'good', 'pack', 'chilling', 'comfortable', 'sleep']
1077	MA305FA1KY528NAFAMZ	Hamza Siddiqui	2039	2019-10-12	5	1	un for now because eay havent washed them bot im content with thay quality of these tees and thay darazs services thay material iss soo comfy and eay feel snug in these shirts this pack didn t include aa yellow color tee bot eay got that one instead of grey well its okay i kept it because of thay good qualityy stuff and perfect fitting bi looking aat it eay though thay size iss large bot it fits …	Positive	['bot', 'content', 'quality', 'tees', 'darazs', 'services', 'material', 'comfy', 'feel', 'shirts', 'pack', 'yellow', 'color', 'bot', 'grey', 'good', 'qualityy', 'stuff', 'perfect', 'fitting', 'size', 'large', 'bot', 'fits', 'mi', 'body', '']
1078	AY536FA04VR1WNAFAMZ	Shehryaar	5173	2018-09-23	1	0	jacket ki quality achi nahi hai	Negative	['jacket', 'quality']
1079	AY536FA04VR1WNAFAMZ	farhan	6526	2017-08-28	5	0	nice cool	Neutral	['nice', 'cool']
1080	MA305FA16BB38NAFAMZ	Nadia Bhatti	3887	2019-03-16	4	0	mujhe dono hoodies ka color bohat acha laga blue jeans ke sath color aur suit karta hai har tarha se mutmayeen hon	Positive	['hoodies', 'color', 'blue', 'jeans', 'color', 'suit', 'mutmayeen']
1081	AY536FA1JBKTANAFAMZ	Faraz Haider	1695	2019-06-09	4	0	stuf acha hi ur delivery kaafi jaldi ai hi	Positive	['stuf', 'jaldi']
1082	DE901FA19VWKMNAFAMZ	ihtesham khan	6663	2016-10-03	1	0	kuch khaas nhi hai	Neutral	['khaas']
1083	MA305FA1KY528NAFAMZ	Ameen Yousuf	717	2016-06-05	4	0	munasib keemat mein achi quality ki shirts eyh tou bara acha hogaya mere liay shirts ka material bara acha hai ramzan ke dinnoun mein garmi kaatne ke liay bohat kaam ayega aur saray colours se mein mutmaeen jis mein se pasandeeda black wala hai	Positive	['munasib', 'keemat', 'quality', 'shirts', 'bara', 'shirts', 'material', 'bara', 'kaatne', 'pasandeeda', 'black']
1084	MA305FA1KY528NAFAMZ	Mustafa Ahmed	3801	2018-04-06	5	0	simple si shirts hain lekin inka fabric bara acha hai aur in garmuin ke liay best hai paanchon rung se mein bohat khush hon aur sab mujh per best lagtay hain dd iss ko mein poooray mein se dunga	Positive	['simple', 'shirts', 'fabric', 'bara', 'best', 'rung', 'khush', 'best', 'poooray']
1085	MA305FA1KY528NAFAMZ	Abid Zafar	283	2017-11-02	5	0	perfect size perfect fitting aur perfect colours mein tou bohat khush hon in shirts se jaisay mangii thi waisay hi deliver hui hain aur garmiun ke liay yeh cotton material sab se acha hai zyada agrmi bhi nai lagti aur skin rash bhi nai hotay	Positive	['perfect', 'size', 'perfect', 'fitting', 'perfect', 'khush', 'shirts', 'deliver', 'garmiun', 'cotton', 'material', 'skin', '']
1086	MA305FA16BB38NAFAMZ	Mr. Zaheer	3324	2016-07-07	4	0	mein tou in dono jacket se khush hon black wali grey wali se behtar lagti hai lekin quality dono ki aala hai aur dono mein koi nuks nai hain	Negative	['jacket', 'khush', 'black', 'grey', 'quality', '']
1087	AY536FA1JMH38NAFAMZ	Fahad Ali	1605	2017-02-20	1	0	bakwas jo dakhnay mai hai wesi bilkul nahi mein ne khud liay hai lahore k address pe deliver hui hai aur farig presented	Negative	['bakwas', 'address', 'deliver', 'farig', 'presented']
1088	MO114FA0Z08N4NAFAMZ	Tayyab	5586	2016-10-05	5	0	iss mein xl se bara size hai	Negative	['bara', 'size']
1089	AY536FA1JMH38NAFAMZ	Sonia Mishal	5308	2017-08-15	3	1	kaafi rough si feel hai iski pehnay mein comfortable tou hai liken kapra itna naram nahi hai aur bhari mehsoos hota hai	Positive	['rough', 'feel', 'pehnay', 'comfortable', 'kapra', 'naram', 'bhari', 'mehsoos']
1090	AY536FA1JMH38NAFAMZ	Sumair Hanif	5339	2019-06-23	3	0	waisay pehnnay waghera mein garam hai liken quality thori halki lagi mujhe iski kyunkay thoray hay dinn mein purani purani si lagnay lagi	Negative	['pehnnay', 'garam', 'quality', 'thori', 'halki', 'thoray', 'purani', 'purani']
1091	AY536FA1JMH38NAFAMZ	Qasid Abbasi	4231	2017-10-07	4	0	thay fleece jackets best thing iss surely its low price eay aam happy tu have gotten aa pretty decent looking warm jacket	Negative	['fleece', 'jackets', 'best', 'low', 'happy', 'pretty', 'decent', 'warm', 'jacket']
1092	AY536FA1JMH38NAFAMZ	M. Abdullah&#039;	2794	2017-03-05	2	0	eay have ordered this fleece jacket twice once in black aa while back and now this and eay was really surprised aas thay black one was soo good and this one just isnt hitting thay right spot it may look good bot thay quality of thay fabric iss really low	Neutral	['ordered', 'fleece', 'jacket', 'black', 'back', 'surprised', 'black', 'good', 'spot', 'look', 'good', 'bot', 'quality', 'fabric', 'low']
1093	AY536FA1JMH38NAFAMZ	Zuhaib Shaikh	6191	2017-03-25	4	1	price ke hisaab se quality achi farham ki gayi sardiyoon ke liye mufeed saabit hui kyunkay kapra kaafi garam hai	Negative	['hisaab', 'quality', 'sardiyoon', 'mufeed', 'saabit', 'kapra', 'garam']
1094	MA305FA1KY528NAFAMZ	Rayyan Irfan	4430	2017-10-12	5	0	mein in shirts ki quality aur stitching se mutmaeen hon itni achi size ki shirts aur colour quality bhi aisi ke wash mein jaakar bhi fade na ho in sab ko maddenazar rakh kay price mein bohat fit hain	Positive	['shirts', 'quality', 'stitching', 'size', 'shirts', 'colour', 'quality', 'wash', 'fade', 'fit']
1095	MA305FA1KY528NAFAMZ	yousuf Ghani	7442	2019-09-10	4	1	sahi hain yeh shirts aur inki quality bhi pasand aayi mujhe variety bari hain in shirtoun mein aur inners ke liay bohat acha alternative hai yeh	Positive	['shirts', 'quality', 'pasand', 'variety', 'bari', 'shirtoun', 'inners']
1096	AY536FA08JT86NAFAMZ	suhaib	7282	2020-01-18	5	0	hay tu boht acha bot color kutton ne kiu aurbdia hay	Positive	['bot', 'color']
1097	AY536FA1JMH38NAFAMZ	Abdul Qadir	192	2017-06-30	3	1	quality thori halki lagi mujhe iski kyunkay thoray hay dinn mein purani purani si lagnay lagi waisay pehnnay waghera mein garam hai	Negative	['quality', 'thori', 'halki', 'thoray', 'purani', 'purani', 'pehnnay', 'garam']
1098	AY536FA1JMH38NAFAMZ	Farhan Bashir	1707	2020-01-03	3	1	kaafi rough si feel hai iski pehnay mein comfortable tou hai liken kapra itna naram nahi hai aur bhari mehsoos hota hai	Positive	['rough', 'feel', 'pehnay', 'comfortable', 'kapra', 'naram', 'bhari', 'mehsoos']
1099	AY536FA183EKENAFAMZ	Usman	5754	2017-02-08	3	0	kapra mota nhi hi bot kisi t shirt k uper chl jae ga fashion k tor par bot advice hi mat lo	Negative	['kapra', 'mota', 'bot', 'fashion', 'tor', 'bot', 'advice']
1100	AY536FA183EKENAFAMZ	Nawaz Khan	3998	2018-12-15	1	0	bht e ghatia fabric jo pic mein nazar aa ra wo ye chez e nai hi im really disappoint mein first time daraz se experience kiya ur bht bura experience rha	Negative	['ghatia', 'fabric', 'pic', 'disappoint', 'time', 'experience', 'experience']
1101	AY536FA1LOJRINAFAMZ	hassnain	6626	2017-12-02	5	0	achi hai	Positive	[]
1102	MA305FA1KY528NAFAMZ	Aleem	582	2017-06-11	5	1	mashaallah se yeh pura pack bohat acha hai quality bhi wazeh horahi hai ke bari achi hai aur size mein hi best hai bara acha shopping experience raha hai	Positive	['mashaallah', 'pack', 'quality', 'wazeh', 'bari', 'size', 'best', 'bara', 'shopping', 'experience']
1103	AY536FA183EKENAFAMZ	Azan ALi	1162	2018-11-07	5	0	kaafi comfortable hai pehnnay mein aur black color honay ki wajha se ye har cheez par chal jati hai mein islye aksar ye hoodie pehnta hon liken shukar hai fitting waghera sub theek hai phr bhi	Positive	['comfortable', 'pehnnay', 'black', 'color', 'wajha', 'aksar', 'hoodie', 'shukar', 'fitting']
1104	AY536FA1JMH38NAFAMZ	Farhan Mustafa	1712	2019-01-08	3	1	iss se betar material istemaal karte tou zyada etar hota iss mien tou garmi hi nai lagtee balkay material itna halka hai ke sardiyoon ke bajaye garmiun mein istemaal karo	Neutral	['material', 'material', 'halka', 'sardiyoon', 'garmiun']
1105	AY536FA1JMH38NAFAMZ	Abdul haseeb	211	2018-03-01	4	0	bas iska kapra thora halka hai lekin b aky sab kuch zabardast socha tha ke shahyed mota kapra aye lekin yeh bhi istemaal ke qabil hai	Positive	['kapra', 'halka', 'zabardast', 'mota', 'kapra', 'qabil', '']
1106	AL748FA0B7NM2NAFAMZ	Asad Khan	974	2020-01-30	2	0	bas kaam chalao hain acceptable quality	Negative	['chalao', 'acceptable', 'quality']
1107	AL748FA0B7NM2NAFAMZ	Rashid	4417	2016-03-15	1	0	bakwas	Negative	['bakwas']
1108	NE616HB0SFP20NAFAMZ	Karim Sattar	2587	2017-05-27	4	0	mein iski fabric aur fitting se kaafi mutmaeen hon kiunkay jitna comfortable iss ka fabric hai uska double impact user per parhta hai bilkul aik body shaper ki tarhan kaam karta hai aur slim fitting wali shirts ba aasani pehn sakta hon ab	Positive	['fabric', 'fitting', 'comfortable', 'fabric', 'impact', 'parhta', 'body', 'shaper', 'slim', 'fitting', 'shirts', 'aasani', '']
1109	DA523FA07W4ACNAFAMZ	Bilal	1273	2019-08-27	1	1	mangwa kar galti hogai thi bilkul ghatiya hai	Negative	['galti']
1110	AY536FA1LOJRINAFAMZ	gulkhan	6569	2017-05-23	5	0	sardio k liy bht acha tha bht garam kapra hai	Positive	['garam', 'kapra']
1111	AY536FA1LOJRINAFAMZ	manzor	6847	2019-03-20	5	0	good hai bht achi jackat hai sar	Positive	['good', 'jackat']
1112	CH132FA0YAA56NAFAMZ	Nashia Rafiq	3946	2018-11-05	2	0	itna chota sa pendant meine size ka andaza nai lagaya tha lekin iss price mein itna bhi chota nai hona chaiye quality tou sahi ha lekin size ka issue hai dil bharr gaya	Negative	['chota', 'pendant', 'size', 'andaza', 'chota', 'quality', 'size', 'issue', 'dil']
1113	CH132FA0YAA56NAFAMZ	Fatima	1761	2017-04-01	4	0	jaisa dekha tha waisay bhi deliver kia hai price bhi achi hai aur gift bhi acha khaasa ban sakta hai yeh	Positive	['dekha', 'deliver', 'gift', 'ban', '']
1114	BR487FA0UPBVINAFAMZ	Haseeb	2089	2018-04-28	1	0	bht bekar quality hay chubh rahay hen aankho may	Negative	['bekar', 'quality']
1115	BR487FA0UPBVINAFAMZ	Mizna	3182	2018-04-13	1	0	bht low quality k hain lgate hi ankh may mirchain lgti n chubhte bht	Negative	['low', 'quality']
1116	BR487FA0UPBVINAFAMZ	Guriya khan	1912	2019-12-12	1	0	please mat khareedna koi b mainy mangway hain itni low quality hai ankh mein fix e ny hoti ur chubty hain ankh mein ur headache start ho jata hai please koi b na khareedi mainy b paisy waste kiye	Negative	['khareedna', 'low', 'quality', 'fix', 'headache', 'khareedi', 'waste']
1117	SO724FA0SL91QNAFAMZ	hadi hassan Nic name hadi	6577	2019-08-28	1	0	sir may ye samaan lena chata ho	Neutral	['samaan']
1118	SO724FA0SL91QNAFAMZ	rayyan mehdi	7070	2019-02-23	5	0	mai boht zada mutmayeen hon iss locket se kyunkay mjhe ye aik dum aisi hay mili hai jaisi ye picture mai dikhayi gayi thi aur mjhe iski quality bhi pasand aayi dono chain aur locket bilkul sahi thi aur pehnnay mai bhi bilkul buri nahi	Positive	['mutmayeen', 'locket', 'picture', 'dikhayi', 'quality', 'pasand', 'chain', 'locket', 'pehnnay', 'buri']
1119	ZA401FA0XT2ECNAFAMZ	Maisam Israr	2975	2019-12-27	3	0	yeh ring website pe tou bari pyari lagrahee hai lekin asal mein itni khaas nai hai ispe uper jo zirconum laga hai who acha hailekin band patla sa hai aur itna acha nai lagraha looks mein goft tou dedia hai aur unhoun ne koi shikayat nai kee lekin mera dil khud nai maan raha isko	Negative	['ring', 'website', 'bari', 'pyari', 'asal', 'khaas', 'hailekin', 'band', 'patla', 'looks', 'shikayat', 'dil']
1120	CH132FA03BQOQNAFAMZ	Aisha Khan	536	2019-03-15	5	0	bilkul zabardast experience tha aur mai boht khush hon ke ye necklacebilkul waisa hay tha jaisa ye picture mai dikhaya gaya tha aur iska design boht khobsorat hai aur pehnnay mai bhi kaafi acha lagta hai tou koi shikayat nahi hai	Positive	['zabardast', 'experience', 'khush', 'picture', 'design', 'khobsorat', 'pehnnay', 'shikayat']
1121	TH101FA0VA6Y4NAFAMZ	Shazia	5151	2018-10-20	5	0	bohot khoob	Positive	[]
1122	TH101FA0VA6Y4NAFAMZ	Abdullah Nadeem	246	2016-09-02	4	0	zabardust	Positive	['zabardust']
1123	TH101FA1D573GNAFAMZ	Kashan ur rehman	2594	2016-11-20	1	0	pic k mutabik nahi hai milta	Neutral	['pic']
1124	MA531FA024JR8NAFAMZ	Nasar	3939	2018-10-09	5	0	nice product good quality fast shipping reasonable price	Positive	['nice', 'good', 'quality', 'fast', 'reasonable']
1125	HO710FAENMNMNAFAMZ	Arif	902	2016-02-17	1	0	achay quality nai hai ur watch k jo dailer hain wo fit hay nai hoti mein sy sirf hay fit hota hai eay m nut happy	Negative	['quality', 'watch', 'fit', 'fit', 'happy']
1126	CO386FA0COCLQNAFAMZ	Khuzaifah	2681	2019-10-04	5	0	karahi achi hai lekin kapra kuch acha nahin lawn cotton nahin kuch ur hai jese latha hota hai wesa hai per theek hai	Positive	['kapra', 'lawn', 'cotton']
1127	MA531FA1194G4NAFAMZ	mein bohat khush hoon	6872	2016-06-26	5	0	yeh sandals bohat hi pyarri hai aur iss ka material waqaii hi imported grade ka lagta hai mazboot bhi hai aur aramday bhi isko har din ke sitemal ke liay rakha hua hai aur pairoun pe zydad dard bhi nia hoti	Positive	['material', 'waqaii', 'imported', 'grade', 'aramday', 'din', 'dard']
1128	CO386FA1094X8NAFAMZ	A bhalli	32	2016-11-25	5	0	mujy bht achi lgin hen ye churidaar r ye strechable b hen phnny k baad mzeed khul jati hen	Positive	['churidaar', 'strechable', 'khul']
1129	CO386FA1094X8NAFAMZ	shafqaat hussain	7190	2017-10-21	3	0	white wali tights thori si phatti huin theen jiski wajah se wou tu mein pehen nahi saki liken baki theek hain quality waghera okay hai mere hisaab se	Negative	['white', 'tights', 'thori', 'phatti', 'wajah', 'quality', 'hisaab']
1130	CO386FA1094X8NAFAMZ	Zeeshan	6135	2018-02-23	2	0	thay fabric was good bot stitching was nut good and after wearing these churidaars for once thay stitches are toured off	Positive	['fabric', 'good', 'bot', 'stitching', 'good', 'wearing', 'churidaars', 'stitches', 'toured']
1131	ES033FA1D4W50NAFAMZ	Cadiya	1335	2018-06-22	3	0	although its nut baad bot thay stuff iss nut fleece	Negative	['bot', 'stuff', 'fleece', '']
1132	AG512FA0LOMZINAFAMZ	s..	7097	2016-02-21	5	0	kya cheez ha har kici ne like ki	Positive	[]
1133	AG512FA0LSAX8NAFAMZ	Soha Ali	5291	2016-09-02	3	0	sweater ke fabric ki quality itni pasand nahi aayi thora itchy feel hota hai liken waisay pehnay mein garam hai	Positive	['sweater', 'fabric', 'quality', 'pasand', 'feel', 'pehnay', 'garam']
1134	AG512FA0LSAX8NAFAMZ	Mrs Ihsan	3342	2017-06-24	4	0	thay sweater iss maday out of thick warm cloth yet aat thay same time looks stylish aas well eay really like thay buttons un its side and design un thay collar plus aat thay same time thay quality of thay fabric used iss pretty amazing whats more iss that it fits perfectly aas well and considering its fabric quality eay dont think its going tu loose its fitting any time sun eay aam very much sati…	Neutral	['sweater', 'maday', 'thick', 'warm', 'cloth', 'time', 'looks', 'stylish', 'buttons', 'side', 'design', 'collar', 'plus', 'time', 'quality', 'fabric', 'used', 'pretty', 'amazing', 'fits', 'perfectly', 'fabric', 'quality', 'loose', 'fitting', 'time', 'satisfied', 'happy']
1135	AE766FA0132JANAFAMZ	Huma	2191	2018-05-23	3	0	nice thnks daraz	Neutral	['nice', '']
1136	SP851FA0YYBNSNAFAMZ	Sabhee Ullah	4664	2019-09-01	2	0	mein in dono belts se mutmaeen nai hon chalne mein tou yeh bilkul bhi mazedar nai hai aur iss ko jab bhi pehnna hai bas kuch zyada hi tight mehsoos hota hai aur kuch nai aat	Positive	['belts', 'chalne', 'mazedar', 'tight', 'mehsoos']
1137	CO776FA1EYVU0NAFAMZ	Malik	2987	2017-01-23	5	0	slim logo k liay fit hai	Positive	['slim', 'logo', 'fit']
1138	GE044FA0S37OINAFAMZ	Jahanzaib	2419	2020-01-13	1	0	mein ny jo watch order ki wo deliver nahi hui koi ur si watch deliver kry hi ur quality bhi achi nahi hi	Negative	['watch', 'order', 'deliver', 'watch', 'deliver', 'quality']
1139	AT571FA0KUZRSNAFAMZ	Saad	4618	2017-03-23	1	1	koe bot mt karna meny order kry then bot us may sy ek khatab nikli hi and return bhi nhi kar rhi ye log price km honi ki waja sy	Negative	['bot', 'order', 'bot', 'khatab', 'return', 'log']
1140	AT571FA0KUZRSNAFAMZ	usman ali	7375	2020-01-28	4	0	mjhe tw yeh bohat hi ziada acha hai price iski bohat kaam hai lekin iss mein koi kharabi nahi hai led bright hai aur time b sahi aata hai iss mein doosri baat yeh hai k yeh pehenne mein comfortable hai iska rubber bohat soft hai kaafi stylish lagta hai mjhe tw khush hon mein iss se	Positive	['ziada', 'kharabi', 'led', 'bright', 'time', 'doosri', 'pehenne', 'comfortable', 'soft', 'stylish', 'khush']
1141	AN783FA13IYIGNAFAMZ	Fakhar Abbas	1674	2018-02-04	3	0	watch dekhnay mein tou achi hai liken quality itni koi khaas nahi hai bohat hay halka dial hai aur leather bhi khenchnay se phatt raha hai iski quality agar achi kar dein tou ye kaafi trendy watch hou	Negative	['watch', 'quality', 'khaas', 'halka', 'dial', 'leather', 'khenchnay', 'phatt', 'quality', 'trendy', 'watch']
1142	AK915HB0RID4SNAFAMZ	Abdullah soomro	258	2016-07-21	4	0	look mai achi hsi lekin bohat naazuk hai thora sa zor du aur toot jaye gi	Positive	['look', 'naazuk', 'toot']
1143	AT571FA0KUZRSNAFAMZ	ms. Farheen	6912	2018-03-28	3	0	mujhe tou yeh band itna khaas nai laga bilkul halki quality ka hai meine jo price pe ki hai usmein itna acha nai laga mujhe bas iss mein light hai jo din mein bhi nazar ajatee hai iske elawa aur kuch pasand nai aya	Positive	['band', 'khaas', 'halki', 'quality', 'light', 'din', 'pasand']
1144	AK915HB0RID4SNAFAMZ	Ms. Ahmed	3411	2018-02-02	3	0	jaisai pictures mein dekhaya tha waisa exactly nai milla aur size bhi chota tha wrist pe hi sirf aati hai aur watch ka dial kuch zyada chota hai mujhe yeh itni mazboot bhi nai laggi	Positive	['pictures', 'size', 'chota', 'wrist', 'watch', 'dial', 'chota']
1145	AK915HB0RID4SNAFAMZ	Ameer Khwaja	722	2018-04-24	3	0	iss se tou itna maza nai aya mujhe meri wife ko pasand tou aya hai lekin iss ki qualityy kaafi halki hai mein isse umeed nai rakhraha ke zyada chal paye yeh ghari tak acha hai lekin barcelet wali quality nai mehsoos hui mujhe	Positive	['maza', 'wife', 'pasand', 'qualityy', 'halki', 'umeed', 'barcelet', 'quality', 'mehsoos']
1146	AK915HB0RID4SNAFAMZ	Maria	3032	2018-12-28	5	0	in economical price its very good very fashionable	Positive	['economical', 'good', 'fashionable']
1147	SO096HB154EYWNAFAMZ	nisha	7000	2016-10-08	5	0	achi heat hai	Positive	['heat']
1148	LO108HB0QBZWGNAFAMZ	Haji Akber	1981	2017-07-10	3	1	color bilkul natural lagta hai mere hair color se sahi se match hua hai aur laganay mein b asan hai lekin mjhe isko lagatay hue bohat dar lagta hai qk spray karne k foran baad yeh bohat ziada heat up krdeta hai bohat hi zada heat mehsoos hoti hai isliye mene isko apply karna chordia hai	Negative	['color', 'natural', 'hair', 'color', 'match', 'asan', 'spray', 'ziada', 'heat', 'heat', 'mehsoos']
1149	RA235HB1JRZE4NAFAMZ	Nabila Uzair	3877	2017-10-06	5	0	zabardust	Positive	['zabardust']
1150	LO108HB0QBZWGNAFAMZ	Laila Alnoor	2716	2017-01-26	4	1	jaldi may usay karne k liye sahi hai lekin yeh bilkul b lasting nahi hai aur isko laganay k baad aap kahin lait nahi skte kyun k yeh pillow pe lag jata hai cover tw theek tarhan se karta hai saray grey hair ko lekin lasting b nahi hai iski aur resistance b aur paison k lehaz se bottle bohat choti hai sirf times usay hoskta hai laganay k baad feel nahi hota k kuch fake laga hua hai yeh baat achi h…	Negative	['jaldi', 'lasting', 'kahin', 'pillow', 'cover', 'grey', 'hair', 'lasting', 'resistance', 'paison', 'lehaz', 'bottle', 'choti', 'feel', 'fake']
1151	LO108HB0QBZWGNAFAMZ	Mishayl Hanan	3172	2017-12-18	4	0	thay hair color spray iss totally effective and this was just according tu what eay hadd expected aas it iss quite easy tu apply and was well explained un thay website aas well thay shade was indeed aas mentioned and it does last aas long aas you du nut wash it out with shampoo aas it iss easy tu remove aas well	Neutral	['hair', 'color', 'spray', 'effective', 'expected', 'easy', 'website', 'shade', 'mentioned', 'long', 'wash', 'shampoo', 'easy', 'remove']
1152	KE347HB0OMOSWNAFAMZ	Muhammad Aashar Maqbool	3487	2016-03-24	4	0	ye trimmer mere bara kaam araha hai kyunkay na sirf mein iss se shave bana leta hon balkay iske baki cutters ki badaulat mein nose hair bhi trim kar leta hon ye perfect cheez hai shaving ke liye	Positive	['bara', 'shave', 'cutters', 'nose', 'hair', 'trim', 'perfect', 'shaving']
1153	GA213HB1FNDE4NAFAMZ	ikram	6670	2019-06-12	5	0	bhot acha hay	Positive	[]
1154	GA213HB1FNDE4NAFAMZ	Zalik Chuhan	6092	2019-02-25	5	0	mujhe yeh facewash bohat acha laga aur mein isko future mein bhi usay karunga	Positive	['facewash', 'future']
1155	GA213HB1FNDE4NAFAMZ	Hamza	2020	2018-09-15	5	1	bht acha item hai usay karni may acha lga	Positive	[]
1156	GA213HB04M4LONAFAMZ	Haris	2064	2016-10-17	5	0	istimaal kiya acha laga kaafi acha face wash hai	Positive	['istimaal', 'face', 'wash']
1157	GA213HB04M4LONAFAMZ	yasir jamil	7432	2018-05-07	5	1	shukriya gift dene ke liay	Positive	['gift']
1158	GA213HB04M4LONAFAMZ	sarah	7166	2018-09-29	5	1	it was good face wash	Positive	['good', 'face', 'wash']
1159	GA213HB04M4LONAFAMZ	Nasir Khan	3956	2017-09-28	5	1	thankyou daraz mujhe complimentary gift dene k liay	Positive	['complimentary', 'gift']
1160	KE347HB1A9R12NAFAMZ	Zeeshan	6135	2017-02-23	5	0	kaafi achi machine hai in this price battery agar kharab beh ho jae toh aram se new bazar se le k change ke la sakti hai	Positive	['machine', 'battery', 'aram', 'new', 'bazar', 'change']
1161	GA213HB0MH4R0NAFAMZ	Vikram	5809	2018-12-08	5	0	quality bht achi hai product ki	Positive	['quality']
1162	GA213HB0MH4R0NAFAMZ	Vikram	5809	2018-12-07	5	0	acha product hai	Positive	[]
1163	GA213HB0MH4R0NAFAMZ	Hassan	2115	2018-11-21	5	1	acha product hai skin k liay	Positive	['skin']
1164	KE347HB0OMOSWNAFAMZ	Rehan Allawala	4450	2018-07-20	4	0	mera hisaab se yeh trimmer set bohat hi lajwab hai aur saray pieces sath mein bohat khoob chalte hain charging ka exactly note nai kia overnight rakhdeta hon aur subah istemaal hojata hi lamba time ke liay qur quality bhi achi hai trimming aur safai ki	Positive	['hisaab', 'set', 'pieces', 'charging', 'note', 'subah', 'lamba', 'time', 'quality', 'trimming', 'safai']
1165	KE347HBELYK4NAFAMZ	saad farooq	7103	2019-08-12	5	0	considering thay price jo details pictures mein dikhaya hai wohi item dia hai trusted seller	Neutral	['details', 'pictures', 'trusted', 'seller']
1166	GA213HB0MH4R0NAFAMZ	Samer Mir	4846	2017-05-16	5	1	mein bohat satisfy ho daraz se	Positive	['satisfy']
1167	GA213HB0MH4R0NAFAMZ	Yasir	5979	2016-06-19	5	1	product bohat achi thi iss ko istimaal se taro tazgi ka ahsas hua skin chanak gayi happy with product	Positive	['istimaal', 'tazgi', 'skin', 'happy']
1168	WA313HB09F2G8NAFAMZ	SaFdar ALi Arain	4612	2017-07-20	5	0	bhot achha beard oil hai quality bhi achhi hai mein roz usay kar raha hon aur meri beard may jahan jahan space thi wahan halki beard nikal rahi mujhe apni beard mein farq mehsoos ho raha really loved thay product wabees smoky istanbul beard oil	Positive	['beard', 'oil', 'quality', 'roz', 'beard', 'space', 'wahan', 'halki', 'beard', 'beard', 'mehsoos', 'loved', 'wabees', 'smoky', 'istanbul', 'beard', 'oil']
1169	KE347HB1A9R12NAFAMZ	Hamza	2020	2018-10-16	5	1	it iss amazing and iss good in this price	Neutral	['amazing', 'good']
1170	KE347HB1A9R12NAFAMZ	mian	6876	2017-02-22	3	0	mere wali machine charge nahi ho rehi lekin baki fit hai new cell per chal jati hai produck good overall	Positive	['machine', 'charge', 'fit', 'new', 'cell', 'good']
1171	KE347HBELYK4NAFAMZ	Mateen Mahmood	3066	2019-03-21	5	0	behtareen cheez hai yeh blades bohat hi achay hain iske aur itnay kaam time may shave hojata hai ab bar bar saloon b nai jana parta charging b iski bohat achi hai aram se aik du din chal jati hai bs charge honay may ziada time leta hai lekin hai bohat acha aur kaam b acha karta hai wo b bohat kaam time mein	Positive	['behtareen', 'blades', 'time', 'shave', 'saloon', 'charging', 'aram', 'din', 'charge', 'ziada', 'time', 'time']
1172	KE347HBELYK4NAFAMZ	Waqas Butt	5894	2018-03-01	4	0	mujhe yeh trimmer pasand aya hai aik baar poori raat chjarge karke yeh bohata cha chalyta hai aur sukoonday trimming hoti hai iss ke zaryay colour bhi mujhe iska pasand aya hai quality se bhi yeh mazboot lagta hai	Positive	['pasand', 'raat', 'chjarge', 'sukoonday', 'trimming', 'colour', 'pasand', 'quality']
1173	KU716OT11H6SWNAFAMZ	Usman	5754	2016-07-05	1	0	fazool product hai treet hygiene ki jaga doosri product bhj date hain	Negative	['fazool', 'doosri', 'date']
1174	KE347HB1LZF4ENAFAMZ	Ali	589	2019-01-28	5	0	achi battery timming hai	Positive	['battery', 'timming']
1175	KE347HBELYK4NAFAMZ	Wahaz Ahmed	5837	2018-09-08	4	0	yaar yeh trimmer hai tou thora chota mere haath ke liay lekin grip achi deta hai aur aik baar full charge karne pe kamaskam minute chalta hai iske blades se mein mutmaeen hon kiunkay bari aramday trimming experience raha hai aur colour bhi iska munsaib hai pehli baar kemei ke sath experience raha aur alhamdullillah abhi tak acha jaaraha hai	Positive	['chota', 'haath', 'grip', 'charge', 'minute', 'chalta', 'blades', 'bari', 'aramday', 'trimming', 'experience', 'colour', 'munsaib', 'experience']
1176	GA213HB0OQKUKNAFAMZ	Shaukat	5140	2019-02-01	5	0	acha hai face k liay bht	Positive	['face']
1177	GA213HB0OQKUKNAFAMZ	Ata ul Munim from Multan	1067	2018-11-23	5	0	acha product hai mein baad mein bhi usay karunga	Positive	[]
1178	GA213HB01ECEENAFAMZ	Ali	589	2017-02-23	5	0	aha hai item usay karne may	Positive	[]
1179	GA213HB01ECEENAFAMZ	Rahul	4341	2019-12-08	5	0	best quality product	Positive	['best', 'quality']
1180	KE347HBELYK4NAFAMZ	Abbas Maniar	157	2019-03-29	1	0	yeh wala trimmer tou kuch zyada hi bekar hai ruk ruk ke chalta hai aur shave banatay waqt tou azab lagta hai qualty se mein bilkul bhi razi nai hon	Negative	['bekar', 'chalta', 'shave', 'waqt', 'qualty']
1181	KE347HBELYK4NAFAMZ	Nauman Pirzada	3972	2017-01-22	4	0	price ke hisaab se acha trimmer hai bassic si looks aur aur design acha hai colour theme bhi achi hai aur mazboot bhi lagraha hai abhi tha	Positive	['hisaab', 'looks', 'design', 'colour', 'theme']
1182	GA213HB0OQKUKNAFAMZ	Irfan	2341	2019-06-08	5	0	mujhe bohat pasand hi yeh brand	Positive	['pasand', 'brand']
1183	PA128HBGDA0RNAFAMZ	WAJID	5822	2017-03-17	5	0	acha h	Neutral	[]
1184	DA155HBGECD5NAFAMZ	Hussain Mehmood	2212	2017-11-08	1	1	bht hay bkwas hai plz koi bhi puchase na kry te reviews fake hai iss mei batteey dalny ki koi jgah nai hai its just aa useless toy soo plz dun t waste your money	Negative	['reviews', 'fake', 'batteey', 'useless', 'waste', 'money']
1185	YM173HB0AR0RGNAFAMZ	Abiha	286	2017-06-25	1	0	koi achi quanlity nhi bs guzara	Negative	['quanlity', 'guzara']
1186	GR362HB0MTLLMNAFAMZ	naila princess	6970	2016-11-08	5	0	haftay tak koi baal nahi aya skin per	Negative	['haftay', 'baal', 'skin']
1187	JO224HB0S8658NAFAMZ	Tahseen Mirza	5514	2018-01-12	3	0	scent tou achi hai liken itni koi long lasting nahi hai price ke hisaab se bus okay hai ye perfume	Negative	['scent', 'long', 'lasting', 'hisaab', 'bus', 'perfume']
1188	GL296HB01CT30NAFAMZ	Bablu	1210	2018-11-06	5	1	great spray hain aik month m hay result mil gya mjhy	Positive	['spray', 'result']
1189	AR654HB1N0H54NAFAMZ	Muhammad	3482	2019-11-23	4	0	lemon ki smell aati ha acha perfume ha maa mil jata ha market se lekin oud aal junaid iss price maa kaafi acha ha iss se	Positive	['smell', 'perfume', 'market']
1190	OU776HB032NB6NAFAMZ	Syed mozim ali Shah	5454	2016-04-24	5	0	nice atur bohot acha atur hain bas dhuk iss baat ka hain mein samjha yeh atur hain lekin nikla alcoholic spray bi thay way good spray maine dobara order keya hain	Positive	['nice', 'alcoholic', 'spray', 'good', 'spray', 'maine', 'order']
1191	OU776HB032NB6NAFAMZ	Waqas	5888	2019-05-13	5	0	awesome fragrance aas eay expected aat time of order placement	Neutral	['awesome', 'fragrance', 'expected', 'time', 'order', 'placement']
1192	CR613HB01Y8WKNAFAMZ	dr fraz	6484	2019-05-16	3	0	bus ok ha yeh yar sahe ny ha	Negative	['bus']
1193	GL296HB01CT30NAFAMZ	Jaffer	2413	2018-05-14	5	1	waqi bohat acha result hai	Positive	['result']
1194	GL296HB01CT30NAFAMZ	Naqeeb	3932	2019-05-10	5	1	really working hard	Neutral	['working', 'hard']
1195	RE274HB09WYZANAFAMZ	Shaheer	5025	2018-07-30	5	0	machar hum se door rehne par majboor	Positive	['door']
1196	CE750HB0H3D4SNAFAMZ	sarfraz	7169	2018-04-22	4	0	baad k sath aati ha kiai b jga le jaany may aasani ha tasweer may bari nazar aati ha zada bari nhi ha lkn work sahi kry ha thnx daraz	Positive	['aasani', 'tasweer', 'bari', 'bari', 'work']
1197	RU054HB13USA8NAFAMZ	Ch.Shafaqat	1348	2017-10-27	1	0	jaldi bhajo mera product	Neutral	['jaldi']
1198	PE159HB06UEI2NAFAMZ	Adv	370	2019-01-13	2	0	work sai kar ri abi tu	Neutral	['work']
1199	VE563HB0AX1TMNAFAMZ	Aliya Durrani	674	2016-02-21	5	1	meri sensitive skin k liay acha nahi hai	Positive	['sensitive', 'skin']
1200	VE563HB0AX1TMNAFAMZ	cookie 94	6460	2016-04-25	5	1	usay karne may ajeeb sa hai product	Negative	['ajeeb']
1201	VE563HB0AX1TMNAFAMZ	Allah Dino	678	2019-02-28	5	1	mein next time bhi usay krungi	Neutral	['time']
1202	VE563HB0AX1TMNAFAMZ	Ayesha Kashif	1141	2020-01-08	5	1	acha brand hai veet	Neutral	['brand']
1203	VE563HB0AX1TMNAFAMZ	Raja Jilani	4353	2019-11-08	5	1	acha tha bht	Positive	[]
1204	VE563HB0AX1TMNAFAMZ	Mehvish Bhatti	3114	2018-03-18	5	1	product sahe hai mgr cell bht jaldi week hojate hn usay karte time	Positive	['cell', 'jaldi', 'week', 'time']
1205	VE563HB0AX1TMNAFAMZ	Sania Bhatti	4882	2019-11-03	5	1	acha item hai	Positive	[]
1206	VE563HB0AX1TMNAFAMZ	Shafaq Rashid	4992	2018-07-18	5	1	bohat acha ehsas hota hai usay karni k baad	Positive	[]
1207	VE563HB0AX1TMNAFAMZ	Laraib elahi	2724	2020-01-14	5	1	mene usay kia tu pasnd aya mje bht	Neutral	[]
1208	VE563HB0AX1TMNAFAMZ	Sana Anees	4869	2017-06-18	5	1	acha hai	Positive	[]
1209	VE563HB0AX1TMNAFAMZ	Mahvish Akbar	2967	2016-09-10	5	1	bht acha tha	Positive	[]
1210	VE563HB0AX1TMNAFAMZ	Mahvish Akbar	2967	2016-05-14	5	1	ye product usay karne may bht acha hai	Positive	[]
1211	VE563HB0AX1TMNAFAMZ	Naima Aslam	3917	2019-01-12	5	1	bht acha laga usay karne may item	Positive	[]
1212	VE563HB0AX1TMNAFAMZ	Kishwar Niazi	2696	2018-04-02	5	1	acha hai item mujhe acha laga bot battery bohat jaldi low ho jati hai	Positive	['bot', 'battery', 'jaldi', 'low']
1213	VE563HB0AX1TMNAFAMZ	Iffat Syed	2254	2018-01-31	5	1	acha hai item	Positive	[]
1214	VE563HB0AX1TMNAFAMZ	Anum mansoor Anum	859	2019-09-11	5	1	acha hai bht	Positive	[]
1215	VE563HB0AX1TMNAFAMZ	Amna Nadeem	775	2016-03-09	5	1	acha hai girls k usay k liay	Positive	[]
1216	VE563HB0AX1TMNAFAMZ	asim mustafa	6372	2018-04-14	5	1	achi product hai	Positive	[]
1217	VE563HB0AX1TMNAFAMZ	Hussain Mehmood	2212	2016-06-30	5	1	acha lga item tu usay karne may	Positive	[]
1218	VE563HB0AX1TMNAFAMZ	sania zulfiqar	7157	2019-02-27	5	1	bht behtareen result tha usay karne k baad	Positive	['behtareen', 'result']
1219	VE563HB0AX1TMNAFAMZ	Dr Rabi	1462	2016-12-18	5	1	acha item hai aur sub se achi baat easy tu usay	Positive	['easy']
1220	RI811HB0SI4BONAFAMZ	Faraz	1693	2017-05-11	3	0	cream tu thk hai par itnay baray jar se nikalti kya hai sirf g jo mushkil se days chalti hai	Negative	['cream', 'baray', 'mushkil', 'days', 'chalti']
1221	RI811HB0SI4BONAFAMZ	Muhammad Junaid	3581	2018-01-27	5	0	mjhe ye product chahiye thi may local market mein gya toh mjhe ny mili lekin daraz par availiable thi mere acne khatam hogyi hai iss se nice productt love u daraz	Positive	['local', 'market', 'khatam', 'nice']
1222	RI811HB0SZ8U4NAFAMZ	Sami	4847	2018-10-09	5	0	rivaj ok spf	Neutral	['']
1223	RI811HB0SZ8U4NAFAMZ	Jaweria	2478	2017-06-17	4	0	very good for winter just ok for summer	Positive	['good', 'summer']
1224	RI811HB0SZ8U4NAFAMZ	Aami	123	2017-09-26	5	0	good product	Positive	['good']
1225	AN961HBEMV78NAFAMZ	Usman Naveed	5769	2019-11-15	5	0	product theak hai mujhe bohat suit kar rha hai	Positive	['suit']
1226	AN961HBEMV78NAFAMZ	Gulraiz Shabbir	1909	2016-02-20	5	0	bohat achi product hai mein satisfied hon	Positive	['satisfied']
1227	AN961HBEMV78NAFAMZ	Saria Lali	4923	2019-11-25	2	0	mujhe acha nahi laga mujhe usk results nahi lagi	Positive	['results']
1228	BI728HB0HCG2INAFAMZ	Ifi Jaan	2256	2018-05-17	5	0	eay like thay result peshawai pathani bana diya	Positive	['result']
1229	GA213HB1NFY0WNAFAMZ	Mrs Kashif	3345	2017-12-19	5	1	cheez achi product hai mene kaam usay kia hai bot acha rha expernce eay will surely usay in future	Positive	['bot', 'future']
1230	GA213HB1NFY0WNAFAMZ	Zeeshan Ameen	6137	2016-11-01	5	1	product pasand aya mujhe	Positive	['pasand']
1231	RI811HB0YXKVWNAFAMZ	Natasha	3964	2016-10-08	5	0	boht hi acha hai	Positive	[]
1232	GA213HB1NFY0WNAFAMZ	Tahira Saeed	5513	2016-03-07	5	1	mainy st time usay kia hai bht acha laga	Positive	['time']
1233	GA213HB1NFY0WNAFAMZ	farooq	6532	2017-09-26	5	1	very nice item good experience	Positive	['nice', 'good', 'experience']
1234	GA213HB1NFY0WNAFAMZ	Asma	1048	2017-11-01	5	1	bohat acha tha mein again lungi	Positive	[]
1235	KE421HB0CZOEANAFAMZ	IllÃ„Â±llÃ„Â±	2281	2017-03-17	5	0	result kaafi acha raha	Positive	['result']
1236	GA213HB1NFY0WNAFAMZ	suaad	7278	2019-04-06	5	1	product bht acha tha skin bht achi ho jati hai usay kar k	Positive	['skin']
1237	GA213HB1NFY0WNAFAMZ	wajiid	7403	2016-11-15	5	1	great experience bht suit karta hai har skin k liye	Positive	['experience', 'suit', 'skin']
1238	GA213HB1NFY0WNAFAMZ	sarwat	7174	2018-10-09	5	1	item bohat pasand aya mujhe	Positive	['pasand']
1239	AN961HBEMV6VNAFAMZ	sania zulfiqar	7157	2016-12-26	5	1	mujhe iss k results jaldi aur bohat achi mili mein stars dungi iss prodct ko	Positive	['results', 'jaldi', 'prodct']
1240	RI811HB1H17G8NAFAMZ	Arsal	925	2018-11-09	4	0	iss price k sath achi cheez h	Positive	[]
1241	GA213HB1NFY0WNAFAMZ	Aisha	535	2016-03-30	5	1	item bohat pasand aya mujhe	Positive	['pasand']
1242	DA155HBFV60KNAFAMZ	I love You Daraz.pk	2226	2016-10-06	5	0	charcoal peel off mask kya kamal hai	Positive	['charcoal', 'peel', 'mask', 'kamal']
1243	ME045HB13R4CSNAFAMZ	Imsaal	2313	2019-10-31	1	0	ye product bilkul b achi ny ti jb ye meri paas pohnchi yo ye tooti hui ti	Negative	['tooti']
1244	HE697HB0DRPKKNAFAMZ	marul	6853	2019-11-20	1	0	meiny yeh b product order kia yeh nhi aya meri paas kiunor paisay le liye	Negative	['order', 'kiunor', 'paisay']
1245	HE697HB0DRPKKNAFAMZ	meh	6867	2017-03-20	2	0	bottle cap was broken and thay scent iss tu strong like overpowering liay	Positive	['bottle', 'broken', 'scent', 'strong', 'overpowering']
1246	KE775HB117MIGNAFAMZ	Naila	3912	2017-11-24	5	0	bohot acha bag hai	Positive	['bag']
1247	KE775HB117MIGNAFAMZ	Mrs Tariq	3351	2018-08-31	4	0	thay bag was really really nice eay only faced aa slight issue regarding delivery bot this bag was just exactly aas eay hadd seen in thay picture soo eay aam satisfied with it thay quality of its material iss really good and thay spaces in every compartment iss very decent enough for storing and keeping cosmetic items and other small item aas well like small jewelry items comb etc it iss very eas…	Neutral	['bag', 'nice', 'faced', 'issue', 'bot', 'bag', 'seen', 'picture', 'satisfied', 'quality', 'material', 'good', 'spaces', 'compartment', 'decent', 'storing', 'cosmetic', 'small', 'small', 'jewelry', 'easy', 'convenience', 'organize', 'stuff', 'compartments', 'easy']
1248	KE775HB117MIGNAFAMZ	Yumna Mazhar	6004	2019-06-23	4	0	mein tou khush hon apne delivered order se jaisa dekha tha jaisa market mein hota hai waisa hi hai quality se bhi satisfied hon aur iska plus point yeh hai ke yeh thora bara hai tou zyada samaan aajata hai	Positive	['khush', 'delivered', 'order', 'dekha', 'market', 'quality', 'satisfied', 'plus', 'bara', 'samaan', '']
1249	SK388HB0HGRUUNAFAMZ	Farhana	1719	2017-01-22	5	0	good fregrence	Positive	['good', 'fregrence']
1250	HE800HB1E7V8ENAFAMZ	Ejaz ali	1534	2019-09-02	1	0	soo baad sokha hwa tha	Neutral	[]
1251	LA938HB0GB4BSNAFAMZ	Guest	1894	2017-08-20	5	0	nice hi apply karni men	Neutral	['nice', 'men']
1252	ZE141HB0Y6ASCNAFAMZ	Guest	1894	2017-09-20	2	0	size itna chota hay ur sarg eye liner mascara bhi nahi hay make tou incomplete hay without mascara	Negative	['size', 'chota', 'liner', 'mascara', 'make', 'incomplete', 'mascara']
1253	MA889HBENIZTNAFAMZ	Anhum Khan	822	2016-09-04	3	0	quality bht kharab hi bht ziada zaya hota hi brush se iss se acha hi banda clazona ke blush le liay yahi volr per quality bht achi	Negative	['quality', 'ziada', 'clazona', 'blush', 'quality']
1254	DA155HBGVE32NAFAMZ	Aashi	142	2017-08-22	5	0	lipsticks itni kaam price may achi hain	Positive	['lipsticks']
1255	WE813EL1ETXQWNAFAMZ	Ms. Lateef	3431	2019-04-16	4	0	apne price ke hisaab se yeh food processor bara hi acha chal raha hai iss ko meine apne puranay phillips ke food processor ke badley mein khareeda hai aur who bohat hi acha chal raha grinders se lekar blenders dry mills aur choppers sab ki service aur performance se mein mutameen hon aur sari accessories se kaam bohat asan hogaya hai	Positive	['hisaab', 'food', 'processor', 'bara', 'puranay', 'food', 'processor', 'grinders', 'blenders', 'dry', 'choppers', 'performance', 'accessories', 'asan']
1256	WE813EL1ETXQWNAFAMZ	Zarak	6102	2019-05-17	1	0	eay order this jumbo food factory twice time bot every time its nut working hay selling soch baad quality product n very disappointed tu may	Neutral	['order', 'food', 'time', 'bot', 'time', 'working', 'soch', 'quality']
1257	BO376HL0R6PE8NAFAMZ	Arshad	941	2019-06-10	4	0	mere order ka pata nhi kaha hay contect with may	Neutral	['order']
1258	PO467HL0F7SHSNAFAMZ	Saeed Ahmed	4701	2018-02-14	4	0	generator acha hai bot noise thori ziyadah hain dosray generators k muqablay may	Neutral	['bot', 'noise', 'thori', 'dosray', 'generators']
1259	PH657HLEMHE9NAFAMZ	Batool Fatima	1240	2019-10-18	4	0	yeh iron bohat achi hai wazan mein bilkul munasib hai aur bohat smooth hai iski soleplate bohat achi quality ki hai garam b jaldi hojati hai yeh aur iss se kapray isitiri b jaldi hotay hain aur bohat achay b hotay hain	Positive	['wazan', 'munasib', 'smooth', 'quality', 'garam', 'jaldi', 'kapray', 'jaldi']
1260	PE715HL06ADTWNAFAMZ	Rashid	4417	2018-11-17	3	0	year compresser warranty hai acha hai g	Positive	['compresser', 'warranty']
1261	SO638EL15HIK4NAFAMZ	Sami	4847	2019-05-25	5	0	hamesha se daraz pk ka sunna hai kabhi azmaa kar nai dekha lekin iss baar ps ka controller order kia aur proper packing mein deliver kia tha mujhe jis se mein bohat khush hua quality bhi achi hai original cheez ab two player gaming ka maza dobala	Positive	['dekha', 'controller', 'order', 'packing', 'deliver', 'khush', 'quality', 'original', 'gaming', 'maza', '']
1262	IN851EL09R6BWNAFAMZ	Controller	1370	2020-01-06	1	0	yar may karachi may hon ur iss ki shop lahore may hay tu iss ko anay may kitne din lagay gen ur charges kia hon gaen plz aap jaldi bata den	Neutral	['din', 'charges', 'jaldi']
1263	ME779EL1FZ8VANAFAMZ	Haneef	2046	2017-06-18	5	0	speed achi h aur mera dslr ka card sahi chal raha h	Positive	['speed', 'dslr', 'card']
1264	SA496OT08HS84NAFAMZ	Najeeb malik	3926	2018-03-13	5	0	boht aala	Positive	[]
1265	SA496OT0TXHEMNAFAMZ	Shakeel	5095	2018-05-01	1	0	bahut hi bakwas product hey din baad harab hogaiee	Negative	['bakwas', 'din']
1266	LO440EL1N1PTGNAFAMZ	Faizan Khan	1667	2016-03-29	5	0	mujhe jo cheez chahiye thi mujhe wohi mili hai ur mera dil khush hogaya kyunkay daraz ki services bhi bohot achi thi jo time mention kara tha us hi time mein deliver hua ur alhamdulillah bohot outclass product hai sabse achi baat mujhe yeh lagi ke ye market se sasta parha mujhe ur mere ghar par bethe bethe agaya sound quality bohot zabardast hai ur earpiece bohot comfortable hai stuffing ki wajah…	Positive	['dil', 'khush', 'services', 'time', 'time', 'deliver', 'alhamdulillah', 'outclass', 'market', 'sasta', 'sound', 'quality', 'zabardast', 'earpiece', 'comfortable', 'stuffing', 'wajah', 'paisay', 'hogaye']
1267	SE836OT0I5XEKNAFAMZ	babar	6402	2017-05-29	3	0	sir jab black friday ki price ye aa rahi hai tu jab hum buy karne ja rahay hain tu waha q aa rahay hain plz tell may	Negative	['black', 'friday', 'buy']
1268	SM845EL1EOFG0NAFAMZ	Shebi	5160	2017-10-10	5	0	ye khrb nai hogi	Negative	['khrb']
1269	SM845EL1EOFG0NAFAMZ	Imtiaz	2314	2017-04-13	1	0	it iss hard and doesnt work well with led tvs led tv blinks	Neutral	['hard', 'work', 'led', 'led', 'tv', 'blinks']
1270	OA551OT11Q9VWNAFAMZ	Hamza	2020	2017-01-09	5	1	yar kamal k price rkhey hai inho ne iss k price k hisaab se iss k range boht kamal hai recommend tu buy in this price	Positive	['kamal', 'hisaab', 'range', 'kamal', 'recommend', 'buy']
1271	MI807EL1IS2VKNAFAMZ	ps4 gamer	7035	2016-03-15	5	0	agar kharab hua tou change ho ga	Neutral	['change']
1272	MI807EL1IS2VKNAFAMZ	Noushad Bhutto	4110	2019-03-04	1	0	doston ye bekaar product hai aur ye itna mehanga hai ke agar aap ko apne pesey barbaad karne hain tu hi ye aap lenge meine bhi ye liya hai yahin se daraz pk se ek tu na ye jail brek hota hai aur na mere paas itnay pesey thay ke mein du ya teen hazar ki iss ki games le sakta hon tu please mere aap sub se ye request hai ke koi bhi iss web se ye product na len meine jub xbox karachi bheja jail brek …	Negative	['bekaar', 'mehanga', 'pesey', 'barbaad', 'pesey', 'teen', 'games', 'web', 'xbox', 'xbox']
1273	OA551OT11Q9VWNAFAMZ	M.Ismail	2832	2016-07-10	4	0	its ok bot mujhe jab mila toota hwa tha baki iss price men ye product achi hai	Positive	['bot', 'toota', 'men', '']
1274	SO638ME1HZ6ZGNAFAMZ	XEedi	5952	2019-12-12	1	0	boht acha console h gaming k liy	Positive	['console', 'gaming']
1275	SO638ME1HZ6ZGNAFAMZ	Fareed	1700	2019-12-24	3	0	boht zabardast console hai	Positive	['zabardast', 'console']
1276	PC881MEEOCOTNAFAMZ	Hasham	2094	2019-07-02	3	0	kya aas ke saat online play karne walay keys hai tu maa buy karo ek bar palay bay mara saat chakar ho chuka hai please replay may	Negative	['online', 'keys', 'buy', 'replay']
1277	LU331EL03JST6NAFAMZ	Rashid	4417	2017-05-24	5	0	bht hi axhy speaker hain bas bi zbrdast h volume tu bht zyada hai aap zaroor lajiya ga ya	Positive	['speaker', 'volume']
1278	TP776OT1H6NZ8NAFAMZ	Hassnain	2138	2018-01-13	1	0	yar discunt ki naam per dhokha hi koi dicunt nen tplink nd market price ruppes hi yahan hzar kh kar disunt di kar duble ki pemint per single di rhi hin daraz pk ka mear kharab ho rha hi iss ka koi haal nkalen	Negative	['discunt', 'naam', 'dicunt', 'market', 'disunt', 'pemint', 'single', 'mear']
1279	HP770ELEMLOLNAFAMZ	haideri	6586	2016-07-11	2	0	page nikalny k baad ink khatam ho gai hadd hoti hi	Negative	['page', 'khatam']
1280	BR674EL0E0EJ8NAFAMZ	Aamir	124	2016-05-11	5	0	high speed printer with pages high yield toner jb men ne printer khareeda us waqt daraz express men tha behtareen tareeqay se pack kar ke bheja gya	Negative	['high', 'speed', 'pages', 'high', 'yield', 'toner', 'men', 'waqt', 'men', 'behtareen', 'tareeqay', 'pack']
1281	HP770OT0Z9HG8NAFAMZ	shamim	7215	2018-01-10	5	0	bht achcha hi labtop hi	Positive	[]
1282	HP770ELEMLOLNAFAMZ	Abdul wahid	215	2016-10-06	5	0	print ki quality achi hay scan aur copy bhi lajawab hay sirf aik chez jo pareshani wali hay wo hay ink cartridge jo bohat menhga hay aur jo cartridge pkg may shaamil hay us se sirf pages hotay hain	Positive	['print', 'quality', 'scan', 'copy', 'lajawab', 'pareshani', 'cartridge', 'cartridge', 'shaamil', 'pages']
1283	LE650OT0Y1BP4NAFAMZ	Junaid	2513	2017-02-18	5	0	jo expect kiya tha us se kahin zeyada acha nikla great experience with daraz keep it up	Positive	['kahin', 'experience']
1284	AL968EL0FT236NAFAMZ	Usman	5754	2019-01-10	1	0	kharab nikla bakwas	Negative	['bakwas']
1285	EL818EL0RIWYYNAFAMZ	Ehtisham	1525	2018-03-20	1	0	full damage hi nut buy this prodect	Neutral	['damage', 'buy', 'prodect']
1286	AL968EL0VN6S2NAFAMZ	Murtaza	3775	2019-08-08	1	0	bakwas ghatiya rd class kisi kaam ka nahi hay	Negative	['bakwas', 'class']
1287	SL817ELENON5NAFAMZ	wajeeh	7401	2016-02-29	4	0	sai h bas kaam chalao	Negative	['chalao']
1288	LG764EL0RFMAQNAFAMZ	sb..n	7177	2019-10-17	5	0	bht maza ayaii abi sound teek hugaii hi q k mein chalati hon sound bar	Positive	['maza', 'sound', 'sound']
1289	LG764EL0RFMAQNAFAMZ	a.s	6211	2016-02-01	5	0	shb speaker iss vry good eay like its tu usay it	Positive	['speaker', 'good']
1290	LU331EL03JST6NAFAMZ	Rashid	4417	2019-12-04	5	0	bht hi axhy speaker hain bas bi zbrdast h volume tu bht zyada hai aap zaroor lajiya ga ya	Positive	['speaker', 'volume']
1291	PA819EL09UBZKNAFAMZ	sunny	7295	2019-08-02	1	0	mazrat ke sath mein na iss product ko buy kya mujhe nd hand camera bhaij diya gya soo mein iss product ko star duga	Neutral	['buy', 'hand', 'camera']
1292	CA681ELENDB6NAFAMZ	m.	6811	2016-05-26	1	0	intahai mehnga cemra day rahen hain orignal price hai ur ye lga kar behten hai	Neutral	['mehnga', 'cemra', 'day', 'orignal']
1293	SO638ELENI4TNAFAMZ	Rasheed	4414	2018-11-15	5	0	good	Positive	['good']
1294	SO638ELENI4TNAFAMZ	Muhammad Junaid	3581	2019-12-01	5	0	mene yeh camera pichle saal daraz se liya excellent packing mein tha aur bahut acha result hai love it	Positive	['camera', 'excellent', 'packing', 'result']
1295	BL373EL1HOS50NAFAMZ	Aamir Khan	126	2016-07-05	5	0	thanks daraz team tu send may soch aa beautiful and powerful base headphone mere paas bohot saaray company k headphones hain ur bohot saaray headphones usay kiye hain par iss jaisay long charging walay headphones mene kabhi nhi dekhe hain bohot hi zabar headphone hay iss liye ghar walay b mujhe headphones k naam pe bulate hain	Negative	['team', 'soch', 'beautiful', 'powerful', 'base', 'headphone', 'headphones', 'headphones', 'long', 'charging', 'headphones', 'headphone', 'headphones', 'naam']
1296	EC810EL022YW0NAFAMZ	Bilal	1273	2018-05-21	2	1	very good led tv rate bhi acha hain	Positive	['good', 'led', 'tv', 'rate']
1297	EC810EL022YW0NAFAMZ	Salahuddin	4769	2018-10-27	5	0	ecostar ka inch ka tv chalne mein tou acha khaasa hai picture ka result zabardast hai hd display ka sahi maza sports channels aur movies mein dekha jata hai aur eco star ne abhi tak naak nai katwaii mein khush	Positive	['inch', 'tv', 'chalne', 'picture', 'result', 'zabardast', 'hd', 'display', 'maza', 'sports', 'channels', 'movies', 'dekha', 'katwaii', 'khush', '']
1298	BO626EL1IBSJ8NAFAMZ	Waseh	5919	2016-05-16	5	0	bay hadh achi cheez hay intihaa e clear sound hay	Positive	['clear', 'sound']
1299	BO626EL1IBSJ8NAFAMZ	Yaxir	5989	2017-11-22	1	0	mujhe aaj hi diliver howa ha abi mein ne usay kar k check nahi kia per packing dekh k hi dil bhot dukha ha mic ka box neechy sy phatta howa ha paouch bhi ander open hi parra howa tha koi plastic coating b nahi tha aisa lag raha ha bheek manga ha	Negative	['check', 'packing', 'dil', 'mic', 'box', 'ander', 'plastic', 'coating']
1300	BO626EL1IBSJ8NAFAMZ	Master TECH	3063	2018-01-20	5	0	friends specially youtubers agar koi isko order karna chahta hay tu karlo because mene bhi buhta baar socha tha order karne se pehlay k pata nhi product original hoga k nhi bot allah ka shukar hay k original nikla seller original product sell karraha he love all	Negative	['order', 'chahta', 'order', 'pehlay', 'original', 'bot', 'allah', 'shukar', 'original', 'seller', 'original', 'sell']
1301	BO626EL1IBSJ8NAFAMZ	Haider Quetta	1972	2019-04-04	5	0	eay was amazed k iss price pe bhi apko boya m orignal mic mil sakta hai baqi jaga pe iski price online se rupay hai per mane chance liya ur order day diya ur jab parcel recieve hua tu her cheez poori ur orignal thi off ker k mobile pe bhi usay horaha hai ur dslr pe bhi bht achi awaz hai thank you inshallah agay bhi whole seller ur daraz pe order duga per plz apni service aisi hay rakhna	Positive	['orignal', 'mic', 'online', 'rupay', 'chance', 'order', 'day', 'parcel', 'orignal', 'horaha', 'dslr', 'awaz', 'seller', 'order', 'rakhna']
1302	BO626EL1IBSJ8NAFAMZ	Bilal	1273	2018-03-10	5	1	bohat achaw microphone hai mehngay walay ki zaroorat nahi best hai ya	Neutral	['microphone', 'mehngay', 'zaroorat', 'best']
1303	BO626EL1IBSJ8NAFAMZ	Nabeel	3856	2017-08-26	5	0	ye mic best hi un doston k liye jo mobile se video shoot karte ya recrding karte hen youtube k liye kamqeemat men aik acha mic hi	Positive	['mic', 'best', 'video', 'recrding', 'youtube', 'kamqeemat', 'men', 'mic', '']
1304	BO626EL1IBSJ8NAFAMZ	Abdul Haseeb Jaranwala	179	2018-05-25	5	0	assalam u alaikum dosto ye mic iss price mein best mic hai iss ki cable ki length m feet hai ek bhai ny pooocha tha iss ki length kitni hai tu mein ny socha kiu na mein zara share kar du	Negative	['mic', 'best', 'mic', 'cable', 'length', 'bhai', 'length', 'kitni']
1305	BO626EL1IBSJ8NAFAMZ	Naeem	3892	2016-06-03	1	0	bohot menga hai bahi	Positive	[]
1306	YM173OT0B7WPKNAFAMZ	Fahman	1626	2018-07-15	1	0	kharab	Neutral	[]
1307	BU884OT0ISTH8NAFAMZ	Shakir	5099	2019-04-25	1	0	bohat hi bekaar quality hai yeh kaam nahi ker raha	Negative	['bekaar', 'quality']
1308	KH996OT0FQNFGNAFAMZ	Narmeen Zia	3938	2019-06-30	5	0	bhot achaha cloth ha bhot pyare ha	Neutral	['cloth']
1309	BL895OT02WHMMNAFAMZ	Zeeshan	6135	2019-01-27	4	0	bus theek hay hai	Positive	['bus']
1310	TO166HL1I7QS0NAFAMZ	ha	6573	2016-03-26	5	0	good bohat kaam ki cheez hai	Positive	['good']
1311	TO166OT0RQ62ONAFAMZ	Syed Asim Akber Shah	5382	2018-08-11	4	0	acha product hai kaafi mjhe iss se koi shikayat nahi quality b munasib hai saray screw drivers bohat kaam atay hain ghar k chotay motay kaam khud karne k liye iski grip b kaafi achi hai aur mein iss product and daraz dono se mutmaeen hon	Positive	['shikayat', 'quality', 'munasib', 'screw', 'drivers', 'chotay', 'motay', 'grip']
1312	TO166OT0RQ62ONAFAMZ	Syed Arshad Ali	5380	2017-11-28	4	0	bohat hi kaam ki cheez hai yeh size mein thora chota hai lekin sath jitne mein screw drivers hain saray alag alag kaam atay hain aur ab bohat si cheezain mein khud hi sahi kar deta hon ghar ki pluck wagera change karna ho ya socket mein koi masla ho ab koi masla nahi hota rubber grip ki waja se aur ziada behtar hai	Negative	['size', 'chota', 'screw', 'drivers', 'cheezain', 'change', 'socket', 'masla', 'masla', 'grip', 'ziada']
1313	IN016HL03NF2CNAFAMZ	Hasan Javed	2088	2017-06-21	4	0	yeh blower bohat acha hai aur istemaal mein roz roz aata hai jab zyada dhool mitti hatani ho ac ke vents aur jaliun mein se nmikalne ke liay yeh acha hai gariun se dhool hataane ke liay bhi aur size bhi iska easily manageable hai asal mein mere garden mein roz mere darakht par se itnay pattay girtay hain ke wo jagah badsurat lagnay lagti hai mein iss blower ke zariye aram se apna garden saaf karl…	Negative	['blower', 'roz', 'roz', 'dhool', 'mitti', 'ac', 'vents', 'jaliun', 'gariun', 'dhool', 'size', 'easily', 'manageable', 'asal', 'garden', 'roz', 'badsurat', 'blower', 'aram', 'garden', 'saaf', 'bijli', 'istimaal', 'aram', 'kahin', 'size', 'chota']
1314	TO166HL1I7QS0NAFAMZ	Arfan	896	2018-09-01	4	0	acha hay	Neutral	[]
1315	TO166HL1I7QS0NAFAMZ	MUHAMMAD NOORUDDIN KHAN	2899	2016-08-24	2	0	maine ye daraz se mangwaya tha kyun ke saddar jane ki himmat nahi horahi thi yar laken iski quality achi nahi thi meine pehlay dinn hi t wala tool usay kara toh uski grip hi toot gayi matlab isi quality hogi cheezon ki toh kun shopping karega daraz se uske ilawa mujhe baki tools ki quality par bhi doubt horaha tha	Negative	['maine', 'quality', 'pehlay', 'grip', 'toot', 'matlab', 'quality', 'cheezon', 'shopping', 'tools', 'quality', 'doubt', 'horaha']
1316	NI613HL000SACNAFAMZ	Ms. Zareen	3442	2017-05-15	5	1	mashaallah bohat achay cutters hain saray ismein gharanya ke istemaal ke liay bohat achay hain commercial ke liay istemaal nai karte bohat hi aasani se yeh cutting karlete hain phal sabzi ke meine agay aur bhi cutters mangwaye hain daraz pk se apne liay aur apni behnoun ke liay bhi kiunkay isne tou wqaqi kitchen mein kaam na tou sirf asan banadia hai lekin ab kaam minutes mien hojata hai phal sab…	Positive	['mashaallah', 'cutters', 'commercial', 'aasani', 'cutting', 'sabzi', 'cutters', 'kitchen', 'asan', 'minutes', 'sabzi', 'paneer', 'chop', 'blade', 'quality', 'sakht', 'sabziyon', 'basaani', 'kaat', 'manpasand', 'sizes', 'blades', 'cutters', 'plastic', 'metal', 'combination', 'pasand', 'asan', 'pack', 'mukhtalif', 'cutters', 'safai', 'asan', 'time', 'kitchen']
1317	IN016HL03NF2CNAFAMZ	Aimen	524	2018-07-09	4	0	yeh blower bohat faidaymand hai aur istemaal mein roz roz aata hai jab zyada dhool mitti hatani ho ac ke vents aur jaliun mein se nmikalne ke liay yeh acha hai gariun se dhool hataane ke liay bhi aur size bhi iska easily manageable hai	Positive	['blower', 'faidaymand', 'roz', 'roz', 'dhool', 'mitti', 'ac', 'vents', 'jaliun', 'gariun', 'dhool', 'size', 'easily', 'manageable', '']
1318	NI613HL000SACNAFAMZ	Qamar Abbas	4220	2019-03-27	5	0	isko jab se ghar pe mangwaya hai kaam pehlay se zyada barh gaya hai iska istemaal tou asan hai lekin iska material aisa nai hai jis pe zyada kaam aasani se hosakay aik du zyada jhatkay laggaye tou yeh tooth jayega aur phir jo kaam hota bhi hai who bhi nia ho payega	Positive	['pehlay', 'asan', 'material', 'aasani', 'jhatkay', 'tooth']
1319	NI613HL000SACNAFAMZ	Aqeel Loon	874	2017-01-22	4	0	boht acha hai aur boht aasani kar deta hai ye kitchen ke kamon ke liye aram se kaat jati hain sabziyan aur phal bhi aur iske blade ki quality boht achi hai aur kaafi shjarp blades hain aur iska plastic bhi mazboot hai aur ye rang mai acha lagta hai boht aur apni marzi se aasani se kaat jati hain sabziyan aur phal aur kitchen ki kaafi zada mehnat kaam hojati hai	Positive	['aasani', 'kitchen', 'kamon', 'aram', 'kaat', 'sabziyan', 'blade', 'quality', 'blades', 'plastic', 'rang', 'aasani', 'kaat', 'sabziyan', 'kitchen']
1320	NI613HL000SACNAFAMZ	...	14	2016-10-01	1	0	nicer hum ne order kia bilkul bakwas hai meterial b theak nhi ur damage tha ur replace b nhi kia abhi tk ur ab cl koi pick nhi karta	Negative	['nicer', 'order', 'bakwas', 'meterial', 'damage', 'replace']
1321	NI613HL000SACNAFAMZ	Haider Shah	1976	2020-01-05	4	0	mein daraz se bohot mutmaeen hon pehli bar kuch mangwaya ur itna acha experience tha ke kia bataun mujhe yaqeen nahi hora ke market se sasti cheez wo bhi mere ghar ke darwazar par yeh nicer dicer bohat hi madadgar hai aur chalne mein iss se behtar cutters iss price mein nai milte thora plastic mazbooti ko maar deta hai lekin mei miski cutting se mutmaeen hon saray blades achi quality ke hain aur …	Positive	['experience', 'yaqeen', 'market', 'sasti', 'nicer', 'dicer', 'madadgar', 'chalne', 'cutters', 'plastic', 'mazbooti', 'cutting', 'blades', 'quality']
1322	NI613HL000SACNAFAMZ	Jazib Ali	2486	2020-01-03	5	0	ye product maine market mein bhi dekha tha ur daraz pk par us se bhi sasta mil raha tha tabhee maine daraz se mangwaya ur ye mere ghar pe deliver kia gaya mere hisaab se toh bohat hi acha hai yeh cutting k saray kamon k liye iski madad se ab mein har tarhan ki vegetables apni pasand ki shape may kaat leti hon iski plastic ki quality b munasib hai aur blades bohat sharp hain isliye mazeed aasani s…	Positive	['maine', 'market', 'dekha', 'sasta', 'maine', 'deliver', 'hisaab', 'cutting', 'kamon', 'madad', 'vegetables', 'pasand', 'shape', 'kaat', 'plastic', 'quality', 'munasib', 'blades', 'sharp', 'aasani', 'kaat']
1323	NI613HL000SACNAFAMZ	Farhana Abdi	1720	2018-10-02	5	1	barhay kaam ki cheez hai yeh sabse pehlay tou mein iske plastic ki quality ki tareef karna chahungi kyunkay jitni zor se isko dabaya jata hai ye agar kharab quality ka hota toh ye foran toot jata iski blades stainless steel ki hain tou bila jhijhak iss se sabziyan kaat sakti hon isko dhona bhi bohot asan hai iske sath alag alag tarah ki blades aati hai alag alag size mein	Negative	['pehlay', 'plastic', 'quality', 'tareef', 'quality', 'toot', 'blades', 'stainless', 'steel', 'sabziyan', 'kaat', 'asan', 'blades', 'size']
1324	NI613HL000SACNAFAMZ	Ms. Khan	3428	2018-07-18	5	1	nicer dicer ki tou wah wah hai dd mein tou bohat khush hon kiunkay iss eid per kaam itna asan hogaya tha kitchen ka jab bhi mehmaan arahay thay chotay motay snacks bananae mein bohat aasani hui thi mein tou bohat khush hon	Positive	['nicer', 'dicer', 'khush', 'asan', 'kitchen', 'chotay', 'motay', 'snacks', 'aasani', 'khush', '']
1325	NI613HL000SACNAFAMZ	Ahsan Raza	503	2019-12-31	4	1	acha product hai nu issues with any thing of it bohat tez chalta hai aur results bhi bohata chay deta hai mient ou khush hon isse aur ghar walay bhi iske mukhtalif blades hi iske highlight hain	Positive	['issues', 'tez', 'chalta', 'results', 'khush', 'mukhtalif', 'blades']
1326	SH687OT1KMP6GNAFAMZ	ALI ZAIDI	84	2016-10-14	1	0	bakwas product hai	Negative	['bakwas']
1327	SH687OT1KMP6GNAFAMZ	Sab4Sab2	4652	2017-08-13	5	0	very nice and soft useful for many purposes	Positive	['nice', 'soft', 'useful']
1328	NI613HL000SACNAFAMZ	Salman Tahir	4813	2018-06-24	5	1	bohat acha haii iss se mera kaam aur b asan ban gya hai iss se cutting slicing sb kaafi jaldi hojata hai maine saray blades usay krliye aur sabne mjhe mutameed kiya hai aaloo b aram se aik hi jhatkay may kaat jata hia chahey slice karna ho ya fries kaatne hon	Positive	['asan', 'ban', 'cutting', 'slicing', 'jaldi', 'maine', 'blades', 'aram', 'jhatkay', 'kaat', 'slice', 'kaatne']
1329	NI613HL000SACNAFAMZ	mr. Rizwan	6903	2017-03-24	4	1	nicer dicer bohat faidaymand nikla ab tou kitchen ke saray kaam aasani se hojate hain aur nicer dicer ke blades bhi itnay tez hain ke sara kaam bohat tez hojata hai quality se bhi mein mutmaeen hoon aur market ke muqablay mein yeh sasta milgaya daraz pk se	Positive	['nicer', 'dicer', 'faidaymand', 'kitchen', 'aasani', 'nicer', 'dicer', 'blades', 'tez', 'tez', 'quality', 'market', 'sasta']
1330	SA427OT1902CGNAFAMZ	Faheem	1620	2017-01-07	1	0	bakwas hai ye size kuch likha hai send kuch ur karti hai ak dam bakwas hai pesy ziya mat kry iss le kar mein ne mangwai hai	Negative	['bakwas', 'size', 'likha', 'bakwas']
1331	CE750HB1N6H1CNAFAMZ	Abdul Saboor	199	2016-07-20	5	0	bari umda cheez hai yar yeh digital weight scale kabhi socha nahi tha k weight scale b glass ka anay lgega iske results bohat accurate hain mene apne pehlay walay analog se compare kar k dekha hai ise aur jo iska sleek design haina wo mjhe sbse ziada pasand aya hai glass ka hai aur itna sleek lagta hai toot jaega weight daalne se dd lekin nahi iska glass kaafi durable hai aur bohat hi aala machin…	Negative	['bari', 'umda', 'digital', 'weight', 'scale', 'weight', 'scale', 'glass', 'results', 'accurate', 'pehlay', 'analog', 'compare', 'dekha', 'sleek', 'design', 'ziada', 'pasand', 'glass', 'sleek', 'toot', 'weight', 'glass', 'durable', 'machinery']
1332	CE750HB1N6H1CNAFAMZ	Kakarzai	2555	2019-07-29	4	0	yeh wali weight machine tou bari khoob hai bohata cha chalti hai aur mere khayal mein har gharane mein aik na aik hona chayiey iss ka wazan bhi na honay ke barabar hai aur delicate bhi hai tou baray sambhal ke istemaal karna parhta hai	Neutral	['weight', 'machine', 'bari', 'chalti', 'khayal', 'wazan', 'delicate', 'baray', 'parhta']
1333	NI613HL000SACNAFAMZ	Sidra Huzaifa	5251	2016-12-06	4	0	iss ne tou kaam asan banadia hai aur ramzan mein bhi isse sehri aur iftari dono aasani se banjatee hain kiunkay zyada wqat aur effort nai lagta blades ki quality mutmaeen hain aur istemaal ke sath sath safai bhi asan hai	Positive	['asan', 'aasani', 'blades', 'quality', 'safai', 'asan']
1334	NI613HL000SACNAFAMZ	Syra	5468	2017-08-08	4	0	nicer dicer kitchen ke kaam ko asan karne ka acha tareeqa nikla blades ki quality bohat achi haii aur tezi mein sara kaam hojata hai ab tou samjhein churri ki zaroorat hi nai parhtee	Positive	['nicer', 'dicer', 'kitchen', 'asan', 'tareeqa', 'blades', 'quality', 'zaroorat']
1335	NI613HL000SACNAFAMZ	Muhammad Usman Khan	3660	2019-05-07	5	0	iss ko marks milte hain lajawab experience raha hai iske sath isko jabb se ghar pe laya hoon kaam tou miutes mein hojata hai aur saray blades ka istemaal itna asan hai kiunkay who baray tez hain aur sabziyon ko bari aasani se kaat letay hain mein tou shukar guzar hon ke achi quality ka mukamal set milla mujhe dd	Positive	['marks', 'lajawab', 'experience', 'blades', 'asan', 'baray', 'tez', 'sabziyon', 'bari', 'aasani', 'kaat', 'shukar', 'quality', 'set']
1336	NI613HL000SACNAFAMZ	Noor	4076	2019-04-03	2	0	m n ye abhi order kia h eay hope jsa picture m dikhaya gya hai same wsa hi deliver ho	Neutral	['order', 'picture', 'deliver']
1337	NI613HL000SACNAFAMZ	Sophia	5312	2017-04-18	4	0	mein jab se nicer dicer ko ghar pe laya hoon mera kaam tou pehlay se zyada asan ba chuka hai iss mein kuch alag alag cutters hain aur un sab ko istemaal kia hai meine aur mein tou razi hon nicer dicer se aisay items ki bohat zaroorat hoti hai kitchen pe jis se kaam bhi asan hojaye aur tez bhi mera kaam tou alhamdullillah asan bangaya hai mein iska shukarguzaar hon	Positive	['nicer', 'dicer', 'pehlay', 'asan', 'cutters', 'nicer', 'dicer', 'aisay', 'zaroorat', 'kitchen', 'asan', 'tez', 'asan', '']
1338	NI613HL000SACNAFAMZ	Rahat	4318	2016-03-08	5	0	bohat hi useful cheez laggi hai yeh mujhe mein tou iski quality se behad khush hon aur iska istemaal bhi bara asan laga mujhe iss ke blades se itni tezi se cutting hojati hai ke ab har cheez ke liay cutting knife nikalna zaroori nai samajhtee	Positive	['useful', 'quality', 'behad', 'khush', 'bara', 'asan', 'blades', 'cutting', 'cutting', 'knife', 'zaroori']
1339	GN272OT06GV84NAFAMZ	Kanwal Shehzad	2578	2018-08-15	2	0	mera daraz ke sath bhot acha experience raha hai ur aaj tak maine jo bhi mangwaya hai who acha nikla hai ur original hota hai laken yeh jo organizer aya hai ye mujhe itna pasand nai aya kyunkay ye bhot low quality ka hai ur iski boundaries mein koi support nahi hai yeh gira rehta bilkul ek kapray ki tarah iss ke borders mein in log ko achay support dena chahiye taakay yeh sahi shape mein rahay	Negative	['experience', 'maine', 'original', 'organizer', 'pasand', 'low', 'quality', 'boundaries', 'support', 'kapray', 'borders', 'log', 'support', 'shape']
1340	NI613HL000SACNAFAMZ	Ahsan Raza	503	2019-01-09	3	1	isko jab se ghar pe mangwaya hai kaam pehlay se zyada barh gaya hai iska istemaal tou asan hai lekin iska material aisa nai hai jis pe zyada kaam aasani se hosakay aik du zyada jhatkay laggaye tou yeh tooth jayega aur phir jo kaam hota bhi hai who bhi nia ho payega	Positive	['pehlay', 'asan', 'material', 'aasani', 'jhatkay', 'tooth']
1341	NI613HL000SACNAFAMZ	Rahmat Ch	4338	2019-03-30	4	0	iss se tou mera kaam bohat taiz hona shuruh hogaya hai iski blades ki sharpness achi khaasi hain tou maza bhi aat hai taizi ka nateeja dekh kar quality mein bhi sahi hai	Positive	['taiz', 'blades', 'sharpness', 'maza', 'taizi', 'nateeja', 'quality', '']
1342	NI613HL000SACNAFAMZ	Zafar	6030	2018-05-06	2	1	nicer dicer ki make se mein khush bilkul bhi nahi hon meine jo stores mein nier dicers dekhe hain wwoohh iss se kaafi behtar hain quality ke hawale se aur chalte bhi behtar hain iss meint ou kuch zyada hi jaan marnee parhtee hai	Positive	['nicer', 'dicer', 'make', 'khush', 'stores', 'quality', 'hawale']
1343	NI613HL000SACNAFAMZ	Hassaan	2112	2019-07-08	1	0	it was delivered broken	Neutral	['delivered', 'broken']
1344	YM173OT0KX0UMNAFAMZ	Aiz	543	2017-04-06	5	0	achi hain choti choti gulu gulu	Positive	['choti', 'choti', 'gulu', 'gulu']
1345	BE446OT0KMSVENAFAMZ	Ahmad	430	2019-02-23	3	0	first of all brand name in mention in middle in very big letters second there iss nu screws pare installed un frame very dificult tu install	Neutral	['brand', 'big', 'letters', 'screws', 'installed', 'frame', 'dificult', 'install']
1346	GN272OT06GV84NAFAMZ	Asifa Rauf	1029	2017-06-15	1	0	ek dum bakwas cheez hai yeh mere paisay zaya hogaye jis tarah ye daraz pe dikhaya gaya hai wesa nahi hai iss mein koi boundary nahi hai jo isko shape mein rakhe ye kapray ke tukre ki tarah parha rehta hai ur andar na honay ke barabar partitions banaye hue hain shoes rakhnay ke liye laken shoes rakhna tu door ki baat hai mein soch rahi hon ke isko kis istimaal mein laun iski boundary mein taaron s…	Negative	['bakwas', 'paisay', 'hogaye', 'boundary', 'shape', 'kapray', 'tukre', 'partitions', 'shoes', 'shoes', 'rakhna', 'door', 'soch', 'istimaal', 'boundary', 'shape', 'fuzool', 'paison']
1347	GN272OT06GV84NAFAMZ	Sabahat Ata	4657	2016-02-22	1	0	although eay keep ordering from daraz bot eay dun t know how this product was even approved tu bay un daraz it iss nothing like it shown in thay picture it iss just aa useless piece of cloth with partitions stitched tu it bot nu support tu keep it in shape eay dont know how someone can place his shoes in this eay cant even think of aa usay of this product thay should make it with supports like fl…	Neutral	['bot', 'approved', 'picture', 'useless', 'piece', 'cloth', 'partitions', 'stitched', 'bot', 'support', 'shape', 'shoes', 'make', 'flexible', 'wire', 'shape', 'useful']
1348	GN272OT06GV84NAFAMZ	Mr. Shoaib	3322	2018-09-01	3	0	this shoe organizer iss just moderately okay eay like thay zip cover feature and that s pretty much it thay canvas bag like fabric doesn t suit thay shape and design of thay product and neither does thay looks eay also didn t find thay size tu bay that good tu fit mi shoes every time eay pull it from underneath mi bed thay shoes get unorganized	Positive	['organizer', 'moderately', 'zip', 'cover', 'feature', 'pretty', 'bag', 'fabric', 'suit', 'shape', 'design', 'looks', 'size', 'good', 'fit', 'mi', 'shoes', 'time', 'pull', 'underneath', 'mi', 'shoes', 'unorganized']
1349	NI613HL000SACNAFAMZ	Waqar Riaz	5883	2016-11-11	3	0	cutting karne mein tou koi masla nahi liken saaf karna bara mushkil hojta hai har jagha sabziyan phans jati hain aur blades ko saaf nahi kia jata	Negative	['cutting', 'masla', 'saaf', 'bara', 'mushkil', 'jagha', 'sabziyan', 'blades', 'saaf', '']
1350	NI613HL000SACNAFAMZ	Vardah Khan	5798	2016-07-04	4	0	yeh tou bohata san hai istemaal karne mein aur kaam bhi bari tezi mein dekhata hai dikhne mein tou abra simple sa hai lekin kaam ke waqt apna maqsad poor karta hai dd	Neutral	['bari', 'dekhata', 'dikhne', 'simple', 'waqt', 'maqsad']
1351	NI613HL000SACNAFAMZ	Tahira Mujeeb	5512	2017-08-19	4	0	meine yeh apni cousin ke liay gift lia tha aur unki taraf se bohat acha response aya hai iske hawale se kehtee hai ke kaam abra asan baandia isne aur har sabzi ke liay aik na aik blade mojood hai	Positive	['gift', 'taraf', 'response', 'hawale', 'asan', 'sabzi', 'blade', 'mojood', '']
1352	NI613HL000SACNAFAMZ	Areej	888	2019-02-16	2	0	meine nai socha tha ke yeh itni jaldi kharab hojayega apne joroun se iska jo mein handle hai wohh tu kaam hi nai karta sahi tarhan se aur sabziyan tou katttee hi nai hain	Negative	['jaldi', 'handle', 'sabziyan']
1353	NI613HL000SACNAFAMZ	Muhammad Noman	3607	2018-01-13	5	0	acha kaam kar raha hai mujhe kisi kisam ko issue nahi aya mein aasani se tarha tarha ki vegies kaat leti houn	Positive	['issue', 'aasani', 'kaat']
1354	NI613HL000SACNAFAMZ	Sehrish Majeed	4967	2018-04-26	4	0	thay nicer dicer has really helped aa lot now thay burden of cutting veggies and fruits tu thay precise size has been reduced all thanks tu thay in different cutters and blades that make work soo effervescent also thay make iss good too eay like how eay aam able tu handle it firmly	Neutral	['nicer', 'dicer', 'burden', 'cutting', 'fruits', 'precise', 'size', 'reduced', 'cutters', 'blades', 'make', 'work', 'effervescent', 'make', 'good', 'handle']
1355	GN272OT06GV84NAFAMZ	Sabera Hussain	4663	2018-02-24	3	0	aisa bilkul nahi hai jesa picture may dikh raha hai yeh itna mazboot aur sturdy nahi hai bilkul kapray ka bana hua hai aur iss tarhan shoes iss mein nahi rehte jese dikh rhe hain haan mene shoes ko box samait rkhdia hai tw yeh kuch iss shape may aya hai aur easily bed k neechay rkhdia iske borders pe koi support honi chahiye taakay yeh stable rahay apni shape sahi se maintain rkhey	Negative	['picture', 'kapray', 'shoes', 'shoes', 'box', 'shape', 'easily', 'neechay', 'borders', 'support', 'stable', 'shape', 'maintain']
1356	GN272OT06GV84NAFAMZ	Sidra	5247	2017-11-16	3	0	thay product was delivered in nu time efficient delivery thay quality of thay product was ok it really worth nut more than this	Neutral	['delivered', 'time', 'efficient', 'quality', 'worth']
1357	GN272OT06GV84NAFAMZ	Imran Ali	2289	2019-10-31	3	0	jesa isse picture may dikhaya gaya hai yeh bilkul b aisa nahi hai bohat hi halkay material ka bana hua hai aur support k liye iss may koi hard cheez usay nahi ki gai jo isse iss shape may rehne k qabil banaye sirf us soorat mein yeh istemaal k qabil hai agar shoes aur slippers ko dabbay samait iss may rakha jaye warna yeh bilkul b alag alag shoes iss tarhan nai kar pata jesa humein picture may di…	Negative	['picture', 'material', 'support', 'hard', 'shape', 'qabil', 'qabil', 'shoes', 'slippers', 'dabbay', 'shoes', 'picture', 'dividers', 'shape', 'laiq', 'behtareen']
1358	NI613HL000SACNAFAMZ	Rimsha Noman	4483	2018-05-03	4	0	mein nicer dicer ke result se bohat khush hon isko isteal karna behad asan aur iska kaam bhi behad taiz blades ki quality bhi baria chee lagi muhee	Positive	['nicer', 'dicer', 'result', 'khush', 'behad', 'asan', 'behad', 'taiz', 'blades', 'quality', '']
1359	GN272OT06GV84NAFAMZ	Muhammad Danish	3544	2016-12-13	3	0	ye kaam mein tou araha hai filhal liken quality ko dekhte huye mujhe nahi lagta ziayda chalna hai iss ne abhi se ek side se iska handle phatt raha hai tou mere hisaab se agar iski quality achi hoti tou ye bohat hay aala cheez hoti	Positive	['quality', 'side', 'handle', 'phatt', 'hisaab', 'quality']
1360	TE487OT0FNK8YNAFAMZ	Honey	2178	2017-01-27	3	0	jo cushions rcv huwe un k designs totlay change thay aur bilkul bhi achay nh thay iss lye return karwa diye jo pics show kar rahay hn wohe designs bhejnay bhi chahye ya option dena chahye k design select kiya ja sakay shukria	Positive	['cushions', 'designs', 'totlay', 'change', 'return', 'karwa', 'pics', 'show', 'designs', 'option', 'design', 'select']
1361	BW237HL0R5CMONAFAMZ	FAISAL	1580	2019-04-13	1	0	bohat halkay material ki ha men ne paisay zaya kar diye ye le kar baki aap logon ki marzi hi	Negative	['material', 'men', 'paisay', 'logon']
1362	BW237HL0R5CMONAFAMZ	Usman	5754	2017-03-11	1	0	bohat halka matreial hai dil khuah ny howa le kar noon stik bi eay hay hai nishaan par gi jb halka sa chamach chalaya	Negative	['halka', 'matreial', 'dil', 'nishaan', 'halka', 'chamach']
1363	NA605HL0VF1BWNAFAMZ	Ali	589	2017-04-24	3	0	bs saii hai jo dikhaya hai wo nai hai per guzare laik theek hai	Positive	[]
1364	NA605HL0VF1BWNAFAMZ	Hanzalah Amjad	2057	2019-02-17	2	0	bakwas hi dikhathy aik hain ur bhaijty totally different chez	Negative	['bakwas']
1365	SO723HL0K5YXINAFAMZ	Amara talha	708	2019-02-13	5	0	boht achi prodect ha great exprince	Positive	['prodect']
1366	HO632HL0IOUT4NAFAMZ	Asif Siddique	1025	2019-03-26	4	0	nice product kitchen ke liye achi cheez hai	Positive	['nice', 'kitchen']
1367	FO602HL1KVYO0NAFAMZ	shahida	7199	2017-06-23	5	0	iss price may acha hay	Neutral	[]
1368	CO619HL02C3A8NAFAMZ	Saad Wahab	4641	2017-11-22	4	0	bohat khoob bohat pasand aye mujhe yeh shelves behtareen design hai aur quality mein bhi bohat achay mein daraz pk ka shukar guzaar hon ke yeh cheez sahi salamat paunchee	Positive	['pasand', 'shelves', 'behtareen', 'design', 'quality', 'shukar']
1369	TH065EL19ZT5GNAFAMZ	Uroosa	5737	2017-04-25	5	0	bohot zabardast	Positive	['zabardast']
1370	TH065EL19ZT5GNAFAMZ	Sohaib	5292	2018-04-05	3	0	normal hai	Neutral	['normal']
1371	TH065EL19ZT5GNAFAMZ	Mian	3125	2018-08-22	5	0	boht hi acha ha ur usay karni maa bhi asan ha	Positive	['asan']
1372	TH065EL19ZT5GNAFAMZ	Abdul rauf	214	2019-07-04	4	0	bahut acha aur vahot kaam keemat par bahut zabardast hay thank you delar and daraz	Positive	['keemat', 'zabardast']
1373	TH065EL19ZT5GNAFAMZ	Farooq alvi	1742	2019-06-29	4	0	kaafi sahi laga mijhay ye cheezquality iss ki theek haiistamaal karne may b hi kaafi sahi laga mijhay aur jis kaam k liay maine lea tha wo bhi sahi hojata hai mutmain hon bilkul iss se mai	Positive	['cheezquality', 'haiistamaal', 'maine', 'mutmain']
1374	TH065EL19ZT5GNAFAMZ	Manshad Iqbal	3021	2016-07-13	1	0	mein pehlay bhi daraz se chizen mangwata raha hon laken aaj tak itni fuzool cheez nai deliver hui mjhe matlab ye product dikhne mein tou sahi hai ur damage nahi hai kahin se laken kia faida isse product ka jisko aap istimaal nahi kar saktay iski blades bohot bakwas hain kuch bhi chop nahi hota bohot force lagani parhtee hai ur adhi chizen tou atak jati hain iss mein jab mein purpose iska pura nah…	Negative	['pehlay', 'chizen', 'fuzool', 'deliver', 'matlab', 'dikhne', 'damage', 'kahin', 'faida', 'istimaal', 'blades', 'bakwas', 'chop', 'force', 'adhi', 'chizen', 'atak', 'horaha', 'faida']
1375	TH065EL19ZT5GNAFAMZ	Iqra Umair	2337	2016-03-09	3	0	theek tha itna kuch istemaal nai kia lekin mein satisfied hon isse iska masla yeh hai aky iske blades ka size sahi nahin bari sabziyan yeh nahin kaat sakta aur mujhy usi ke liay chayiey tha	Negative	['satisfied', 'masla', 'blades', 'size', 'bari', 'sabziyan', 'kaat']
1376	TH065EL19ZT5GNAFAMZ	aqib	6339	2016-03-07	2	0	lajawab experience hota agar sara samaan theek hota lekin saray baldes achi quality ke nahin hain aik du tou haath mein agaye thay jab istemaal karraha tha shukar hai koi physical damage nai hua	Positive	['lajawab', 'experience', 'samaan', 'baldes', 'quality', 'haath', 'shukar', 'physical', 'damage']
1377	TH065EL19ZT5GNAFAMZ	Saba Aslam	4654	2017-09-19	4	0	maine hamesha daraz se jo bhi cheez mangwai hai woh bohot achi nikli hai ur yeh bhi un mein se ek hai nicer dicer bari keemtee cheez nikli hai isko istemaal karne se tou kaam jhat jhat se hojata hai aur sabziyon se lekar phal aur bhi mukhtalif chizin jaisay paneer bhi isse cut jata hai bohat saray blades hain ismein sab aala mayar quality kay tou ghar pe jab istemaal horaha hota hai tou kaam tezi…	Positive	['maine', 'nicer', 'dicer', 'bari', 'keemtee', 'sabziyon', 'mukhtalif', 'paneer', 'cut', 'blades', 'mayar', 'quality', 'horaha', 'basaani']
1378	TH065EL19ZT5GNAFAMZ	Mrs. Amer Riaz	3380	2016-09-02	3	0	yehi cheez maine market mein dekhi thi laken jana nahi ho paaya ur ittifaq se mujhe ye daraz pk par nazar agai kaam price mein toh maine mangwa liay hai iss ki blades inhon ne itni sharp nahi banai aksar products mein mujhe kaafi zor lagana parh jata hai ur kuch tu atak jati hain toh phir blade nikal kar inhe nikalna parta hai ur dosra ke barhi sabziyon ke iss ke size ka kaatna parta hai laken ye…	Negative	['maine', 'market', 'paaya', 'maine', 'blades', 'sharp', 'aksar', 'products', 'atak', 'blade', 'sabziyon', 'size', 'kaatna', 'sabziyon', 'shape', 'size', 'kaat', 'asan', 'bus', 'blades', 'thori', 'tezz']
1379	TH065EL19ZT5GNAFAMZ	Nabeel Ahmad	3857	2017-11-18	5	1	masha allah yeh bohat hi acha hai aur mein iske kaam aur iske material dono se hi bohat satisfied hon sbzian aur phall kaatne mein ab mjhe koi masla nahi hota aur khudhi apni marzi se apne liye salad b bana leta hon dicing slicing sb iss se asan banadia hai	Positive	['allah', 'material', 'satisfied', 'kaatne', 'masla', 'salad', 'dicing', 'slicing', 'asan']
1380	TH065EL19ZT5GNAFAMZ	Tayyab Hussain	5591	2018-03-26	3	0	dikhne mein tou itna acha hai yeh lekin chalatay waqt tou bilkul bhi maza nai aya choti sabziyabn aram se cut hojati hain lekin bari wali bohat mushkiloun se chiop hoti hain kiunkay iske blade bari size ki sabziyon ko support nai karte agar apko thori si bhi lambi sabzi kaatni hou toh apko uske pehlay apni knife se hisson mein karna hoga toh yeh iski blades ke size ka hojayega meine jaisa parha t…	Negative	['dikhne', 'chalatay', 'waqt', 'maza', 'choti', 'aram', 'cut', 'bari', 'blade', 'bari', 'size', 'sabziyon', 'support', 'thori', 'lambi', 'sabzi', 'pehlay', 'knife', 'blades', 'size', 'experience', 'khush']
1381	TH065EL19ZT5GNAFAMZ	Mr. Farooq	3305	2017-03-11	4	0	acha product ahi yeh nicer dicer ghar peh bohat kaam aata hai jab se lia hai saray blades ki quality se mein bohat khush hon basaani cutting krdeta hai aur accurate bhi na ke salad bohat achay banay fruit chaat bhi bohat easily ban jati hai aur in blades ko saaf karna aur bhi asan hai	Positive	['nicer', 'dicer', 'blades', 'quality', 'khush', 'basaani', 'cutting', 'accurate', 'salad', 'easily', 'ban', 'blades', 'saaf', 'asan']
1382	TH065EL19ZT5GNAFAMZ	Attia Imtiaz	1094	2017-10-21	5	0	iss se behtareen cheez mjhe ab tak nahi mili apne kitchen k liye yeh zbrdst tareeqay se sari vegetables kaat deta hai wo b bgher time liye bohat hi acha laga mjhe yeh iske saray blades usay krliye sab bohat sharp aur kaam k hain dicing slicing grating sb karti hon iss se iski quality b bohat achi hai y	Positive	['behtareen', 'kitchen', 'zbrdst', 'tareeqay', 'vegetables', 'kaat', 'time', 'blades', 'sharp', 'dicing', 'slicing', 'quality']
1383	TH065EL19ZT5GNAFAMZ	Faizan Bardai	1664	2016-09-25	4	0	bohat hi acha hai yeh cutting k saray kamon k liye iski madad se ab mein har tarhan ki vegetables apni pasand ki shape may kaat leti hon iski plastic ki quality b munasib hai aur blades bohat sharp hain isliye mazeed aasani se kaat jati hain sabzian and phal	Positive	['cutting', 'kamon', 'madad', 'vegetables', 'pasand', 'shape', 'kaat', 'plastic', 'quality', 'munasib', 'blades', 'sharp', 'aasani', 'kaat']
1384	TH065EL19ZT5GNAFAMZ	Sajjad Ali	4763	2019-05-15	5	1	zabardast cheez hai yaar sabzi kaatna itna asan nahi tha pehlay jitna ab hogya hai iss se bohat hi behtareen quality k taiz blades hain iske aur plastic ki quality b bohat achi hai usay karne may asan hai aur acha b hai ab sabzi phal kaatna behad asan hai chahey slicing karna ho dicing ya grating saray k blades iske zbrdst hain	Positive	['zabardast', 'sabzi', 'kaatna', 'asan', 'pehlay', 'behtareen', 'quality', 'taiz', 'blades', 'plastic', 'quality', 'asan', 'sabzi', 'kaatna', 'behad', 'asan', 'slicing', 'dicing', 'blades', 'zbrdst']
1385	TH065EL19ZT5GNAFAMZ	Wajeeha Siddiqui	5851	2017-10-11	4	1	its aan absolutely amazing tool all thay blades of it are soo useful and has maday cutting easier it cuts in seconds without any problem eay wasn t expecting soch good plastic quality bot its solidly built and seems durable blades are maday of good quality stainless steel and are soo sharp cuts every vegetable and fruit in seconds it cuts finely	Positive	['absolutely', 'amazing', 'blades', 'useful', 'maday', 'cutting', 'easier', 'cuts', 'seconds', 'problem', 'soch', 'good', 'plastic', 'quality', 'bot', 'solidly', 'built', 'durable', 'blades', 'maday', 'good', 'quality', 'stainless', 'steel', 'sharp', 'cuts', 'seconds', 'cuts']
1386	TH065EL19ZT5GNAFAMZ	Mr. Javaid	3308	2017-11-02	5	1	mashaallah mera nicer dicer ke sath expereince hobat acha raha hai isko jab bhi istemaal kia hai churri ki zaroort hi nai parhtee bohat si different fruits aur vegetables ba aasani chop hojate hain who bhi symeetrical shape mein tou presentation dete waqt bohat ehmiat rakhtee hain yeh isko istemaal karne ke baad iski safai aur maintenence bhi bohat asan	Positive	['mashaallah', 'nicer', 'dicer', 'fruits', 'vegetables', 'aasani', 'chop', 'shape', 'presentation', 'waqt', 'ehmiat', 'safai', 'maintenence', 'asan']
1387	TH065EL19ZT5GNAFAMZ	Ms. Hadia	3420	2018-02-18	3	0	this nicer dicer iss nut aas good aas eay thought it would bay though everything in thay box iss working really well its just that thay mein container has aa damaged edge which doesn t look good one bit like someone dented thay side with aa small hammer all thay blades are working really well and are doing their jobs nicely bot that crack iss just reassuring mi doubts of thay quality of thay nice…	Neutral	['nicer', 'dicer', 'good', 'everything', 'box', 'working', 'container', 'damaged', 'edge', 'look', 'good', 'dented', 'side', 'small', 'hammer', 'blades', 'working', 'bot', 'crack', 'mi', 'quality', 'nicer', 'dicer', 'effective', 'long', 'run']
1388	TH065EL19ZT5GNAFAMZ	Ms. Hareem	3422	2018-11-05	4	1	abhi tak jitna bhi nicer dicer ko istemaal kia hai bara aramday experience raha hai mera na tou mujhe iski quality se koi shikayat hai aur na hi iski price se iss price mein jo cheez milli hai who bohat achi hai aur iss ne mera adhay se zyada kaam hi asan kardia hai sabziya ya phal kaatna bohat asan bangaya hai aur well presented salads banana bhi youtube videos dekh kar seekha hai	Positive	['nicer', 'dicer', 'bara', 'aramday', 'experience', 'quality', 'shikayat', 'asan', 'kaatna', 'asan', 'presented', 'banana', 'youtube', 'videos']
1389	TH065EL19ZT5GNAFAMZ	Zabardast	6027	2017-01-11	4	1	hai tou yeh bari kamal kki cheez jab bhi istemaal ki hai mein tou bohat satisfied raha hon bas thora sa plastic ki quality se mujhe shikayat hai ke lagta bara halka hai lekin blades ki quality aur blades ke istaml ki aasani ki waja se mujhe yeh bara pasand aya aur kama ko isne pehlay se zyada asan aur fun banadia hai	Positive	['bari', 'kamal', 'satisfied', 'plastic', 'quality', 'shikayat', 'bara', 'halka', 'blades', 'quality', 'blades', 'aasani', 'bara', 'pasand', 'pehlay', 'asan', 'fun', '']
1390	TH065EL19ZT5GNAFAMZ	Zafar Iqbal	6032	2016-07-21	5	1	behtreeen cheez hai yeh nicer dicer jab se mangaya hai ab meri wife rozana salad banati hai qk iss se kaatna bohat hi asan hai aur ziada waqt b nai lagta iss se aur itni perfect sbzian kaat jati hai jese b shape ki chahain plastic b kaafi durable hai aur blades shadeed sharp hain aram se aloo saib sab aik hi jhatkay may kaat jata hai	Positive	['behtreeen', 'nicer', 'dicer', 'wife', 'rozana', 'salad', 'kaatna', 'asan', 'ziada', 'waqt', 'perfect', 'kaat', 'shape', 'plastic', 'durable', 'blades', 'sharp', 'aram', 'jhatkay', 'kaat']
1391	TH065EL19ZT5GNAFAMZ	Muhummed Khawer	3720	2019-12-16	5	1	nicer dicer bari keemtee cheez nikli hai isko istemaal karne se tou kaam jhat jhat se hojata hai aur sabziyon se lekar phal aur bhi mukhtalif chizin jaisay paneer bhi isse cut jata hai bohat saray blades hain ismein sab aala mayar quality kay tou ghar pe jab istemaal horaha hota hai tou kaam tezi aur basaani hojata hai	Positive	['nicer', 'dicer', 'bari', 'keemtee', 'sabziyon', 'mukhtalif', 'paneer', 'cut', 'blades', 'mayar', 'quality', 'horaha', 'basaani']
1392	TH065EL19ZT5GNAFAMZ	Shahid	5030	2017-01-10	5	0	zindgi asan	Positive	['asan']
1393	TH065EL19ZT5GNAFAMZ	Imtiaz Khurshid	2318	2016-04-02	3	0	dikhne mein tou itna acha hai yeh lekin chalatay waqt tou bilkul bhi maza nai aya choti sabziyabn aram se cut hojati hain lekin bari wali bohat mushkiloun se chiop hoti hain kiunkay iske blade bari size ki sabziyon ko support nai karte meine jaisa parha tha waisa experience mujhe nai milla tou mein itna khush nai hon	Positive	['dikhne', 'chalatay', 'waqt', 'maza', 'choti', 'aram', 'cut', 'bari', 'blade', 'bari', 'size', 'sabziyon', 'support', 'experience', 'khush']
1394	TH065EL19ZT5GNAFAMZ	Noor illahi	4082	2016-08-23	4	0	nicer dicer ko jab se ghar pe laya hoon meine isko istemaal roz hi kia hai aur mein tou mutmaeen honn result se dikhne mein nicer dicer bohat acha hai lekin plastic ki body se mein itna khush nai hon kiunkay iski life lambi nai lagti jab tak chal raha hai chala raha hoon lekin yeh baat hai ke isne kaam ko mazeed asan bana dia hai	Positive	['nicer', 'dicer', 'roz', 'result', 'dikhne', 'nicer', 'dicer', 'plastic', 'body', 'khush', 'lambi', 'asan', '']
1395	TH065EL19ZT5GNAFAMZ	Sajjad Ahmed	4762	2019-05-04	5	0	nicer dicer ny meri wife k leye kitchen k kaam asan kar deye hain quality boht achi hi	Positive	['nicer', 'dicer', 'wife', 'kitchen', 'asan', 'quality']
1396	TH065EL19ZT5GNAFAMZ	mr. Imran	6901	2018-11-16	4	1	bawarchikhanay ke kaam ke liay yeh nicer dicer bohat umda hai aur bohat amdad bhi karta hai iusko jab se laya hoon begum ne iska khoob istemaal kia hai kehtee hai ke asan bhi hai aur tez bhi agar who khush hai kaam se tou mein bhi	Positive	['nicer', 'dicer', 'umda', 'asan', 'tez', 'khush', '']
1397	TH065EL19ZT5GNAFAMZ	Binte Fatima	1303	2018-03-09	5	1	bohat khoob yeh nicer dicer bohat hi madadgar hai aur chalne mein iss se behtar cutters iss price mein nai milte thora plastic mazbooti ko maar deta hai lekin mei miski cutting se mutmaeen hon saray blades achi quality ke hain aur baasni kaam hojata hai	Positive	['nicer', 'dicer', 'madadgar', 'chalne', 'cutters', 'plastic', 'mazbooti', 'cutting', 'blades', 'quality']
1398	TH065EL19ZT5GNAFAMZ	Mahnoor	2959	2018-06-12	5	0	nicer dicer behtareen hai kitchen ke kamoun ko asan aur mazedar banati hai iske saray blades se mein mutmaeen hon kiunkay yeh kaam bhi tez karte hain aur chalte bhi bohat aasani se hain plastic ki body hai tou grip achi aati hai jab istemaal karein aur salad bananay ke liay yeh har sabzi aur phal ko aik jaisay pieces mein kaatee hai	Positive	['nicer', 'dicer', 'behtareen', 'kitchen', 'asan', 'mazedar', 'blades', 'tez', 'aasani', 'plastic', 'body', 'grip', 'salad', 'bananay', 'sabzi', 'pieces', '']
[truncated: 2,524 more rows]
