# Supplementary material for: Spammer group detection and diversification of customers’ reviews
Source: PeerJ Comput Sci. 2021 Apr 9;7:e472. doi: 10.7717/peerj-cs.472 (PMC8049124; doi:10.7717/peerj-cs.472)
Supplement: Supplemental Information 2 — The Yelp reviews (spam and non-spam) with sentiments (positive, negative, and neutral) and review features. The complete dataset is available at Kaggle: Naveed Hussain, “Yelp Review with Sentiments and Features.” Kaggle, 2021, doi: 10.34740/KAGGLE/DSV/1898501. [file peerj-cs-07-472-s002.xlsx]

## Sheet: Sheet1
User_id	Product_id	Rating	Date	Review	Spam(1) and Not Spam(0)	Sentiment	Features
923	0	3	41669	The food at snack is a selection of popular Greek dishes. The appetizer tray is good as is the Greek salad. We were underwhelmed with the main courses. There are 4-5 tables here so it's sometimes hard to get seated.	1	Positive	['appetizer tray', 'greek salad', 'main courses']
924	0	3	40668	This little place in Soho is wonderful. I had a lamb sandwich and a glass of wine. The price shocked me for how small the serving was, but then again, this is Soho. The staff can be a little snotty and rude, but the food is great, just don't expect world-class service.	1	Positive	['little place', 'soho', 'lamb sandwich', 'soho', 'world-class service']
925	0	4	40907	ordered lunch for 15 from Snack last Friday. Ã‚Â On time, nothing missing and the food was great. Ã‚Â I have added it to the regular company lunch list, as everyone enjoyed their meal.	1	Positive	['snack', 'regular company lunch list']
926	0	4	41186	This is a beautiful quaint little restaurant on a pretty street. Ã‚Â If you're strolling through soho around lunchtime, this would be a great place to stop for a bite. I heard the reviews about the lamb sandwich, so I had to try it. I'm very happy that i did. Every single ingredient - from the bread to the onions and tomatoes, the lamb and the sauce - was delicious. These four stars are well dese…	1	Positive	['beautiful quaint', 'pretty street', 'great place', 'lamb sandwich', 'tasty sandwich', 'great ambiance']
927	0	4	41676	Snack is great place for a Ã‚Â casual sit down lunch- especially on a cold winter day. Ã‚Â In many ways the restaurant mirrors the food- simple yet unique. Ã‚Â The avgolemono soup was lemony perfection and the butter bean salad hearty yet light. Ã‚Â The greek coffee is different...they sweeten it with honey which makes for an interesting thickness and sweet spice. I definitely plan on going back …	1	Positive	['snack', 'great place', 'Ã¢ casual', 'cold winter day', 'restaurant mirrors', 'avgolemono soup', 'lemony perfection', 'butter bean salad', 'greek coffee', 'different ...', 'interesting thickness', 'small space', "n't suit", 'sister restaurant', 'snack taverna']
928	0	4	41261	A solid 4 stars for this greek food spot. Ã‚Â If you're a fan of lamb like I am, you must come here and try the lamb sandwich. Ã‚Â Amazingly tender and juicy with onions and arugula. Ã‚Â Also had a good greek salad.	1	Positive	['greek food spot', 'lamb sandwich', 'amazingly', 'good greek salad']
929	0	4	41051	Let me start with a shout-out to everyone who is boosting the mint lemonade. That stuff is super tasty. Ã‚Â I refuse to believe you can get fresher, more delicious Greek food for your dollar. Ã‚Â I sport the lunch here regularly: huge sandwiches filled with marinated vegetables or succulent meats (the lamb is particularly choice) on a floury ciabatta with an ideal crust-crunch to soft-inner-womb.…	1	Positive	['mint lemonade', 'super tasty', 'greek food', 'huge sandwiches', 'succulent meats', 'floury ciabatta', 'ideal crust-crunch', 'cold meze options', 'good feta', 'olive oil', 'heaven']
930	0	4	41102	Love this place! Ã‚Â Try the Chicken sandwich or the Roasted Chicken. Ã‚Â Those are winners every time. Ã‚Â Really delicious and worth the wait.	1	Positive	['love', 'try', 'chicken sandwich', 'roasted', 'really']
931	0	4	41134	My friend and I were intrigued by the nightly entree special, "Little Shoes," (eggplant stuffed with ground sirloin), and so we decided to eat at Snack. Although very tiny, we were able to stand while we waited and have a glass of wine at the narrow 'bar.' I absolutely loved the atmosphere, but I was a bit disappointed to find out that they were out of the entree special by the time we sat down. …	1	Positive	['little shoes', 'ground sirloin', 'snack', "narrow 'bar", 'substitute entree', 'veg', 'moussaka', 'green pepper plate']
932	0	5	40978	Stopped in for lunch today and couldn't believe how delicious everything was! My boyfriend and I shared an avgolemono soup, lamb sandwich, spanakoptikia and baklava. Everything came out super quickly and far exceeded our expectations. Ã‚Â The service was wonderful too! We will definitely be back!	1	Positive	['stopped', 'avgolemono soup', 'lamb sandwich']
933	0	5	41138	pretty cool place...good food...good people	1	Positive	['pretty cool place ... good food ... good people']
934	0	5	41111	all around good place, cozy, I came in and didn't have a huge appetite but just stuck to the appetizers...which my friend and I did the combo platter of and we were more than full with it.	1	Positive	['good place', 'huge appetite', 'appetizers ...', 'combo platter']
935	0	5	41671	Fabulous Authentic Greek Food!!! This little spot is bold with great flavors. Knowledgable host that describes the layers of a food like you were sitting in the kitchen watching the preparation. If you are a true foodie you don't want to miss Snack!	1	Positive	['fabulous authentic', 'little spot', 'great flavors', 'knowledgable host', 'true foodie', 'snack']
936	0	5	40604	Perfection. Ã‚Â Snack has become my favorite late lunch/early dinner spot. Ã‚Â Make sure to try the butter beans!!!	1	Positive	['perfection', 'snack', 'dinner spot', 'butter beans']
937	0	4	40872	Tiny little place, but very good food. Pastitsio was especially good.	0	Positive	['tiny', 'good food', 'pastitsio']
938	0	5	41316	I had the braised lamb sandwich and was one of the best sandwiches of my life. Do yourself a favour and try this place! Friendly service and cosy atmosphere.	0	Positive	['lamb sandwich', 'friendly', 'cosy atmosphere']
939	0	3	41706	This spot is close to my job so I decided to check it out for lunch. The prices are just about what you would expect for Soho/"South Village" sit-down lunch prices; my meal came out to $20 for a mint lemonade and a decent-sized salad. I ordered what I think may have been a special, a roasted chicken & vegetable salad. The chicken was unbelievably dry, to the point where I had tough time chewing w…	0	Negative	['soho/', 'south village', 'sit-down lunch prices', 'mint lemonade', 'vegetable salad', 'tough time', 'basically']
940	0	4	41234	For lunch, my friend and I had: -Lamb sandwich, juicy and flavorful. -Roasted beet salad, pretty big portion. Good thing my friend shared it with me; otherwise I think I would so bored eating only beets, and a few leaves of greens. -Classic Greek Avolemono, basically a very tangy chicken broth with orzo. My friend really likes it at this place. The place is small. There are only 6 tables, but the…	0	Positive	['-lamb sandwich', 'beet salad', 'pretty big portion', 'good thing', 'avolemono', 'tangy chicken broth', 'good service']
941	0	5	41183	Needed a quick, healthy light "lunch" and this place was perfect! Next time I'll definitely have yo plan better so I can try some of their hardier sandwiches and dishes. ALL the food looked AMAZING and the items we had were DELICIOUS!	0	Positive	['needed', 'yo plan', 'hardier sandwiches', 'all', 'amazing', 'delicious']
942	0	4	41472	Their artichoke chicken salad is good and plenty.	0	Positive	['artichoke chicken salad']
943	0	5	41036	Some good Big Greek cooking!! Came to City on a gorgeous Sunday after a brutal winter one of the first clear sunny crisp Sundays to walk about Soho one of my fav's to do... And we were hungry and decided to try this hole in a wall gem! Ã‚Â Literally a hole in the wall which I think is perfect I believe they have 5 tables and it's so small the restroom is down the hall! The food is delicious...had…	0	Positive	['good big greek cooking', 'came', 'brutal winter', 'clear sunny crisp', 'sundays', 'soho', "fav 's", 'wall gem', 'literally', 'delicious ...', 'warm pita', 'lamb stew', 'lights lit candles', 'perfect way', 'full tummy', 'real gem', 'small place', "'s home", 'home good']
944	0	4	41253	Needed a quick bite and stopped here because of the reviews. Ã‚Â It's really cute and small inside. Had the roasted sandwich and it was good. Ã‚Â Service was very friendly, too. Ã‚Â Nice place to break from shopping	0	Positive	['needed', 'Ã¢ service', 'nice']
945	0	5	41722	Food was delicious and service was great. Good atmosphere for a quick bite alone or to catch up with friends.	0	Positive	['good atmosphere']
946	0	5	41020	Awesome hole in the wall place to grab a quick bite. Great music, great vibes and great service. The lentil soup and steak sandwich was absolutely to die for. The space is really small yet cozy.	0	Positive	['awesome', 'wall place', 'great music', 'great vibes', 'great service', 'lentil soup', 'steak sandwich']
947	0	5	40786	I love this place! Great soups and Greek salad and spinach pie and tuna sandwiches. I've been a fan for years. The dining "room" is small and cramped but prices are low and the food is always fresh and delicious. I've only been there for lunch and look forward to going back for dinner. Services is fine -- not special - but more than adequate for a special little SOHO secret gem	0	Positive	['great soups', 'greek salad', 'spinach pie', 'tuna sandwiches', 'soho', 'secret gem']
948	0	5	41536	The food is amazing! The service is equally amazing! My friends and I are definitely coming back to this place.	0	Positive	[]
949	0	4	40947	Quick, delicious and filling. After a few hours of shopping in SoHo we were starving. They couldn't accommodate the three of us at first (it's tiny), but took my number and called us back like 15 mins later. Fresh ingredients and the flavors hit all the right notes. The pastitsio was delicate, the hummus was creamy and the dolmades werent too dense, or tart. Service was with a smile, too. Definit…	0	Positive	['quick', 'soho', "n't accommodate", 'fresh ingredients', 'dolmades werent', 'definitely']
950	0	4	41423	Delicious, consistent, well-priced. Food tastes clean and feels like its made with love.	0	Positive	['delicious']
951	0	5	41377	Really quaint little "hole in the wall" kind of stop. Only a block away from the avenue of the Americas in Soho. There's only 4 tables for about 8 people at anytime but it didn't seem too much of a problem at 1:30pm on a Saturday. Really freshly authentic Greek food and pure cane sugar soft drinks were definitely something different. Definitely worth 5 stars. Relatively cheap as well.	0	Positive	['really', 'americas', 'soho', 'really', 'greek food', 'pure cane sugar', 'soft drinks', 'definitely']
952	0	5	41867	Delicious lamb sandwich	0	Positive	['delicious', 'lamb sandwich']
953	0	4	41235	So... as you may notice from some of my other reviews... i am not the healthiest eater (.. I DO try). Ã‚Â Snack has about the BEST Greek Salad I have ever tasted. Ã‚Â Big juicy tomatoes... crunchy fresh cucumbers...fantastic olive oil dressing. Ã‚Â I don't eat greek salads typcially - but I do eat them at Snack...Actually, I crave them when visting New York. Ã‚Â You should try it!	0	Positive	['reviews ... i', 'healthiest eater', 'do', 'snack', 'best', 'salad', 'big juicy tomatoes ... crunchy', 'fresh cucumbers ...', 'fantastic olive oil', 'greek salads', 'snack', 'york']
954	0	4	41132	Novelty meets Mediterranean meets SoHo. This place can only squeeze in about 8-10 at 2 seater tables; and I do mean squeeze! But its a money spot for lunch or a quick on the go bite. Go for their lamb sandwich, the dressings are fantastic flavor pairings. If you're looking for something lighter for both your stomach and your wallet, try the soup. The Mediterranean sandwich is full of veggies too.…	0	Positive	['novelty', 'mediterranean', 'soho', 'seater tables', 'money spot', 'lamb sandwich', 'fantastic flavor pairings', 'mediterranean', 'great variety', 'cute location', 'good food']
955	0	2	41192	Been meaning to try this place for a while-highly recommended by a friend. Had the tuna sandwich...good but got TERRIBLY SICK after word. Also, sage tea was nice.	0	Negative	['been', 'tuna sandwich ... good', 'terribly sick', 'sage tea']
956	0	5	41770	If you're looking for authentic Greek and a cozy atmosphere, this is the place. Seriously, it's cozy. There are maybe 5-6 tables in this place. However, despite it's tininess, the server was very helpful to each and every customer in the restaurant. My girlfriend and I had to wait a few minutes to be seated but he took the time to explain some of the Greek drinks and menu items to us. The service…	0	Positive	['cozy atmosphere', 'seriously', "'s cozy", "'s tininess", 'greek drinks', 'menu items', 'tzatziki', 'cucumber yogurt', 'houmus', 'tiropitakia', 'cheese triangles']
957	0	4	41179	Great find in SoHo. Ã‚Â We could have been satisfied with the huge Greek salad and side of hummus, but also got a chicken souvlaki sandwich special that was killer. Ã‚Â It's a small place but really charming and worth checking out.	0	Positive	['soho', 'huge greek salad', 'chicken souvlaki sandwich', 'small place']
958	0	4	41204	The taramosalata is to die for. Ã‚Â I recommend the Shrimp Santorini. Also, my good friend who is Greek loves this restaurant and says it tastes very authentic!	0	Positive	['shrimp santorini', 'good friend']
959	0	4	41748	What a pleasant little shop. Tiny, cute, liquor license, credit cards accepted, intimate....perfection ensues We went for a light dinner and ordered the roasted red pepper salad and the lamb koftikas. The salad had tons of red peppers, a bit potent, but very good. But the Lamb Koftikas, omg, have you ever wondered what you're doing wrong? What's that missing secret ingredient? Well look no furthe…	0	Positive	['tiny', 'liquor license', 'credit cards', 'intimate ... .perfection ensues', 'light dinner', 'red pepper salad', 'lamb koftikas', 'red peppers', 'lamb koftikas', 'secret ingredient', 'well', "'s pine nuts", 'snack', 'great experience']
960	0	4	41000	This place is TINY! I think it fits 10 people max. Keep that in mind when considering to come here on a weekend night. The food was great though and setting romantic! I recommend coming here if you're in the area and there is an open seat. Oh word of warning, but i guess it's standard for smaller shop establishments in NYC, i saw a roach on the wall here.	0	Positive	['tiny', 'people max', 'keep', 'weekend night', 'setting romantic', 'open seat', 'oh', 'i guess', 'shop establishments', 'nyc']
961	0	5	41386	Lamb sandwich... mmm... eat here.	0	Neutral	['lamb', 'sandwich ... mmm ...']
962	0	2	41574	I ordered the spinach pies. Not very good. Soggy. No real taste. Also got the artichoke chicken salad. Portion size was huge but chicken was dry Ã‚Â Ã‚Â .	0	Negative	['spinach pies', 'soggy', 'real taste', 'artichoke chicken salad', 'portion', 'dry Ã¢ Ã¢']
963	0	5	41831	This tiny cafe on Thompson has been a favorite of mine for years, and I'll tell you why. Everything is fresh and the attention to detail makes it a keeper. The lamb sammie on ciabatta is melt in your mouth chunks of lamb, with roasted onions and pretty much to die for. It's big enough for two gals to share, for sure. My favorite soup of all time, they rock here -- the Avgolemono is super lemony a…	0	Positive	['tiny cafe', 'thompson', 'lamb sammie', 'mouth chunks', 'favorite soup', 'avgolemono', 'super lemony', 'dente orzo', 'served', 'olive oil', 'fresh bread', 'jordan']
964	0	4	41200	I was impressed! This was my first time picking up food from Snack. I had no idea it was a Greek place after walking by a few times. I was pleasantly surprised by the quality at this tiny but quaint eatery. I'm half Greek so I've had a lot of Avgolemeno soup - I got the Snack version and was totally blown away! I loved the big orzo rice and the flavor was perfectly lemony and super delicious. The…	0	Positive	['snack', 'greek place', 'quaint eatery', 'avgolemeno', 'snack', 'big orzo rice', 'super delicious', 'artichoke', 'wow', 'generous amount', 'tasty toppings', 'minor suggestion', 'overall amazingness']
965	0	4	41384	Ohhh Snack. I love you, Snack. I order from here often since it's close to my work and their delivery is always precise and on-time. Their avgolemono and vegetarian souvlaki are fantastic and I hope that one day, maybe, I'll be able to replicate their giant beans in that delicious dill tomato sauce. I haven't yet eaten in the store itself, but I'm sure it'll be just as enjoyable as digging into m…	0	Positive	['ohhh snack', 'snack', 'vegetarian souvlaki', 'giant beans', 'delicious dill tomato sauce', 'brown paper sack', 'soho']
966	0	3	40739	I don't understand the whole "You can't order off the lunch menu if you're sitting down for dinner" thing, especially when your restaurant is empty. Ã‚Â You'd think they'd be glad for the chance to earn a tip and the glass of wine or 2 I might order... but I guess not. Ã‚Â -1 star for that... The lamb sandwich to go though was pretty awesome. Ã‚Â I'd go back and try a sit down dinner, but I guess…	0	Positive	["ca n't order", 'lunch menu', 'lamb sandwich', 'pretty awesome']
967	0	4	41094	Perfect for what the name implies: great butter bean salad and even better winter soups. Perfect for dates or other one-on-one dinner. I wouldn't bring a part of more than four here - it's exclusively single tables and seats maybe 14 all together. Really a gem, especially because it doesn't advertise itself as a Greek restaurant, but the food is definitely Mediterranean.	0	Positive	['perfect', 'name implies', 'great butter bean salad', 'winter soups', 'perfect', 'one-on-one dinner', 'really', "n't advertise", 'greek restaurant', 'mediterranean']
968	0	4	41869	Really delicious sandwich- had the lamb. It was enormous and I was able to eat it in two meals. Tight though, so I'd recommend grabbing and going. Definitely a neat block to visit for lunch if you ever get bored of Sullivan st. Plus they accept credit cards!	0	Positive	['really', 'delicious sandwich-', 'tight', 'definitely', 'neat block', 'sullivan', 'credit cards']
969	0	2	40762	I went to this place once before and LOVED it. I bragged about it to a friend and took her to eat there last week. Well, it wasn't good a second time around and that is a shame. We ordered the tuna salad, skordalia (garlic dip) and chicken souvlaki sandwich. The tuna salad was fine - I really can't complain about that. The skordalia was not fine and was more like soup than a dip. So watery and no…	0	Positive	['loved', 'well', "n't good", 'tuna salad', 'garlic dip', 'chicken souvlaki sandwich', 'tuna salad', "ca n't complain", 'chicken souvlaki sandwich', 'super weird waitress', 'anyway', "ca n't"]
970	0	4	40942	Delicious, savory, creamy--try the pastitsio, vegetarian mousaka, stuffed grape leaves, baklava. Lunch-wise, I wouldn't recommend the artichoke/chicken salad--the big chunks of chicken resembled the big chunks of potato. Lovely atmosphere--just a few tables lined up along a mirrored wall, across from imported canned goods. Intimate at night, and bright and charming at lunch.	0	Positive	['delicious', 'vegetarian mousaka', 'grape leaves', 'lunch-wise', 'artichoke/chicken salad', 'big chunks', 'big chunks', 'lovely atmosphere', 'intimate']
971	0	4	41085	Super small but it felt cozy rather than cramped. Get the lamb sandwich!!!	0	Negative	['lamb sandwich']
972	0	1	41414	Lacklustre service, soggy lukewarm spinach pie and two-day-old cucumber salad. Go to Local instead!	0	Neutral	['lacklustre', 'lukewarm spinach pie', 'two-day-old cucumber salad']
973	0	3	41684	I am Greek, and a huge fan of Greek food, so a bit of a tough critic, but Snack is very good. Not fantastic, but pretty good. The tzatziki and hummus is awesome, but make sure to get extra pita!	0	Positive	['huge fan', 'greek food', 'tough critic', 'snack', 'extra pita']
974	0	4	40708	A friend recommended I try Snack - was really surprised at how much I liked it. The grape leaves were really good. I don't know what they put in them, but I'm pretty sure they laced them w/ amazing. The feta appetizer special equally good. Only "eh" was the grilled octopus, WAY overcooked, almost like it was day old microwaved. But, 4 out of 5 shared appetizers is a win for me.	0	Positive	['snack', 'grape leaves', 'feta appetizer', 'way']
975	0	2	40735	Followed the great Yelp reviews to grab a sandwich here for lunch. Didn't realize it opens at 12, showed up at 11:50. The person working there opened the door and said they wouldn't be open for 10 minutes, which didn't seem like a big deal. Then she kept telling people it would be a few more minutes, until we were finally allowed in close to 12:05. I ordered the chicken sandwich and lemonade. Whe…	0	Positive	['followed', 'yelp', 'chicken sandwich', 'good day', 'snotty', 'tiny lemonade ...', 'tough roll', 'wrong thing', "wo n't", 'potbelly']
976	0	5	41588	YUMS! I just tried the Carp Roe and it's sooooooooooooo good! I like the Feta with Tomato too! The Combination Platter is the jam.	0	Positive	['yums', 'carp roe', "'s sooooooooooooo good", 'feta', 'tomato', 'combination platter']
977	0	3	40756	I'm going to start off by admitting my rating may be influenced by the fact that I have to go way out of my way to get to this place. So I might be judging it more harshly because I expect it to be better given the effort to get there. Service is great. Everyone in the cozy restaurant is very friendly and helpful when it comes to suggestions of what to order. The place is probably best for a quie…	0	Positive	['everyone', 'cozy restaurant', 'quiet lunch date', 'lamb sandwich', 'pretty darn', 'actual ingredients', 'tiny little triangles', 'spinach-y goodness', 'definitely', 'light snack', 'own preferences', 'overall', 'nice place']
978	0	2	41143	Stopped in for lunch takeout during work. Ã‚Â I asked the server what is better: Roasted Vegetable Sandwhich or Vegetable Souvlaki. Ã‚Â He replied boastfully with the Vegetarian Souvlaki. Ã‚Â Apparently he enjoys tzatziki sauce running out of his pita, down his hands and all of his face. Ã‚Â Unfortunately, I do not. Ã‚Â The taste didn't make up for the mess!	0	Positive	['stopped', 'lunch takeout', 'roasted', 'sandwhich', 'souvlaki', 'vegetarian souvlaki', 'tzatziki sauce']
979	0	4	41474	Delicious. Ã‚Â Get there early for a seat, or better yet, order take-out and snag a table down the block in the corner park. Favorites: Ã‚Â Artichoke Chicken Salad, Feta Cheese Meze --	0	Positive	['delicious', 'corner park', 'favorites', 'artichoke', 'salad', 'feta cheese meze']
980	0	5	41383	I was trying to wait until after my headrush died down before posting, but it has been an hour and I am still relaxed and in a great mood from the Lamb sandwich. Ã‚Â It was fantastic, got it to go.	0	Positive	['great mood', 'lamb']
981	0	4	41642	mmm very tasty. Kind of cramped though.	0	Positive	['kind']
982	0	3	40935	Nice little Greek restaurant that serves authentic Greek dishes but don't go if you're looking for a gyro (the only type of Greek food I'd ever had). Its a very small, quaint restaurant (seats a total of 10 people). The food was very good (I had a veal and rice dish) but the portions were just a little small.	0	Positive	['nice', 'greek restaurant', 'greek food', 'quaint restaurant', 'rice dish']
983	0	4	40628	a whole in the wall, but get there outside regular lunch hours and it's all good Salads are nice portions and very tasty Mint lemonade is delicious very tasty lamb meatballs I guess if you go there more than 10 times, it's a good sign. nice staff too no 5 stars because it's quite impossible to go there with more than one person	0	Positive	['regular lunch hours', 'salads', 'nice portions', 'mint', 'tasty lamb meatballs', 'good sign', 'nice staff']
984	0	4	40629	Small place big on taste. Stopped in with my wife after shopping. Absolutely delicious. very friendly waitress too	0	Positive	['small', 'stopped', 'absolutely', 'friendly waitress']
985	0	5	40878	most neighborhood-y place in the neighborhood.	0	Positive	['neighborhood-y place']
986	0	3	41387	This place is nice but the menu is very limited. Food is very good, as is the service. Space is really small, so make sure to get a reservation.	0	Positive	[]
987	0	4	41417	We would love to come here more often. But its a small place and there is always a long wait. We like everything we've tried and will definitely come back again.	0	Positive	['small place', 'long wait']
988	0	3	41038	Snack is an adorable little restaurant. It is quite small, so you'll have to be comfortable being very close to your neighbor. We went for dinner. The menu is heavy Mediterranean. Ã‚Â There weren't any sandwiches on the dinner menu. The service was good. There is a very small greek wine list and beer menu. I am not a huge fan of either. The food was good. They have great thick pita. The humous wa…	0	Positive	['snack', 'adorable little restaurant', 'mediterranean', 'dinner menu', 'small greek wine list', 'beer menu', 'huge fan', 'great thick pita', 'chicken dish', 'delicious green beans', 'overall']
989	0	5	40957	Living near by, I come here all the time. The food is great, the staff are friendly and the atmosphere is very relaxed. Absolutely recommend it-- great for a date.	0	Positive	['absolutely']
990	0	4	41488	My friend and I stumbled in here purely by accident- but it was a happy accident! We were just looking for some lite bites and what a perfect find! We both had the classic Avgolemono soup, and although it was a bit on the salty side, it was fantastic. We also split the Roasted 1.0 sandwich, which was also very fresh and very good, and a generous size. It's such a cute, cozy atmosphere with a bit …	0	Positive	['happy accident', 'lite bites', 'avgolemono', 'salty side', 'roasted', 'generous size', 'cozy atmosphere', "'s diner edge"]
991	0	4	40603	This place is so small, they have 5 tables inside and it's pretty cramped. We ordered: - Greek Iced Coffee: So good! Coffee lovers, you have to try this. - Some lemon soup? Very citrusy, but I love lemon, so I thought this was very refreshing. - Lamb Sandwich: Loved it, my friends ordered the Tuna Sandwich and the Chicken Sandwich, but I liked mine the most. The lamb was cooked and flavored well.…	0	Positive	['iced coffee', 'coffee', 'lemon soup', 'lamb sandwich', 'loved', 'tuna sandwich', 'sandwich', 'good place', 'mediterranean']
992	0	4	41560	I stumbled upon this cozy spot one shopping afternoon, weary with hunger. My actual thought @ the time was "I need a snack," when I Ã‚Â looked up & saw the sign. True story. The ONLY problem with shopping in SoHo is that there is a lack of affordable, tasty food choices. Snack is a welcomed spot. The 2nd thing that made me come in was that they have a "people on yelp! love us" sticker--& they def…	0	Positive	['cozy spot', 'true', 'only', 'soho', 'tasty food choices', 'snack', 'dollars shy', 'lamb sandwich']
993	0	4	41391	Snack is a solid pick! Ã‚Â On a sunny Monday in mid-October, the restaurant was full of people. Ã‚Â While the tables were occupied, the turn around was fairly quick. Ã‚Â With a hospitable, friendly wait staff, I did not feel rushed. Ã‚Â I enjoyed the Greek Salad. Ã‚Â Although modest and simple, the freshness was definitely apparent. Ã‚Â I will go back again -- from what I have heard, the savory p…	0	Positive	['snack', 'friendly wait staff', 'salad', 'savory pies']
994	0	4	41571	What a wonderful Greek restaurant! Ã‚Â We had to wait an hour to get a table, but it was worth it. Ã‚Â They make every classic Greek favorite you could possibly be craving. Ã‚Â Everything we ordered came out tasty, fresh, and delicious. Ã‚Â We also enjoyed the cozy atmosphere and the super nice and accommodating staff. Ã‚Â The waitress was honestly concerned about how long we had been waiting. Ã‚…	0	Positive	['wonderful greek restaurant', 'cozy atmosphere']
995	0	5	41154	It may have been rainy outside, but Snack was cozy, toasty...and Greek! I arrived just-in-time to snag a warmly-lit window seat and avoided the dinner rush! Ã‚Â The super-friendly waitress kicked things off with a flight of savory spinach and cheese pies. Ã‚Â For my main, the veal meatballs made fast friends with prunes and a red wine reduction. Ã‚Â I washed it all down with a cup of honey-spiked…	0	Negative	['snack', 'toasty ...', 'warmly-lit window seat', 'dinner rush', 'savory spinach', 'cheese pies', 'veal meatballs', 'fast friends', 'red wine reduction', 'mediterranean oasis', 'greek coffee']
996	0	4	41510	Exploring SOHO and after searching for what felt like an eternity for non street vendor food we stumbled on this gem. Saw all those great reviews on their store window so decided to go in. This small little resto impressed with big flavours and fresh ingredients. Ordered their lamb sandwich (so yummy) and chicken slovaki sandwich. I wish we had a place like that here in Toronto.	0	Positive	['exploring soho', 'non street vendor food', 'saw', 'great reviews', 'store window', 'small little resto', 'big flavours', 'fresh ingredients', 'ordered', 'lamb sandwich', 'chicken slovaki sandwich', 'toronto']
997	0	4	41247	On a Friday night, my boyfriend, my roommate, and I were craving Greek, so we were excited to find Snack was so close to us. We got worried when we noticed that the whole restaurant was 4 or 5 tables, but luckily they were able to seat us right away. We ordered tzatziki to start, I got the avgolemono as my meal (wasn't too hungry), and both my roommate and boyfriend got the lamb stifado. The boyf…	0	Positive	['snack', 'whole restaurant', 'lamb stifado', 'boneless lamb rib', 'creamy', 'soft pita triangles', 'pita basket', 'whole bowl ...', 'lamb stifado', 'delicious rice pilaf', 'snack', 'pretty big portion']
998	0	5	41483	Take my advise and order anything from here and it'll be good. But whatever you do, please order the Greek style iced coffee. Please. OMG. Heaven on earth.	0	Positive	['greek style', 'please', 'omg', 'heaven']
999	0	4	41433	Came here for dinner. They do not have the chicken potato butter bean salad for dinner, which I was craving, but the upside is I got to explore other parts of the menu. Like the gigantes bean salad. I could eat a double portion of that with some pita for dinner. The flavors here are fresh and delicious, and their pastitsio is like a favorite memory - beef and mac and cheese wrapped in cream and n…	0	Positive	['came', 'chicken potato butter bean salad', 'gigantes bean salad', 'double portion', 'favorite memory', 'upscale', 'comfort food', 'vegetarian mousaka', 'ground sirloin']
1000	0	4	41688	The salad special (poached chix, goat cheese toasts, tom, eggplant, etc etc) was SO GOOD! The dressing is tasty enough to make anything delish. Cute (and tiny) place, too.	0	Positive	['goat cheese toasts', 'etc etc', 'so good', 'cute']
1002	0	4	40981	Just got back to my desk, I can still taste the insane goodness that was the highly recommended lamb sandwich. I know, I should wait until the spell has worn off to review my lunch. I don't care, THE WORLD NEEDS TO KNOW. Get the lamb. Just do it. $16 for lunch for 2 people, we split the lamb sandwich (how many times can I say 'lamb' in this review?) and the tzatziki with pita. The sangwich was pe…	0	Positive	['insane goodness', 'lamb sandwich', "n't care", 'the world needs to know', 'lamb sandwich', 'greek food', 'tight space', 'lamb lamb lamb']
1003	0	3	41349	Snack is a tiny restaurant tucked away in the village with a dim, casual, and cozy ambience serving authentic Greek food. It's more of a take out style Greek restaurant with table service. By night, candles appear on every table, and a separate menu for dinner is served that's not available during the day. The waitress had to pull out the table, also very tiny in order for me to sit on the inside…	0	Positive	['snack', 'tiny restaurant', 'cozy ambience', 'greek food', 'greek restaurant', 'table service', 'separate menu', 'double zero', "ca n't", 'small space', 'boylan', 'greek fruit juice', 'nice blend', 'fresh ingredients', 'tzatziki', 'greek yogurt dip', 'crunchy shreds', 'warm pita', 'spinach pie', 'thin triangular', 'hot pocket', 'actual pie', 'flakey crust', 'right amount', 'salad', 'vegetarian m…
1004	0	3	41220	it is small and really cute place in SOHO. Clean and friendly service. I had the greek salad - it is over priced. The portion is small and it has only feta cheese, cucumber and onion. Taste is good and I will probably go back, but the portion is too small compare to the price.	0	Positive	['cute place', 'soho', 'clean', 'friendly service', 'greek salad', 'feta cheese', 'taste']
1005	0	4	40865	I crave Snack's delicious food at least once per week. I love so many dishes on the menu. Ã‚Â The veal meatballs, the lamb sandwich, the tasty Greek salad and the freshest tzadziki make me happy. Ã‚Â I also love the lemon potatoes and have been known to cobble a meal out of those and the aforementioned tzadziki. Everything is quality and they have excellent Greek wines on the menu.	0	Positive	['snack', "'s delicious food", 'veal meatballs', 'lamb sandwich', 'greek salad', 'freshest tzadziki', 'lemon potatoes', 'aforementioned tzadziki', 'excellent greek wines']
1006	0	5	40833	I have a confession to make! While observing Pre Easter Lent I was dreaming about 2 things: steak from a grill and a lamb sandwich from Snack... Thats how good it is!!! Don't get me wrong, there is a wide variety of amazing items on their menu, it's just that particular sandwich really got my soft spot! My personal conspiracy theory is that they actually put some kind of a drug into it, like thos…	0	Positive	['pre easter lent', 'lamb sandwich', 'snack', 'thats', 'wide variety', 'amazing items', 'particular sandwich', 'soft spot', 'personal conspiracy theory', 'chinese ppl', 'have', 'perfect', 'dinner hours ...', 'special greek coffee', 'time i', 'complimentary batch', 'imaginary coffee']
1007	0	4	41590	Just grabbed lunch here for the first time. Got the pikilia plate. Will definitely be coming back again! Helpful staff and they made my to-go lunch order quite fast.	0	Positive	['got', 'pikilia plate', 'will', 'helpful', 'to-go lunch order']
1008	0	4	41086	Really charming and intimate setting-- don't understand why the restaurant is called Snack, but the Greek food is great. Our favorites were the veal kibbe/ meatballs (they melt in tour mouth) and roasted feta which was off the menu. We had the mixed mezze starter which was also very nice, but all three dishes are more than enough for two people.. Our waitress was fantastic and really knew the men…	0	Positive	['really', 'intimate setting', 'snack', 'greek food', 'veal kibbe/ meatballs', 'tour mouth', 'mezze starter', 'will']
1009	0	4	41371	This place awfully small, but don't under estimate the place size for the quality of food. I really enjoyed eating here, it seems they make it fresh once you order, it's not per-made food. I ordered spinach and cheese puff (i forgot the real name), but taste yummy. Tips: Place gets crowded after 9 pm	0	Positive	['place size', 'per-made food', 'cheese puff', 'i forgot', 'real name', 'taste yummy', 'tips']
1010	0	4	40827	Oh my goodness! For some reason I have never gotten into Greek cuisine, but after one dinner here, consider me among the converted. This place made me think past feta cheese and gyros and opened up a world of delicate, delicious Greek delicacies. Portions are surprisingly big -- after just two appetizers I was forcing myself to finish my entree. The place is TINY, so get there early (even on a we…	0	Positive	['oh', 'past feta cheese', 'greek delicacies', 'portions', 'tiny']
1011	0	3	41130	Decent mediterranean place. The space is very small, but the dishes are fresh and the service is friendly. A little overpriced in my opinion, and I don't understand why there's an extra charge for pita, especially with soup or hummus... Beet salad is very fresh, but too large for being JUST a beet salad. Soups are also tasty and hearty, in particular the lentil soup, but a tad on the salty side.	0	Positive	['decent', 'mediterranean place', 'extra charge', 'hummus ...', 'beet', 'just', 'beet salad', 'soups', 'lentil soup', 'salty side']
1012	0	3	41175	Small and simple Greek restaurant with some original items on menu. Food was good, not great and a tad over-priced. Seriously, $16 for some hummus and pita?	0	Positive	['small', 'simple greek restaurant', 'original items', 'seriously']
1013	0	5	40684	oh my god. Ã‚Â i literally just finished the vegetarian moussaka two minutes ago and i can say without a doubt that this is one of the best lunches i've had in a long time. Ã‚Â ordered takeout so can't comment on the dining experience but i will definitely be back.	0	Positive	['Ã¢ i', 'vegetarian moussaka', "lunches i 've", 'long time', "ca n't comment"]
1014	0	4	41438	What a lovely little find! Super cutesy little precious jewelry box of a restaurant. I came here for lunch on my own and found it empty, save for one other patron. There are only about five or six tiny little tables, so I imagine it would be tough were it crowded, but it's the perfect spot to dine alone. I ordered the pastitsio without really knowing what it was and HOLY CRAP. It's a beefy, macar…	0	Positive	['precious jewelry box', 'tiny little tables', 'perfect spot', 'holy crap', 'bÃ£Â©chamel-y pie', 'boylan', "'s sodas"]
1015	0	5	41412	How did I not know about this place?! This place is one of the cutest places ever. It's a small place with about 5 tables so get there early if there are more of 2 people in your party. We arrived around 9 so it was pretty busy but we hung out and had some drinks while we waited. The food is so fresh and delicious. We ordered a bunch of plates to share including the tzatziki (wow), lemon potatoes…	0	Positive	['cutest places', 'small place', 'lemon potatoes', 'greek salad', 'little wonder']
1016	0	1	41527	Fellow Yelpers, Beware!!! They serve yucky hard croutons with their cold mezzes rather than pita. I have been eating here for 6 years and today was the last straw. Is it really that costly to include some pita with a dip appetizer? Also what is with the attitude of the staff on the phone. Boo Snack Boo. I will no longer be eating here. Now I need to tweet about it...	0	Negative	['fellow yelpers', 'beware', 'hard croutons', 'cold mezzes', 'dip appetizer', 'boo snack boo']
1017	0	2	41100	Disappointed in SNACK b/c its super convenient and just the right size to be a neighborhood favorite...if it were good that is. OCTOPUS was truly just bad -- shouldn't have eaten it but was hungry so gulped it down. Ã‚Â They have no business serving it like that when the Greeks arguably do the best octopus preparation in the world. Ã‚Â Don't get this dish if you go to SNACK. The Saganaki was fine…	0	Positive	['disappointed', 'snack', 'right size', 'favorite ...', 'octopus', 'greeks', 'octopus preparation', 'snack', 'saganaki', 'athens', 'ground sirloin', 'lastly', 'god bless', 'man Ã¢', 'killing me', 'nonstop commentary', 'obsessive-compulsive chattiness', 'entire meal', 'really', 'sound ornery', 'wow soho', 'restaurant issue', 'weeknight meals']
1018	0	4	40870	Snack is a simple, tiny little restaurant tucked into Thompson St just north of Spring. Ã‚Â I stopped in for quick snack around 5:30 Wednesday (12/29) to hold my date and I over before our late dinner reservation. The time is important because they stop selling sandwiches after 6 pm so luckily we just made it in time to try the Lamb Sandwich. Ã‚Â I don't eat a lot of lamb or Greek food in general…	0	Positive	['snack', 'tiny little restaurant', 'thompson st', 'quick snack', 'late dinner reservation', 'lamb sandwich', 'greek food', 'small text', 'chalkboard menu', 'small', 'great food', 'good service', 'price', 'nyc']
1019	0	5	41355	snacks, to me, are tasty little tidbits of happiness... and snack is just that! Ã‚Â tasty and little. Ã‚Â i admit i was still hungry after eating here, but everything was delish. Ã‚Â i'd definitely return, but either i'd eat a little something before, or not wait until starving before coming here!	0	Positive	['happiness ...', 'Ã¢ tasty', 'Ã¢ i', "Ã¢ i 'd", "i 'd"]
1020	0	2	40986	Hmmm soso.... I can't much about it other than nothing really note worthy	0	Positive	['hmmm', 'soso ...', "ca n't", 'note worthy']
1021	0	4	41779	Snack is simple, but good - like its name! The service is always good and nice and friendly! I usually get the Chicken Souvlaki lunch sandwich, simple but good and hearty. The chunks of chicken are huge so the sandwich alone will fill you up. The special soup they make is good too - basically all of their sandwiches and salads are tasty with fresh ingredients. Can't go wrong!	0	Positive	['snack', 'souvlaki', 'lunch sandwich', 'special soup', 'fresh ingredients', 'ca']
1022	0	4	41591	This place is really charming. Ã‚Â It is a great place to have a low-key lunch. Ã‚Â The food is simple and effective - you should go.	0	Positive	['great place', 'low-key lunch']
1023	0	4	40759	Great lamb sandwich (version 1.3) for $10. As a software programmer, I'm amused that their sandwiches have version numbers.	0	Positive	['great lamb sandwich', 'software programmer', 'version numbers']
1024	0	2	40828	Lunch here is great. I always look forward to the lamb sandwich which is incredible. Unfortunately we just got back from dinner here and it was abysmal. Everyone raves about the eggplant dip and rightly so. It was the Ã‚Â highlight of the meal. The octopus was absolutely disgusting. I knew we made a mistake the moment the plate was put in front of us. Totally unappetizing presentation and I truly…	0	Negative	['lunch', 'lamb sandwich', 'everyone', 'eggplant dip', 'Ã¢ highlight', 'totally', 'cat food', 'ice cream', 'seriously']
1025	0	2	41807	We walked halfway across Manhattan for this restaurant and I wish we had stayed at home. Ã‚Â It was decent food, but it seemed I could get the same from a corner deli. Ã‚Â The flavors seemed bland and the menu cryptic about actual ingredients in the salads. Ã‚Â I will give kudos for pleasant wine and attentive, but not overbearing service.	0	Positive	['manhattan', 'decent food', 'corner deli', 'menu cryptic', 'actual ingredients', 'pleasant wine']
1026	0	2	40722	The best dishes here merit four stars, but the food is uneven. The roast chicken entree I had was terrible. Even the dark meat was dry. The breast was so dry that it took two glasses of water to get it down. I know it's only one dish, but plain chicken is really a good test of a kitchen's quality. It's easy to make a bad one because you don't have anything to hide behind -- and this kitchen faile…	0	Negative	['roast chicken entree', 'dark meat', 'plain chicken', 'good test', "kitchen 's quality", 'quality restaurants', 'nyc', 'expensive ingredients', 'large quantities', 'meat lover', 'false economy']
1027	0	4	41032	Very charming spot with delightful servers. The Artichoke Chicken Salad ($11.50) was very hearty and was enough to feed two. Kudos to the young barista who prepared my Frappe. Perfection.	0	Positive	['charming spot', 'delightful servers', 'artichoke', 'salad', 'kudos', 'young barista', 'frappe', 'perfection']
1028	0	3	41673	I had the greek salad - it was good. Ã‚Â My only complaint was the price. Ã‚Â $9.25 for a small to go salad. Ã‚Â it has the most feta I've ever had in a salad, the dressing was great, the seeds were taken out of the cucumbers, the were just the right amount of red onions, but it felt more like a side than a lunch entree. Ã‚Â Maybe I'm just not used to NYC prices yet.	0	Positive	['greek salad', 'Ã¢ $', 'right amount', 'red onions', 'lunch entree', 'nyc']
1029	0	4	41612	Came here for lunch with my coworkers. Ã‚Â All of the reviews said the sandwiches were great, but I opted for a savoury pie instead. Ã‚Â I'm glad the pie came with a Greek salad, which was both authentic and delicious. Ã‚Â The four cheese pie was a bit dry and not quite as savoury as advertised, but still filling. Ã‚Â I'd likely come back here and get a sandwich next time. Ã‚Â Also, we spotted a …	0	Positive	['came', 'savoury pie', 'greek salad', 'cheese pie', 'bit dry']
1030	0	4	41001	Holy sandwich. tuna? Ã‚Â sublime chicken? delish tea? tasty service (not part of sandwich, per se)? awesome lunch, well-served.	0	Positive	['holy sandwich', 'Ã¢ sublime chicken', 'delish tea', 'tasty service', 'awesome lunch']
1031	0	3	41101	I have been to both Snack and Snack Taverna... Snack is great for lunch or a light dinner, I think their food is fantastic, clean simple food. I love all their salads and pretty much everything I ever had there. Problem: the place is SMALL and it is ANNOYING to be squashed while you eat and more ANNOYING to be watched as soon as your done so they can turn the table over... Snack Taverna's food ju…	0	Positive	['snack', 'snack taverna', 'snack', 'light dinner', 'clean simple food', 'problem', 'small', 'annoying', 'annoying', 'snack taverna', "'s food", 'good ...']
1032	0	4	41583	Very good Greek lunch! Ã‚Â The avgolemono soup, greed salad and lamb sandwich rocked.	0	Positive	['good greek lunch', 'avgolemono soup', 'lamb sandwich']
1033	0	4	41323	Holy cute place, tasty morsels of food but tiny to the tune of fitting 10 people into the dining area max, That's probably being generous. Either way Snack has awesome fresh dishes and is a great place to get away from the crazy tourist areas in SoHo.	0	Positive	['holy cute place', 'tasty morsels', 'area max', 'either', 'snack', 'great place', 'crazy tourist areas', 'soho']
1034	0	2	41467	As far as Greek goes, Ã‚Â "meh. I've experienced better", and the worst part is, I've had better food that was far less expensive. Snack is a smallish restaurant that's a bit too big for it's breeches. Ã‚Â If you don't live or work in the neighborhood, or get lazy after work and order expensive takeout as a last resort (me), I'm not sure why you should go out of your way to have weekend brunch or…	0	Negative	['snack', 'smallish restaurant', "'s breeches", 'expensive takeout', 'weekend brunch', 'lunchtime work crowd', 'love', 'crave', 'lemon chicken soup', 'snack', 'remote island', 'caribbean', 'soup flown', 'mykonos', 'miami', 'snack', 'pretend billionaire', 'jet fuel', 'lamb meatballs', 'beet salad', 'york', 'lemon chicken soup']
1035	0	4	40777	The weather was amazing last week and I decided to take a walk to Snack with a friend after a coworkers recommendation. Ã‚Â I was told the place was tiny (the entire place can only seat 10 people comfortably) and that we should just order the sandwiches to go. Ã‚Â Fortunately when we arrived, there was one open table and nobody waiting so we promptly sat down. The menu has many healthy options an…	0	Positive	['snack', 'coworkers recommendation', 'entire place', 'fortunately', 'open table', 'healthy options', 'ate afterwards', 'eggplant dip', 'lamb sandwich', 'tuna sandwich', 'eggplant dip', 'normal affair', 'tuna sandwich', 'lamb sandwich', 'savory tomato aioli', 'fluffy ciabatta bread', 'lamb sandwich']
1036	0	2	40970	This place has been disappointing to me. I've been couple of times and I couldn't help to notice that there are some recurring problems: 1)certain food they have is good (the eggplant dip is my fav), but other things on the menu are horrible (I had the octopus and trust me if I say that it was the worse octopus I had in my whole life) 2)the portions are small, and the prices are quite high 3)the …	0	Negative	['certain food', 'eggplant dip', 'whole life', 'cozy place', 'greek food', 'good spot']
1037	0	3	41829	a quietly pleasant nook less polished than its older brother snack taverna in the same neighborhood. snack however is far more comfortable and on an afternoon lunch break is choice place to eat. memorable foods include: greek salad, beet salad, avgolemono soup, melitzanosalata, roasted and vegetarian souvlaki sandwiches. the entrees are more expensive and come in smaller portions, so be proud you…	0	Positive	['pleasant nook', 'brother snack taverna', 'afternoon lunch', 'choice place', 'memorable foods', 'greek salad', 'beet salad', 'avgolemono soup', 'vegetarian souvlaki sandwiches', "'s alright", 'selective menu', 'soho pocket', 'helpful service', 'low key', 'upper middle class environment', 'greek/mediterranean food', 'stars ]']
1038	0	5	41874	This was a great stop for a bit of GREEK yumminess!!! I emphasize the Greek because I was slightly lead to belive that this place may offer some falafel delicacies but this is a true Greek experience. The food is fresh, fantastic and a huge bargain in my book! Lunch combo was $12 and it could have been shared. The sandwiches are huge and amazing, try the Tuna. You will not be dissapointed. A winn…	0	Positive	['greek', 'falafel delicacies', 'true greek experience', 'huge bargain', 'lunch', 'tuna']
1039	0	4	41649	I've eaten at Snack a few times and I've always had a good meal. As others have noted, anything having to do with lamb is delicious here. Ã‚Â The location itself is tiny, but I've never had to wait for a table. The prices are good. Anything on the lunch menu and most of the dinner items are either well priced and/or worth it. The stuffed peppers and tomatoes did not merit a $17 price tag despite …	0	Positive	["'ve eaten", 'snack', 'good meal', 'anything', 'lunch menu', 'dinner items', 'price tag', 'definitely', 'lunch-time lamb sandwich']
1040	0	4	41073	I've been going to Snack ever since it opened, over 8 years ago. It's teeny tiny, so odds are that you will have to wait on a bench outside for a table. Ã‚Â The food used to be amazing and has gotten a little unpredictable, but in general I would recommend the Avolegdomo (perfect if you have a cold), lemon chicken soup with orzo. it's tasteful and tangy. Ã‚Â The Spanikopitika (spinach triangles) …	0	Positive	['snack', "'s teeny", 'avolegdomo', 'lemon chicken soup', 'spanikopitika', 'spinach triangles', 'flaky filo dough', 'salads', 'butter bean salad']
1041	0	4	40645	If you're shopping in Soho, stop by here and grab an iced coffee. I love iced coffee and this one is really special. Otherwise, come for dinner. Grab a couple of friends and squeeze into a tiny booth. Order a bunch of things to try (particularly the fava bean dip and the hummus) and get your snack on. If you get a bottle of wine, they will serve it with water glasses. What's not to love?	0	Positive	['soho', 'otherwise', 'grab', 'tiny booth', 'fava bean dip', 'water glasses']
1042	0	4	41231	it's hearty comfort food. we came here for lunch last week. we had the chickpea and fennel soup, the spinach triangles, and the lamb sandwich. their portions are enormous - we were stuffed. their sage tea is a standout. the place is tiny and cute - charming simplicity. our waitress was nice.	0	Positive	['hearty comfort food', 'fennel soup', 'spinach triangles', 'lamb sandwich', 'sage tea', 'charming simplicity']
1043	0	4	41243	A very pleasant surprise. $19 buys you a delicious Braised Lamb Stifado (the meat literally falls off the bone) - served with a sweet, fruity rice pilaf and tzatziki. The saganaki appetizer is a winner as well; while I'm naturally inclined towards fried cheese, I found that this imagination of the Greek Classic straddled the fine line between being too greasy and being undercooked. The space is c…	0	Positive	['pleasant surprise', 'braised lamb stifado', 'fruity rice pilaf', 'saganaki appetizer', 'classic', 'fine line', 'service exceeds expectations']
1044	0	2	41080	So went to this place with my colleagues, it is small and cozy and the service is good. Unfortunately the Vegetarian Souvlaki I ordered was sub par, it was missing flavor, did not have the variety of vegetables that I am used to at other places which serve souvlaki and in all honesty was small compared to other places. I definitely will not be going here again but my colleagues did say the lamb s…	0	Negative	['vegetarian souvlaki', 'sub par', 'lamb sandwiches']
1045	0	5	41096	They told that they don't deliver to the NoHo. I was crying to the phone. Because the AVGOLEMONO SOUP and the LAMB SANDWICH are dying the best food after a crazy night. And a lemonade... Can I become a permanent Saturday morning customer?	0	Positive	['noho', 'avgolemono soup', 'lamb sandwich', 'crazy night', 'lemonade ...', 'morning customer']
1046	0	5	41785	My favorite restaurant hands down! My friends and I have been coming here for over 5 years. Im kinda obsessed with the avgolemono and will get 2 bowls. Love those crunchy breads. The mint lemonade is perfect in the summer.	0	Positive	['favorite restaurant hands', 'im', 'love', 'crunchy breads', 'mint lemonade']
1047	0	4	41732	Wandered soho one luncheon afternoon... a co-worker and I couldn't decide what we were in the mood for...until we bumped into Snack. Ã‚Â Considerable good reviews thanks to yelp...so we decided it's a must try. Ã‚Â Everything we ordered was pleasantly tasty. Ã‚Â My chicken sandwich was pretty kick ass, considering I do not like hard, cold bread. Ã‚Â (actually, minus the bread, I'm going to ask fo…	0	Positive	['wandered', 'luncheon afternoon ...', 'snack', 'considerable good reviews thanks', 'yelp ...', 'chicken sandwich', 'pretty kick ass', 'cold bread', 'beet salad', 'spinach pie', 'phenomenal choices', 'mediterranean', 'hearty sauces', 'olive oil', 'yummy', 'needless', 'sister restaurant', 'snack taverna', 'good meal', 'forewarning', 'tiny', 'oh', "sure hell 's", 'mediterranean dips', 'nyc', 'ma']
1048	0	3	41244	I really enjoyed my experience at this tiny yet tasty restaurant. To be honest, the first big plus was that we were seated almost immediately in this 12-seat restaurant. (Try going past 8pm.) My friend, Jennifer S., and I got the fava to start, and it was very tasty. A thicker texture than hummus. (And we got extra pita for free!) I also got the Classic Greek Avgolemon, which was my first time fo…	0	Positive	['tasty restaurant', '12-seat restaurant', 'try', 'jennifer s.', 'thicker texture', 'extra pita', 'classic', 'avgolemon', 'traditional dish', 'soup afterwards', 'jennifer s.', 'flavorful dish', 'jennifer', 'day lamb dish', 'tiny space', 'great food', 'big expensive-o']
1049	0	4	40872	Have only been once, with coworkers for lunch. Ã‚Â We didn't realize how tiny it was, but they were very accommodating in seating the 6 of us. Ã‚Â Most of us followed the waiter's suggestion and split the 3-dip appetizer and got the lamb sandwich as the entree. Ã‚Â Boy, did we over order! Ã‚Â The dips were good, but it's what I expect from hummus-type dips. Ã‚Â However the lamb sandwich was amazi…	0	Positive	['have', "waiter 's suggestion", '3-dip appetizer', 'lamb sandwich', 'hummus-type dips', 'lamb sandwich', 'pull-pork style', 'cinnamon-y flavor', 'crusty bread ...', 'oh', 'half-sandwich', 'light lunch', 'whole thing', 'food coma', 'definitely', 'snack']
1050	0	4	41163	I just wet myself....in a good way. From attacking this amazing soup! Literally my lap and face are covered in creamy lemon, chicken broth HEAVEN at the moment. First off I must begin by saying this is the first time in 3 years I have actually wrote a review on yelp while at the same time eating at the place I am yelping about. Lexy can MULTI TASK BABY! Ok back to my soup. SERIOUSLY, why have I n…	0	Positive	['... .in', 'good way', 'amazing soup', 'literally', 'creamy lemon', 'chicken broth', 'heaven', 'lexy', 'multi task baby', 'ok', 'seriously', 'typical greek food', 'salad', 'grape leaves', 'avgolemono soup', 'classic', 'soup', 'lamb sandwich', 'soup', 'perfect balance', 'bitter lemon', 'creamy goodness', 'chicken broth', 'home made greek chicken soup', 'type chicken', 'soup', 'ok', 'lamb sandwich…
1051	0	4	41699	I've been going to Snack for close to 5-6 years. My favorites are the avgolemono soup (I always order two), the cheese triangles, the lemon lentils, the greek salad, the beet salad, and the sandwiches. The garlic potato dip is POWERFULLY garlicky. I would order their entrees more often if they weren't so gigantic. Between the food and the cozy ambiance, I'd give it five stars but I had to take on…	0	Negative	['snack', 'avgolemono soup', 'cheese triangles', 'lemon lentils', 'greek salad', 'beet salad', 'garlic potato dip', 'powerfully', 'cozy ambiance', 'blond waitress', 'forgets orders', "ca n't", 'two-seat tables']
1052	0	4	40955	Oh my gosh. I went here with a good friend during a lady date; neither of us had ever been before. There are only about 4-5 tables (seriously), so we had to wait, but sweet Jesus...that lamb sandwich. I would wait a year for that beauty. So tender and flavorful, on bread so fresh! It was a dream come true for my mouth. Topped off with a mint lemonade (one of my favorite things) and it made for an…	0	Positive	['oh', 'good friend', 'lady date', 'jesus', 'lamb sandwich', 'topped', 'mint lemonade', 'favorite things', 'memorable lunch']
1053	0	4	41188	Snack is a tiny restaurant with lots of flavor! Ã‚Â I went for dinner - which apparently has a different menu than lunch - and ordered the fava as an appetizer and the boneless lamb for my entree. Ã‚Â Yum and Yum! Ã‚Â When I first get my meal, I thought that I wouldn't be full by the end, but I am still stuffed! Ã‚Â I suppose it helps that I ate the fava with pita bread (which was warm and chewy)…	0	Positive	['snack', 'tiny restaurant', 'different menu', 'boneless lamb', 'yum', 'yum', 'pita bread', "friend 's", 'classic greek soup', 'greek roommate', 'ny', 'penicillin', 'chicken broth', 'fresh ground pepper', 'lamb sandwich', 'lovely site', 'yelp']
1054	0	4	41174	I went here because sincerely, I've spent too much during my nights out and I need to start saving for my year-end trips... hence, logically focusing more on the cheap eats. (and obviously going out on fewer dates) I went to this place expecting average food and I'm glad I was really wrong about this place. There is nothing average about the lamp sandwich. It is simply amazing.... I had a mint li…	0	Positive	['year-end trips ...', 'cheap eats', 'average food', 'lamp sandwich', 'amazing ...', 'mint lime juice', 'mint i', 'staff', 'chicken sandwich', 'beware', 'greco-turkish style coffee', 'individual tastes', 'reminds', 'africa']
1055	0	5	40714	A friend who used to live in NY gave us a three page list of her favorite restaurants to try in NY, but she said that if she had to pick just one place to endorse, Snack would be it. We trusted her judgement and had a delightful dinner in this tiny little SoHo spot. We are lucky to have gotten in - we walked in on a Sunday evening, about 20 minutes before the kitchen closed and they were able to …	0	Positive	['ny', 'page list', 'favorite restaurants', 'ny', 'snack', 'delightful dinner', 'soho', 'lamb stew', 'bf', 'fabulous meal', 'nyc', 'tiny tables']
1056	0	5	40924	Thanks to my little Yelp friends, I knew to pop in here after a day of shopping around SoHo. Great find! On a Sunday night, we were the only ones in there and had the waitress' attention all to ourselves. This paid off because during our wine selection process, she let us taste every white wine on the list, plus gave us her personal wine commentary. Surprise surprise, we picked her favorite wine.…	0	Positive	['thanks', 'yelp', 'soho', 'wine selection process', 'white wine', 'personal wine commentary', 'surprise', 'favorite wine', 'lamb', 'rib appetizer', 'tad bit', 'standard order', 'local gem', 'well']
1057	0	2	40910	Hmm. So far, I am not impressed. Stopped by to grab a sandwich for take out. Woman behind the counter clearly wished me to hurry up and make a decision. I placed my order and she gave me the total: $8.15. I wanted to give her exactly that amount but she would not take my five pennies to make up the five cents in 15 cents. "Oh, no pennies. He doesn't like pennies." (Who is "he"? Am I supposed to k…	0	Positive	['hmm', 'stopped', 'woman', 'oh', 'who', 'am', "n't pennies money", 'wtf', 'sat', 'tick', 'tock', 'tick', 'tock', 'bloody sandwich', 'turns', 'whole time', 'oh', 'yuppie families pile', 'dkny-sporting', 'suvs', 'lovely ciabatta bread', 'fresh ingredients', 'alidoro', 'snack']
1058	0	2	40908	Hummus Place is way better. Ã‚Â Snack is a rip off. I got a platter of three appetizers. Ã‚Â It cost $13, so I was expecting a decent amount of hummus but Snack gave me three little containers and not even enough pita to eat it with.	0	Positive	['hummus', 'snack', 'cost $', 'decent amount', 'snack']
1059	0	4	41452	Small and cozy. Agreed that customer service could be better. Anyways, best way to avoid them is just grab to go and eat at the park on Thompson and Spring. My favorite of what I had so far is the lamb sandwich. A good 8" long, floury ciabatta holds a generous portion of well flavored braised lamb, sweet onions, and arugula. Tuna sandwhich is pretty good too. Hard-braised yellowfin tuna with arti…	0	Positive	['small', 'agreed', 'customer service', 'anyways', 'thompson', 'lamb sandwich', 'floury ciabatta', 'generous portion', 'sweet onions', 'tuna', 'hard-braised', 'yellowfin tuna', 'portobello mushrooms', 'viahotiri cheese', 'lemon vinaigrette', 'ciabatta bread']
1060	0	4	41321	Food is fresh & tasty! Ã‚Â There is very limited seating & they won't seat until entire party has arrived (even if you are a party of 2!). Ã‚Â The Fresh Mint Lemonade was very refreshing! Ã‚Â Recommend the 4 cheese pie, Greek Salad and the Chicken Sandwich.	0	Positive	["wo n't seat", 'entire party', 'mint lemonade', 'recommend', 'cheese pie', 'salad', 'sandwich']
1061	0	2	40882	INCREDIBLY rude. So rude you know they are TRYING to be rude. I place a large phone order for our office, well over $100 worth of food, and the entire time on the phone the guy was as rude as possible. The culmination of the rudeness was so surprising that I'm not even angry, I'm just shocked: After ordering 6 entrees already, I said: Oh I'm sorry I don't know how to pronounce the word for the ch…	0	Positive	['incredibly', 'trying', 'large phone order', 'entire time', 'oh', 'cheese triangles', 'guy', 'cheese', 'triangles', 'tiny', 'one pita', 'almond dessert things', 'pita', 'almond things']
1062	0	5	41029	10 seats. genuinely friendly staff. but the food, the food was super fresh, homemade, and rich with flavor. their homemade taramosalata was marvelously salty. my souvlaki was yummy and fresh. def returning.	0	Positive	['friendly staff', 'homemade taramosalata']
1063	0	4	40628	decent greek food. Ã‚Â i had an eggplant/ground sirloin special. Ã‚Â it was pretty good. Ã‚Â wish i had tried the lamb. Ã‚Â :)	0	Positive	['decent greek food', 'Ã¢ i', 'eggplant/ground sirloin']
1064	0	4	41274	I dont know much about lamb, but I consider myself "experienced" when it comes to sangwiches. The chef here seems to also be experienced in the art of sangwiches. The bread on the lamb sangwich (which is only available during lunch or for takeout) is incredible. I don't even recall what other ingredients were involved, I was stuck on the bread.	0	Positive	['lamb sangwich']
1065	0	5	41878	Absolutely fantastic, Snack was my oasis from work when I worked down in SoHo. If it's your first time their and you like lamb, you must try their braised lamb sandwich. Extremely tender and juicy, sometimes too juicy, haha, and amazing depth of flavor. You'll be going back to try everything else, which won't disappoint. Friendly staff!	0	Positive	['absolutely', 'snack', 'soho', 'lamb sandwich', 'extremely', 'amazing depth', "wo n't disappoint", 'friendly']
1066	0	4	41779	Love this place. Its the perfect little place to come for lunch and also dinner. The food is consistently good and comes out ultra fast. Ã‚Â The only real complaint is that the service can sometimes be a little abrupt - but whatever this is NYC. Ã‚Â Must haves - Lamb Sandwich, Butter Bean Salad, Saganaki and Mezze Plate.	0	Positive	['love', 'perfect little place', 'real complaint', 'nyc', 'lamb sandwich', 'butter bean salad', 'saganaki', 'mezze plate']
1067	0	5	40697	Snack has become my new favorite lunch spot in SoHo. My favorite things to order are the vegetarian souvlaki (love the butter beans) and spinach pie (which comes with mezze or Greek salad). It is only a 5 minute wait for take out usually and the service is great. The food has always been very tasty and as a someone with a big appetite, I really appreciate the large portions. Also, the lemonade an…	0	Positive	['snack', 'new favorite lunch spot', 'soho', 'favorite things', 'vegetarian souvlaki', 'butter beans', 'spinach pie', 'greek salad', 'big appetite', 'large portions']
1068	0	5	41398	feta mezze with warm pita and tomatoes. perfect summer food! Ã‚Â light and delicious and simple. followed by a bite of my lunchmates butter bean salad - also very, very tasty. then i had the (drum roll please) lamb sandwich. Ã‚Â the place is very tiny, as has been mentioned, but the lamb sandwich would make it worth the wait! Ã‚Â we were seated within 5 minutes, but the place seems to thin out ar…	0	Positive	['feta mezze', 'warm pita', 'perfect summer food', 'lunchmates butter bean salad', 'drum roll', 'lamb sandwich', 'lamb sandwich', 'yay', 'bench ...', 'mint lemonade', 'Ã¢ delicious', 'Ã¢ i', 'Ã¢ i', 'Ã¢ $', 'huge lamb sandwich']
1069	0	4	41267	Just had dinner at Snack for the first time last night.It is extremely small! I mean I think there was seating for maybe 10 people. There seems to be a very brisk takeout business. Our waitress was really nice .I had the tzatziki with warm Ã‚Â pita bread and it was great. Also the stuffed pepper/tomato entree-also great. Other people had the mezze platter Ã‚Â and the grilled shrimp with ouzo in t…	0	Positive	['snack', 'brisk takeout business', 'nice .i', 'warm Ã¢ pita bread', 'pepper/tomato entree-also', 'mezze platter Ã¢', 'enjoyed.the prices', 'bit high', 'alot Ã¢', 'high -who']
1070	0	4	41534	After perusing great lunch options within the SOHO area I found this gem. Ã‚Â Since I'm a fan of lamb (more lamb!!), I was intrigued by the lamb sandwhich (officially, the lamb 1.3, I believe). Ã‚Â Lamb 1.3 was great. Now as for the service coordination, while not poor, was a tad odd. Ã‚Â Because the place is so small (very few tables, that's fine), I asked for my sandwhich to be bagged up as 'to…	0	Positive	['great lunch options', 'soho', 'lamb sandwhich', 'lamb', 'service coordination', 'tad odd', "'s fine", "'i 'm", "ca n't", 'hmmm', 'minimum clock', 'small place', 'original order', 'revenue stream', "'s tracks", 'oh', 'signs post', 'credit card orders']
1071	0	4	40821	Came here for lunch and -- like many others -- went with the lamb sandwich. I've got to say I agree with everyone else. It's really good.	0	Positive	['came', 'lamb sandwich']
1072	0	5	41581	It will be a long while before I will bring myself to order anything but the Lamb Sandwich. Once you find perfection, why fight it?	0	Negative	['lamb sandwich']
1073	0	4	41176	I've only eaten the marinated vegetable sandwich (on multiple occasions), but it's so good, I've got to give the restaurant 4 stars. The interior of the restaurant itself is absolutely tiny, so if you can't find a seat and the weather permits, by all means take your sandwich (or other bench-appropriate meal) outside to eat on one of the benches outside.	0	Positive	['vegetable sandwich', 'multiple occasions', "ca n't", 'bench-appropriate meal']
1074	0	4	40917	I've been wanting to try this place for ages--but wasn't hungry enough, wasn't able to score one of the few tables, etc. Finally made it in tonight, and was duly impressed. Prices seem high ($6 for a dip with one pita, $11-$15 for appetizers, $18-$20 for entrees), but portions are huuuge. Two of us split the "Pikilia" (a Ã‚Â mixed mezze platter) and the stuffed eggplant special. The Pikilia consi…	0	Positive	['prices', '$ 11- $', '$ 18- $', 'pikilia', 'mezze platter', 'pikilia', 'grape leaves', 'lemon garnish', 'fresh pitas', 'extra pitas', 'carp roe', 'bit salty', 'eggplant dish', 'ground beef filling', 'small plate', 'water refills', 'alas', 'drunken douchebags', 'tip']
1075	0	5	40986	Wow. Ã‚Â Two words. Ã‚Â Lamb Sandwich. Ã‚Â Succulent, tender, & bursting with flavor. Ã‚Â The mint lemonade on a hot spring day hit the spot. Ã‚Â I can't wait to go again to try everything else on the menu.	0	Positive	['wow', 'lamb sandwich', 'succulent', 'mint lemonade', 'hot spring day', "ca n't"]
1076	0	5	41088	Love this place. Ã‚Â Every time I need to get my fix of Mediterranean food, this is the place to go. Ã‚Â The dipping platter with fresh pitas is awesome. Ã‚Â The Greek wine and beers are all great. Ã‚Â And all the dishes are sooo delicious. Ã‚Â If you want a nice, comfortable, good dinner for an average price, Snack is the way to go.	0	Positive	['love', 'mediterranean', 'fresh pitas', 'greek wine', 'sooo delicious', 'good dinner', 'average price', 'snack']
1077	0	4	40830	was there for lunch thursday and had the gigantes bean salad and the mint lemonade. the beans? gigantic! ;) both were delish, the service was nice and friendly, and they have the setup locked down. very organized. very cute. it's super small but cozy in that don't-get-too-close-to-me kind of new york way.	0	Positive	['lunch thursday', 'gigantes bean salad', 'mint lemonade', "don't-get-too-close-to-me kind", 'new york way']
1078	0	4	41220	I had the pleasure of placing a large corporate lunch order from Snack the other day. Ã‚Â The acting manager was extremely helpful, providing recommendations on how much to order for the group and promising to have our meal arrive by 1:30 pm. Ã‚Â Even though the deliveryman got a bit lost within our building, he still managed to arrive at 1:30 pm on the dot. Ã‚Â I could not have been happier with…	0	Positive	['large corporate lunch order', 'snack', 'combination platters', 'carp roe', 'roasted eggplant', 'hummus', 'carp roe', 'fishy flavor', 'silky texture', 'salad', 'artichoke', 'salad', 'large hunks', 'tender chicken', 'butter beans', 'string beans', 'earthy combination', 'black olive vinaigrette', 'spinach pie', 'moist phillo dough', 'bold spinach', 'gooey cheese filling', 'taste buds', 'hearty pie…
1079	0	5	40995	I finally went back today! I was so happy :) I think this place is such a wonderful place to go for lunch, definitely worth it! A good place to get the food to go, and go sit in the sun and eat your lunch at the park right a couple of steps away. It's inexpensive and of course delicious! The lamb sandwich was DELISH, all the flavors went together very well. I couldn't decide to get the spinach pi…	0	Positive	['wonderful place', 'good place', "'s inexpensive", 'course delicious', 'lamb sandwich', 'delish', 'spinach pie', 'chicken boureki', 'ended', 'i guess', 'again', 'chicken =p', 'love', 'place ...', 'friendly ...', 'new york ...', 'california ...']
1080	0	5	41438	All I have to say is "Lamb Sandwich to go please" --- probably about once a week and life is good!! Haven't had much of the other food there. Did try a Greek salad that was a standard Greek salad but with very fresh produce.	0	Positive	['lamb sandwich', 'have', 'greek salad', 'standard greek salad']
1081	0	5	41012	Awesome! Ã‚Â Make sure you try the greek salad and the eggplant spread.... very tasty. Ã‚Â The grape leaves are good, but not to-die-for. For the meal I went with the spinach pie, and washed it down with diet birch soda, which actually tastes good. Ã‚Â Not "good for a diet soda" good, but just "good". And yes, save room for baklava.	0	Positive	['awesome', 'greek salad', 'grape leaves', 'spinach pie', 'diet birch soda', 'diet soda']
1082	0	3	40884	Was compelled to update my review after dinner last night. I went to snack at around 8:30 - 9:00 pm to get takeout on my way home from work. Previously I think I went on the early side and they charged me lunch prices. In my old review I said: "Vegetarian Moussaka to die for. $14 and change after tax is a little pricey for every night." WELL... if it's dinnertime, the vegetarian moussaka is $19.5…	0	Positive	['was', 'way home', 'previously', 'early side', 'lunch prices', 'old review', 'vegetarian moussaka', 'well', "'s dinnertime", 'vegetarian moussaka', 'variable pricing annoys', 'great food', 'but']
1083	0	4	40697	super cute place--the kind you love stumbling into after walking around soho on a balmy saturday with a friend. and what luck that that is exactly what happened to me! window shopping takes a lot out of a girl so my friend and i decided to stop and get a bite to eat at snack. and boy was i glad. lamb sandwich? to die for. juicy, flavourful, perfection. wasn't a fan of the greek coffee though, and…	0	Positive	['super cute place', 'balmy saturday', 'lamb sandwich', 'greek coffee', 'perfect spot', 'name suggests']
1084	0	4	41452	These types of places are what make NYC such a culinary destination. Small, cramped, and full of flavor....loved it. My girlfriend claims their lamb sandwhich is the best ever and I got to say that everything I tried was on point. If I ever opened a place like this down south all the folks would go crazy over elbow room, but in NYC you can open up great things in someone's walk in closet and be d…	0	Positive	['nyc', 'culinary destination', 'small', 'flavor ...', 'girlfriend claims', 'lamb sandwhich', 'elbow room', 'nyc', 'great things', 'great lunch spot', 'soho']
1085	0	4	40649	This tiny place may not be impressive on the outside but after a few bites you'll realize that this place doesn't serve your typical diner Greek food. I had the Vegetarian Mousaka which was good however the mushroom was a little overpowering. Ã‚Â Perhaps the Pastitsio would be a better bet for those not crazy about mushrooms. The lamb sandwich was also very good. Ã‚Â The lamb was very flavorful a…	0	Positive	['tiny place', 'typical diner', 'greek food', 'vegetarian mousaka', 'pastitsio', 'lamb sandwich', 'baklava']
1086	0	3	41589	Looking for a casual lunch place in Soho, I found Snack to be the highest rated in the area. I actually wasn't very impressed with the food although I liked the cute ambiance. The place is really small ( 4 tables total) but our servers were extremely nice and accommodating. I got the chicken sandwich..I felt the chicken was bland and not spiced enough..i liked the bread and sauce but overall I re…	0	Positive	['looking', 'casual lunch place', 'soho', 'snack', 'cute ambiance', 'tables total', 'chicken sandwich..i', 'lamb sandwich..which']
1087	0	5	41713	My wife and I were in NYC in Jan for a weekend get away from San Francisco. I had heard about Snack after researching lunch spots in Soho and so we decided to try it. Bottom line is that it ROCKS!! Very cool, little, cozy spot with about 5 or 6 small tables. The food is amazing if you like Mediterranean and we love it. The lamb sandwich is off the charts for flavor and taste. Check this place out…	0	Positive	['nyc', 'jan', 'san francisco', 'snack', 'lunch spots', 'soho', 'bottom', 'rocks', 'cozy spot', 'small tables', 'mediterranean', 'lamb sandwich']
1088	0	4	41192	Alright, alright, alright, alright. Alright, you close at 10pm something. Alright, I walk through a residential apartment hall to get to the restroom. Alright, dinner is a touch pricey. Alright, you're parking me into my table. S'aaaaaalllllll okay--- BECAUSE YOU ARE FUCKING DELICIOUS. And fucking cozy. And I admire your fucking integrity for making absolutely everything on site. THE GREEK SUN, I…	0	Negative	['alright', 'alright', 'alright', 'residential apartment hall', 'alright', 'touch pricey', 'alright', "s'aaaaaalllllll", 'because you are fucking delicious', 'the greek sun', 'your mountain', 'serious dollap', 'wildflower honey', 'rich girl ...', "'d marry", 'snack', "'s platter", 'have', 'snack', "'s portions"]
1089	0	4	41007	Greek soup buttery, milky chicken broth with lemon Oh my God.....BEST SOUP&UNIQUE I'VE EVER HAD IN MY LIFE@@ chicken sandwhich is great too. But expensive..especially the greek salad was dame small. But thinking about their rent in Soho ..maybe I have to understand.	0	Negative	['greek soup buttery', 'milky chicken broth', 'oh', 'god', '... ..best', 'soup', 'unique', 'ever had in my life', '@ @ chicken sandwhich', 'greek salad', 'soho']
1090	0	5	41528	Wow. I would leave my review at that if people didn't think I was being sarcastic or facetious. I rocked out with the Chicken 1.7 which was by far one of the best sandwiches I have had in 2008. All of the ingredients worked so harmoniously that I nearly sang along with it. If you are down in SoHo and want something awesome and made with care...check this place out. Wow.	0	Positive	['wow', 'soho', 'care ... check', 'wow']
1091	0	5	41509	Amazing - great place for lunch. Food is sooo delicious and well worth the little wait for a seat in a cramped space.	0	Positive	['amazing', 'great place', 'sooo delicious']
1092	0	4	40742	Yummers! I accidentally passed by it because it is such a tiny little place with only four two-persons tables. Ã‚Â Surprisingly, the food is incredibly tasty and rich in flavor (but not over powering). Ã‚Â I had the special ground beef stuffed egg plant and my friend had a fish dish. Ã‚Â Holy cow, we were both so happy with our own dishes and tasted each other's dishes too. Ã‚Â If I lived in NY I…	0	Positive	['yummers', 'tiny little place', 'two-persons tables', 'surprisingly', 'special ground beef', 'egg plant', 'fish dish', 'holy cow', 'ny', 'frequent stops']
1093	0	4	41472	Delicious! Ã‚Â I got the lamb sandwich with no onions. Ã‚Â The bread was slightly toasted, but not at all hard. Ã‚Â The lamb itself was juicy and a bit too chewy for my taste, but still very good. Ã‚Â The sauce was tomato-y and somewhat spicy. Ã‚Â The entire thing was $9.75, and it was large enough to fill me up. Ã‚Â As others have said, the place is very small, so there's a good chance that you …	0	Positive	['delicious', 'lamb sandwich', 'entire thing', 'good chance', "wo n't", "'re planning"]
1094	0	4	41352	Snack completely lived up to the yelp reviews. Ã‚Â Adorable tiny place with just a few tables, and a moderate sized menu and lots of nice light things to choose from. The tzanziki was creamy and garlicky, the eggplant dip so fresh, GREAT strong greek olives, a small greek salad (god i hate giant salads, who eats that much salad?) some spanikopita, and it was all good. Ã‚Â I was bummed that they w…	0	Positive	['snack', 'yelp reviews', 'adorable tiny place', 'nice light things', 'eggplant dip', 'great', 'strong greek olives', 'small greek salad', 'god i', 'giant salads', 'greek coffee', 'cuz']
1095	0	4	40912	Tasty, not cheap enough for what it is. You can get a good sandwich to go for only a lot of money (rather than a ton), and it will be fresh and yummy. Ã‚Â If you are willing to travel for Greek, go to Kefi. Ã‚Â If you want a fresh cucumber sandwich in Soho, come here.	0	Positive	['tasty', 'good sandwich', 'kefi', 'fresh cucumber sandwich', 'soho']
1096	0	4	41410	Grabbed a late lunch while shopping in Soho on Friday afternoon... Made the mistake of ordering pre-frozen spanakopita... Pucker-faced on sour, mint-less lemonade... Rejoiced with lamb and chicken sandwiches on super-chewy bread!	0	Negative	['grabbed', 'late lunch', 'soho', 'afternoon ...', 'made', 'pre-frozen spanakopita ...', 'pucker-faced', 'mint-less lemonade ...', 'rejoiced', 'chicken sandwiches', 'super-chewy bread']
1097	0	4	41585	We went to snack for sandwiches, although their pies looked really good, too. The sandwiches were yummy. They are served on bread which has a crusty outside and a nice chewy inside. It's delicious, but can be difficult to bite through in a sandwich. The hummus was not at all bland and was served with freshly baked pitas. I also got the mint lemonade. The lemonade was perfect: not too sour, not to…	0	Positive	['nice chewy', "'s delicious", 'mint lemonade', 'great lunch spot', 'lots', 'vegetarian options', 'credit card minimum']
1098	0	5	41685	This is one of my favorite Greek places in the city. There are only a couple of tables here but if they are full they take your cell phone and call you when a spot opens up. The food and service is great.	0	Positive	['favorite greek places', 'cell phone']
1099	0	4	40729	Loved the food! Ã‚Â I went mid-afternoon so it was not crowded and it was a very pleasant, mellow experience. Ã‚Â The chicken lunch special was delicious and just as good as I've had in Greece. Ã‚Â Yummy!	0	Positive	['loved', 'mellow experience', 'chicken lunch', 'greece', 'yummy']
1100	0	4	41642	Snack is absolutely adorable. It's just a tiny place with a handful of tables, with benches outside to sit and wait (good place to people watch). I used to frequent this place much more often because I had a dreary little job and it was in walking distance from said job. It was my little respite away from the office. I was happy to see that it hadn't changed one bit. It was still as delicious as …	0	Positive	['snack', 'tiny place', 'good place', 'casual lunch', 'portion sizes', 'grape leaves', 'sandwiches', 'snack', 'eat']
1101	0	3	40895	Very cute and romantic- made the mistake of coming with a friend. Seems like a place that should be for dates only. They were out of a lot of things I would have liked to have. The skordalia was good but tiny for the price. The veal meatballs were excellent and filling. I bet the sandwiches are good, but they weren't available for dinner (I don't think... ) Bathroom situation is really odd... you…	0	Positive	['seems', 'veal meatballs', 'bathroom', 'odd ...']
1102	0	5	40830	After an iPhone ordeal, my girlfriend and I felt the need to treat ourselves to something small, tasty, elegant, filling and fun. Ã‚Â This was definitely what we found. Ã‚Â Though it's small, the food is amazing and the service is professional but laid back. Ã‚Â Our server made fun of the beer names and casually joked with us. Ã‚Â We sampled the to-die-for soup with a couple of beers, she had the…	0	Positive	['iphone ordeal', 'beer names', 'to-die-for soup', 'amazing apps', 'taste buds', 'no longer', 'major cards']
1103	0	5	41579	Authentic! My Father is as Greek as they come. This place mirrors his ingredients and yummy flavor combinations. When I eat the Greek Salad (Cucumber, Feta, Onion, Tomato, Olive Oil, Oregeno, Etc) I am transported to my backyard as a kid - eating summer dinner with the family. It is very tiny & Cash Only. I find it easy to go here right after work to get a table w/ friends. You will not be dissap…	0	Positive	['authentic', 'father', 'place mirrors', 'yummy flavor combinations', 'salad', 'cucumber', 'feta', 'onion', 'tomato', 'olive', 'oregeno', 'etc', 'summer dinner', 'cash', 'table w/ friends', 'greek food', 'manhattan']
1104	0	4	41875	Ideal for ordering out, Snack offers delicious, um, I-cant-spell-it-lemony-chicken-with-little-pasta soup as well as quality tzaziki and hummus. Ã‚Â Recommend sharing the cold aps with a friend, though, as they give you quite a lot. Ã‚Â Not pricey but not cheap - still, a solid choice for a tasty work-day snack.	0	Positive	['ideal', 'snack', 'i-cant-spell-it-lemony-chicken-with-little-pasta', 'quality tzaziki', 'recommend', 'cold aps', 'solid choice', 'tasty work-day snack']
1105	0	3	41281	My boyfriend and I went to Snack for Lunch today. The waitress seemed really stressed waiting the 5 tables that were inside and so the service was a bit slow. I had a cherry juice and he had a frappe- both good, though I'd recommend the latter. Each entree came with a "mezze" or appetizer. We ended up with a pie off the specials which was wonderful, stuffed tomatoes and peppers (good, light, a bi…	0	Positive	['snack', 'lunch', 'cherry juice', 'bit bland', 'feta salad', "i 've", 'pita', 'extra dollar', 'overall', 'tiny bit', 'nice view']
1106	0	5	41679	Snack is one of the places I miss most about previous days I lived in NY...you just can't find vegetarian souvlaki like this in Denver. I make a point to stop here every time I get back to visit. It is great for take out lunch, although a little small for dinner (even by NY standards)	0	Positive	['snack', 'previous days', 'ny', "ca n't", 'vegetarian souvlaki', 'denver', 'ny']
1107	0	3	40892	Pros: Ã‚Â The food is actually very good Cons: Ã‚Â Someone who doesn't drink wine or any alcohol for that matter must have picked the wines on that list... I don't see how it could be any other way. Ã‚Â We ordered a bottle of white and I swear it tasted like someone poured out half the bottle and refilled it with Milwaukee's Best or Natty Lite. Ã‚Â Also, the service was not very good or pleasant,…	0	Positive	['pros', 'cons', 'someone', "n't drink wine", 'list ...', 'milwaukee', 'natty lite', "ca n't", 'entire restaurant']
1108	0	4	41186	Cool place for a quick bite to eat Ã‚Â ($$ - decently cheap) if they have space (they only have like 5 super small tables in a row). I got the chicken and potatoes special which was excellent. Their hummus was okay, but not great. The place is small so don't expect to have a private lunch here... Definitely a perfect spot for a little shopping sustenance.	0	Positive	['cool', '$ $', 'super small tables', 'private lunch', 'definitely', 'perfect spot']
1109	0	4	40835	this place is tiny so getting seat can be a feat. Ã‚Â if you are lucky, get some mint lemonade. Ã‚Â it's nice. Ã‚Â i got the portobello and roasted red peppers sammy on cibatta. Ã‚Â it was good, but drippy. Ã‚Â it did the i'm taking a bite the contents are squishy out. Ã‚Â i still enjoyed it despite the falling apart bit. Ã‚Â felt like the waitress was rushing us out, but could understand with pe…	0	Positive	['mint lemonade', 'Ã¢ i', 'red peppers sammy', "i 'm", 'Ã¢ i', 'combo platter', 'pita galore']
1110	0	5	41809	I was visiting NY and I told my friend to pick a place that she'd never been, Ã‚Â and lucky for me, she chose Snack. There are only about five tables in the entire restaurant - I actually couldn't believe we got a table without a reservation, but it all worked out. My friend is Greek, Ã‚Â and grew up eating Greek foods, so she ordered our food. We had the most amazing cheese triangles and the egg…	0	Positive	['ny', 'snack', 'entire restaurant', 'greek foods', 'amazing cheese triangles', 'lamb dish', 'overall', 'perfect experience']
1111	0	5	41687	Ok, I admit it. Ã‚Â I've never been a huge fan of Greek food. Ã‚Â I'm reminded of this place in Minneapolis, It's Greek to Me -- and eating this really, really REALLY tough octopus appetizer there. Ã‚Â I don't remember any other dishes there, though I ate their several times in high school in an attempt to be cool by going "downtown" or Uptown (yes, as in the Prince song too). Snack changed my mi…	0	Positive	['ok', 'huge fan', 'greek food', 'minneapolis', 'really', 'tough octopus appetizer', 'high school', 'uptown', 'prince song', 'snack', 'creamy', 'cucumber tsatsiki', 'savory', 'veal meatballs', 'flaky', 'spinach pies', 'oooooooh']
1112	0	4	40860	Ducked into this extremely small space (a tiny storefront on Thompson) on a rainy Tuesday afternoon and scored the last table (out of maybe 5 or 6) and had a very filling, very good lunch. The highlight was the butter bean salad ($8), a generous helping of large butter beans over a bed of arugula and topped with a lemon vinagrette. The well-reviewed lamb sandwich ($9) was HUGE (you can split this…	0	Positive	['ducked', 'small space', 'tiny storefront', 'thompson', 'good lunch', 'butter bean salad', 'large butter beans', 'lemon vinagrette', 'lamb sandwich', 'huge', 'eyeing', 'tuna sandwich', 'late lunch', 'otherwise']
1113	0	4	40863	I actually missed this place even after I read another Yelp review warning me I would miss it and resolved not to! This dark slice of a restaurant has no bold lettering or color to catch you but doubletrack, search and hunt until you find it because the experience is WONDERFUL. First of all, you are really squeezed with exactly 8 other people, if you only came with one person. And I recommend you…	0	Positive	['yelp', 'review warning', 'dark slice', 'wonderful', 'anyway', 'lamb sandwich', 'yelpers', 'perfect foil', 'kashkaval', 'meze', 'white beans gigantes', 'lamb sandwich', "ca n't"]
1114	0	4	41305	Literally a hole in the wall, but delicious food. Try the veggie moussaka, the hummus...really, anything. Probably have a better chance of getting food if you do takeout instead of trying to get a seat, as I doubt that it has more than 10 chairs, but it's worth the wait.	0	Positive	['literally', 'delicious food', 'try', 'veggie moussaka', 'hummus ...', "'s worth"]
1115	0	5	41598	One of my supervisors recommended this place to me. I walked passed the place twice (very unassuming, small door). Once inside, I was surprised to discover that the space underneath my bed was bigger than this establishment. Good thing I was just picking up my order. So I got the greek salad with the chicken bourlaki (doubt I spelled that correctly). Whoa, this stuff tastes great. Probably the be…	0	Positive	['small door', 'space underneath', 'good thing', 'greek salad', 'chicken bourlaki', 'whoa', 'stuff tastes', 'greek salad', 'lamb sandwich', 'm-azing', 'definitely', 'ruff ...', 'tip', "'s ok", 'otherwise']
1116	0	5	41323	perfect lunch spot when you want something light and fresh and pretty. Ã‚Â I had the artichoke chicken salad and it had beans in it the size of my brain. Ã‚Â Have you ever had a mouth full of bean? Ã‚Â It's fantastic! Ã‚Â The bigger then bean, the better. Ã‚Â I'm totally coming here for dinner one night after work for sure.	0	Positive	['perfect lunch spot', 'artichoke chicken salad', 'have']
1117	0	5	41372	my big fat greek lamb sandwich. took my visiting cousin from chicago here after she had done time at some of ny's fancier establishments and was in the market for some real food.. Ã‚Â Ã‚Â braised lamb that falls apart. Ã‚Â ciabatta-esque bread. Ã‚Â arugala. Ã‚Â get it.	0	Positive	['big fat greek lamb sandwich', "ny 's fancier establishments", 'real food.. Ã¢ Ã¢', 'Ã¢ ciabatta-esque bread', 'Ã¢ arugala']
1118	0	4	40739	I gotta say, I was very impressed with Snack. Ã‚Â How did I not know of this place sooner? Ã‚Â Oh wait...I know. Ã‚Â 'Cause it blends into Thompson St. so well that unless you know where it is, you can easily walk right by it! Ã‚Â Spurred by Sam and Russ's reviews, I decided to spice up my lunch routine and grab a takeaway from Snack. Ã‚Â Quick service, small location, GREAT food. Ã‚Â I tried the…	0	Positive	['snack', 'oh', "Ã¢ 'cause", 'thompson', 'spurred', 'sam', 'russ', "'s reviews", 'snack', 'quick', 'small location', 'great', 'lamb', 'prince st.', "soggy 'cause", 'lamb juice drippings']
1119	0	5	41848	Yogurt place ll - not Snack also on ....71 Sullivan Street (between Prince St & Spring St), New York, NY 10012 Why is this place so cute? I never knew yogurt could be so this good. Located in Soho this little Greek boutique is hidden way on 71 Sullivan street btw Prince and Spring. This little shop is full of all thing Greek, from cookies, baklava, spinach & cheese pies and of course homemade Gre…	0	Positive	['yogurt', 'place ll', 'snack', '... .71', 'sullivan', 'st', 'st', 'york', 'ny', 'located', 'soho', 'little greek boutique', 'sullivan', 'street btw prince', 'little shop', 'cheese pies', 'course homemade', 'greek yogurt', 'originally', 'elmhurst queens', 'manhattan', '% cows milk yogurt', 'apricot syrup', 'afternoon snack', 'almond cookies', '$ .50', 'apricot cookie $', 'cheese pie', 'nice cool …
1120	0	3	41157	Yummy. I much prefer dinner to lunch. I've ordered take-out for lunch a few times and every single experience was sour. For some reason, the lunch crew is just not as friendly. Plus, the dinner menu is way better. Think it's worth mentioning that there are about 12 seats at this restaurant so prepared to wait if you go during a popular dining time. All in all, it's a cute little place for a relax…	0	Positive	['yummy', 'lunch crew', 'dinner menu', 'think', "'s worth", "n't fussy"]
1121	0	5	41733	So yeah, you all know the fighting over the lunch place story. Ã‚Â Clearly great Yelp minds think alike. Ã‚Â The owners of this place and Snack Taverna on Bedford have the modern Greek cuisine down pat! Ã‚Â The lamb sandwich is epic and divine, the atmosphere is adorable, the service was fantastic, and the mint lemonade was expertly crafted (you'd think Mint + Lemonade + Sugar would be an easy co…	0	Positive	['lunch place story', 'clearly', 'yelp', 'snack taverna', 'bedford', 'lamb sandwich', 'mint lemonade', 'mint', 'lemonade', 'sugar', 'easy concoction', 'basically', "ca n't", 'others drool']
1122	0	4	41062	After a lengthy debate with my local hosts about where to dine for lunch, after ruling out a relatively local place known for it's Mediterranean style food and especially its lemon chicken orzo soup, it was settled that we'd go to a different spot because it had rockin' sandwiches. Along for the ride, I said, hey, why not? Ã‚Â You're the boss. Ã‚Â (A figure of speech. Ã‚Â Literally.) So, imagine …	0	Positive	['lengthy debate', 'local hosts', 'local place', 'mediterranean', 'style food', 'lemon chicken orzo soup', 'different spot', 'literally', 'lamb entrees', 'lemon chicken orzo soup', 'wtf', 'well', 'snack', 'lamb sandwich', 'nyc', 'super cute', 'prime time', 'oh', 'fresh lemonade', 'warm day', 'russ', 'ha']
1123	0	4	41577	I went here for lunch the other day with a coworker and it was great. Ã‚Â I had the chicken sandwich (chicken, tomatoes, roasted red onions, spicy mint lemonaise, arugula and mint), which may be the best damn chicken sandwich I've had. Ã‚Â My coworker seemed very pleased with his Greek salad/meat pie-ish thing. Ã‚Â The items on the menu largely consist of your more popular Greek choices (spanakop…	0	Positive	['chicken sandwich', 'red onions', 'spicy mint lemonaise', 'damn chicken sandwich', 'greek salad/meat pie-ish thing', 'popular greek choices', 'small place']
1124	0	5	41510	I lived on spring street for 3 years, basically around the corner from Snack. In that time I developed a strong addiction to snack's chicken sandwich on the lunch menu (among other menu items, but the chicken sandwich was my fave). I was getting snack delivery at least once a week and the delivery guy and I became very close (kidding). Anyways, what I am getting at is that I like this place. You …	0	Negative	['spring street', 'snack', 'strong addiction', "snack 's chicken sandwich", 'lunch menu', 'menu items', 'chicken sandwich', 'snack delivery', 'delivery guy', 'anyways']
1125	0	5	40853	I squeezed into this place seeking something healthy and hearty for lunch. Ã‚Â I noticed a "specials" chalkboard with chicken and roasted vegetable salad scribbled on it and decided to give it a shot. I sat on the benches outside and waited. Ã‚Â After a little while I was presented with a little white box that I couldn't wait to open once I got back to the office. .....Wow! A moist chicken breast…	0	Positive	['vegetable salad', 'white box', '... ..wow', 'moist chicken breast section', 'bell peppers', 'large feta croutons']
1126	0	4	40830	Ever since I studied in Greece, I have always looked for a decent Greek place no matter where I happen to be traveling. Now that I live in NYC, I had been pretty disappointed in terms of finding a quick, tasty and legitimate Greek menu. Sure, you could go to Thalassa or the like to have a real sit-down meal, but what about the quick occasions that you need something hearty and fast? Greek usually…	0	Positive	['ever', 'greece', 'decent greek place', 'nyc', 'legitimate greek menu', 'sure', 'thalassa', 'real sit-down meal', 'quick occasions', 'cozy', 'greek menu', 'greek beers', 'mythos', 'went', 'garlic potato puree', 'warm chicken pie', 'deliciious eggplant', 'ground sirloin', 'bechemel sauce', 'huge', 'greek cooking', 'reasonable prices', 'good service', 'good atmosphere', 'quick snack', 'soho', 'rom…
1127	0	4	41727	i've only tried the sandwiches here, and the hummus (mmmm). everything tastes fresh, light but filling, and actually healthy! the sandwich bread is a bit crunchy and not as soft as most breads but it doesnt leave that soft bread gunk stuck in your teeth feeling, which i hated back when i wore braces. minus one star because there are only 5 two-seater tables so most of the times i came here, they …	0	Positive	["i 've", 'sandwich bread', 'bit crunchy', 'soft bread gunk', 'teeth feeling', 'two-seater tables', 'times i', 'perfect cozy place']
1128	0	5	40924	I live for this place. Ã‚Â It feeds me lunch at least twice a week, and never once has it let me down. Ã‚Â A few highlights: the lamb sandwich; the artichoke/chicken salad; any variation of the pikilia (three cold mezes). Ã‚Â Everything is fresh, staff are friendly, and the food is without rival. Ã‚Â These kinds of places make food in New York the best!	0	Positive	['lamb sandwich', 'artichoke/chicken salad', 'cold mezes', 'york']
1129	0	5	41565	I Snack on a weekly basis and it's always the same: spinach pie with a side of eggplant mush. Then a squidgen of lemon followed by a "don't bother me, I'm eating". Round off the experience with a handful of jordan almonds. Truly one of the best meals in soho.	0	Positive	['snack', 'weekly basis', 'spinach pie', 'eggplant mush', "n't bother", 'jordan almonds', 'truly']
1130	0	5	41659	Snack is the happy tasty, the warm and wonderful, a delicious restaurant with lots of vegetarian options. Less abstractly, it's a tiny, tin-ceilinged, ten-seater Greek restaurant, Ã‚Â with a great menu of mezze -- think of it less as a gyro stand, and more as an upscale but homey small plates restaurant. I wish I remembered the names of the dishes better, but there was a cheese and tomato salad t…	0	Positive	['snack', 'happy tasty', 'delicious restaurant', 'vegetarian options', 'less', 'greek restaurant', 'great menu', 'gyro stand', 'small plates restaurant', 'tomato salad', 'white bean', 'date ...', "'d run", 'baklava']
1131	0	5	41880	Their spinach triangles cannot be beat. The Greek salad is also wonderful. If it's hot out, don't miss the mint lemonade. On a sunny day, have the folks at Snack pack your lunch to go and sit at one of the tables in the nearby park. UPDATE 1/2007: Don't miss the pastitsio!	0	Positive	['spinach triangles', 'greek salad', 'mint lemonade', 'sunny day', 'snack', 'nearby park', 'update']
1132	0	4	40870	Cozy little Greek place. Ã‚Â Love the meze! Ã‚Â Highly recommend the skordalia (potato garlic puree) and the tzatziki (cucumber yogurt dip). Ã‚Â They also have all the traditional dishes when you think of Greek food - spanakopitakia, spinach pie, pastitsio and mousaka. Ã‚Â Don't forget the Greek desserts - yogurt (with honey, of course), halva and baklava.	0	Positive	['cozy', 'greek place', 'love', 'highly', 'potato garlic puree', 'cucumber yogurt dip', 'greek food', 'spinach pie', 'greek desserts']
1133	1	1	40925	My wife and I took my parents there for lunch and were greeted by stares from the staff with no greeting whatsoever despite there being only five people in the entire place. This was followed by a rude, abrupt waitress who acted like we had to speed talk to place an order. To cap off this wonderful experience, the pizza was non descript and Ã‚Â the pasta tasted like it had been ordered from a din…	1	Positive	['greeting whatsoever', 'entire place', 'abrupt waitress', 'wonderful experience', 'non descript', 'wo']
1134	1	1	41047	Got a margarita pizza. First off let me say very expensive that one pie came out to 25$ with 2 simple toppings on it. Secondly the was a piece of hair in it. Ã‚Â Also the sauce was bland. My table was all oily. Definitely not recommending this place might as well go down the block to Tommys. Again HORRIBLE.	1	Negative	['got', 'margarita pizza', 'simple toppings', 'secondly', 'definitely', 'tommys', 'horrible']
1135	1	2	41460	The food is average pizzeria and not cheap. Ã‚Â Add that to the fact that I puked my guts out in the bathroom during the "meal" and I've decided not to go back.	1	Negative	['average pizzeria']
1136	1	2	41417	I can not fathom why people would give this restaurant more than a star or two. I'm starting to find Yelp reviews unreliable. This was our first time ordering from Peppino's and we will never eat their food again. Overpriced for the quality. I gave one star for prompt delivery and one star because the food wasn't horrible. It was just bad. Their bread is tasteless- this goes for their crust and g…	1	Positive	['yelp', 'peppino', 'overpriced', "n't horrible", 'garlic crisps', 'flavor whatsoever', 'plain pizza', 'marina sauce', 'tastes burnt', "penne a'la vodka", 'eggplant parm roll', 'good pizza', 'ave', 'brooklyn', 'villa', 'amazing pasta']
1137	1	3	41110	Went here during the time it was busy and i got a regular slice. When i received it, it was just warm.... i rather have my pizza hot, but maybe its just because it was busy but still...	1	Positive	['went', 'regular slice', 'warm ...']
1138	1	3	41101	never lets me down!!!!!! If you order a lot you can def. rack up a bill but let me tell you it is worth it! I would just like waitresses that are little Ã‚Â more "with it". Other than that.. the BEST pizza ever!!!	1	Positive	['best']
1139	1	3	40846	Pizza was not bad, however not great either. Prices are reasonable. Ã‚Â I think they can work on there service.	1	Positive	['pizza', 'prices']
1140	1	3	41280	Peppinos is far superior to your typical neighborhood slice shop but it isn't a destination pizza place. The staff is friendly to a fault, which almost makes up for the errors in their food. 2 out of the last 3 times that I've ordered pies from them, they have put the wrong toppings on the pies. I'm not a picky guy but it is annoying when you are paying $20 + for a pizza. I'm not sure what the is…	1	Positive	['peppinos', 'typical neighborhood slice shop', 'destination pizza place', 'wrong toppings', 'picky guy', 'delivery', 'delivery time', 'pepperoni hero']
1141	1	4	40716	Solid place good pizza	1	Positive	['place good pizza']
1142	1	4	41313	I am impressed with this place. I love pizza, but Solid oven pizza was my frist time to try. Amazing and delicious. It 's one of my best pizza experience of NYC! I can't wait to go back for more. (after I missed NYC's Biggest Pizza Party)	1	Positive	['oven pizza', 'frist time', 'amazing', 'pizza experience', 'nyc', "ca n't", 'nyc', 'biggest pizza']
1143	1	4	40784	Cute little spot very old school feeling. Theyve got brick oven pizza which is always a plus. But if your not ordering a whole pie sometimes the pizzas hit or miss. The bruschetta, the diavolo, these are not. they are always spot on and delicious. get a pizza as an app for the table if youve got a group and then chow down on their actual dishes. good stuff.	1	Positive	['cute', 'old school feeling', 'theyve', 'brick oven pizza', 'whole pie', 'good stuff']
1144	1	4	41155	This restaurant helped me planned a last-minute birthday party for my daughter after another place cancelled at the last minute. Pizza was crisp and delicious and the waitstaff were patient with a room full of 9 y/o's. It's not fancy or gourmet; it's just honest pizza and god service at a fair price.	1	Positive	['last-minute birthday party', 'pizza', "y/o 's", 'honest pizza', 'god service', 'fair price']
1145	1	4	41082	The quattro stagioni reminds me of great pizzas from my childhood. I highly recommend this place for delivery.	1	Positive	['quattro stagioni reminds', 'great pizzas']
1146	1	4	41295	I order from this place at least twice a week. There ceaser salad is great!!!, comes with amazing garlic crisps which are so yummy! I come here frequently for dinner also with my 2 kids & they are very accommodating! No weird faces when you have to seat a stroller & a highchair! Thx for your good food & good manners!	1	Positive	['ceaser salad', 'amazing garlic crisps', 'thx', 'good food', 'good manners']
1147	1	4	41120	Wonderfully delicious pizza! One of my favorite places to go in Brooklyn.	1	Positive	['wonderfully', 'delicious pizza', 'favorite places', 'brooklyn']
1148	1	4	41626	Pretty good cheesesteak subs. Pizza from a brick oven: a plus. Good service too.	1	Positive	['pretty good cheesesteak subs', 'pizza', 'brick oven', 'good service']
1149	1	4	41377	Nice atmosphere and good service. They have a great menu for everyone. Crispy pizza and good taste.	1	Positive	['nice', 'good service', 'great menu', 'crispy', 'good taste']
1150	1	5	41509	Amazing food! I went with a friend and had one of their daily specials with seafood and red sauce. It was out of this world. The portion lasted me for the next day's lunch. Nice, friendly stuff. Overall good experience. Will go back and would recommend it to friends.	1	Positive	['amazing', 'daily specials', 'red sauce', "day 's lunch", 'nice', 'friendly stuff', 'overall', 'good experience', 'will']
1151	1	5	41256	Peppinos surprised me quite a bit. I wasn't sure what to think of the place when I first walked in but the atmosphere was warm and inviting. I sat down and had a Margarita Pie and it was to die for! Just the correct amount of sauce to cheese ratio, it came to our table piping hot and the sauce wasn't overly sweet which is a pet peeve of mine. I can't wait to go back and try some of the steak sand…	1	Positive	['peppinos', 'margarita pie', 'correct amount', 'cheese ratio', 'pet peeve', "ca n't", 'steak sandwiches']
1152	1	5	41129	Manager was extra helpful and friendly. Food was delicious. Place was nice and clean.	1	Positive	['extra helpful']
1153	1	5	41718	Great pizza! My go to place when I want something that hits the spot. They use all fresh ingredients and they are very generous with their pizza topping . Def check them out if you haven't already .. You won't be disappointed	1	Positive	['great pizza', 'fresh ingredients', 'def', "wo n't"]
1154	1	5	41034	Pricey but great Italian food! Best around!	1	Positive	['pricey', 'great italian food']
1155	1	5	41086	This probably one of my top 10 favorite restaurants! I order the ravioli and it was amazing! The marina sauce was the best, Homemade and delicious. Though I recommend coming in hungry because it fills you up and portion are kinda big. It was a like I was in Italy and the atmosphere is very laid back. Ã‚Â Definitely A must if your visiting New York!	1	Positive	['favorite restaurants', 'marina sauce', 'homemade', 'italy', 'definitely', 'york']
1156	1	5	41762	Great place, great food. I have in both Brooklyn locations and have almost enjoy a good meal.	1	Positive	['great place', 'great food', 'brooklyn', 'good meal']
1157	1	5	40904	I rarely comment about my experiences at restaurants but needed to take the time to thank Peppinos for the truly amazing food and excellent service!!!! Ã‚Â The Bruschetta is a must have so so yummy {trust me}. Ã‚Â My main meal of Penne a la vodka was unforgettable. Ã‚Â My Hunny had the Philly Cheese Steak which of course I needed to try, it was incredible, needless to say no more driving to Phila…	1	Positive	['peppinos', 'amazing food', 'excellent service', 'bruschetta', 'yummy { trust', 'main meal', 'penne', 'hunny', 'philly cheese', 'philadelphia', 'pricing', 'unprofessional jerk', 'dinner service making tons', 'kiddos', 'peppinos', 'enjoy', 'family restaurant values', 'we will be back often']
1158	1	5	40726	Both spots are great I believe there's one in Park Slope and one in Bay ridge. Both places make great brick oven pizza. Def got my stamp of approval 5 star! all day every day. Margherita pizza is really good at Peppinos you will savor every bite. They even deliver pretty far. So if your in the Ft Greene area and your in the mood for some pizza give these guys a call.	1	Positive	['slope', 'bay ridge', 'great brick oven pizza', 'def', 'margherita', 'peppinos', 'ft greene']
1159	1	5	40604	Enjoyed the pizza . Very fresh and flavorful. Worth the wait.	1	Positive	['enjoyed', 'worth']
1160	1	5	41296	My husband and I visit Peppinos once a week and always enjoy the food. Ã‚Â I just wanted to let everyone know what type of people they are. Ã‚Â I know a neighborhood girl that married and moved to Breezy Point to raise her 5 children and has recently been displaced because of Hurricane Sandy. Ã‚Â When I mentioned it to one of the owners of Peppinos they immediately invited the intire family for d…	1	Positive	['peppinos', 'neighborhood girl', 'breezy', 'hurricane sandy', 'peppinos', 'intire family', 'real family', 'neighborhood people', 'god bless', 'good thing']
1161	1	5	41514	I think it is a family run business which makes it even better in my book. The pizza is fantastic here and the service is always great. The vodka sauce and garlic crisps are real good too!	1	Positive	['family run business', 'vodka sauce', 'garlic crisps']
1162	1	5	41610	Let me start with I've only every had their delivery... that being said, they're super fast, super nice, and super DELICIOUS! Ã‚Â The vodka pie is honestly amazing. Ã‚Â A little too good, like, "I'm already really full, but I should probably have just one more slice," good. Ã‚Â A large isn't a "huge" pie, but with how good it is take that as a saving grace! Ã‚Â I definitely recommend :)	1	Positive	['delivery ...', 'delicious', 'vodka pie']
1163	1	5	41663	This place is pretty close to perfect. Ã‚Â Amazing brick oven, wood fired pizza, incredible heros made with homemade, amazing dough. Ã‚Â Sauce is fresh, barely touched using great products. Ã‚Â Incredibly warm and nice staff both in person and on the phone. Ã‚Â This isn't a complaint but a request.... I wish they had a few more appetizer choices, i think they could do a really good fried mozzarel…	1	Positive	['amazing', 'brick oven', 'incredible heros', 'amazing dough', 'sauce', 'great products', 'incredibly', 'nice staff', 'request ...', 'appetizer choices', 'mozzarella app', 'clam pizza', 'great pizza restaurants', 'keep', 'peppinos']
1164	1	5	41665	Okay, here It is. Went to Grimaldi's and the line was way too long. Yelped a few places and found reviews for Ã‚Â Peppino's. Read a review about the place and decided to take my party of five to Park Slope. WOW. We started with bruschette and a mozzarella appetizer. Then we got some pizzas and pastas. Vodka and margerita pie were amazing. Fusilli were amazing and i really enjoyed the orecciette p…	1	Positive	['okay', 'went', 'grimaldi', 'yelped', 'peppino', 'read', 'slope', 'wow', 'mozzarella appetizer', 'vodka', 'margerita pie', 'fusilli', 'orecciette pasta dish', 'quality food', 'rite price', 'peppino', 'new spot']
1165	1	5	41039	We have lived in Park Slope for three years and only now FINALLY have found a pizza place we love. Since we live about 14 blocks away, I hadn't realized they would deliver to us, but it was no problem. We ordered six large pizzas for a party (Margheritas and Diavolas), and the staff was incredibly friendly, responsive and right on time. Sometimes delivered pizza isn't so good, but this was still …	1	Positive	['slope', 'finally', 'pizza place', 'large pizzas', 'margheritas', 'diavolas', 'will']
1166	1	5	41168	Best pizza in the slope. There thin crust margherita pizza is delicious. The crust is crunchy and the sauce is perfect. A few slaps of fresh mozzarella and you have a great pie of pizza. It can be a bit pricey compared to some other pizzerias but you pay for quality so I don't mind not one bit.	1	Positive	['thin crust margherita pizza', 'fresh mozzarella', 'great pie', 'bit pricey', "n't mind"]
1167	1	5	41759	My husband has a love for brick oven pizza and when we found Peppino's on a weekend stroll through Park Slope he was in heaven. We ordered the Margherita pie well done (I don't like a soggy center) with extra fresh basil and it was DELICIOUS! Ã‚Â The crust was perfect not too thick or too thin, the sauce was flavorful and there was just enough fresh mozzarella that you didn't feel guilty eating a…	1	Positive	['brick oven pizza', 'peppino', 'weekend stroll', 'slope', 'margherita', 'soggy center', 'extra fresh basil', 'delicious', 'fresh mozzarella', 'whole pie', 'lunch spot', "ca n't", 'happy eating']
1168	1	5	41455	Seriously. Ã‚Â I want to sew my *** shut so it would never leave me. Ã‚Â This place has the best pizza ever. Ã‚Â It's a weekly favorite at my apartment! Ã‚Â I've only had delivery, never been there.... but wow! Ã‚Â Get a large pie with peperoni, ham, sausage and mushroom. Ã‚Â Mmmm	1	Positive	['seriously', '*** shut', 'large pie', 'mmmm']
1169	1	5	40649	Best Pizza in Brooklyn. I tried others and I have to say that they don't even come close. Cheesesteaks are great and the pasta dishes are real deal. Love this place.	1	Positive	['pizza', 'brooklyn', 'cheesesteaks', 'love']
1170	1	5	41223	Quite simply, the most delicious pizza you'll get in the slope. Whether a slice or a pie, it's an amazing taste sensation to rock your world!	1	Positive	['delicious pizza', 'whether', 'amazing taste sensation']
1171	1	5	40903	I moved about a block away from Peppino's, and it quickly became my go to place for when I want a tasty margherita pizza. Ã‚Â The atmosphere is comfortable inside, the waitstaff (er, waitress - it's been the same woman every time I've been) is incredibly nice, and the bruschetta is to die for. Ã‚Â Seriously - my wife (a phenomenal cook) has been trying to replicate it at home, but something about…	1	Positive	['peppino', 'tasty margherita pizza', 'seriously', 'phenomenal cook', 'caesar', 'small margherita pizza', 'street pizza joint']
1172	1	5	41854	WOW. I love the Margaretta pizza!, Thin crust crunchy, full of flavor its amazing but it doesn't end there. The past dishes are amazing, and the best thing about it is you can order specials and they will make it for you. The fish specials and the Baked clams are full of flavor and SO FRESH. When i walked into this place i was expecting a pizzeria what i got was a full on Italian gourmet restaura…	1	Positive	['wow', 'margaretta', 'thin', 'crust crunchy', "n't end", 'fish specials', 'baked', 'so fresh', 'place i', 'italian', 'gourmet restaurant ...', 'pizza', 'margareta', 'best', 'different i', 'arugula pizza', 'pasta', 'fantastic', 'fresh mozzarella', 'balsamic vinegar..', 'mouth watering', 'baked clams', 'bruschetta', 'fan', 'life']
1173	1	5	40857	Best Margherita pizza I've tasted ever, anywhere. Ã‚Â The crust is thin and oven crisp, the mozzarella is fresh and delicious, and there are fresh basil leaves baked right on top. Ã‚Â Too delicious! Ã‚Â Fast local delivery too.	1	Positive	['margherita', 'oven crisp', 'fresh basil leaves', 'too', 'fast', 'local delivery']
1174	1	5	40946	Wow!!!! I was thoroughly surprised about this restaurant. The Penne a la Vodka was out of this world. I hear they have another restaurant in Bay Ridge. Wish there was one on every corner.	1	Positive	['wow', 'penne', 'vodka', 'bay ridge']
1175	1	5	40989	Excellent pizza, really friendly neighborhood place. Very generous portions for salad and pasta too -- and never a long wait for a table.	0	Positive	['excellent', 'friendly neighborhood place', 'generous portions', 'long wait']
1176	1	4	41222	Ate here last night, was able to get seated around 7pm immediately (there were 4 of us). I had a cappuccino with whipped cream and cinnamon which was delicious and warmed me up right away. The pizza was delicious as well! I forget the names, but I ordered a pizza with mushrooms, olives, ham, and artichokes - YUM! The crust was crunchy and I loved how I could really taste the smokey-ness from the …	0	Positive	['ate', 'yum', 'brick oven', 'back/order takeout']
1177	1	5	41116	Delicious food and great customer service! Will definitely return. We love getting the margarita pie with pepperoni and the kids love the penne vodka with chicken. Love this place. Top pizza joint in NYC.	0	Positive	['delicious', 'great customer service', 'will', 'margarita pie', 'penne vodka', 'love', 'top', 'pizza joint', 'nyc']
1178	1	3	40948	Good, not great. The pizza chef that deigns to use canned mushrooms commits the pinnacle of pizza heresy. Especially at $24.95 for a small (enough for two and leftovers), I expect someone to forage for even the most basic button 'shroom. Mellow about mushrooms, I am not. Other tasting notes: great crust, sauce on the watery side, quality sausage	0	Positive	['pizza chef', 'mushrooms commits', 'pizza heresy', 'especially', "basic button 'shroom", 'great crust', 'watery side', 'quality sausage']
1179	1	5	41625	Wonderfully authentic brick oven pizza. Nothing pretentious about this place. Great pizza, great staff, great experience. I wish more places got it like this place gets it. Best pizza in the neighborhood, but would be worth going the extra mile to get here if I didn't leave here.	0	Positive	['wonderfully', 'authentic brick oven pizza', 'great pizza', 'great staff', 'great experience', 'extra mile']
1180	1	5	40975	We get plain pizza most of the time, half with pepperoni. My wife is very picky when it comes to pizza and she's obsessed with how great a pie is. I'm also really into their eggplant rolls - probably the best I've ever had. If the pricing scares you away, I suggest making the splurge. Totally worth it.	0	Positive	['plain pizza', 'eggplant rolls', 'totally']
1181	1	5	40608	We love this pizza! Always delicious!!	0	Positive	[]
1182	1	5	41334	The Diavola pizza was absolutely amazing and the service superb. I will definitely make this my new local regular pizza spot.	0	Positive	['diavola', 'service superb', 'new local regular pizza spot']
1183	1	5	41418	Much needed review, this place is another awesome brick oven pizza place, good for a couple, or a sunday treat..fresh, yummy and Ã‚Â the food presentation is classy ,service good,would recommend.	0	Positive	['awesome brick oven pizza place', 'sunday treat..fresh', 'food presentation', 'service good']
1184	1	5	41391	Yelp did not lead me astray on this recommendation. The small pizza is huge. We did ours half and half - prosciutto & the blanca. Both were so good and totally what you want when you think NY pizza.	0	Positive	['yelp', 'small pizza', 'ny']
1185	1	5	41128	Came up to Brooklyn for the day to see a show, afterwards I just wanted somewhere quick, not too crowded, and that had beer available. Used Yelp to find this pizza joint. When we got there we ordered a round of drinks and a large Diavola. Took less than fifteen minutes for the pie to come out. Ã‚Â The pie itself was awesome, I didn't want to stop eating it. I was actually almost tempted to order …	0	Positive	['came', 'brooklyn', 'used yelp', 'pizza joint', 'diavola', 'took', 'thumbs', 'peppino']
1186	1	5	40835	This place serves the best good basic pizza in Park Slope. If you want a fancy pizza, go to Franny's but if you want good solid basic pizza, Peppino's is where you want to be.	0	Positive	['good basic pizza', 'slope', 'fancy pizza', 'franny', 'good solid basic pizza', 'peppino']
1187	1	5	41493	WOW. Ã‚Â We looked at restaurants on our GPS under Italian and this came up. Ã‚Â Walked in the smell would bring you to your knees. Ã‚Â PLUS they were playing Italian Opera. My boss said if it is half as good as it smells we are in for a treat. Ã‚Â Well it was better than that. Ã‚Â My boss is a pro with Philly steaks and Philly Hoagies and he had one that he said was a HOMERUN! Ã‚Â One of the bes…	0	Positive	['wow', 'gps', 'italian', 'walked', 'plus', 'italian opera', 'well', 'philly', 'philly hoagies', 'homerun', 'italian food', 'penne alla boscaiola', 'out of this world', 'italy', 'boston', 'york', 'scotland', 'san francisco', 'minneapolis mn', 'food quality', 'diamonds', 'plans whenever', 'near', 'tiny waitress', 'cool black glasses', 'tanya', 'try']
1188	1	4	40951	I've never eaten at their storefront but I have ordered from them a lot and still do if I'm Ã‚Â in the area. I'm not a big fan of brick oven pizza and never really had theirs so I can't really comment on the pizza but everything else they make from their heroes and rolls to the their pastas and salads are all on point. Their Philly cheese steaks are a bit salty but still among the Ã‚Â best I've e…	0	Positive	["'m Ã¢", 'big fan', 'brick oven pizza', "ca n't", 'philly', 'cheese steaks', 'bit salty', 'brooklyn']
1189	1	3	41505	I wish I could give this 3.5 stars, but I don't think it deserves 4. Good if not too acidic pizza. Everything else a little too rough around the edges. Very nice and attentive staff, they were very accommodating when we asked to exchange our dessert which was inedible (old and freezer burnt tasting amaretto ice cream).	0	Positive	['acidic pizza', 'attentive staff', 'freezer burnt', 'amaretto ice cream']
1190	1	5	40797	Amazing brick oven pizza!! My gf & I tried it for the first time tonight and were blown away!! Definitely coming here again.	0	Positive	['amazing', 'brick oven pizza', 'definitely']
1191	1	5	41056	Been here 100 times and it's always been delicious. I'm pretty sure I've tried everything on their menu and it's consistently good. I've been here for lunch, dinner, and events and the staff never disappoints me. If you go make sure you try their margherita pie and one of their cheese steak specials. You will be glad you did. Oh and just a random addition: I'm COMPLETELY obsessed with their muscl…	0	Positive	['been', 'margherita pie', 'cheese steak specials', 'oh', 'random addition', 'completely', 'red sauce', 'christmas']
1192	1	4	41726	There are a bunch of Italian restaurants in Park Slope. Ã‚Â I honestly like to avoid them because of the carbs, so coming here was just out of spontaneity. Ã‚Â My mate had the garlic bread - even though there was already complimentary (nice and warm!) bread. Ã‚Â Pizza dough slices were nice and toasty - though could use a touch more garlic. Ã‚Â The sausage pasta alfredo was super yummy - though i…	0	Positive	['italian', 'slope', 'garlic bread', 'pizza', 'dough slices', 'sausage pasta alfredo', 'super yummy', 'greasy mess', 'winter', 'super toasty']
1193	1	5	41657	Just had dinner at Peppino's. Ã‚Â We had spaghetti with meatballs - a huge heaping tasty platter and the make your own pizza (sweet italian sausage + mushrooms + pepperoni + onions) on a wheat crust. Ã‚Â The pizza came out on the regular non-wheat crust but the owner/manager came out and apologized for the error and made up for it by making us another pie, same toppings, with wheat crust at no ex…	0	Positive	['peppino', 'tasty platter', 'own pizza', 'sweet italian sausage + mushrooms + pepperoni + onions', 'wheat crust', 'regular non-wheat crust', 'wheat crust', 'extra charge', 'excellent food', 'excellent service', 'extra mile', 'authentic', 'italian food', 'excellent service', 'great atmosphere']
1194	1	5	41809	Peppino's is a very solid neighborhood family friendly pizza restaurant. We usually get the margarita pizza, which is fantastic with very fresh mozzarella and tomato sauce. The servers are extremely friendly, and the pizza and sandwiches are just all great. The service, variety on the menu, and non existent lines (most of the time) make this place a go to for me and my girlfriend. I highly recomm…	0	Positive	['peppino', 'solid neighborhood family', 'friendly pizza restaurant', 'margarita pizza', 'fresh mozzarella', 'tomato sauce', 'non existent lines']
1195	1	3	41625	First let me say the food is great. This is the 2nd time we were here both times the food had been great but the 2nd time the service was not good at all. We ordered a pizza ($27.00) - the black olives when the order came we had black olives on the pizza. If I am going to pay that much for a pizza at least get my order right.. We did not want to wait so we picked them off. I was expecting at leas…	0	Positive	['black olives', 'black olives', 'order right..', 'kids past', 'kids order']
1196	1	4	41559	Great service and great food. Ã‚Â Lost a star due to hot, hot, hot bathroom with only scalding hot water out of sink. Ã‚Â Cold faucet is burning, burning hot! Ã‚Â I guess that's what happens when the bathroom is next to a wood cooking stove? Great food and great service though. Ã‚Â Would happily return!	0	Positive	['great service', 'great food', 'lost', 'hot bathroom', 'hot water', 'cold', 'wood cooking stove', 'great food', 'great service']
1197	1	5	40769	The pizza is GREAT! And the service is BETTER! We ate a cheese pizza I can say every part of the pizza was on point. The crust,the pie, and the toppings were all fresh! Next time I come to Brooklyn this is the place that will have my business!	0	Positive	['great', 'better', 'cheese pizza', 'brooklyn']
1198	1	5	41796	Excellent pizza, was walking by and the recession special caught my eye, but the yelp reviews drew me in; the service and ultimately execution knocked it out of the park. The first time was just the recession special, an amazing deal at 5 and change for two slices and a fountain soda. What sealed it was ordering delivery had two large pies one plain and one pepperoni and the quoted delivery time …	0	Positive	['excellent', 'yelp reviews', 'fountain soda', 'large pies', 'delivery time', 'brick oven taste', 'detail leaves']
1199	1	5	40608	This place is amazing I really loved their appetizers specially the backed muscles abd the mozzarella basil salad, and the shrimp there is really good as well one of the places I really loved their food in New York.	0	Positive	['muscles abd', 'mozzarella basil salad', 'york']
1200	1	4	41026	really good pizza, for a really good price.	0	Positive	['good pizza', 'good price']
1201	1	4	41829	Great pizza with a fresh and crispy crust and wide variety of toppings. Definitely the best pizza in the area. The delivery is a bit spotty but I think that is mostly due to my ordering at high volume times. In addition, the owner, or maybe the manager on duty, called as a follow up to ensure my satisfaction with the order. I highly appreciate this kind of service, which is also present in the re…	0	Positive	['great pizza', 'crispy crust', 'wide variety', 'definitely', 'bit spotty', 'high volume times', 'young wait staff', 'friendly neighborhood spot']
1202	1	5	40717	This place makes an amazing pizza pie. Ã‚Â Perfect crispness, tangy sauce, fresh mozzarella that doesn't make the pie damp, and the perfect amount of fresh basil. Ã‚Â Our 6 & 7 year old nieces loved it too.	0	Positive	['amazing pizza pie', 'perfect', 'tangy sauce', 'fresh mozzarella', 'pie damp', 'perfect amount', 'fresh basil', 'old nieces']
1203	1	4	41003	I walk by this place every day and after a friend nominated it the best pizza in Park Slope, I felt compelled to try it. My boyfriend and I went here a few nights ago and had the bruschetta as an appetizer and a small half-pepperoni and cheese (his half) and half-pizza a la vodka (mine!) We were impressed! The bruschetta was fresh, full of onions and garlic (yum!). The pizza came out fairly quick…	0	Positive	['slope', 'small half-pepperoni', 'brick oven style', 'small pizza', 'crispy pepperonis', 'bold flavors', 'good pizza']
1204	1	4	41156	Here's another place I wish I had tried sooner, I mean it is in my neighborhood! Ã‚Â I guess I always just ignored it because it replaced the beloved "Aniello's" pizzeria that was in the neighborhood for years and had become well known with the old school locals. But shame on me. In the mood for Italian but not wanting to stray to far, we went to check it out. Nice place and the food smelled fant…	0	Positive	['aniello', 'old school locals', 'italian', 'nice', 'puttanesca pizza', 'Ã¢ romaine lettuce', 'cherry tomatoes', 'balsamic vinegar', 'tangy', 'tomato sauce', 'black olives', 'fresh mozzarella', 'delicious', 'thin crust', 'brick oven', 'big fan', 'black olives', 'kalamata', 'love']
1205	1	5	40748	One of the best pizza and Philly cheesesteak I ever had! I order delivery and it was quick! I would be ordering from here from now on :)!!	0	Positive	['philly', 'order delivery']
1206	1	4	41527	Big Fan! Ã‚Â love the pizza here! Staff is super nice.	0	Positive	['fan', 'staff']
1207	1	4	41179	We ate here this evening with 4 adults and 2 kids ( 10 year old and 14 year old). We had pizza and two salads. I ordered the Tuna Salad which was made with high quality Italian (olive oil) Tuna. All the ingredients were fresh and the salad was delicious. The kids are living in Massachusetts and love "New York PIzza." Ã‚Â and they were impressed as were the adults. Towards the end of the meal a ma…	0	Positive	['tuna salad', 'high quality', 'olive oil', 'tuna', 'massachusetts', 'york pizza', 'towards', 'possible owner', "husband 's hand", 'keep', 'dark crust', 'customer satisfaction']
1208	1	5	41193	Very nice simple and cozy place! They provide an amazing service. The Margarita pizza was soooo good: juicy and crispy. Tip: you get free soda refills which is really pleasant. :) love it! Thank you!	0	Positive	['cozy place', 'amazing service', 'margarita', 'soooo good', 'tip', 'free soda refills', 'thank']
1209	1	5	40768	Great Pizza Big servings Our waitress was super nice Free soda refills Simple, but excellent! Will Definitely come back.	0	Positive	['pizza', 'big servings', 'free', 'soda refills', 'simple', 'will definitely']
1210	1	5	41716	Peppino's isn't on any of those "best pie" lists for NYC, but I'm not quite sure why. Ã‚Â The pizza is great and significantly cheaper than their competitors. Ã‚Â The staff are very helpful and social, and you don't have the crazy wait like you do at Paulie Gee's, Roberta's, Motorino, etc. Ã‚Â We made a trip out to Park Slope to try this place, and I'm glad we did. Ã‚Â I will absolutely be visiti…	0	Positive	['peppino', 'nyc', 'crazy wait', 'paulie gee', 'roberta', 'motorino', 'slope']
1211	1	5	41540	This place is amazing. The good rocks the service is stellar and I'll be coming back time and time again. If you're looking for a great Italian restaurant in Park slope this is the place to go to. Highly recommended!!!	0	Positive	['good rocks', 'great italian restaurant', 'park slope', 'highly']
1212	1	5	41557	My boyfriend and I take out from here. It's so delicious!!!!	0	Positive	[]
1213	1	5	40703	Absolutely LOVE Peppino's!!! Walk in and you're greeted by an eclectic decor in honor of all things brooklyn/ Italian. What makes this place great? -1. Delicious food! You can't go wrong with ANYTHING! I promise you. From the pizzas to the seafood to the calzones, it's all melt in your mouth deliciousness. 2. Ã‚Â FANTASTIC customer service. Wow! My family has been dining here for 5+ years and we …	0	Positive	['absolutely love peppino', 'walk', 'eclectic decor', 'things brooklyn/', 'delicious', "ca n't", 'anything', 'mouth deliciousness', 'fantastic', 'customer service', 'wow', '5+ years', 'bad experience', 'family run business', "ca n't", "'s worth"]
1214	1	5	41570	Great food great service. Ã‚Â I always have the margarita pizza. Cesar salad Ã‚Â with perino beer. Ã‚Â It's like heaven. Ã‚Â Price us up there but worth the ingredients they use. It is not a tourist trap pizzeria	0	Positive	['great food', 'great service', 'margarita pizza', 'cesar', 'salad Ã¢', 'perino beer', 'price', 'tourist trap pizzeria']
1215	1	5	41673	I am blessed to have Peppino's be my go to delivery pizza. To have a pie of such high caliber brought to my door is always a surprise.	0	Positive	['peppino', 'delivery pizza', 'such high caliber']
1216	1	4	40806	This place is fabulous. It's got a really classic, homey vibe (brick walls, kids' letters or drawings on the walls) and they serve a bunch of dishes with a wide price range. My fiance and I shared the veggie pizza and a bowl of garlic bread (basically pizza crusts with garlic and marinara sauce). The pizza was really good, the wine was good, the crusts slathered in oil and garlic were (obviously)…	0	Positive	['homey vibe', 'brick walls', 'wide price range', 'veggie pizza', 'garlic bread', 'pizza crusts', 'marinara sauce', 'substantial amount', 'laid-back atmosphere', 'whole pie', 'clear sign', 'veggie pizza option']
1217	1	5	40790	Growing up on 10th Street in Park Slope, Brooklyn we had several outstanding Pizzeria's to choose from. So when taking my daughter and her fiance on a pizza quest I naturally had to stop in my old neighborhood and sample a slice from Anellio's, which wasn't there anymore. Instead Peppino's Brick Oven Pizzeria now occupies the location. I quickly looked up the comments on Yelp and saw that it was …	0	Positive	['growing', 'slope', 'brooklyn', 'pizzeria', 'pizza quest', 'old neighborhood', 'anellio', 'peppino', 'brick oven pizzeria', 'yelp', 'old business', 'style counter', 'brick', 'plane sight', 'pizza', 'margarita', 'meatballs', 'young girl', 'nice touch', 'pizza', 'brick', 'pizza', 'sauce', 'mozzarella', 'brick oven pizza', 'texture', 'right amount', 'overall', 'pie', 'good service', 'rocks', 'pizza…
1218	1	5	41742	One of the best pizza places in Brooklyn. Also they have a fish salad and lentil soup that is incredible. The bread is always fresh and are always happy to get you more. Small casual place but the food is always great.	0	Positive	['pizza places', 'brooklyn', 'fish salad', 'lentil soup', 'small', 'casual place']
1219	1	5	41534	My wife and I just ordered from here tonight, looking for a good pizza place in Park Slope. We've tried a few in and around the South Slope area - Smiley's, Pizza Plus, Enzo's, etc... - and Peppino's is far and away the best. We were told delivery would be 45 minutes, and our order arrived a shade under 25. A large, coal-fired pepperoni reminiscent of those you see at Juliana's, Roberta's, and Gr…	0	Positive	['good pizza place', 'slope', 'slope', 'smiley', 'pizza', 'enzo', 'etc ...', 'peppino', 'juliana', 'roberta', 'grimaldi', 'chewy crust', 'spicy meat', 'flavorful sauce']
1220	1	5	40703	I had the best margarita pizza ever here. Ã‚Â The fresh mozzarella is wonderful, and their tomato sauce is amazing.	0	Positive	['margarita pizza', 'fresh mozzarella', 'tomato sauce']
1221	1	4	41718	two slices with fresh cooked sausages very good	0	Positive	[]
1222	1	3	41157	Fast delivery, pretty good pizza (half margherita half puttanesca) I like more crunchy crust and this was not enough. I might try it again, eating in the pizzeria, because delivery is not for sure the best if you want crunchy staff... This time I was too hungry but next time I will make it crunchier warming it up on a non sticking flat pan.	0	Positive	['fast', 'pretty good pizza', 'crunchy crust', 'crunchy staff ...', 'flat pan']
1223	1	5	41732	Really great pizza, and very nice family-vibe staff. Have ordered take out a bunch of times. Once when my girlfriend had called the wrong location by mistake for our pick up order, they apologized as though it was their mistake and sat me down with a complimentary glass of wine to wait for my order to be done. That's how you do it!	0	Positive	['really', 'great pizza', 'nice family-vibe staff', 'have', 'wrong location', 'complimentary glass']
1224	1	5	41219	Came here yesterday after I went to the gym. I was hungry and needed some good pizza so I turned to yelp. This place showed good reviews and the outside looked nice and clean so I gave it a shot. I ordered a small regular pie and it was so good I ate it all myself. Although I was very full it was worth every drop. It has a crispy crust the sauce is just right and the cheese isn't cheap. If your p…	0	Positive	['came', 'good pizza', 'good reviews', 'small regular pie', 'crispy crust', "'s worth", 'great cozy ambiance', 'typical pizza joint']
1225	1	5	41430	So a friend is over my somewhat secluded spot in Gowanus and rather than peruse 4th/5th ave for a place to eat they ask me "What's good around here?", that's when I don't even think, like a math equation I just say "You should get Peppino's." And usually they get Peppino's. It was the first meal I had when I moved to Gowanus and I won't have to look anywhere else for pizza. As long as I am orderi…	0	Positive	['gowanus', 'peruse 4th/5th ave', 'math equation', 'peppino', 'peppino', 'gowanus', "wo n't", 'peppino', 'italy', 'fresh mozzarella', 'crispy crust', "'s chewy", 'slight char', 'sauce uses', 'good tomatoes', 'italian fare', 'great customer service', "'s success"]
1226	1	5	41137	My foodie troupe and I usually choose trendy Manhattan spots, but when I suggested coming to my apartment in Brooklyn (the horror!), we wanted to keep dinner easy and nearby. We meandered down 5th Avenue to Peppino's - recommended to me in passing by a local friend. The space reminds me a lot of a restaurant that I'd find in my farmerville hometown in PA. No bells and whistles. Plastic tablecloth…	0	Positive	['foodie troupe', 'manhattan', 'brooklyn', '5th avenue', 'peppino', 'local friend', 'space reminds', 'farmerville hometown', 'pa.', 'plastic', 'high school', 'fantastic', 'cheap', 'perfect']
1227	1	2	40620	I was expecting better pizza after reading the reviews. Kinda over priced too.	0	Positive	['kinda']
1228	1	5	40800	Came in on a Sunday afternoon. Wasn't too busy. There was a great, throwback vibe to the place. Checkered tablecloths, bottles of soda, a bright red neon sign in the back. It just felt like old America. As I sit down, I am promptly greeted by my waitress, who runs me through the menu like a pro and recommends the vodka pie. She was very friendly and eager to please. She brought me delicious free …	0	Positive	['came', 'was', 'throwback vibe', 'checkered', 'bright red neon', 'america', 'vodka pie', 'free bread', 'perfect harmony', 'prosciutto', 'nyc', 'pizza experience']
1229	1	5	41670	This place might not have the scene that Lucali's and Giuseppina's have, it definitely doesn't have the exposure and hype of places like Di Fara, L&B's and Lombardi's, but if you peel all of that way away, this place can hold its own with any pizza restaurant in New York. Ã‚Â In a blind taste test with the top 10 NYC pizza places, it would, at the very least, be a contender. Ã‚Â Their pastas and …	0	Positive	['lucali', 'giuseppina', 'di fara', "b 's", 'lombardi', 'pizza restaurant', 'york', 'blind taste test', 'nyc', 'pizza places', 'peppino', 'family-run business', 'great experience']
1230	1	1	41639	The pizza sauce tastes worse than from a can, watery like consistency. Toppings thrown on, too much ricotta on white pizza. Garlic crisps were soggy flavorless leftover pieces of crust.	0	Negative	['pizza sauce tastes', 'toppings', 'white pizza', 'garlic', 'soggy flavorless leftover pieces']
1231	1	3	41023	I've been here twice. I got the spinach ravioli both times and it was really good. I do have a complaint though. I went there yesterday at around 10pm and this place was filthy! The floors were disgusting and we had to wipe crumbs out of our seats.	0	Negative	['spinach ravioli', 'wipe crumbs']
1232	1	5	41140	This place is amazing! My boyfriend lives right by it and we came across this gem last year in the winter and it was so warm, cozy and smelled DELICIOUS. We ended up deciding to split a chicken roll, OMG so great and it was huge! It was enough to satisfy us both! The people that run the place are also as nice as can be, countless times they have given us garlic crisps on the house. Only downfall,…	0	Positive	['delicious', 'chicken roll', 'omg', 'countless times', 'garlic crisps', 'i forgot']
1233	1	5	41209	My wife and I moved across the street from Park Slope Peppinos about a year ago. We've been regulars ever since. I kept saying I was going to give a good shout out on yelp, but never got around to it. Tonight I just had to do it. My wife and I brought our 5 month old in here tonight, and once again, they treated us like family. After long hard days, it just feels great. I've lived in NYC for over…	0	Positive	['slope peppinos', 'good shout', 'long hard days', 'nyc', 'family vibe']
1234	1	4	40750	So far I've ordered a regular pie, margarita pie, chicken Cesar salad & chicken roll, all were very good. I see that this place has good rating for there plates, I'm yet to try it; but will soon. They lost a star because one day I called to order I believe a salad and a drink, they wouldn't deliver it because I was off by I believe two dollars, I really hate when places do this, like seriously...…	0	Positive	['regular pie', 'margarita pie', 'cesar', 'chicken roll', "wo n't", 'delivery person', "n't $"]
1235	1	5	40692	My family love this place. I rarely write reviews . . . Ã‚Â Every time I come either for a pizza or for say eggplant parm . or seafood platter etc I am not disappointed. we also are treated so well, like family. if you see the seafood platter as a special other it, it is amazing.	0	Positive	['eggplant parm', 'seafood platter etc', 'seafood platter']
1236	1	5	41469	Brooklyn is known to have some of the best pies known to the Americas and after sampling so many pizza joints in Brooklyn, probably the best I have ever tasted is right around the corner of our house!!! After living here for over a year, Didn't even know we were missing out on one of the best pizzas my tastebuds have ever known. I'm sorry tastebuds, but now you can now be oh si satisfied . The br…	0	Positive	['brooklyn', 'americas', 'pizza joints', 'brooklyn', 'sorry tastebuds', 'oh si', 'chewy', 'kids', 'great family', 'italian restaurant']
1237	1	5	41296	Happend to be in the area and was looking for someplace to eat. Ã‚Â We stopped in here after reading the reviews on yelp. Ã‚Â I originally passed it and looked in thinking, "Man it looks hot in there" because the whole front was open. Ã‚Â Not realizing that was the place I was looking for but I took a chance. Ã‚Â We had lasanga w/ a mixed vegetables on the side, spinach ravioli, tomato and mozzar…	0	Positive	['happend', 'whole front', 'lasanga w/', 'spinach ravioli', 'tasted', 'pizza dough', 'either', 'oh', 'was']
1238	1	5	41104	It's a miracle! I have found my Italian food sanctuary! After a couple drinks at the local bar, we walked up to 5th ave and were torn between the diner and this place that I caught in the corner of my little brown eye. We flipped a coin (literally) and lucky for us the choice was Peppinos. As we were walking in a big group was leaving. Since it was close to 11pm I was afraid they were getting rea…	0	Positive	['italian food sanctuary', 'couple drinks', '5th ave', 'brown eye', 'peppinos', 'big group', 'once', 'super sweet', 'free pieces', 'garlicky goodness underneath', 'red onions', 'soooo good', 'pasta fagioli', 'great ... kind', 'think', 'garlic clove', 'good nonetheless', 'penne alla vodka', "friend 's", 'penne alla boscaiola', 'whole dish', "friend 's food", 'wee bit', 'average italian spot', 'hug…
1239	1	4	41645	Peppino's make really, really good pies it has to be said, although I've never been to their Bay Ridge location. Ã‚Â A little pricey, sure, but they have Park Slope real estate prices to be dealing with and the ingredients are high quality. Ã‚Â Top notch sauce and good cheese, they're only a few yards behind the tall trees like Totonno's and Juliana's in the crust stakes, but it's high praise eve…	0	Positive	['peppino', 'good pies', 'bay ridge location', 'slope', 'real estate prices', 'high quality', 'top', 'notch sauce', 'good cheese', 'tall trees', 'totonno', 'juliana', 'crust stakes', 'legendary status', 'pizza mecca', 'brooklyn']
1240	1	4	41104	Best pizza in south park slope. Ã‚Â I don't know if it's because clearly all the Italians go here or that it is also Italian run, but ya it is pretty damn good. Ã‚Â I get the baby size (ie personal pizza) margherita.	0	Positive	['park slope', 'italians', 'italian run', 'pretty damn good', 'baby size', 'personal pizza']
1241	1	5	41394	Delicious pizza. Reminds me of Grimaldi's minus the wait time. Chewy crust, savory cheese, flavorful sauce. The Margherita pizza here is fantastic. The restaurant is cute and service here is good. A nice little pizza joint in Park Slope.	0	Positive	['delicious', 'reminds', 'grimaldi', "'s minus", 'chewy', 'savory cheese', 'flavorful sauce', 'margherita', 'nice little pizza joint', 'slope']
1242	1	4	40969	The food here is absolutely delicious. And it's just a calm environment where it's always pleasant to sit down and eat, even when it's crowded. Friendly staff. Prices aren't too bad.	0	Positive	['friendly', 'prices']
1243	1	4	41444	I live nearby, and I discovered this place a few months ago, as I had an urge to have some pizza, so I walked in. Ã‚Â I was shocked at how good the pizza was in such an unassuming place! The pizza looks like it's made from fresh ingredients, and it tastes like so. The more and more I eat this pizza the more I'm liking it, so far it hasn't disappointed. The service is not that good, at least a cou…	0	Positive	['fresh ingredients', 'such great pizza', "'ll ignore", 'so-so service']
1244	1	4	40703	Really good pizza here. The diavola is awesome, the sausage is really fresh and has a bit of spice that makes it very enjoyable. Beer's a little pricey at 4.50 for a Brooklyn pint, but it's not a bar, so I can let it pass. I'd like to go back and give their cheesesteaks a world. I thought the prices were pretty reasonable too.	0	Positive	['really', 'good pizza', 'beer', 'brooklyn']
1245	1	4	41482	If, for the rest of my life, I could either only go to this place or to Franny's, I would choose Peppino's in a heartbeat. It's not fancy, it doesn't serve ramps, and you're more likely to see an off-duty cop eating there than a Gyllenhaal -- but it's delicious, mellow, and affordable. Every waiter I've had has been friendly and attentive. The pizza arrives quickly and with a nice slight char on …	0	Positive	['franny', 'peppino', 'off-duty cop', 'gyllenhaal', "'s delicious", 'pizza arrives', 'nice slight char', 'whenever', 'good mood', 'whole bunch', 'best']
1246	1	4	40998	We frequently order here for staff meetings. They sandwiches are the winner...chicken parm, eggplant parm, grilled chicken w/ balsamic, & cheesesteak make everyone happy. To feed 40 people under $250 and still have food left over is great in my book.	0	Positive	['staff meetings', 'winner ... chicken parm', 'eggplant parm', 'chicken w/ balsamic']
1247	1	5	41057	Service was great and my favorite thing on the menu -- CHEESE STEAK SPECIAL! It's one of the tastiest! Ã‚Â I always order delivery and they're always quick and food still taste great.	0	Positive	['favorite thing', 'cheese steak special', 'order delivery']
1248	1	1	41497	We were scheduled to play a Make Music New York festival performance at Peppino's South Slope today and the manager was such a complete jerk. Ã‚Â We were scheduled by the Park Slope 5th Ave BID to play there and it was made clear there would be electricity available, but the manager made it clear that he didn't know anything about it, in spite of the MMNY poster taped to the inside of his front w…	0	Positive	['york', 'festival performance', 'peppino', 'slope', 'complete jerk', 'slope', 'ave bid', 'mmny', 'front window', 'time making calls', 'power cord', 'amazingly', 'free music', 'world class musicians', 'please', 'pizza places', 'slope', 'polite managers', 'good business decisions']
1249	1	4	41418	Tasty pizza, decent size meals.. they are generous on their subs too. The salad is average, wasn't so fond of it but they have speedy service. If you want your food and you want it fast, check them out.. you wont be disappointed.	0	Negative	['tasty', 'decent size meals..', 'speedy service']
1250	1	4	41202	Went to Peppinos tonight and it was very good....The atmosphere is welcoming and the service was great! Ã‚Â We had the mozzarella and tomato to start off (so fresh), then the pizza (half vodka and half Margherita) the crust was so crisp and chewy at the same time..and then finished with pasta (sauce was very homemade and delish!!). Ã‚Â The staff was polite and always checking in on us to see if w…	0	Positive	['went', 'peppinos', 'good ... .the atmosphere', 'margherita', 'definitely', 'nice casual dinner ...', 'thanks peppino', 'new spot', 'town guest', 'yum']
1251	1	5	41782	SO GOOD. Ã‚Â The pizza was delicious (we had spicy sausage and olives), and the service was prompt, polite, and friendly. Ã‚Â I've lived in the neighorhood for three years, and I can't believe it's taken me this long to discover Peppinos. Ã‚Â The decor and ambience is a bit lacking, but we will definitely be returning.	0	Positive	['so good', 'spicy sausage', "ca n't", 'peppinos']
1252	1	4	41623	Great brick oven pizza in Park Slope with friendly staff. Ã‚Â The restaurant itself doesn't really stand out, looks like your typical neighborhood pizza joint but the brick oven pies are definitely better than any other I've had in the vicinity. Ã‚Â If they had their 2 slices for $5 special late at night I'd be here all the time!	0	Positive	['great brick oven pizza', 'slope', 'friendly staff', 'typical neighborhood pizza joint', 'brick oven pies']
1253	1	4	41854	I have to admit, I wasn't sure what to expect when walking in, and didn't expect the pizza here to be as good as it was. We started with the bruschetta, which was delicious. The bread was toasted perfectly; crispy on the outside and soft on the inside. Though I don't remember details, the pizza was delicious. We ordered a large Margherita, and each component had a distinct and robust flavor. Not …	0	Positive	['margherita', 'robust flavor', 'opera music', 'family pictures', 'peippino', 'good chance']
1254	1	5	41102	This is the best Italian restaurant ever. The pizza is excellent. Ã‚Â I have also had the eggplant parm and pasta dishes which were all very good. Ã‚Â The service is excellent too. I will definitely keep coming back.	0	Positive	['italian restaurant', 'eggplant parm']
1255	1	5	40815	My husband and I have been twice so far and both times we were very happy with the service and food. The first time my husband got a pizza and I got the mixed salad with chicken. The salad was really good for a pretty simple salad, but if you'er a salad eater you know how easy it is for places to mess it up. Our second visit we ordered a meatball sub and salad to share and both were really good a…	0	Positive	['pretty simple salad', 'salad eater', 'meatball sub']
1256	1	5	41524	I am not sure what took us so long to find this place but we finally decided to try Peppino's after living in the neighborhood for almost two years. I could kick myself now that I know what we have been missing. They have perfected the pizza here. There is no comparison with other pizza by the slice joints in the area. The wood burning, brick oven makes all the difference. The pizza was fantastic…	0	Positive	['peppino', 'slice joints', 'brick oven', 'vito', 'sweet guy', 'peppino', 'peppino', "'s place", 'thank', 'peppino', 'loyal customers']
1257	1	4	40917	We were a huge group of 16 yesterday for lunch, and they sat us right down. Ã‚Â We ordered a billion pizzas and tons of salads and they didn't blink. Ã‚Â Peppino's is really great! Ã‚Â The food we ate was delicious, the service was top notch, and the price didn't break the bank. Ã‚Â This was an absolutely glorious NYC Pizza experience. Ã‚Â I'd recommend that anyone and everyone check this place o…	0	Positive	['huge group', "n't blink", 'peppino', 'top notch', 'nyc pizza']
1258	1	4	41787	I came here on a Sunday night, there was quite a few people. It had a nice atmosphere. I've ordered pick up from here before but never ate in, but this Sunday was different! We got a bottle of wine, La Bastardo, which was delicious! (And I hardly ever really like red wines) We got olive and spinach on a margherita pizza and garlic bread to start. I enjoyed their garlic bread, there was plenty. Th…	0	Positive	['nice atmosphere', 'bastardo', 'red wines', 'margherita pizza', 'garlic bread', 'garlic bread', 'good crunch', 'fresh ingredients']
1259	1	5	40720	great brick oven pizza. Ã‚Â very friendly and helpful staff. Ã‚Â In my opinion the best pizza in brooklyn.	0	Positive	['great brick oven pizza', 'helpful staff']
1260	1	5	40972	I'm a lifelong Brooklyn resident who loves pizza. And I loved the pizza here. Ã‚Â This place has great brick oven pies. Cheese is real and fresh with just the right amount of saltiness. The sauce was absolutely delicious. The crust has just the right amount of burn to it. Loved it. Will def go back prices were good. Portion size was good for two to split on one six slice pie. Good service. And a …	0	Positive	['brooklyn', 'great brick oven pies', 'cheese', 'right amount', 'right amount', 'loved', 'will', 'portion', 'slice pie', 'good service', 'nice clean atmosphere']
1261	1	5	40706	This place has a great "neighborhood pizza place" vibe that I loved. Ã‚Â Red checkered tablecloths, parmesean and dried chili pepper shakers on the tables, friendly waitresses and staff, decent beer and wine list, and some nice menu items, mellow and kid-friendly atmosphere. But the best part about it - the pizza is WAY BETTER than your average "neighborhood pizza place". Ã‚Â The brick oven pies …	0	Positive	['neighborhood pizza place', 'chili pepper shakers', 'friendly waitresses', 'decent beer', 'wine list', 'nice menu items', 'way better', 'neighborhood pizza place', 'brick oven pies', 'right amount', 'great flavor', 'tangy', 'real mozzarella cheese', 'right amount', 'pie 5/8ths 3/8ths', 'love', 'will']
1262	1	5	41791	I looove pizza, and this is IT. Second best to Grimaldis (which is my favorite) At Peppinos i've tried the Vodka Pie with Whole Wheat crust which was fantastic and the steak hoagie that was soo juicy it melts in your mouth. Check this place out, its a winner.	0	Positive	['looove pizza', 'it', 'grimaldis', 'peppinos', "i 've", 'vodka pie', 'whole wheat', 'steak hoagie', 'soo juicy']
1263	1	4	41512	Great italian joint. Great food and reasonable prices. Their brick oven pizza is AMAZING. If you haven't experienced Peppinos yet, you must.	0	Positive	['great italian joint', 'great food', 'reasonable prices', 'brick oven pizza', 'amazing', 'peppinos']
1264	1	4	41546	Unfortunately I'm writing this review very late. I was here almost a year ago. Anyways I'm going to keep this simple. Brick oven pizza is always the way to go when u can. The pizza here is really good and I do plan on going back again. The prices do not reflect your average pizza spot but this is not your average pizza spot. If you find yourself in the area you should definitely atop in and try t…	0	Positive	['anyways', 'brick', 'oven pizza', 'average pizza spot', 'average pizza spot']
1265	1	5	41578	Professional service, delicious food, and consistency; what more can you ask for in catering and for dinner. Ã‚Â We've had them cater several family gatherings and they went far beyond what was expected; following up and coming back to make things absolutely perfect. Ã‚Â Can't say enough about these guys.	0	Positive	['professional service', 'delicious food', 'family gatherings', 'ca']
1266	1	5	41086	I enjoy going there ,never let me down. Always fresh	0	Positive	[]
1267	1	4	40621	Peppinos is delicious. Ã‚Â The garlic crisps are a MUST. Ã‚Â I'm a big Penne Vodka pizza fan so I would recommend that, but all their pizzas are pretty delicious. Ã‚Â Their deliver times are a bit slow though so they lost a star from me. Ã‚Â However, if you get a chance to walk in and try some food you definitely should. Ã‚Â The waiters are quite nice.	0	Positive	['peppinos', 'garlic crisps', 'must', 'penne vodka', 'pizza fan', 'pretty delicious']
1268	1	4	41160	I scoped this place out when looking for some conveniently located pizza in Brooklyn. Ã‚Â I like brick oven pizza more than standard New York pizza, so this looked like a pretty promising restaurant. The staff is friendly here; it really seems like a neighborhood joint. Ã‚Â They seemed to know their customers by name, based on what I gathered from the few others people there that time of day. I w…	0	Positive	['brooklyn', 'brick oven pizza', 'york', 'pretty promising restaurant', 'neighborhood joint', 'others people', 'boylan', 'favorite soft drink bottlers', 'ginger ale', 'alla vodka pizza', 'pretty good brick oven pizza', 'alla vodka', 'pizza bianca', 'puttanesca', 'bit sparse', 'overall', 'good neighborhood pizza place', 'brick oven pizza']
1269	1	4	41262	I am obsesseddd with their cheesesteak. Thanks to Elizabeth R.'s review, I gave it a try and now, always order it for lunch.. eat half and take the other half home for later. The delivery is always fast and they usually get my order right and put whatever else it is I request in the bag (forks, parm, napkins, etc.) Wouldn't hesitate ordering.. do itt!!	0	Positive	['thanks', 'elizabeth r.', "'s review", "n't hesitate ordering.."]
1270	1	4	41119	Peppinos is pretty nondescript both inside and out. The true treasure is in its brick oven pizzas. I have only had the standard margherita pie, but the crust is thin, crispy, flavorful, and the cheese and sauce are outstanding. It is close in distance to us and also in quality to some of the better pizza places in Park Slope and the prices are definitely great for the quality. If you are by yours…	0	Positive	['peppinos', 'true treasure', 'brick oven pizzas', 'standard margherita pie', 'pizza places', 'slope', 'small group', 'medium pies', 'special lunch', 'standard cheese pie']
1271	1	5	41203	This place is in my grandma's neighborhood. Ã‚Â We're from NJ so we don't come often, but this is definitely my husband's favorite Italian restaurant. Ã‚Â Everything we've had from here has been delicious!	0	Positive	["grandma 's neighborhood", 'nj', "husband 's", 'favorite italian restaurant']
1272	1	5	41466	tip: great brick oven pizza place with garlic crisps Diavola and Margherita were very crispy, tomato sauce very fresh. Ã‚Â i imagine they would only be good when their just out of the brick oven, else the crust would be soggy real fast. Ã‚Â garlic crisps are awesome, very garlicky.	0	Positive	['great brick oven pizza place', 'garlic crisps', 'diavola', 'margherita', 'tomato sauce', 'Ã¢ i', 'brick oven', 'Ã¢ garlic crisps']
1273	1	5	41130	Excellent service and the food is so amazingly delicious. This restaurant has a moms and pops type feeling. You feel cozy and can enjoy your meal without being squished into small tables.	0	Positive	['excellent', 'type feeling', 'small tables']
1274	1	5	41113	cheesesteak cheesesteak cheesesteak cheesesteak !!! you'll thank me later. Ã‚Â eat here now!	0	Neutral	['cheesesteak cheesesteak cheesesteak cheesesteak']
1275	1	4	41708	One of the better Pizza places in the slope. Ã‚Â They do sell cheese slices at lunch but is more of a sit down/deliver whole pie place. Ã‚Â It's also less fancy than some of the more high-end pizza joints, with checkerboard tablecloths. Ã‚Â Pies are made to order in a wood-fired oven, which is key. Ã‚Â Hot, tasty, brimming with ingredients. Ã‚Â If you want good pizza in a casual place, Peppinos w…	0	Positive	['pizza', 'cheese slices', 'whole pie place', 'high-end pizza joints', 'checkerboard tablecloths', 'pies', 'hot', 'good pizza', 'casual place', 'peppinos']
1276	1	5	41835	As far as Pizza goes, NY has a crazy amount of spots to try. But the best pizza I have come across is from Peppinos! It cheesy goodness will make anyone's day better, and I am not usually a pepperoni slice of pizza person, but here I am all about it! Every Saturday for lunch I come here to get two slice's of pizza and a soda for $5, closer to $6 if you get pepperoni. Many pizza places have that d…	0	Positive	['pizza', 'ny', 'crazy amount', 'peppinos', 'cheesy goodness', "'s day", 'pepperoni slice', 'pizza person', "slice 's", 'pizza places', 'real']
1277	1	4	40674	Possibly, maybe, on a good day the best pizza in South Brooklyn. The problem here is consistency. Some days this pizza is absolutely perfect and some days it's soggy and a little gross. This is actually a 50-50 issue here. But the days when it's good, it's goooood.	0	Positive	['possibly', 'good day', 'brooklyn', "'s soggy", "'s goooood"]
1278	1	4	41658	Peppinos in Park Slope is a friendly restaurant that makes very good brick oven pizza. The crust is exceptional if you like thin crusted pizza. The other ingredients were also quite good though we thought the sauce was a little too light and watery. All the serve staff made us feel welcome. It is a nice place for a midweek dinner.	0	Positive	['peppinos', 'slope', 'friendly restaurant', 'good brick oven pizza', 'nice place', 'midweek dinner']
1279	1	5	41803	While we have never eaten in the restaurant, my fiancÃƒÂ© and I have faithfully ordered delivery from Peppinos for about a year now. Their sandwiches are amazing!!! Finally, someone who knows how to make an eggplant hero! They are consistently friendly, fast, and the food always arrives piping hot. Every time we try a new dish on the menu, we are impressed!	0	Positive	['peppinos', 'eggplant hero', 'new dish']
1280	1	4	41248	Solid brick oven pie.	0	Neutral	['brick oven pie']
1281	1	5	40975	I love it so much.I was very sad when we had to move from south slope to sunset park as I would not get to go there as often as I want, or just walk past it every day. But they delivered the food to our area too.	0	Negative	['sunset park', 'just walk past']
1282	1	3	40976	Food is okay if you pick the correct one ! Service was okay.Bit pricey	0	Positive	['okay.bit pricey']
1283	1	5	40888	On first moving to Brooklyn from down South, I figured I was trading barbeque for pizza and set about trying to find a suitable pie that I could have delivered or was, at a minimum, easy to obtain. After a lot of trial and error (really just a lot of error), I finally stumbled upon Peppinos and haven't looked back since. This is my go to spot for a traditional NY style pizza these days. Sure, the…	0	Positive	['brooklyn', 'suitable pie', 'peppinos', 'ny', 'style pizza', 'sure', 'pizza joints', 'solid platinum', 'peppinos', 'peppinos', 'sweet tomato base', 'fresh mozzarella', 'top notch pizza', 'favorite pie', 'tartufata', 'toby', 'delivery pie', 'nyc', 'well', 'peppinos', 'great slice']
1284	1	4	41367	We order pizza here at least once a month and every time it is great. We love the margarita pepperoni pizza - the pepperoni is tasty and the mozzarella is delicious! Plus you get pretty fast delivery. Have to love that!	0	Positive	['order pizza', 'margarita pepperoni pizza', 'pretty fast delivery', 'have']
1285	1	2	41006	Wanted to love it. Ã‚Â Looked great coming out. Ã‚Â Fell short though. Too much oil/grease. Ã‚Â Good amount of cheese and sauce and even the crust had a good texture (not too soft, not too crispy or charred) but just no flavor. 2 stars since I sure have experienced better slices. But 5 stars for friendly service and a $5.00 2 slice/soda Recession deal!! Nice owners I'd say.	0	Positive	['wanted', 'looked', 'fell', 'too', 'good amount', 'good texture', 'friendly service', 'recession', 'nice']
1286	1	4	41837	On one of our shopping trips in Park Slope, we wander in the neighborhood looking for a quick place to stop for lunch. We noticed Peppinos in the area. Their chicken caesar salad was delicious! Hearty and filling heaps of romaine lettuce, crouton, and chunky pieces of grill chicken in casear dressing. We also shared a baby margherita pizza, piping hot thin crust with fresh mozzarella, Ã‚Â tomato …	0	Positive	['slope', 'quick place', 'peppinos', 'chicken caesar salad', 'hearty', 'filling heaps', 'romaine lettuce', 'chunky pieces', 'grill chicken', 'baby margherita pizza', 'hot thin crust', 'fresh mozzarella', 'Ã¢ tomato sauce', 'olive oil', 'normally', 'sweet tooth crave', 'luckily', 'husband spot', "'ll def", 'loved', 'friendly service']
1287	1	5	41278	Not sure how I've gone so long without rating this place. Ã‚Â I eat here at least once every other week and I go here any time we have family or other out of town guests. Ã‚Â The margarita pizza is one of the best I've ever had. Ã‚Â I usually add pepperoni. Ã‚Â As good as it is to get delivered, sinking my teeth into a piping hot pizza in the restaurant is fantastic. Ã‚Â Seating in the actual res…	0	Positive	['town guests', 'margarita pizza', 'hot pizza', 'seating', 'actual restaurant']
1288	1	3	40688	It's Brick oven. Ã‚Â It's good. Ã‚Â It's Pricey. Ã‚Â Take advantage of the fresh cannoli when they appear on the menu.	0	Positive	['brick', 'pricey', 'fresh cannoli']
1289	1	3	41782	Decent pizza, albeit slightly soggy and limp (maybe from delivery time?). Wife's Raviolis were excellent and the sauce on them were phenomenal - may try a pasta dish next time as the red sauce was delicious.	0	Positive	['decent', 'delivery time', 'wife', 'raviolis', 'pasta dish', 'red sauce']
1290	1	5	41191	This place is absolutely wonderful. The wait staff is extremely courteous and attentive and the brick oven pizza is incomparable to others in Brooklyn or other boroughs. They also have pasta and sandwiches that are worth trying. The restaurant has a very home-ey and relaxed atmosphere that makes you want to go back and bring your friends and family.	0	Positive	['brick oven pizza', 'brooklyn']
1291	1	5	41661	I just moved to Park Slope and wanted to grab a quick bite to eat. Little did I know I was about have one of the best pizza and prosciutto sandwich ever. Love the doo wop / Frankie Valli mix playing over the speakers as well. Can't wait to go back and try some of the pastas.	0	Positive	['slope', 'little', 'prosciutto sandwich', 'love', 'doo wop /', 'frankie valli', 'ca']
1292	1	5	41691	Local pizza place worth going out of your way for. The Pizza a la Vodka is crazy good. John's on Bleeker is probably my favorite pizza place in NY, but this is a close second, way better than Grimaldi's. It can be a little pricey but you'll be satisfied. The pasta and heros are good as well. The garlic crisps and bread are yummy and plentiful and the salads are a good size (and their vinegar is d…	0	Positive	['local pizza place', 'pizza', 'vodka', 'john', 'bleeker', 'favorite pizza place', 'ny', 'grimaldi', 'garlic crisps', 'good size', 'delivery', 'time estimation']
1293	1	5	40818	My first time at Peppino's and thanks to fellow Yelpers we decided to stop for pizza at this restaurant before getting on the Verrazano bridge and returning to Virginia. Ã‚Â I grew up on Long Island, so I know good pizza and I couldn't let our group leave without tasting some authentic NY pizza. Ã‚Â The place is tiny, but efficient, the service was friendly and fast. Ã‚Â The food is outstanding! …	0	Positive	['peppino', 'yelpers', 'verrazano', 'virginia', 'long island', 'good pizza', 'ny', 'brick oven', 'amazing crust', 'fresh bread', 'margherita', 'plain calzone', 'meatball parmigiana roll', 'the best', 'meatball parmigiana roll', 'great tip', "'m nosy", 'definitely', 'great food', 'great service', 'good prices', 'Ã¢ business', 'delivery orders', "ca n't", 'york', 'peppino']
1294	1	5	40794	I can't help myself any longer. Ã‚Â I have to upgrade to 5 stars. Ã‚Â This place is just outstanding, regardless of the high tariff. Ã‚Â The pizza and pasta dishes are ridiculously good, as are the few apps I've tried, as well as their home-made bread. Ã‚Â To top it all, the staff are always so friendly, helpful and pleasant. Ã‚Â Top notch.	0	Positive	["ca n't", 'high tariff', 'home-made bread', 'top']
1295	1	4	40895	GREAT margherita pizza! i really enjoyed it. the personal (10") with a salad was good for two meals. $17, so a little pricey for pizza but i have no regrets. the tomato sauce was perfect and the mozz cheese fresh. the brick oven added the perfect authentic touch. i'll definitely be back for more of this	0	Positive	['great', 'margherita pizza', 'tomato sauce', 'mozz cheese', 'brick oven', 'perfect authentic touch', "i 'll"]
1296	1	3	41149	We tried Peppinos for the first time and placed an order for delivery. I will give them 5 stars for customer service but only 2.5 stars for food. The guy who took my order was very sweet, when he heard i was ordering for the 1st time, he gave us a complimentary appetizer and also upgraded our baby size pizza to a medium pizza for free. Delivery was quick. So they did great on the service side. No…	0	Positive	['peppinos', 'customer service', '1st time', 'complimentary appetizer', 'baby size pizza', 'medium pizza', 'delivery', 'service side', 'food side', 'marinara pizza', 'overall', 'veggie pie pizza', 'chunky vegetables', 'fresh herbs']
1297	1	5	41849	I've been holding off trying Peppino's because I thought they looked pricey. $15 for a small pizza? I took the plunge and decided to order a 'baby' size pizza. I thought to myself, "I can't order a baby size pizza, i'm a man! A MAN!" But then I figured, how small can the pizza actually be? So I ordered the Quatro Stagioni pizza for pickup. It was a BEAUTIFUL pizza. Probably about 10 inches wide, …	0	Positive	['peppino', 'small pizza', 'size pizza', "ca n't order", 'baby size pizza', "i 'm", 'man', 'quatro stagioni', 'beautiful', 'right amount', 'good thing', 'tasty toppings', 'otherwise', "ca n't", 'busy night']
1298	1	3	41135	Nice pizza restaurant. Marguerita pizza is great, but expensive	0	Positive	['nice', 'pizza restaurant', 'marguerita']
1299	1	5	41239	Man, what a great night at Peppino's. So we were a party of 3 and we took the large table in the window for the street view and the leg room. Great service, he talks us into making a good beer choice (a small run Italian hefeweizen with a nice looking bottle). A large party comes in, and they ask us if they can get the big table. We oblige, being polite dapper gentleman on the eve of our show at …	0	Positive	['great night', 'peppino', 'large table', 'street view', 'leg room', 'great service', 'good beer choice', 'small run', 'italian hefeweizen', 'large party', 'big table', 'dapper gentleman', 'freddy', "'s bar", 'bruschetta', 'bruschetta', 'molto', 'brick', 'tossed', 'great things', 'beautiful people', 'attractive staff']
1300	1	4	41544	Definitely the best delivery pizza in Park Slope. Compared to other local pizza that has rubbery crusts or weird tasting sauces, this pizza was really good. It will definitely be our go-to place for pizza delivery.	0	Positive	['definitely', 'delivery pizza', 'slope', 'compared', 'local pizza', 'rubbery crusts', 'go-to place', 'pizza delivery']
1301	1	5	41794	I'm so glad they're just a few blocks away. I don't really like pizza but when that pizza has mushrooms and vodka sauce on it with fresh ingredients I get easily addicted. And so does my roommate. Plus they have a two slice drink recession special that beats most other meals in this area. Yesss!	0	Positive	['vodka sauce', 'fresh ingredients', 'slice drink recession', 'yesss']
1302	1	4	41801	Great Italian takeout!	0	Positive	['great italian takeout']
1303	1	5	40664	This place does it right. The pizza is what we go for. Brick oven, tasty sauce, quality toppings, chewy/crispy/light crust, reasonable price, AND consistency (aka never burnt) ?!? You get it all here. We are often here after 9 pm with the family for a late night pizza with friends. Kids are totally OK. The service is amazing. It must be family run. You don't get that kind of calm confidence and m…	0	Positive	['brick', 'tasty sauce', 'quality toppings', 'chewy/crispy/light crust', 'reasonable price', 'and', 'late night pizza', 'kids', 'family run', 'everyone', 'message', 'peppinos', "please do n't leave the neighborhood", 'entire family', 'kids chime', 'peppinos', 'good ...']
1304	1	3	41114	I've only ever had deliveries so can't comment on the restaurant experience. Love the Pizza Alla Vodka. Perfect base and a great mix of toppings. Also the Orrechiettie pasta is awesome as long as you like a lot of oil and garlic, the latter of which I actually don't (I realize this makes me a freak) but I eat it anyway it's just that good. Fusilli Fridiavola is well worth it too. Delivery is a li…	0	Positive	["ca n't comment", 'restaurant experience', 'love', 'pizza alla vodka', 'perfect', 'great mix', 'orrechiettie', 'fusilli fridiavola', 'delivery', 'peak times', 'things bother', 'firstly', 'diavola', 'too', 'secondly', 'cost $', 'that']
1305	1	5	40685	This place is awesome !!!!!!!!!!!!!! Great prices, large portion, brick oven pizza is amazing !!! Service is wonderful this place is my favorite spot. great deal for 2 slices of pizza and a drink for 5 bucks !!!	0	Positive	['great prices', 'large portion', 'brick oven pizza', 'favorite spot']
1306	1	4	41058	In search of the best pizza in NY I happened upon this place. Although it didn't turn out to be the holy grail of pizza, it was quite good none the less, thoroughly enjoyed it. Ordered half pepperoni and half alla vodka, soo good. Felt like an authentic brooklyn pizza shop too, great atmosphere.	0	Positive	['ny', 'ordered', 'alla vodka', 'soo good', 'felt', 'authentic brooklyn pizza shop', 'great atmosphere']
1307	1	3	41865	The pizza was fine, a little pricey. Ã‚Â I don't know why people have gushed on here about the pizza, it was ok, not bad, not great or anything. Ã‚Â I will stick with Pinos.	0	Positive	['pinos']
1308	1	4	41757	Ordered the Antipasto, Bruschette, and a small Margharita pie with sausage. Ã‚Â Bruschette - Fantastic, though I do usually prefer slightly more crunchy bread, it was still great with excellent ingredients on top. Ã‚Â Antipasto - Also very good. Ã‚Â Very fresh mozzarella and tomato, delicious roasted pepper, sundried tomato, olives and some fantastic baked flatbread. Ã‚Â My only critique is the a…	0	Positive	['ordered', 'antipasto', 'bruschette', 'margharita', 'bruschette', 'fantastic', 'crunchy bread', 'excellent ingredients', 'antipasto', 'fresh mozzarella', 'artichoke hearts need', 'different brand', 'pizza', 'consistent', 'italy', 'hard comparison', 'thin crust', 'great pizza']
1309	1	4	41714	Came up here to Brooklyn, which is really "home" but now living in DC...so the 1st order of business as we drive into NY is head over to Brooklyn to get some pies! Peppinos was the closest stop to where we were so be it. We hit the jack pot as Peppinos delivered in every way to satisfying my need for awesome NY Pizza's I took my first bite of the Garlic crisps "WOW" I realized what I have been mi…	0	Positive	['came', 'brooklyn', 'dc', '1st order', 'ny', 'brooklyn', 'peppinos', 'jack pot', 'peppinos', 'ny pizza', 'garlic', 'wow', 'dc', 'real meal', 'margherita', 'diavola', 'wife ...', 'brick oven', 'taste ...', 'nice smiles', 'peppinos', 'town ...', 'ny pizza', 'places ...']
1310	1	3	41722	Stopped at Peppinos for pizza this evening. Ã‚Â Times like this, I wish Yelp would institute a 1/2 star scale because I would really like to give Peppinos a 3.5 star. Ã‚Â However, since I can't (get the hint Yelp), I feel Peppinos is closer to a 3 star than a 4 star. For starters, the pizza here is very good - just not the best I've had in town. Ã‚Â I had a 4 topping pizza with mushrooms, olives …	0	Positive	['stopped', 'peppinos', 'yelp', 'star scale', 'peppinos', "ca n't", 'yelp', 'peppinos', 'olives sausage', 'price', 'peppinos', 'high side', 'finer points ... Ã¢ b']
1311	1	4	41747	So so so good. The pizza was very well done - cheese, toppings, and the like were all exquisite! Crust just the right thickness (I like it when pizza crust is a little thinner). Fresh mozzarella cheese. Pepperoni to die for. Too bad I was just here staying with a friend - I would most definitely order from them in the future. A must in Park Slope, seriously. I know good pizza when I see it.	0	Positive	['crust', 'right thickness', 'pizza crust', 'fresh mozzarella cheese', 'pepperoni', 'too', 'slope', 'good pizza']
1312	1	5	40696	holly pie Batman! Ã‚Â (sorry...the Super Hero Supply shop is only blocks away) These guys cut no corners on the quality of their ingredients. Ã‚Â Toss in brick oven goodness and you've got one heck of a pizza. Ã‚Â Each slice was structured and layered with beauty and solid in the taste dept (quatro staggioni). Ã‚Â I strongly recommend this place.	0	Positive	['batman', 'sorry ...', 'hero', 'supply shop', 'toss', 'brick oven goodness', 'taste dept', 'quatro staggioni']
1313	1	2	41375	Pizza (quatro staggioni) = solid. Ã‚Â Good ingredients: Ã‚Â veggies were fresh, sauce was seasoned but didn't overpower the tomatoes in the base Delivery = substandard. Ã‚Â Called and was quoted a half hour delivery time, took just under an hour. Ã‚Â Both the driver and the person who answered the phone when I called back were indifferent. Advice to Peppinos = Don't overpromise and you won't disa…	0	Positive	['pizza', 'quatro staggioni', 'good ingredients', 'Ã¢ veggies', "n't overpower", 'delivery', '= substandard', 'hour delivery time', 'advice', 'peppinos', "n't overpromise", "wo n't disappoint"]
1314	1	5	40641	So, the hubs and I ended up here after walking across the Brooklyn Bridge and seeing the ridiculous line at Grimaldi's. A quick train ride out to Park Slope brought us to Peppino's, and thank God it did. :) This place is fantastic. Definitely the best pizza I've ever had. We did a half vodka, half ham, artichoke and olive pizza. So ridiculously good. The crust was amazing. We also had some lobste…	0	Positive	['brooklyn bridge', 'ridiculous line', 'grimaldi', 'quick train', 'slope', 'peppino', 'god', 'definitely', 'olive pizza', 'lobster bisque', 'brooklyn', 'crazy wait', 'grimaldi', 'peppino']
1315	1	4	41127	I really like Peppinos - though I do wish they had a more enticing reason for me to stop by more frequently. I live very, very close so I would like to take advantage of their great pizza more often; but unfortunately their really good pizzas are not sold by the slice. Ã‚Â With Joe's pizza being right up the block I often opt for Joe's just for the sake of variety. Admittedly Peppinos has much hi…	0	Positive	['peppinos', 'great pizza', 'good pizzas', 'joe', "'s pizza", 'joe', 'admittedly peppinos', 'regular menu', 'peppinos', 'personally', 'specialty pizzas']
1316	1	5	40611	the exterior of peppino's might trick you into thinking it's just another dingy pizza joint in Brooklyn. Ã‚Â don't be fooled. Ã‚Â inside, you will find friendly and attentive wait staff, crispy brick-oven crust, spicy pepperoni, fresh bufala mozzarella, and the best homemade pasta fagioli i've ever tasted. Ã‚Â go to peppino's now!!!	0	Positive	["peppino 's", 'dingy pizza joint', 'brooklyn', 'crispy brick-oven crust', 'spicy pepperoni', 'fresh bufala mozzarella', "homemade pasta fagioli i 've", "peppino 's"]
1317	1	5	41488	Amazing brick oven pizza delivered to your door. Take that grimaldi's	0	Positive	['amazing', 'brick oven pizza', "grimaldi 's"]
1318	1	4	40659	My husband and I love Peppino's. Up until recently we lived just a few blocks away and it was our go-to place for really excellent brick oven pizza. We were fortunate to live with several excellent pizza options in the hood (Anthony's on 7th is good, and Toby's Public House has some mean pizza too and a dessert calzone to die for). Peppino's ended up winning out against other places though becaus…	0	Positive	['peppino', 'up', 'go-to place', 'excellent brick oven pizza', 'excellent pizza options', 'anthony', 'toby', 'public house', 'dessert calzone', 'peppino', 'great selection', 'crunchy chewy', 'thin crust pizzas', 'fresh Ã¢ homemade sauce', 'fresh mozzarela', 'excellent quality toppings', 'go-to place', 'have', 'great food', 'carmela', 'never', 'amazing pizza places', 'everyday place', 'austin', 'n…
1319	1	4	41768	Okay, so order whole pies from this place and they are great! Single slices not as much so, but the whole pies, especially the " Quattro Stagioni" - tomato sauce, artichokes, black olives, ham, mushrooms & fresh mozzarella kick ass. Solid pizza if you're in the area, but I wouldn't travel too far for it...	0	Positive	['okay', 'whole pies', 'single', 'whole pies', 'quattro stagioni', 'tomato sauce', 'black olives', 'fresh mozzarella', "n't travel"]
1320	1	5	40870	My go to place in the neighborhood. Ã‚Â Decently priced really really good pizza and cheap beer. Ã‚Â Comfortable place to sit with friends. Ã‚Â Just ordered it last night for dinner. Ã‚Â The Margherita and Pizza Biaca are the best.	0	Positive	['decently', 'good pizza', 'cheap beer', 'comfortable place', 'margherita', 'pizza biaca']
1321	1	5	41846	The best pizza folks, i was born in Brooklyn and these people know how to make a pie, Plus its unpretentious and you leave stuffed, The yuppies dont know pizza, this is the best,	0	Positive	['pizza folks', 'brooklyn', 'yuppies dont']
1322	1	5	41634	This has been the best pizza I have had in the area by far. Ã‚Â Fresh basil and mozzarella alone are fantastic, and any topping you add will make it better	0	Positive	['fresh basil']
1323	1	5	40814	In the abundance of water, the yuppies are thirsty. They pop into Campo de Fiori and chomp down on extremely-overpriced crappy gimmick pies while the real old Brooklyn gems are right under their noses. Peppinos has a good brick oven that burns hot enough to make a thin crust that's neither droopy nor brittle. It has good NYC tap water and skilled Brooklyn hands working the dough. The ambiance is …	0	Positive	['campo', 'fiori', 'crappy gimmick pies', 'brooklyn', 'peppinos', 'good brick oven', 'thin crust', 'nyc', 'tap water', 'brooklyn', 'year olds', 'girls', 'grimaldi', 'god', 'fuckin tuesday', 'lombardi', 'pompous', 'ass clientele', 'brooklyn rivals difara', 'totonno', 'dom', "ai n't gettin", 'train past', 'grand army', 'plaza', 'time ...']
1324	1	4	40993	Great & reasonably priced salad..... The delivery was a bit slow but the food was good!!!!	0	Positive	['salad ... ..']
1014	1	4	41336	My friends took me here saying that they had found a place better than Lombardi's. I'm obseeeeeessed with Lombardi's, and with pizza in general lately, so I welcomed the challenger with open arms. We decided on the meatball pizza and started with a caprese and a caesar salad. The tomatoes and mozzarella were huge and pletiful and fresh and tasted great with a splash of balsamic vinegar. I know it…	0	Positive	['lombardi', 'lombardi', 'open arms', 'meatball pizza', 'caesar salad', 'balsamic vinegar', 'caesar salad', 'perfect amount', 'huge', 'thick slices', 'toasty crust', 'lombardi', "n't disappoint", 'great local pizza joint']
1325	1	5	41663	we have been long time fans of Peppinos. without a doubt a must try for delivered pizza, in our opinion they are the best tasting delivered pizza available. never had to wait more than 40 mins. always hot. and most importantly consistant.	0	Positive	['long time fans', 'peppinos']
1326	1	5	40779	Yum. Ã‚Â So, so happy to discover this place only a couple blocks from our new apartment. Ã‚Â It is our go-to for delivery, and is even better straight out of the oven in their cute little restaurant. Ã‚Â I also love that I can get their dough for $3 and try to re-create at home. Ã‚Â We especially love the pizza with Vodka sauce. Ã‚Â Not much else to say... great pizza, friendly service, good del…	0	Positive	['yum', 'couple blocks', 'new apartment', 'vodka', 'great pizza', 'friendly service', 'good delivery']
1327	1	5	41781	Great italian food!	0	Positive	['great italian food']
1328	1	4	41092	Great pizza. Good sauce, quality ingredients, love the fresh basil, crust is great, but had Ã‚Â a couple pies with slightly burnt crust. Also, quick delivery, BUT, make sure to ask the woman on the phone to read your order back to you before you hang up. We've had several orders missing an ingredient or two. Still, our go-to pizza in the slope.	0	Positive	['great pizza', 'good sauce', 'quality ingredients', 'fresh basil', 'couple pies', 'burnt crust', 'quick delivery', 'but', 'go-to pizza']
1329	1	4	40977	Too fast. Ã‚Â That's my complaint. Ã‚Â lol I asked how long an order would take, and I was informed 30-45 minutes. Ã‚Â That was perfect, as I was expecting my boyfriend home in 25 minutes, and he was paying. Ã‚Â Truth be told, they showed up in about 15 minutes, and I was stuck there, feeling like an ass for holding this guy up as we waited the extra ten minutes for my boyfriend to arrive to pay.…	0	Positive	['too', 'Ã¢ lol', 'boyfriend home', 'truth', 'good tip', 'delivery time', 'good possibility', "'ll end"]
1330	1	5	41381	Super tasty pizza! Ã‚Â My favorite delivery in Brooklyn! Ã‚Â I also really enjoy the Caeser salad.	0	Positive	['tasty pizza', 'favorite delivery', 'brooklyn', 'caeser']
1331	1	5	41534	This is the second Peppinos location to open in Brooklyn, with the first in Bay Ridge (same owners). Can't say enough about this place, the food is top quality, the ambiance is perfect, prices are very good and the service is fantastic. I've had a bunch of different dishes from Peppinos and they all have been great. Try the penne alla vodka, with peas, proscuitto and chicken....wow!!! I've also h…	0	Positive	['peppinos', 'brooklyn', 'bay ridge', 'ca', 'top quality', 'peppinos', 'try', 'penne alla vodka', 'chicken ... .wow', 'fresh mozzarella hero', 'spinach ravioli', 'eggplant parmagiana', 'cold antipasto and/or', 'cleaned', 'taste authentic', 'time i', 'complimentary mini foccaccia', 'lastly', 'slice pies', 'different varieties', 'margharita pizza', 'got', 'peppinos', 'great italian food', 'cater ..…
1332	1	5	40824	A girls night in with Natalia O., we ordered pizza (her fave) from Peppinos. It was, for lack of a better word absolutely delicious! If I could give 6 stars for this pizza I would and I'm not a pizza person. The crust was just perfect, the cheese just the right amount of saltiness and the sauce, perfectly sweet and mouthwatering. Delivery took less time than grub hub indicated. About 30 mins. Ã‚Â…	0	Positive	['girls night', 'natalia o.', 'peppinos', 'pizza person', 'right amount', 'delivery', 'grub hub', 'delivered', 'yummy goodness', 'white wine = awesome dinner']
1333	1	5	41341	I am a huge fan of New York pizza, and in my opinion, Pepinnos has the very best pizza in the city. The crust is what makes it great, as it does with all great pizza. It reminds me of the crust at John's Best (for anyone who knows that secret gem up in Mount Kisko). But what makes me love this neighborhood classic more than anything is the excellent service, friendly staff and family atmosphere (…	0	Positive	['huge fan', 'york', 'pepinnos', 'great pizza', 'john', 'secret gem', 'kisko', 'excellent service', 'friendly staff', 'family atmosphere']
1334	1	3	40780	We popped in here while on an apartment search. It was good, by no means the best pizza I've had in NYC. I had the vodka pizza and changed the mushrooms for tomatoes. Do not get me wrong, the sauce was yummy, cheese fresh. My crust was not as crunch as I like it from other places. I prefer Grimaldi's, L&B, Joe & Pat's or Joe's Pizza in the West Village	0	Positive	['apartment search', 'nyc', 'vodka pizza', 'grimaldi', 'joe', 'pat', 'joe', 'pizza']
1335	1	5	41328	I joined Yelp specifically to give this place 5 stars. The food is totally delicious (the bruschetta is totally extra terrestrially delicioustown!) The service was amazing- the waitress and the busboy were attentive and polite. Ã‚Â The place is also just really homey and comfy on a early winter night. Ã‚Â While waiting for the bathroom, I admired all the children's drawing on the wall. Ã‚Â You kn…	0	Positive	['yelp', 'early winter night', "children 's drawing", 'kid draws', 'love you', "ai n't"]
1336	1	5	40881	Love this place. The best bruschetta I have ever eaten, topped with chopped tomatoes and garlic. I am addicted to their spaghetti with garlic and olive oil. And their pizza is incredible too, you can eat all of the crust.	0	Positive	['love', 'olive oil']
1337	1	5	41333	The best pizza I've had in NYC... a little expensive, but worth it!	0	Positive	['nyc']
1338	1	5	40686	One word: AMAZING!!!!!!!!!!!!!! There is no wait here, and service is FANTASTIC! Oh...did I forget to mention the pizza?!? Well watch out Grimaldi's, Peppinos is by far a better pizza.	0	Positive	['amazing', 'fantastic', 'oh', 'well', 'grimaldi', 'peppinos']
1339	1	2	41113	Why does this place exist when it's closed about 75% of the time? No matter what time of day I've gone by, I see it closed. I have only been able to successfully go one time, it happened to be a Saturday night. I went back a few weeks later on a Saturday night, and it wasn't opened. If you can actually go, it's worth it because the pizza was good. However, don't rely on it... and with such random…	0	Positive	["'s worth", 'such random hours']
1340	1	3	41476	Peppino's makes some very solid pizza. The ingredients are top notch, and the dough they use is particularly good. The interior has a family style appeal, great neighborhood place. My only complaint is that the prices are just a tad high for a local pizza joint. Their small plain pizza is $2 more than a small at Totonno's.	0	Positive	['peppino', 'solid pizza', 'top notch', 'family style appeal', 'great neighborhood place', 'tad high', 'local pizza joint', 'small plain pizza', 'totonno']
1341	1	4	41161	if your Italian friend tell you it's a great pizza, you better trust him ;) the pizza is crispy, think and you can taste the fresh mozzarella all over the pizza. the Vodka sauce on a pizza is light and tasty. don't forget the to get the bruschetta for appetizer. Friendly waiters and nice pizzeria. This is the place I diffidently go again to discover their wonderful pizza or great sandwiches again.	0	Positive	['italian friend', 'great pizza', 'fresh mozzarella', 'vodka', 'friendly', 'nice pizzeria', 'wonderful pizza', 'great sandwiches']
1342	1	3	41172	We checked out Peppino's because we were at the Brooklyn Botanical Gardens, and figured we'd take a walk through Prospect Park, grab some pizza, and then take the R train back to Manhattan. It was a bit a of a hike from BBG, but the reviews were so good on Yelp that we had to try it. We ordered the fried ravioli appetizer and they were delicious. Next up a small Margherita Pizza. Bleh. The ingred…	0	Positive	['peppino', 'brooklyn botanical gardens', 'prospect', 'manhattan', 'bbg', 'yelp', 'ravioli appetizer', 'margherita pizza', 'bleh', 'hot day']
1343	1	5	40684	Oh hell yes. Despite a low-end looking exterior, Peppino's makes a delicious, yet affordable, gourmet pie. The margherita is perfect - fresh basil, quality cheese, tangy sauce, chewy crust. Delivery is prompt, the person taking the orders is polite, and even strolling in and ordering a pie To Go doesn't result in an interminable wait. Can't speak to the dining-in experience - I abhor bright light…	0	Positive	['oh', 'hell yes', 'peppino', 'gourmet pie', 'fresh basil', 'quality cheese', 'tangy sauce', 'chewy crust', 'delivery', "n't result", 'interminable wait', 'ca', 'dining-in experience', 'bright lights', 'great go-to pizza place']
1344	1	4	41802	Wow, brick oven pizza....delicious...I ordered something called Quattro Spuglioni?.The slices were hot and fresh, you could taste it's ingredients, the fresh tomato sauce, the basil, the olives,the EVOO(I love you Ms.Ray)the ham,the crispy thin crust and of course the cheese. The waitress was very attentive and friendly. The layout is kind of typical Italian style restaurant, plaid tablecloth, th…	0	Positive	['wow', 'brick oven pizza ... .delicious ...', 'quattro spuglioni', '.the slices', "'s ingredients", 'fresh tomato sauce', 'evoo', 'ms.ray', 'thin crust', 'typical italian style restaurant', 'plaid tablecloth', 'marilyn monroe', 'brooklyn bridge', "crucifix 's", 'pio', 'high praises']
1345	1	4	40852	Park Slope has a place to get good pizza... phew..... For a minute there...I lost myself...I lost myseeeeeelf! This is what you get...when ya mess with us. Families with babies rejoice! great proscuitto. Ã‚Â great tasting dough. Ã‚Â fresh basil. Ã‚Â very nice staff. Ã‚Â great coal oven taste. I know I will be ordering from here much as they have free delivery and they are very pleasant to deal wi…	0	Positive	['slope', 'good pizza ... phew ... ..', 'ya mess', 'families', 'babies rejoice', 'great proscuitto', 'fresh basil', 'nice staff', 'great coal oven taste', 'free delivery']
1346	1	5	40669	It's a local pizza place with great brick oven pizza. The atmosphere is comfortable and it feels like a family-run joint. It's bright inside, so it might not be a great place for a first date. But, if you live nearby, this should be your go-to pizza place. Also: the cheesesteaks here are delicious.	0	Positive	['local pizza place', 'great brick oven pizza', 'family-run joint', 'great place', 'go-to pizza place']
1347	1	5	40715	My Italian friend, Sal, from Brooklyn asked me what I wanted to eat while I was in town visiting for the weekend. Ã‚Â Two things came to mind--cannolis, and brick-oven-fired pizza from a legit pizzeria. Ã‚Â Sal took me here after a long day in the city to get some dinner. Ã‚Â We shared a large margherita pizza with italian sausage ('cause I like my meat, but also love a traditional margherita) an…	0	Positive	['italian friend', 'sal', 'brooklyn', 'legit pizzeria', 'sal', 'long day', 'large margherita pizza', 'italian sausage', 'traditional margherita', 'shrimp oreganata', 'garlic-olive oil sauce', "ca n't", 'delicious rub', 'entire bucket', 'f line', 'sal', "'s place", 'Ã¢ mission']
1348	1	5	40828	mmmmm delishh!!!...staff is very attentive and friendly, food is made fresh with much care...its not ur ordinary pizza spot, its a very cozy sit down resturant, with great choices...loved it here...will come back!	0	Positive	['mmmmm delishh', '... staff', 'care ...', 'ordinary pizza spot', 'great choices ...']
1349	1	3	41083	Pretty good -- and certainly a great option for non-NY style pizza in the South Slope. Nothing to travel for, though. I found the plain pizza to be undersalted and the beer selection isn't so hot. Eh.	0	Positive	['great option', 'non-ny style pizza', 'slope', 'plain pizza', 'beer selection', 'eh']
1350	1	4	41661	Great brick oven pizza...and even better is that they make whole wheat crust! I suggest the whole wheat pie with spinach. Only down side is they don't make a lot of it, so on a busy night, it can be hit or miss if they have it.	0	Positive	['great brick oven pizza ...', 'whole wheat crust', 'whole wheat pie', 'busy night']
1351	1	4	41558	This place has great pizza, good sandwiches and the wait staff is always REALLY nice. Ã‚Â Last time we were there they gave us free bruschetta for the hell of it... oh and they have $3 Peroni!	0	Positive	['great pizza', 'good sandwiches', 'really', 'free bruschetta', '... oh', 'peroni']
1352	1	4	41074	Great sauce. Plain pizza is terrific. No broccoli though :( Also great chicken parm and the bread is fantastic!	0	Positive	['great sauce', 'plain', 'great chicken parm']
1353	1	3	41642	Its hard to impress me food wise so I only give this place 3 stars for now. I went for the first time yesterday since it was in the neighborhood and I decided to take a walk in the snow storm. I ordered a seafood salad, pasta fagioli soup and a margarita pizza with sausage. I am not a pig, I was with my boyfriend and we shared it all. LOL. Ã‚Â The seafood salad was really good but I could have do…	0	Positive	['food wise', 'snow storm', 'seafood salad', 'pasta fagioli soup', 'margarita pizza', 'lol', 'seafood salad', 'seafood salad', "n't good", 'peppino', 'villa']
1354	1	1	40941	Overpriced and mediocre.The Pizza Ã‚Â was burnt on the bottom. and the flavor were sub par. I ordered the veggie pie and the Margarita pizza. $43.90. This is Pizza not caviar. Next..	0	Neutral	['overpriced', 'pizza', 'sub par', 'veggie pie', 'margarita', 'pizza', 'next..']
1355	1	4	41401	This is a very nice time; I'd say hit the bruschetta for the appetizer, & get a pizza & a pasta dish for the dinner (I mean, assuming you go in a group of around 3-4; you might want more or less depending). Ã‚Â Plus-- Peroni is basically only good at places like this. Ã‚Â Get a draught!	0	Positive	['nice time', 'pasta dish', 'peroni']
1356	1	5	41310	My favorite pizza in Park Slope. All their sandwiches are delicious. The meatball parm is a favorite. The staff is extremely friendly.	0	Positive	['favorite pizza', 'slope', 'meatball parm']
1357	1	3	41691	The meatball roll was great, but the brick oven pizza didn't hold up well enough for delivery.	0	Positive	['meatball roll', 'brick oven pizza', "n't hold"]
1358	1	5	41046	Incredible pizza... Ã‚Â crispy crust/delicious toppings and pretty much the friendliest service imaginable. Ã‚Â We ordered four pizzas to take out and they gave us free bottles of soda and free drinks while we waited. Ã‚Â We felt like family.	0	Positive	['incredible', 'pizza ... Ã¢ crispy crust/delicious toppings', 'friendliest service', 'free bottles', 'free drinks']
1359	1	4	40772	We've continued to go to Peppinos and keep find ourselves there because we like it so much. Last night we had a great arugula, red onion and cherry tomato pizza. The service is always friendly and there's always space for us. Pros: Good, friendly service, delicious pizza Cons: Oddly enough, my son hates the tablecloths and always has (he's 5) : )	0	Positive	['peppinos', 'great arugula', 'red onion', 'cherry tomato pizza', 'pros', 'friendly service', 'delicious pizza', 'cons', 'son hates']
1360	1	4	40672	Not your average neighborhood pizza dive! Ranks with some of the city's thin-crust pantheons, both old and noveau. Fantastic calzones, too. BEWARE, does not travel well--not recommended for delivery unless you're pretty close by.	0	Positive	['average neighborhood pizza dive', 'ranks', "city 's thin-crust pantheons", 'fantastic', 'beware']
1361	1	4	41109	A few of the other local delivery places raised their prices and lowered quality, Peppino's website informs they just reduced prices (slightly). If I'm craving traditional Brooklyn plain slice, I'll order from somewhere else, but this is my new default pizza delivery. The cheese steak wasn't bad either.	0	Negative	['local delivery places', 'peppino', "'s website informs", 'brooklyn', 'plain slice', "'ll order", 'new default pizza delivery', 'cheese steak']
1362	1	4	40757	Came here on Thursday for dinner with my parents who were in town. I chose Peppinos because I read a lot of good reviews and it certainly held up to it's reputation. Even with a group of 30 that was piling in when we arrived, the waiters were very attentive and pleasant. We ordered the garlic crisps as an appetizer and shared a large margherita pizza with pepperoni. I absolutely loved the fresh m…	0	Positive	['came', 'peppinos', 'good reviews', "'s reputation", 'garlic crisps', 'large margherita pizza', 'fresh mozzarella', 'flat-as-a-pancake slices']
1363	1	5	41525	Love it! Ã‚Â Had the "Pizza Bianca" or something like that. Ã‚Â White pizza. Ã‚Â Best I've had in the city. Also a neat looking old timey phone booth	0	Positive	['love', 'pizza bianca', 'white pizza', 'old timey phone booth']
1364	1	4	41680	Ok...I love bread...hence I love deep dish pizza's. Ã‚Â It also doesn't help that all my family lives in Chicago. Ã‚Â The thicker the crust, the better. Ã‚Â I even named my dog Gino after "Gino's East Pizza" in Chicago. Ã‚Â I stopped by Peppino's, ordered a mozzarella/tomato, sausage, and a mushroom pizza and thought they were pretty darn good. Ã‚Â The two guys that were working were super friend…	0	Positive	['ok', 'bread ...', "deep dish pizza 's", 'chicago', 'gino', 'gino', 'pizza', 'chicago', 'peppino', 'mushroom pizza', 'pretty darn good', 'coming', 'hawaii', 'york', 'style pizza', 'will', 'hawaiian pizza', 'obvious reasons ...']
1365	1	5	41545	Friggin' good!!! Ã‚Â The crust is THE perfect paradigm of crisp, light chewiness. Ã‚Â And the proportion of cheese to topping to sauce was well balanced (I had margarehita w/pepperoni). Ã‚Â Maybe could have used a bit more basil, but really just a minor offense. Ã‚Â Ã‚Â Casual and comfortable, but very clean and attentive waitstaff. Ã‚Â So happy to find good pizza in the neighborhood...tried some…	0	Positive	['friggin', 'the', 'perfect paradigm', 'light chewiness', 'margarehita w/pepperoni', 'minor offense', 'Ã¢ Ã¢', 'casual', 'attentive waitstaff', 'good pizza', 'neighborhood ...']
1366	1	5	41069	Peppino's is my new neighborhood love for 2 reasons - the brick oven is the bomb and the staff is super friendly and polite. You seriously feel like you are eating over at a friend's house and their "recession special' is perfect - 2 slices (any kind) and a soda for $5 or maybe it's $6, I can't really remember. All I know is that I stopped by for lunch with a former east coaster craving good pizz…	0	Positive	['peppino', 'new neighborhood', 'brick oven', "friend 's house", "'s $", "ca n't", 'old times', 'enjoy']
1367	1	5	41094	I love when you go back again that the experience is just as amazing as the first time! We had the sausage pizza with tomato sauce and I loved that it wasn't too acidy. I love that they're fast and pleasant - this is my favorite and can't wait to try more of their pizzas!	0	Positive	['sausage pizza', 'tomato sauce', "ca n't"]
1368	1	5	41398	Decided on a whim to go to Peppino's with my roommates for a casual Sunday night dinner and boy am I glad we did! The ambiance was exactly what we were looking for - your typical neighborhood pizza place. Very clean, casual, and the waitstaff was very friendly- we felt right at home. Ã‚Â Our pizza was delicious - we ordered a large grilled chicken pie. The cherry tomatoes on it melted in your mou…	0	Positive	['decided', 'peppino', 'night dinner', 'typical neighborhood pizza place', 'chicken pie', 'cherry tomatoes', 'pasta dish', 'great choice']
1369	1	5	41179	Peppino's was a very pleasant surprise. We went there, honestly, because it was chilly and we were too lazy to go out to Di Fara. Ã‚Â We wanted pizza, but something good - not the normal crap that passes for a pie in the Slope. Ã‚Â When we decided against Di Fara, my next thought was Franny's - where else? Ã‚Â But that would've still ended up being a hike for us, and so we figured, no something c…	0	Positive	['peppino', 'pleasant surprise', 'di fara', 'normal crap', 'slope', 'di fara', 'franny', 'peppino', 'margherita pie', "n't outrageous", 'brick oven', 'buck counts', 'usual fare', 'tomato plate', 'tomato plate', 'bad thing', 'brick oven places charge', 'normal pie runs', 'franny', 'obvious art', 'fresh mozzarella', 'pizza sauces', 'real downside', 'extra sauce', 'small cup', 'mini pie', 'different…
1370	1	5	40865	As a resident of South Park Slope, I think I would have to move away if my neighborhood ever lost Peppino's. Ã‚Â What might seem like a slightly-above-average pizzeria/italian restaurant is actually a diamond in the rough. Ã‚Â From my personal fav Grilled Chicken Italiano Sandwich, to my other fav Putanesca Pizza, Peppino's just makes things that taste GREAT. Ã‚Â It might be the brick oven, it mi…	0	Positive	['south park', 'slope', 'peppino', 'slightly-above-average pizzeria/italian restaurant', 'personal fav', 'grilled', 'italiano sandwich', 'putanesca pizza', 'peppino', 'great', 'brick oven', 'unique sauce', 'fresh mozarella cheese', 'go-to place', 'peppino']
1371	1	4	41871	I've eaten here three times and I love it. I've only ever had the regular cheese slices but they're awesome. The cheese is gooey and the brick-oven gives the crust a nice smoky flavor. I only wish the slices were crispier, they are a little too floppy for my liking. Get the recession special, it's two slices and a soda for $5.	0	Positive	["'ve eaten", 'regular cheese slices', "'re awesome", 'nice smoky flavor']
1372	1	4	41000	Just had Peppino's for the first time, I'm ashamed to say. I've lived right next door to the place and have never been over there until tonight, but it was really good pizza. I had a pizza with tomato sauce, garlic, basil and capers (no cheese) and it was awesome.. can't wait to try the others. I got the small, which is 6 slices and I usually can put away a lot of food (see photo) but only ate ha…	0	Positive	['peppino', 'good pizza', 'tomato sauce', "awesome.. ca n't", 'full dinner', 'great neighborhood spot']
1373	1	4	41050	They have a nice little computer set-up where it knows your number via caller ID, then pulls up your address. I just moved and to reward my helpers, I ordered some pizza. When they supplied my old address, I told them I had just moved that day. The man on the phone congratulated me and took the new address. When delivery came, Peppino's sent over 2 two-liters of soda on the house. Thanks guys!	0	Positive	['nice little computer set-up', 'id', 'old address', 'new address', 'peppino', 'thanks']
1374	1	4	41110	Really tasty brick oven pizza with a delicious sauce. Ã‚Â I also love their sausage and peppers hero, though part of what I loved about it was that it was served on almost pizza dough-like bread. Ã‚Â The last time I ordered it, excited for its deliciousness, it showed up on a normal hero. Ã‚Â I was really disappointed. Ã‚Â That said, it was still damn good... just not as good. Ã‚Â Next time I'll …	0	Positive	['really', 'tasty brick oven pizza', 'delicious sauce', 'peppers hero', 'pizza dough-like bread', 'normal hero', 'damn good ...', 'diavolo pizzas', 'peppino', "'s hankerings"]
1375	1	5	41760	Last weekend I ordered a margarita pie and the delivery guy brought two for me because they'd over cooked the crust on the first one (still delicious despite being extra crisp). I was so impressed that they gave me both and I had lunch for the next day...added bonus. Their brick oven gives the pizza a slight smoky flavor absent from most pizzas, setting it apart from the pack. The crust is wonder…	0	Positive	['margarita pie', 'delivery guy', 'extra crisp', 'day ...', 'brick oven', 'slight smoky flavor', 'ny-style', 'yummmmmmmmm']
1376	1	5	41047	I eat here sooooooooo much. Ã‚Â And it's not because I am lazy and it is only a few blocks from my place. Ã‚Â If you are in the mood for Italian Peppino's gives you so many options. Ã‚Â Their Brick oven pie is the best I have ever had. Ã‚Â I have done the Grimaldi's and Lombardi's and I feel this pie trumps it. Ã‚Â Two pies in particular Pizza alla Vodka and the Diavola. Ã‚Â The ingredients are a…	0	Positive	['italian peppino', 'brick', 'oven pie', 'grimaldi', 'lombardi', 'pie trumps', 'pizza', 'vodka', 'diavola', 'than', 'heros', 'chicken parm', 'meatball', 'tomato sauce tastes', 'old family recipe', 'pepinos', 'hero bread', 'brick oven', "ca n't", 'great sauce', 'peppino', 'grimaldi', 'peppino']
1377	1	4	41012	2 words: Quattro Stagioni.	0	Neutral	['quattro stagioni']
1378	1	3	41141	...despite a bad review I previously posted, I made another trip out here and was delightfully surprised. The service was friendly and inviting as were the pizza's. Thin crust was a bit soggy, but the flavors played in my mouth like a perfect concerto that would make any Salieri wannabe jealous. Brick oven and a family environment add great touches but the real hero is the pizzas. I'll make anoth…	0	Positive	['bad review', "pizza 's", 'thin', 'bit soggy', 'perfect concerto', 'salieri', 'wannabe jealous', 'brick', 'family environment', 'great touches', 'real hero', 'pastas ...']
1379	1	4	41667	We LOVE this place. They have quite a few yummy pizza selections and the thin crispy crust ...makes my mouth water just thinking about it. It is expensive, yes, for a pie, but the taste makes it worthwhile.	0	Negative	['love', 'yummy pizza selections', 'thin crispy crust ...', 'mouth water']
1380	1	5	41455	I just finished the "Recession Special," a lunchtime deal of two slices and a drink (root beer in my case) for $5. I hadn't done my research in advance, so I was expecting just an average streetside pizza place. Not the case. The pizza was amazing--thin crust, crisp at the edges and chewy in the center, with the perfect smattering of black freckles on the bottom from the fiery brick oven. Just th…	0	Positive	['recession', 'root beer', 'average streetside pizza place', 'thin crust', 'black freckles', 'fiery brick oven', 'right amount', 'real tomatoes', 'peppino', "'s blows", 'joe', 'pizza', 'prospect', 'work picnic', 'dangerous lunchtime habit', 'recession lasts', 'full pie']
1381	1	4	40813	Really delicious brick oven pizza. I've ordered delivery, and it came piping hot and in a super timely fashion. At the restaurant, service was great and super accommodating, plus we got warm, fluffy bread which is always appreciated. Only downside: the pizza is hella expensive; definitely not what your average "pizza night" would cost.	0	Positive	['really', 'delicious brick oven pizza', 'super timely fashion', 'fluffy bread', 'pizza night']
1382	1	3	41294	I haven't eaten in yet, but delivery wasn't great. Ã‚Â It tasted a little stale and bland. Ã‚Â It tasted like it could have been good if I ate it straight out of the oven though. Ã‚Â It's also pretty expensive... $15 for a small 6 slice pie.	0	Positive	["n't eaten", 'pretty expensive ... $', 'slice pie']
1383	1	5	41215	I'm torn about writing this review: on the one hand, I don't want word to get out that Peppino's is great, and make it all crowded. On the other hand, I think business is currently a little slow, and and I don't want the best pizza in Park Slope to go under. The pizza and sandwiches are both great. Dough is homemade, chewy, with a nice crispiness to the crust (obviously, it suffers a little in de…	0	Positive	['peppino', 'slope', 'dough', 'nice crispiness', 'high-end pizza', 'sauce', 'cheese', 'actual flavor', 'rubbery fatwads lots', 'pizza places', 'toppings', "n't skimp", 'york', 'slope', 'definitely']
1384	1	3	41721	Went on a Tuesday night around 7pm. Ã‚Â We were the only diners besides one lonely guy sitting at one of the tables. Ã‚Â It didn't deter us from giving this place a try. Ã‚Â It's super clean in there with decent decor, which is a plus. Ã‚Â The waitress was also super friendly, another plus. Ã‚Â We ordered a small margherita pizza and one cheese steak to share. Ã‚Â The pizza was bleh, the main rea…	0	Positive	['went', 'diners besides', "n't deter", 'decent decor', 'small margherita pizza', 'cheese steak', 'main reason', 'order pizza', "n't crisp", 'bit rubbery', 'great flavor', 'great hero bread', "ca n't", 'good cheesesteak', 'ny']
1385	3	2	40605	Pretty boring food and bad service: appetizers and entrees came at almost the same time. Would not recommend.	1	Negative	['bad service']
1386	3	2	40730	Food is creative and thought provoking - but make sure you eat before you go. Ã‚Â Portions are ridiculously small and left me feeling short-changed and hungry. Ã‚Â Had the celery oyster stew. Ã‚Â I know it's Brooklyn, but since when did potato and oyster cracker filler cost this much? Ã‚Â The stew scarcely covered the bottom of a cavernous bowl. Ã‚Â Conversation throughout dinner tended to echo o…	1	Positive	['portions', 'celery oyster stew', 'brooklyn', 'oyster cracker filler cost', 'cavernous bowl', 'conversation', 'heard', 'dekalb', "wo n't", 'p.s', 'semi-redeeming', 'squash tots', 'good concept']
1387	3	4	40897	Glad we found this restaurant. Unique dÃƒÂ©cor is comfortable, eclectic and elegant. Wait staff friendly and attentive. Food original and delicious. Fried brussel sprouts were incredible. Rockfish in artichoke broth was wonderful. Can't wait to return.	1	Positive	['glad', 'unique', 'wait', 'fried', 'brussel sprouts', 'rockfish', 'artichoke broth', 'ca']
1388	3	5	40855	I was in Brooklyn last weekend visiting family and we decided to try the relatively new Dekalb's Restaurant in Brooklyn, New York. Ã‚Â What a treat! Ã‚Â The menu is filled with dishes that are creative, economical, healthy, and most importantly delicious. Ã‚Â The wait staff was fabulous, especially Jamie, our waitress. Ã‚Â She was not just pleasant; she understood what was in each dish and gave u…	1	Positive	['brooklyn', 'dekalb', "'s restaurant", 'brooklyn', 'york', 'jamie', 'great advice', 'different needs', 'Ã¢ vegetarians', 'great choices', 'york']
1389	3	5	41819	The decor is so lovely and the menu fantastic. I especially loved the cocktail menu and the friendly bar crowd. The bartender helped us talk to everyone at the bar and really nerd-out about cocktails and specialty liquors. It was a really fun evening.	1	Positive	['cocktail menu', 'specialty liquors', 'fun evening']
1390	3	5	41694	This is a fantastic restaurant - has everything - great service-oriented staff, delicious and creative menu and food presentation, boutique winelist w sustainably farmed options to compliment, and perfect ambiance, complete with local flavor and truly warm, neighborhood feel. Say Hi to Ras when you go, he's the best.	1	Positive	['fantastic restaurant', 'creative menu', 'food presentation', 'boutique winelist w', 'perfect ambiance', 'local flavor', 'say hi', 'ras']
1391	3	5	40820	I am honestly overjoyed to have such an excellent restaurant on my block! Delicious and unique menu, friendly staff, plenty of vegetarian options and amazing atmosphere. The only recommendation I would have is that the seats are uncomfortable (although they look really cool) and could use some cushions. I am dumbfounded that another reviewer didn't like the veggie burger! I would say it is one of…	1	Positive	['excellent restaurant', 'delicious', 'unique menu', 'friendly staff', 'vegetarian options', 'amazing atmosphere', 'veggie burger', 'veggie burgers']
1392	3	5	41581	I can't articulate enough how impressed we are with the food at this new establishment. I have found myself craving every dish I have consumed here the moment I have another opportunity to eat. Therefore we ate dinner their last night and then again today for brunch. The food is not the only aspect of this restaurant to gush over, the staff is warm, friendly, attentive and incredibly capable. The…	1	Positive	["ca n't articulate", 'new establishment', 'ate dinner', 'decor accentuates', 'hard work', 'executive chef', 'fork tender', 'textural integrity', 'silky lamb', 'parsnip gnocchi', 'parsnip pillows', 'flawlessly', 'brussel sprouts', 'indulgent quality', 'such enthusiasm', 'trout dish', 'fish dish', 'peanuts', 'trout sits', 'delicate flaky', "white meat marry 's", 'familiar seafood entree', 'nice th…
1393	3	5	41207	I just moved to the area so I keep finding little things that really warms me up to my new home. Dekalb is certainly of those places a hidden gem. My friend and I were looking for places that would accommodate her special diet. Saw a sign for warm soup. From the outside look like all the other apartments near it just with a garage door not to far from the door making a slight difference. Well I'm…	1	Positive	['new home', 'dekalb', 'special diet', 'saw', 'warm soup', 'outside look', 'garage door', 'door making', 'slight difference', 'well', 'little sign', 'warm place', 'warm colors', 'fresh coffee', 'friendly people', 'coffee cups', 'beautiful deity amazon woman', 'big hair', 'windows ambient', 'soulful music', 'church pew', 'vegetable burger', 'followed', 'parsnip yogurt dessert', 'subtle sweetness',…
1394	3	3	41603	Came for brunch; considering giving it another shot. Very good food, awesome atmosphere--really, but sloppy service. Other reviewers got it right by commenting on the potential, and I too feel that it's really just missing taking itself seriously enough. Our table was given a mix of current and outdated menus, so our vegetarian friend ordered an omelette from the old menu and ended up getting the…	0	Positive	['came', 'good food', 'awesome atmosphere', 'sloppy service', 'vegetarian friend', 'old menu', 'current omelette', 'pretty serious mix-up', 'hope']
1395	3	4	41115	Updated review~~~~~~~ I had an issue with pricing and delivery, and the manager has since gone out of her way to rectify everything. Restaurants that go out of their way to make a customer feel welcomed back and fully satisfied is a sure fire way for the restaurant to make it in this city. I will definitely be ordering food from this place again now. Thank you for taking care of your patrons! Ori…	0	Positive	['updated', 'restaurants', 'sure fire way', 'thank', 'original', 'seamless', 'banana polenta fries', 'turned', 'expensive price', 'never', 'never', 'pricier item', 'bad business practice', 'bad part', 'delivery guy', 'food delivery guys', "'m upset", 'bad business']
1396	3	3	41667	The decor and playlist were a cool. The food is good. The service however is seriously lacking. Over 20 minutes to get draught beer when there are only a few tables full? I really don't get it. Almost an hour to get our food, again it was relatively empty and another table that arrived well after we did got their food first.	0	Positive	['draught beer']
1397	3	5	40801	I saw this place on a walk to the Home Depot- was intrigued by the beautiful exterior. Returned later for dinner with my boyfriend. Staff was super friendly and the atmosphere was fabulous. We were both immediately charmed but also saddened by how most of the dining room was empty. We ordered from the small plates menu- the smoked trout, the pumpkin gnocchi and the brussel sprouts. All was delive…	0	Positive	['depot-', 'beautiful exterior', 'returned', 'staff', 'small plates menu-', 'pumpkin gnocchi', 'brussel sprouts', 'table promptly-', 'entire meal']
1398	3	4	40719	Brunch, dinner, and drinks have all been amazing. I recommend the gnocchi, chickpea salad, sausage, eggs benedict, and coffee. I will agree with an earlier review about the service. All very friendly but kind of clueless. That won't keep me away but it's something to be worked on. Ask about the history about the decor. Very cool. Cocktails take awhile because the bartenders put their heart and so…	0	Positive	['brunch', 'chickpea salad', 'eggs benedict', "wo n't", 'busy dinner shifts']
1399	3	4	40990	Tasty food, stylish decor, friendly staff. I had the kimchi melt brunch. Came with home fries and small mixed greens. $9. It had good flavor and the portion was appropriate. Not too big but definitely filling. Will surely come back. This place is located maybe a block off the Nostrand/Bedford G stop. The neighborhood is actively changing, and there are plenty of nearby joints to check out (Dynaco…	0	Positive	['tasty', 'stylish decor', 'friendly staff', 'came', 'good flavor', 'will', 'nostrand/bedford g', 'nearby joints', 'dynaco', 'black swan', 'project parlour', 'brooklyn stoops', 'colador']
1400	3	2	41310	Meh... I really want to like it. The space is really beautiful and when we arrived for brunch there was a live guitarist. Music was a little loud for the echoing space but it was still nice. But the Eggs Benedict was so bland. For 12$ I don't expect brilliance but I would like to leave at least close to full and satisfied. It's been a long time since I've needed to add salt and pepper to a dish. …	0	Positive	['meh', 'live guitarist', 'eggs benedict', 'long time', 'interesting way', 'amazing hollandaise', 'new place', 'dine', 'that']
1401	3	3	41390	I waited to review this place till the third time I came to give it more chances to impress me... But it continues to lack fundamentally important aspects of a successful restaurant. The three stars is for the quality of the food and beverage, which I would actually give five stars because the chef really knows what he's doing, truly excellent fare. But the food is the only thing that comes out i…	0	Positive	['place till', 'important aspects', 'successful restaurant', 'excellent fare', 'timely fashion', 'empty restaurant', "wo n't", 'multiple drinks', "ca n't", 'defines his/her job', 'place needs', 'aware staff', 'tremendous', 'excellent']
1402	3	5	41066	Went here for the second time. The first time I just had French fries, which were amazing. The second time, I ordered the lamb, chilled corn soup, and bread pudding. What an amazing meal. The soup was sweet with home made sour cream that tasted like heaven. The lamb was to die for. It sat on a bed of bok choi along with apricot sauce. One of the best meals I have had in a long time. I had two dif…	0	Positive	['went', 'french fries', 'corn soup', 'amazing meal', 'sour cream', 'bok choi', 'apricot sauce', 'long time', 'different bread puddings', 'amazing chef', 'damian']
1403	3	3	41842	1) brunch food was good quality. Spouse had eggs Benedict and said the hollandaise sauce was good. I had the frittata -it was pretty flavorful. 2) bottomless drinks were a fail. This is why I give them 3 stars. Bloody Mary's are awful. Basically v8 and vodka. They tried to add spice - it did nothing. No kick. Nada. Go to Maggie browns or head into ft greene/Clinton hill. I asked for a mimosa sinc…	0	Positive	['brunch food', 'good quality', 'spouse', 'benedict', 'hollandaise sauce', 'frittata -it', 'pretty flavorful', 'bottomless drinks', 'bloody mary', 'basically', 'nada', 'maggie', 'ft greene/clinton hill', 'bm', 'eventually', 'williamsburg', 'seemed', 'direct questions', 'nyc', 'country music', 'sad', 'olea', 'local spot']
1404	3	2	40992	Kind of a bummer. As the only game in town (immediate area) I had high hopes for Dekalb Restaurant, especially since at first glance it's a really beautiful space. The front room is what sells you: open and airy, big communal dining table, well kept bar. It feels very welcoming, like a European cafe. The main seating area is a bit drab since it's in the back of the restaurant with much less natur…	0	Positive	['kind', 'immediate area', 'high hopes', 'dekalb', 'beautiful space', 'front room', 'big communal', 'european cafe', 'natural light', 'happy hour wine', 'happy hour', 'bit lame', 'house wines', 'veggie burger', 'deli mustard', 'gnocchi sauce', 'gigantic slab', 'chewy mushroom', 'veggie burger', 'front communal table']
1405	3	5	40862	Excellent atmosphere. Unique and flavorful menu. Wonderful open air dining. Live music and exotic cocktails.	0	Positive	['excellent', 'unique', 'flavorful menu', 'wonderful', 'open air', 'live', 'exotic cocktails']
1406	3	5	41220	Always a good time at Dekalb. The food is made with love and never makes you feel heavy. Also, Jamie is quite the baker and she can make vegan anything tastes amazing. Also, on the weekends you can find live music. The veggie burger is a big meal. I like the soup as well. Ã‚Â They used to have string bean tempura, that was heavenly. Check them out. Stephan the owner is super nice and you can find…	0	Positive	['good time', 'dekalb', 'jamie', 'veggie burger', 'big meal', 'string bean tempura', 'stephan', 'mark', 'good drinks']
1407	3	5	40900	Delicious food and wonderful atmosphere. They could have filled the place with tables but instead opted to leave the front more open with one big dining table and room for piano and dancing The hostess said they do reggae dance parties on Sunday 3-10pm The food: Ã‚Â Great flavor, many options for solo eating or sharing - Ã‚Â Good value Wine options excellent too	0	Positive	['delicious', 'wonderful atmosphere', 'reggae dance parties', 'great flavor', 'good value', 'wine']
1408	3	5	40667	I give this place 5 stars because they made me feel like they wanted me to come here and to like my experience. The wait staff was warm and comforting. The menu selection is not vast, but all the stuff seems good and interesting. I didn't try everything but it's got LOVE written all over it. It's a good place.	0	Positive	['menu selection', 'love', 'good place']
1409	3	3	41406	Overall it's a nice restaurant. Cool atmosphere, interesting menu, nice addition to the neighborhood in terms of variety of cuisine, but the food was lacking. Many of the reviews here convinced me to visit right away, but I left feeling pretty disappointed. My date and I ordered the Asparagus Terrine, Gnocchi appetizer, french fries, and Lamb Tatsoi w/ apricot. The ingredients were definitely fre…	0	Positive	['overall', 'nice restaurant', 'cool', 'interesting menu', 'nice addition', 'asparagus terrine', 'gnocchi', 'french fries', 'lamb tatsoi', 'w/ apricot', 'overall', 'black pepper', 'lack thereof', 'midwest', 'nyc', 'yelp', 'lamb dish', 'brussel sprouts', 'parsney chips ...', 'times kale', 'fresh spinach', 'only one', 'apricot puree', 'pretty helpful', 'practice session']
1410	3	5	41645	Service? Yes. Food? Yes. Ambiance? Yes. Affordable? Yes. Just read a few reviews and went there to find this out. This place is a bit new and all I can hope is they keep their realness. Follow Brooklyn Food Porn on IG for more suggestions and check out this article on them. bkreader.com/2014/02/newÃ¢â‚¬Â¦	0	Positive	['ambiance', 'brooklyn', 'porn', 'ig']
1411	3	4	41470	A new entry to a rapidly changing area of BedStuy, this restaurant is a patchwork of diverse materials and artifacts rescued from many locations around NYC. Interesting, unique decor. The service is friendly, the waitress was cheerful, warm, and very welcoming. The food was delicious, with generous portions of fries with my meal (I ordered the veggie sandwich with a slice of lamb on it). I had to…	0	Positive	['new entry', 'bedstuy', 'diverse materials', 'nyc', 'interesting', 'unique decor', 'generous portions', 'veggie sandwich', 'small menu selection', 'table areas', 'warmer glows', 'ambiance alot', 'overall', 'nice place', 'welcome addition']
1412	3	4	41155	Adorable, chill place w live reggae band saturday night. Service was good though we went when it was pretty empty. Though menu was somewhat limited and a lil' pricey, both entrees were tasty. They were helpful in recommending and accommodating to my food intolerance/sensitivity. 1. Veggie burger w leeks and pickled onion jam 2. Gnocchi w mushroom	0	Positive	['chill place w', 'reggae band saturday night', 'pretty empty', 'food intolerance/sensitivity', 'veggie', 'burger w leeks', 'onion jam', 'gnocchi', 'w mushroom']
1413	3	4	41637	This restaurant is a fun and unique find. We went for a walk one evening and came across this place. The decor is pretty amazing, the food selection is incredibly unique and delicious. They have a decent selection of beer but a great bar for mixed drinks and wine. Highly recommend for a date night or evening out.	0	Positive	['food selection', 'decent selection', 'highly', 'date night']
1414	3	1	41563	Only place in Brooklyn I have been and not welcomed, recommend no one to go. Food is so so.	0	Neutral	['brooklyn']
1415	3	3	40886	So I have a bunch to say about this place...but first a disclaimer: as a native Brooklynite I have been exposed to so many restaurants come and go in this borough, I realize that I have become a bit of an elitist foodie (but only for Brooklyn dining). So please take my comments with a grain of salt: 1. The food really is good. We had the Parmesan sticks that we more like knishes without potato; t…	0	Positive	['place ...', 'brooklynite', 'elitist foodie', 'brooklyn', 'parmesan', 'monk fish', 'real chill', 'steel windows', 'parquet floors', 'hot mess', 'small plates', 'right times', 'people work', 'good space', "n't plan", 'shit out-']
1416	3	3	41030	Very good food. Very creative and fresh. I had the veggie burger with lamb (definitely get it with the lamb if you are not vegetarian), and the FiancÃƒÂ© had the gnocchi. Gnocchi is definitely hand made and very rustic in taste. Sadly had to knock off 2 stars because of service. Don't get me wrong, everyone is VERY nice, but they all appear to be novices in the service industry. Waitress actually…	0	Positive	['good food', 'veggie burger', 'fiancÃ£Â©', 'gnocchi', 'sadly', 'very', 'service industry', 'waitress', "date 's order", 'service skills', 'tighter ship', 'bedtsuy', 'service skills']
1417	3	5	41750	Absolutely die for this spot. Had the pleasure of sharing drinks with Mark (owner/consultant) on several occasions. I wandered in off the street on my first visit and felt transported to a Caribbean dream. The entire restaurant was decorated by Mark, himself, and contains pieces over a century old. Great music, people and oh yes, the food! Words won't do justice, you must go and order the menu fo…	0	Positive	['absolutely', 'mark', 'caribbean', 'entire restaurant', 'mark', 'contains pieces', 'great music', 'oh yes', 'words', "wo n't", 'live', 'backyard garden', 'restaurant epitomizes', 'brooklyn', 'dekalb', 'cheers']
1418	3	5	41811	Dined last Saturday at this lovely restaurant. Ã‚Â Very pretty inside with lots of authentic design ideas. Ã‚Â We loved the live music outstanding accompaniment to dinner Everyone was very welcoming and the food was great. We enjoyed kimchi sandwich Ã‚Â and Ã‚Â two othermsmallmdishesmwhich turned out to be enough for amlightndinner followed by shortbread with lemon curd. Wine pricesmr the most re…	0	Positive	['dined', 'lovely restaurant', 'authentic design ideas', 'live music', 'outstanding accompaniment', 'everyone', 'kimchi sandwich Ã¢', 'lemon curd', 'wine', 'couple moremtomfill', 'amverynenjoyable night nthanks dekalb restaurant']
1419	3	4	41028	I went to Dekalb Restaurant for Sunday Brunch with a large party and I was very happy with the total experience. Ã‚Â The design and dÃƒÂ©cor of the restaurant is comfortable and appealing. Ã‚Â We really enjoyed the live music which was not too loud, as has been my experience in other restaurants, especially if you're sitting close to the performers. Ã‚Â The price was very reasonable. Ã‚Â Between …	0	Positive	['dekalb', 'brunch', 'large party', 'total experience', 'live music', 'different entrees', 'eggs benedict', 'eggs benedict', 'yelp', 'severe food allergies', 'yelp', "daughter 's", 'star review', "daughter 's complaint", "ca n't", 'good conscience', 'pretty exceptional', 'bit bland']
1420	3	3	41875	Would really give it three and a half stars. Went for brunch with my family and we ordered a lot of different things. Eggs Benedict was overcooked...the eggs weren't runny at all, so if I went again I would specify. The blackened scramble was lamb instead of fish but the scallions were a little too powerful. Also, the food didn't come out all at the same time. But it was all plated attractively. …	0	Positive	['went', 'different things', 'eggs benedict', "n't runny", 'live music', 'food allergies', 'atmosphere']
1421	3	4	41707	This was the PERFECT place to take my mom for mother's day-- the food was incredible and I found the prices to be really reasonable (as far as NYC inflated prices go). I can't believe they opened in January and I've missed months of good food...	0	Positive	['perfect', "mother 's day", 'nyc', "ca n't", 'january', 'good food ...']
1422	3	5	41290	Amazing menu, delicious food with awesome ingredients. Ã‚Â The ricotta gnocchi is a must try!	0	Positive	['amazing', 'delicious food', 'awesome ingredients', 'ricotta gnocchi']
1423	3	5	40795	Dekalb Restaurant is a neighbourhood gem that hits all the right notes: great community spirit, lovely refurbished atmosphere, an incredibly friendly staff who all take the time to get to know you, and amazing food. In an era which is increasingly hands-off, it's nice to know that there's still pockets of community like this restaurant. We've been here for both dinner and brunch, and both times t…	0	Positive	['dekalb', 'neighbourhood gem', 'great community spirit', 'friendly staff', 'amazing food', 'dekalb', 'veg options', 'prices', 'lilliputian', 'manhattan', "n't drink", 'creative non-boozy', 'bluestone', 'bloody mary', 'brozost', 'strange food allergy', 'dekalb', 'weekend brunch', 'neighbourhood staples']
1424	3	5	41232	I stopped in here yesterday & I was transported to a Euro vibe oasis. Mark was behind the bar and he is definitely quite the apothecary. Like my fellow reviewers mentioned, I was not rushed and was in fact welcomed like a member of the family. All the workers are local and care about the future of Brooklyn. They have a garden that will house their own home grown produce, which is AWESOME. The res…	0	Positive	['euro', 'vibe oasis', 'mark', 'fellow reviewers', 'brooklyn', 'own home', 'awesome', 'ras', 'stefan', 'fresh air', 'typical restaurant owners', 'sundays', 'dakalb']
1425	3	5	40771	I absolutely love this place! Mark, the man behind the bar has a good head on his shoulders. Friendly, sociable and genuinely excited about what he's doing! Ã‚Â We only came in for a cocktail, and stayed for a few more than that. As a bartender, I appreciate the small but well selected liquor selection. Mark knows his products and you can tell he selected each one of them for a specific reason. T…	0	Positive	['mark', 'good head', 'friendly', 'liquor selection', 'mark', 'specific reason']
1426	3	5	41618	After hearing so many good things about this spot , I decided to take my girlfriend to Dekalb Restaurant for brunch. Needless to say the food was amazing! Due to the fact that Dekalb Restaurant opened in January of this year, there is still a bit of menu restructurin. There were not too many dishes to pick from the brunch menu, however, each dish is outstanding. The polenta banana porridge is cra…	0	Positive	['good things', 'dekalb', 'needless', 'dekalb', 'january', 'menu restructurin', 'brunch menu', 'polenta banana porridge', 'side muesli', 'nice savory edge', 'bacon side platter', 'loved', 'decor', 'highly', 'friendly establishment']
1427	3	4	41157	Great ambience and super nice staff. Came here for brunch and it's so relaxed and fun! The food is so simple but so delicious and full of really beautiful flavors. I will definitely be frequenting this place as it's a great neighborhood joint with class!	0	Positive	['great ambience', 'super nice staff', 'came', 'beautiful flavors', 'great neighborhood joint']
1428	3	5	41165	To say Dekalb is a hidden gem in Brooklyn's Bed-Stuy would be an understatement. I had the privilege of dining there Friday night with some friends and from the moment I walked in the door I felt at home. Our server, Jaime, had extensive menu knowledge and was attentive without being overbearing. I had the mushroom ravioli and tried the lamb, the ravioli was a perfect blend of flavors and the lam…	0	Positive	['dekalb', 'brooklyn', 'bed-stuy', 'jaime', 'extensive menu knowledge', 'mushroom ravioli', 'perfect blend', 'mark', 'ras', 'mark', 'musical performance', 'ras', 'acoustic guitar', 'longstanding staple', 'brooklyn']
1429	3	5	41052	This restaurant is just delicious. A great addition to the neighborhood with a very unique menu. You will want to try everything! The food is cooked with love and you can taste it! I crave the fried brusslesprouts - a must try!!! Service is excellent, they are very attentive and knowledgable about food.	0	Positive	['great addition', 'unique menu']
1430	3	4	40879	Dekalb restaurant is amazing! Really great food and a relaxed atmosphere. Eat the lamb, the Gnocchi, the Polenta fries (!!!!), the brussel sprouts and probably anything else on the menu because it all seems great! Even better, Dekalb is BYOB for the moment so you can get out of there for very cheap. There is a well stocked corner store practically next door with some pretty good beer. Eat here, I…	0	Positive	['dekalb', 'really', 'great food', 'eat', 'gnocchi', 'polenta', 'brussel sprouts', 'dekalb', 'byob', 'corner store', 'pretty good beer', 'eat']
1431	3	1	41347	Truly disappointing. Like The Runner, Dekalb Restaurant devises a rustic menu with eclectic ingredients but fails the average taste test. Whoever made the veggie burger should be hog-tied and forced fed that uninspired mush. I'm not expecting Alice Waters by any means. The poorly executed farm to table concept leaves me craving a good old slice. Ã‚Â They need to reinvent their menu, rethink their…	0	Negative	['truly', 'runner', 'dekalb', 'restaurant devises', 'rustic menu', 'eclectic ingredients', 'average taste test', 'whoever', 'veggie burger', 'alice waters', 'table concept leaves', 'good old slice', 'uneven portions', 'low seats']
1432	3	5	41798	Nice brunch place for an alternative. Ã‚Â Beautifully decorated and extra friendly staff. Ã‚Â Had biscuits and leek leek gravy and Clementine ice cream and shortbread cookies. Ã‚Â Was really stuffed after all that but it all was good and will be back. Ã‚Â Anyone who is into things like sustainability, not wasting food, environment, etc will love the background of the business, which is use everyt…	0	Positive	['nice', 'brunch place', 'beautifully', 'extra friendly staff', 'leek leek gravy', 'clementine', 'ice cream', 'shortbread cookies', 'was', 'heavy metal', 'extra star', 'yelp']
1433	3	5	41211	I had a great experience here! I will start off with the cons to get them out of the way: - No liquor license, yet. But I'm not even sure that's a negative, because it was BYOB. So ... - The seating was a little low for me compared to the table. I'm 5'5" ish and felt like a kid at the grown-up table. - Uh, that's it for the cons. The atmosphere is BEAUTIFUL, all low-lit golden glow and rustic-mee…	0	Positive	['great experience', 'liquor license', 'byob', 'grown-up table', 'uh', 'beautiful', 'golden glow', 'rustic-meets-bohemian sort', 'vegetarian date', 'nice date spot', 'laundry list', 'exotic ingredients', 'butternut', 'squash tater tots', 'bit greasy', '... .but', 'parsnip gnocchi', 'get this', 'kohlrabi kimchi', 'banh mi', 'veggie burger', 'liquor license', "'s hip", 'quick walk', 'g.', 'fuzzy fe…
1434	3	5	40886	what a great place. very low key, good prices, incredible food. the atmosphere is formal yet friendly, excellent date spot. BYOB Ã‚Â for now	0	Positive	['great place', 'good prices', 'incredible food', 'excellent date spot', 'byob']
1435	3	5	41642	This is literally the first yelp review I've ever written - I've never been impressed enough Ã‚Â to bother before now. Ã‚Â Amazing food, gorgeously rustic space with a welcoming atmosphere and attentive and friendly service. The food was beautiful. Quality seasonal ingredients star in a healthy and innovative menu that Ã‚Â follows through in execution. Everything we tasted (most of the menu, beca…	0	Positive	['yelp review', 'amazing', 'rustic space', 'friendly service', 'quality', 'seasonal ingredients star', 'innovative menu', 'thoughtful additions', 'delightful bursts']
1436	3	4	40790	Great food and fantastic friendly informative service. I'm vegetarian and the mix and quality of the ingredients and presentation was spot on, but don't let my vegemess dissuade you. The trout was 'excellent' according to my non vege dining partner. And every appetiser we had was a winner. Currently doesn't have a liquor licence so bring your own - we did , no corkage. Couple of tips - the entree…	0	Positive	['great food', 'fantastic friendly informative service', "'m vegetarian", 'vegemess dissuade', 'non vege', 'currently', 'liquor licence', 'couple', 'order appetisers', 'great flavour', 'overall', 'lovely food', 'great ambience', 'interesting staff', 'great time']
1437	3	5	40901	First of, the decor: the repurposed wood, windows and furniture add amazing character to this space. It's a perfect Sunday brunch spot. The prices are good. Food was tasty and left me wanting to come back and try other things on the menu. The service is so welcoming and more than happy to answer questions about the space and surrounding neighborhood. I hope this place sticks around for a long tim…	0	Positive	['amazing character', 'brunch spot', 'place sticks', 'long time']
1438	3	5	40722	Amazing food- ham, melted leeks, banana polenta, was super great. Braised lamb could add some plain couscous,but super delicious with crispy kale. Decor is also super Brooklyn brownstone inspired, spacious, and almost church-like very warm. Can't wait for the summer when the gates open and the space will feel even more airy. They also have a garden in the back so fresh veges in summer will be nic…	0	Positive	['amazing', 'food- ham', 'banana polenta', 'braised', 'plain couscous', 'super delicious', 'crispy kale', 'decor', 'brooklyn', 'ca', 'fresh veges', 'looking']
1439	3	5	41542	Dekalb is amazing! Ã‚Â I feel like my words can not even do it justice, but I shall try... Ã‚Â The restaurant its-self is inspiring, made of all reclaimed wood, and the old hospital windows lining the ceilings and walls cause the vibes from the awesome band to flow throughout without being loud. Ã‚Â The Staff is friendly, and is eager to welcome you to the neighborhood. Ã‚Â The Mussels are served…	0	Positive	['dekalb', '... Ã¢', 'restaurant its-self', 'old hospital windows', 'awesome band', 'staff', 'mussels', 'creamy salsify', 'leek broth', 'polenta', 'leek ragout', 'serrano', 'ham ... ..someone', 'womans heart', 'perfect combination', 'je ne sais quoi', 'lamb', 'high expectations', '... fork tender', 'root vegetables', 'crispy kale', 'perfect texture', 'soft lamb ... ugh', 'panna cotta sort', 'mind…
1440	3	5	40617	Great spot just opened, Ã‚Â defiantly off the usual path. Ã‚Â But great decor, Ã‚Â exactly staff and food is delicious. Ã‚Â This is going to be the next upcoming place.	0	Positive	['great spot', 'usual path', 'great decor']
1441	3	5	41838	This restaurant is right up my alley. LITERALLY!! (Well, Walworth isn't exactly an alley, but you catch the drift). I work up the block on Willoughby Ave and it is super hard to resist popping in for a bite now. I went there on a date and all of the menu choices were different, appealing, and savory! Tried the mussels and ate them all. My date had the braised lamb. Little known fact: it is B.Y.O.…	0	Positive	['literally', 'well', 'walworth', 'willoughby ave', 'menu choices', 'tried', 'little', 'b.y.o.b.', 'cider', 'bed stuy beer', 'the', 'combo breaker']
1442	3	4	41166	I ate here with my girlfriend last night and we both thought it was very good. Ã‚Â We split the fried brussels sprout to start and I had the almond stuffed trout and she had the vegetable burger. Ã‚Â This place definitely has its own twist on food with some unique combinations of high quality ingredients simply presented. Sort of like the restaurant Ã‚Â itself. Everything in the restaurant is sal…	0	Positive	['brussels sprout', 'vegetable burger', 'own twist', 'unique combinations', 'high quality ingredients', 'sort', 'restaurant Ã¢', 'uws', 'backlit windows', 'old hospital', 'church pews']
1443	3	5	40847	Really good new place, great addition to the neighborhood. Ã‚Â The menu is a little different but super creative. Ã‚Â The food is amazing and all the ingredients are super fresh. Ã‚Â The decor inside is also really cool.	0	Positive	['really', 'good new place', 'great addition']
1444	4	2	41233	I was so excited to try this place out since it's only a few blocks away and looks packed whenever I walk by. Ã‚Â Holy schizza was I disapointed! Ã‚Â We went for brunch on a busy Sunday afternoon and couldn't wait to get our food since we were pretty hungry. Ã‚Â First off, my mimosa was lukewarm. Ã‚Â Second, my fries were lukewarm as well and tasted as if they were cooked 30 minutes ago. Ã‚Â The …	1	Positive	['holy schizza', 'filling ratio', 'entire omelette', 'inch pancake concoction', 'fresh pot', "lady 's cup", 'parisien', 'bad day', 'mediocre food', 'average service', 'ny', 'good note', 'tres french']
1445	4	3	41621	Came for Saturday brunch around 12:30. There were about 4 different groups there. Nice for a budget brunch. Options are limited but you definitely get enough food to fill you. We ordered omelettes so they came with a small salad and fries. The wild mushroom omelette was delicious, but not gonna lie, I was a little skeptical about whether they used real eggs or not. Fries were amazing! so we order…	1	Positive	['came', 'different groups', 'nice', 'budget brunch', 'options', 'small salad', 'wild mushroom omelette', 'gon na lie', 'fries', 'extra side', 'coffee', 'salad', 'staff', 'offered', 'refill coffee', 'checked', 'small place', 'low side']
1446	4	3	41367	The food was good and the atmosphere very nice - but unfortunately the NYC heath inspection reveals several serious violations - nyc.gov/html/doh/html/seÃ¢â‚¬Â¦ Violations recorded in the following area (s) and a Notice of Violation issued at the reinspection conducted on 07/22/2013. "Critical" violations Ã‚Â Violation points: 19 Sanitary Violations 1) Cold food item held above 41Ã‚Âº F (smoked f…	1	Negative	['nyc', 'heath inspection reveals', 'serious violations', 'violations', 'notice', 'violation', 'critical', 'violations Ã¢', 'violation', 'violations', 'cold', 'food item', '41Ã¢Âº f', 'necessary preparation', 'evidence', "facility 's food and/or non-food areas", 'facility', 'vermin proof', 'harborage', 'conditions conducive', 'premises and/or', 'mechanical', 'natural ventilation system', 'disrepa…
1447	4	3	40784	nice ambiance. quiet enough for a table of four to chat and hectic enough to enjoy the crowd of people feeling lively. reservation is 30minutes delayed because there was some confusion over the phone the night before. We ordered mussels which is pretty decent.	1	Positive	['nice ambiance', 'people feeling']
1448	4	3	40673	The food was good, but a bit too creamy for my taste...	1	Positive	['taste ...']
1449	4	4	41847	We had a lovely light afternoon lunch in an area where the choices are limited at 3 p.m. Since it was a quiet time at the restaurant, the waitress gave us lots of attention. It was expensive but worth it. The food was lovely.	1	Positive	['lovely light afternoon lunch', 'quiet time']
1450	4	4	41145	I love this restaurant! My friend booked a table last week for four of us. He looked up in yelp to make sure the food is good. And it didn't disappoint. It was a wonderful dinner. Ideal for small party and date. Definitly will come back.	1	Positive	["n't disappoint", 'wonderful dinner', 'ideal', 'small party', 'definitly']
1451	4	4	41834	Went there last sunday with my gf. We both enjoyed the food - especially the carpaccio and also the mussels were delicious. Try the creme brÃƒÂ»lÃƒÂ©e - it was fantastic!	1	Positive	['went', 'try', 'creme brÃ£ Â» lÃ£Â©e']
1452	4	4	40849	Went on a Tuesday night for a belated Father's Day dinner. Everything we had was very good, nice size portions, you leave satisfied, but not stuffed. We had the pÃƒÂ¢tÃƒÂ© with cornichons (did wish it was more than 2 tiny cornichons) as appetizer, then the red snapper (special), and steak tartar. The wine was also very good, only drawback was that since they don't have a full liquor license, my D…	1	Positive	['went', 'father', "'s day dinner", 'nice size portions', 'tiny cornichons', 'red snapper', 'steak tartar', 'full liquor license', 'dad', 'after-dinner cognac ...', "'s quaint", "n't end", 'overall']
1453	4	4	41667	We loved our experience here. Went for lunch and had fantastic food at really good prices. If you like French food, you need try Le Parisien restaurant. Ã‚Â I have to admit that this place is amazing. Le Parisien has a friendly ambiance and a local feeling. Good place for couples. Their food is fantastic and their steak frites are very hearty and filling. The service was stellar, 5 stars. Oh and …	1	Positive	['went', 'fantastic food', 'good prices', 'french food', 'parisien', 'parisien', 'friendly ambiance', 'local feeling', 'good place', 'steak frites', 'oh', 'clean', 'parisien', 'filet mignon.we', 'great time']
1454	4	4	41596	Nice little french bistro. Ã‚Â The food was fantastic and the service was great. Ã‚Â Took my mom and we had the escargot and I had the duck confit, which was delicious. Ã‚Â The portion seemed smaller but it was perfectly cooked.	1	Positive	['nice', 'french bistro', 'took', 'duck confit']
1455	4	4	40936	Nice small French bistrot with great atmosphere. The food was very good and the service too. A little Paris in New York! Excellent experience, we'll come back	1	Positive	['nice', 'small french bistrot', 'great atmosphere', 'paris', 'york', 'excellent']
1456	4	4	41387	I am a fan!	1	Neutral	[]
1457	4	4	41602	Solid food, nice atmosphere, a bit cramped (but that adds to the atmosphere), and the staff are actually French, which lends a deal of credibility. A bit pricy, but worth it.	1	Positive	['nice atmosphere', 'bit pricy']
1458	4	4	41666	Had a dinner date here during the week - early evening. Ã‚Â My date was rather late, but we were graciously seated when she arrived. Ã‚Â I was so into her that I can't even remember what we ate (I think she had steak frites and I had trout) - the tables are a bit close together so conversation couldn't be too intimate, but overall, I liked the atmosphere and food.	1	Positive	['dinner date', 'early evening', "ca n't", 'steak frites']
1459	4	4	41767	Lovely little french bistro hidden in Murray Hills. Ã‚Â We felt like we were truly in France/paris. Ã‚Â The staff paid excellent attention to us and the dover sole was to die for!!!!!! Ã‚Â Great wine selection. Ã‚Â Very small restaurant but just as cozy as it can be. Ã‚Â I recommend!!	1	Positive	['lovely little french bistro', 'murray', 'france/paris', 'excellent attention', 'dover sole', 'great wine selection', 'small restaurant']
1460	4	4	40712	I went here for a casual business lunch with a new client that I didn't know that well. Ã‚Â The authentic French staff and surroundings had us instantly swapping stories about different trips we had each taken to Paris. Ã‚Â Of course the glass of wine helped, and after a delicious meal (I had the sole, he had the steak frites) we got down to business over coffee and left the meal like old friends…	1	Positive	['casual business lunch', 'new client', 'french staff', 'different trips', 'paris', 'delicious meal', 'steak frites', 'old friends', 'authentic ambiance', 'unobtrusive service', 'great food', 'romantic dionner']
1461	4	4	41355	My wife and I recently found this little neighborhood gem. Ã‚Â It is a wonderfully simple restaurant that executes the bistro concept very well. Ã‚Â We have been back several times and enjoyed it immensely. Ã‚Â A simple but well executed menu, flavorful food and a nice selection of wines accompanied by genuine service. Ã‚Â What more can you ask for in a neighborhood bistro?	1	Positive	['little neighborhood gem', 'simple restaurant', 'bistro concept', 'flavorful food', 'nice selection', 'genuine service', 'neighborhood bistro']
1462	4	5	40870	Sehr geehrte Damen und Herren, Ã‚Â Ich und meine Frau stammen aus Ausland. Wir leben Ã‚Â schon ÃƒÂ¼ber zehn Jahre in Bundesrepublik Deutschland und haben nie einmal gedacht, wie viel AuslÃƒÂ¤nderhass steckt in manchen Deutschen. Aber dass deutsches Gericht diesen Hass unterstÃƒÂ¼tzt, hatte ich nie einmal erwartet. Ich mÃƒÂ¶chte mich kurz fassen. Es geht um das Urteil Im Namen des Volkes des Amtsg…	1	Negative	['sehr', 'damen', 'herren', 'ich', 'und meine', 'frau', 'stammen aus', 'ausland', 'wir', 'leben Ã¢ schon Ã£Â¼ber zehn', 'jahre', 'bundesrepublik deutschland', 'und haben nie einmal gedacht', 'wie viel', 'auslÃ£Â¤nderhass', 'deutschen', 'aber', 'dass deutsches', 'gericht', 'hass', 'hatte ich nie einmal erwartet', 'ich', 'mÃ£Â¶chte mich kurz fassen', 'es', 'geht um das', 'urteil im namen', 'volkes'…
1463	4	5	40969	This place is hidden gem in midtown. First of all, food is great. Steak Frites is my favorite. Their wine sauce on the steak is so good. Escargot is excellent. It was in shell with herbal buttery sauce. It tasted authentic just like I had in Paris. Second, Service is good. Staff was very attentive and extra nice. Lastly, they have a great wine selection.	1	Positive	['frites', 'wine sauce', 'escargot', 'herbal buttery sauce', 'paris', 'staff', 'lastly', 'great wine selection']
1464	4	5	41555	I would definitely recommend this place to anyone, who enjoys the french kitchen. I went there with my girlfriend in January, i had a wonderful "Mussels mariniere" with a lot of taste, and an outstanding soup at the bottom. My girlfriend had a really nice "Duck confit", which she enjoyed very much. For dessert we shared a perfect "Creme brulÃƒÂ©e". When we return to New York, we would love to com…	1	Positive	['french kitchen', 'january', 'mussels', 'outstanding soup', 'duck', 'creme', 'york', 'french meal']
1465	4	5	40997	An unpretentious authentic French bistro on 33rd between Park and Lex. The dining room is small and relaxed with several booths and small tables, I don't think it could seat more than 30 total. .A lot of typically French signage and memorabilia. Service was very attentive. Ã‚Â Music was low and mellow. Ã‚Â It's difficult to find a relaxed place for a quick lunch this far up in mid-town. Ã‚Â Food …	1	Positive	['unpretentious authentic', 'french bistro', 'lex', 'small tables', '.a lot', 'french signage', 'Ã¢ music', 'quick lunch', 'onion soup', 'steak frites', 'Ã¢ salad', 'french bistro', 'compares food wise', 'artisanal', 'expensive affair', 'madison', 'parisien', 'informal lunch', 'business lunches']
1466	4	5	40702	We are first time visitors to NY, and had a wonderful meal at Le Parisien. A small restaurant, with a very friendly vibe. Coq au Vin was excellent, as was everything else, including the nice conversation with the folks at the next table (one of the pleasures of a small restaurant).	1	Positive	['time visitors', 'ny', 'wonderful meal', 'parisien', 'small restaurant', 'friendly vibe', 'coq', 'vin', 'nice conversation', 'small restaurant']
1467	4	5	40727	The most amazing food i've had in New York so far! I had the pate to start and the mussels for main- beautiful flavours and good sized portions. mum had a pear and walnut salad to start (she still can't stop talking about it!) and salmon for main. Service was great and the wine was delicious. 5/5, highly recommended!	1	Positive	["amazing food i 've", 'york', 'beautiful flavours', 'walnut salad', "ca n't"]
1468	4	5	41127	Great value for your hard earned dollars! Food was tasty, portions were generous and service was excellent! Ã‚Â If you are looking for a fancy French restaruant, Le Parisein may not be your choice. But if you are looking for real French food, unintimidating and real down to earth atmosphere, you must come here. We enjoyed all the 3 apeptizers that the owner recommended, escargot was served with r…	1	Positive	['great value', 'french restaruant', 'parisein', 'real french food', 'earth atmosphere', 'real shells', 'duck confit', "n't feeling", 'french onion soup', 'onion soup', 'sweetness Ã¢', 'sweet onion', 'steak tartar', 'france', 'marseilles', 'brooth home', 'real hand', 'creme brÃ£ Â» lÃ£Â©e', 'right amount']
1469	4	5	41617	I really enjoyed this place. The atmosphere was quaint, the staff are very friendly, and they had a nice selection of Ã‚Â food to choose from. I ordered the croque monsieur. It was very tasty and I enjoyed it a lot. It also came with a salad on the side. Ã‚Â The owners are French so when it comes to generating that French bistro feel, they know what they're doing. i will come back.	1	Positive	['nice selection', 'Ã¢ food', 'croque monsieur', 'french bistro']
1470	4	5	41791	Found this restaurant here on yelp. Superb service and food. Very small and direct service with staff. Food is excellent and at a good price for the quality. A definite find and somewhere I would return to.	1	Positive	['found', 'superb', 'direct service', 'good price']
1471	4	5	41753	My 3 previous reviews of this place have been filtered out by Yelp's obviously crude and poorly-tuned filter. I might jokingly say "Help! I'm a prisoner in Yelp's program!" I persist because I enjoy seeing whether honest human communication can survive in an increasingly computerized world. I find this the most comfortable and enjoyable restaurant in the neighborhood, lunching there once a week o…	1	Positive	['previous reviews', 'yelp', 'yelp', 'honest human communication', 'enjoyable restaurant', 'nice construction', 'bordeaux', 'malbec', 'cote', 'rhone', 'mussels', 'cauliflower soup', 'happy', 'new year']
1472	4	5	41057	I took a very demanding foodie friend out to dinner here and even he was impressed... Truly charming and relaxed restaurant with fantastic food and service. The goat cheese salad was delicious, the steak frites were cooked to perfection and the tarragon roasted chicken was full of flavor. A faultless Ile Flottante gave the meal a great finish. Wtih good wine to hand to set off the food and welcom…	1	Positive	['foodie friend', 'truly', 'fantastic food', 'goat cheese salad', 'steak frites', 'ile flottante', 'great finish', 'wtih', 'good wine', 'attentive service', 'great evening', 'excellent', 'enjoyable meal', 'perfect french bistro', 'york']
1473	4	5	41838	Great little French bistrot Ã‚Â in Murray HIll. It s like being in Ã‚Â Paris. Ã‚Â I had the French onion soup and the roast chicken. Both dishes were excellent. Ã‚Â Service was very attentive and prices very reasonable. They are serving a $ 12.95 Prix fixe brunch Saturdays Ã‚Â and Sundays.	1	Positive	['great little french bistrot Ã¢', 'murray hill', 'paris', 'french onion soup', 'roast chicken', 'Ã¢ service', 'fixe brunch', 'saturdays', 'sundays']
1474	4	5	40972	This place is a find. It is located a so close to my office, I don't understand how I never noticed it before. I picked it to have dinner with a very dear friend based on location, having a hankering for French and the reviews. Everything was delicious. We stayed for hours, no rush. Great food, great service. Can't wait to go back!	1	Positive	['dear friend', 'french', 'great food', 'great service', 'ca']
1475	4	5	41853	Great food. Ã‚Â Very small place with maybe 12 tables, but was cozy. The French onion soup and the creme brulle were the best ever for me. My dining companions had the steak and frites as well as the escargots and were well- pleased. Ã‚Â Prices were quite reasonable for Manhattan. Ã‚Â Only negative for me was that they had only beer and wine. Ã‚Â So, I had to forego my pre-dinner martini. Ã‚Â But…	1	Positive	['great food', 'small place', 'french onion soup', 'creme brulle', 'prices', 'manhattan', 'pre-dinner martini']
1476	4	5	41495	I had dinner there last night with my wife and it was wonderful,the food was excellent,the service impeccable,we felt like we were in Paris,we are going back for brunch.It's so worth it,you can't be deceived.	1	Positive	['paris', "brunch.it 's", "ca n't"]
1477	4	5	41687	Great food. Great service. Reasonable pricing. Very cozy.	1	Positive	['great food', 'great service', 'reasonable pricing']
1478	4	5	40892	We checked online before we went and saw amazing reviews and YELP did not let us down. This small, authentic little French Bistro came with good food, lovely ambience, and even better wine. Great date place, will definitely be back!	1	Positive	['amazing reviews', 'yelp', 'bistro', 'good food', 'lovely ambience', 'great date place']
1479	4	5	40721	Le Parisien is what NYC was missing. An authentic french bistro. Period. The atmosphere is real (Christian, the owner, professional and friendly, Ã‚Â was born in Paris, and has worked in the best restaurants in NY for 20 years), the food is to die for and very affordable (classic dishes like escargots, frisee lardon poached egg, pate, soupe du jour, steak frites (home-made), confit de canard, etc…	1	Positive	['parisien', 'nyc', 'authentic french bistro', 'period', 'paris', 'ny', 'frisee lardon', 'soupe du jour', 'steak frites', 'etc ...', 'cod fish', 'black olives', 'pumpkin risotto', 'moules frites', 'etc ...', 'different options', 'french native', 'new restaurant', 'great date place', "'s cosy", 'bon']
1480	4	5	40678	I love this place. Great burgers, steak sandwiches, shrimp blt and great brunch!!!	1	Positive	['great burgers', 'steak sandwiches', 'shrimp blt', 'great brunch']
1481	4	4	41095	Intimate warm setting. The mussels and crime brÃƒÂ»lÃƒÂ©e were standouts although I did not crack the brÃƒÂ»lÃƒÂ©e to my friends' expectation. I like creme brÃƒÂ»lÃƒÂ©e, and like even more when autocorrect corrects it to crime brÃƒÂ»lÃƒÂ©e, but I do not fold under other's demands of my creme brÃƒÂ»lÃƒÂ©e breaking methods, regardless of the social consequences and specially on my birthday. Ã‚Â You…	0	Positive	['intimate', 'warm setting', 'crime brÃ£ Â» lÃ£Â©e', 'brÃ£ Â» lÃ£Â©e', 'creme brÃ£ Â» lÃ£Â©e', 'autocorrect corrects', 'crime brÃ£ Â» lÃ£Â©e', "'s demands", 'creme brÃ£ Â» lÃ£Â©e', 'social consequences']
1482	4	5	41309	cozy atmosphere and warm and reasonably-priced food. perfect for a Christmas date. portion is also enough. not small. we had Le Parisien Salad - simple and fresh! beef liver - should have asked well done! half chicken - OH great! definitely go eat again.	0	Positive	['cozy atmosphere', 'christmas', 'parisien salad', 'beef liver', 'oh']
1483	4	5	41105	Came with family while I was visiting place is small and quaint. Brunch deal cant be beat in the city.	0	Negative	['came', 'brunch']
1484	4	4	40606	Staff are friendly and seated us promptly If the restaurant was advertised on Craigslist it would be described as "cozy". It's crowded and small but this creates it's own atmosphere and often end up speaking to the table next door. Definitely book. Turning up and expecting a seat will promptly have the whole restaurant turn to you, point, laugh and throw their unwanted scraps at you. The food is …	0	Positive	['staff', 'craigslist', 'own atmosphere', 'definitely', 'turning', 'whole restaurant', 'price range']
1485	4	4	41122	Unpretentious Delight! There are so many world class restaurants in Manhattan competing for the diner dollar serving overpriced food overwrought with gimmicks that I'm almost expecting my Buddakan server to grace the table laden in 'flair'. Ã‚Â Enter Le Parisien. Located mid-town east Murray Hill (lots of legal street parking within 3 or 4 blocks P metered so don't forget to print, pay and displa…	0	Positive	['unpretentious delight', 'world class restaurants', 'manhattan', 'diner dollar', 'food overwrought', 'buddakan', 'table laden', 'enter', 'parisien', 'located', 'murray hill', 'legal street', 'tight space', '% banquet', 'french door window', 'multi-million dollar decor', 'wooden school chairs', 'waiter', 'owner stands', 'wine Ã¢', '$ 20- $', 'frites', 'rainbow trout', 'almondine', 'duck confit', …
1486	4	4	41084	I'm a huge fan of duck, and their duck is awesome--the french onion soup is amazing too! Overall the food is very good and the staff is nice, but the restaurant is pretty small; it can be a little tricky getting up.	0	Positive	['huge fan', 'french onion soup', 'overall']
1487	4	5	41074	Such a delicious gem in the city! Perfect for a date or a night out with the girls! Highly recommend the vegetarian pasta dish alongside a glass or two of pinot noir!	0	Positive	['delicious gem', 'perfect', 'highly', 'vegetarian pasta dish', 'pinot noir']
1488	4	4	41490	Came here for the $15.95 brunch with 2 girlfriends. The place is definitely a hole in the wall but OH SO GOOD!! It has something charming about it. Our brunch was intimate, but only because they sat us babies in the corner. Anyone sitting in the middle shares space with other groups - unfortunate, yet very common in little gems in NYC. I had the poached eggs with salmon gravlax and my friends had…	0	Positive	['came', 'oh so good', 'middle shares space', 'nyc', 'salmon gravlax', 'eggs florentine', 'steak frites', 'fat selves', 'apple compote']
1489	4	5	41786	Had a romantic brunch. Cozy spot by the window. Did poached eggs and salmon; great amount of food for the price. Ã‚Â Good service too. Planning on returning to try it for dinner. Ã‚Â Highly recommend this place. Ã‚Â Can't wait to go back.	0	Positive	['romantic brunch', 'cozy', 'great amount', 'good service', 'highly', 'ca']
1490	4	5	40805	WOW! I was not expecting to find my new favorite restaurant when I walked into this small bistro. I ordered the soup du jour- tomato soup, the duck confit, and the tart tatin for dessert. Everything was phenomenal! The bread (we asked for olive oil) was perfect in the soup and alone. The soup was some of the best I have had and the duck fell off the bone. I have worked in a french bakery and eate…	0	Positive	['wow', 'new favorite restaurant', 'small bistro', 'soup du jour- tomato soup', 'duck confit', 'tart tatin', 'olive oil', 'french bakery', 'nyc', 'french places', 'balthazar']
1491	4	2	40625	Charming but crowded. Ã‚Â They have to move tables around just so you can get in and out of your seat. Ã‚Â Staff was nice and attentive though. Asides from being salty, small portioned, and overpriced, the food wasn't memorable. Ã‚Â I had the _ duck confit with some potato slices and withered greens underneath ($25). Ã‚Â _ French onion soup ($9) was okay. Ã‚Â Their _ apple tart was sweet and sour.	0	Positive	['charming', 'staff', 'asides', '_ duck confit', 'potato slices', 'greens underneath', 'Ã¢ _', 'french onion soup', '_ apple tart']
1492	4	4	41120	Great food! We had artichoke salad, spinach salad, Steak, mussels and pasta and everyone was satisfied!	0	Positive	['great food', 'artichoke salad', 'spinach salad']
1493	4	3	40742	I really enjoyed Le Parisien, I just don't know if it's memorable enough for 4 stars. Let's call it 3.5 - my first ever half-star. Judging against the endless sea of options in NYC, if my friends booked dinner there, I would be happy to go. I probably wouldn't seek it out myself for a second trip back because I would rather try something new. Our table had the duck and the steak, and both plates …	0	Positive	['parisien', 'judging', 'endless sea', 'nyc', 'same-day reservation']
1494	4	4	41562	charming spot, great food, friendly but professional staff was not prepared for how quickly the food came out---my only suggestion would be a breather before dessert Ã‚Â (floating islands---to die for!)	0	Positive	['charming spot', 'great food', 'professional staff', 'dessert Ã¢']
1495	4	5	41382	This place is a diamond in the rough. Ã‚Â It's one of the reasons why you should never judge a book by its cover. Ã‚Â At first glance, the place is really small with 2 person tables...and not many of them. Ã‚Â If you are a party of more than 4, I doubt they will be able to seat you timely because the place is packed. Ã‚Â Having said that...the food was excellent. Ã‚Â I ordered the eggs Benedict a…	0	Positive	['person tables ...', 'benedict', 'perfectly', 'delicious fries', 'Ã¢ service', 'elegant place ... .this place', 'excellent Ã¢ food', 'must']
1496	4	4	41027	Great food at surprisingly good prices! I like this cozy little restaurant, only thing I wasn't too fond of was the service. Not the worst I've received but definitely needs some work... Everything we ordered other than our mains - like bread and water took waaay too long and the waiter was quite unfriendly. Maybe it was an off day but everything else was great so I'll sure be back :)	0	Positive	['great food', 'good prices', 'work ...']
1497	4	4	41127	Somewhat small space, so expect to get cozy. :) Fantastic food!	0	Positive	['somewhat', 'small space', 'fantastic']
1498	4	3	40606	Great food, poor service. Ã‚Â We had a 7:15pm reservation but came early to find the restaurant empty. Ã‚Â We explained that our friends were meeting us at the reservation time but asked if we could sit down at a table, have a bottle of wine and wait. They were happy to oblige. Ã‚Â However, when our friends arrived (on time for our reservation) they came to the table to tell us that we would have…	0	Positive	['great food', 'poor service', '7:15pm reservation', 'restaurant empty', 'reservation time', 'empty tables']
1499	4	5	41627	Came here for a double date on a Saturday night. We had reservations for 6pm but we came a little earlier. We were greeted by a friendly host who sat us right away. We were surprised that the place was practically empty, however, that did not last long. In no time it was filled with people. It's a really cute, small restaurant that has a classic feel to it. There is a large selection of wine. The…	0	Positive	['came', 'double date', 'friendly host', 'small restaurant', 'large selection', 'good food', 'delicious appetizers', 'white wine sauce', 'baby spinach salad', 'goat cheese', 'special sauce', 'calf liver', 'yum', 'bistro steak', 'dessert', 'creme brulee', 'yessssssss', 'apple tart', 'overall', 'def', 'will']
1500	4	4	41125	I don't believe they do cocktails, I saw nothing but wine behind the bar. I did however have a nice glass of dry Chardonnay that was recommended by the waiter. The bread was kind of burnt and hard and the butter was too cold. The endive salad is literally the best thing I've had in awhile; roasted pears, Roquefort cheese, walnut, port vinaigrette... I almost ordered another one.The Escargots with…	0	Positive	['nice glass', 'chardonnay', 'endive salad', 'roquefort', 'port vinaigrette ...', 'escargots', 'garlic butter', 'atlantic salmon', 'vegetable risotto', 'saffron sauce', 'strange thick', 'orange component', 'different entree', 'los', 'right consistency', 'puff ratio', 'good experience']
1501	4	1	41393	Saw so many good reviews and was excited to try this place out. Went on a Sunday night around 8 pm and we were greeted by an INCREDIBLY rude host who came over to us and said, "Yes?" Errr. WHAT?! Excuse me, but you do NOT greet your customers that way. Then he asked us whether we had a reservation, and we said no. He told us the wait would be 30 minutes and ignored us, before we even said we want…	0	Positive	['saw', 'good reviews', 'went', 'incredibly', 'rude host', 'errr', 'what', 'excuse', 'not']
1502	4	4	40995	Got here right at 12PM when they opened for brunch on Sunday. Thank goodness because by 12:30pm there was a wait Great food for $15.95 AND you get a coffee, OJ, sangria or Mimosa with your meal. Service was fast, prompt, friendly and food was out in a jiffy. Omelette's were simple and scrumptious. Croquette with ham and cheese on brioche was very soft and flavorful. My smoked salmon eggs Benedict…	0	Positive	['got', 'thank', 'great food', 'and', 'oj', 'mimosa', 'omelette', 'croquette', 'salmon eggs', 'benedict', 'side salad', 'and', 'overall', 'successful experience', "'ll def"]
1503	4	4	40811	I went in for lunch yesterday while searching for another restaurant in the neighborhood. The staff were very personable and funny, as well as attentive. I will definitely be going back!	0	Positive	[]
1504	4	4	40905	small intimate lovely place. great food & wine. very kind and knowledgable hotsts. recommend escargots, steak frites and onion soup which was not salty and perfect for a chilly day!	0	Positive	['small intimate', 'lovely place', 'great food', 'knowledgable hotsts', 'steak frites', 'onion soup']
1505	4	4	41810	One night, my friend and I were stressed at work and decided we needed a "night in Paris". So, we stopped by this place after our oh-so-stressful jobs. I was a bit worried because I hadn't made reservations but we were seated immediately, even though the place was full (it was a Monday night). First off, it's situated in a quiet part of the city - accessible by the 6 train. We ordered the mussels…	0	Positive	['paris', 'oh-so-stressful jobs', 'quiet part', 'so', 'flavorful risotto', 'deeelish', 'average cost', 'french food', 'huge fan', 'french']
1506	4	4	41652	One of my favorite spots in the city for a sleepy brunch. They don't open until 11:00, and the place is very small, but the Parisian vibe is really perfect for a homey cafe style with a friend of two.	0	Positive	['favorite spots', 'sleepy brunch', 'parisian', 'homey cafe style']
1507	4	5	41779	A quaint little restuarant. Ã‚Â Not too much seating so make sure you get there early. We got there and no one was there by the time we ordered no empty seat left. The food was delicious I had the duck confit with crispy potatoes and wild mushrooms. I ate it all, the duck was so tender the potatoes were cooked perfectly crispy.The desser was aesome as well I tried the Apple Tart and Ã‚Â Profitero…	0	Positive	['empty seat', 'duck confit', 'crispy potatoes', 'wild mushrooms', 'crispy.the desser', 'apple tart', 'profiterole', 'apple tart', 'profiterole']
1508	4	5	41207	The Pan Roasted Half Chicken and Braised Duck Leg were awesome. Ã‚Â The chicken was in a brown sauce, while the duck has a salty savory taste. Ã‚Â Both were crispy on the outside. Ã‚Â I also recommend getting a side of their fries. For desert, the profiteroles ice cream and chocolate sauce were to die for. Ã‚Â The ice cream had a vanilla flavor. The cafe americano and creme brulee were good, but …	0	Positive	['pan roasted', 'braised duck leg', 'brown sauce', 'salty savory taste', 'profiteroles ice cream', 'chocolate sauce', 'ice cream', 'vanilla flavor', 'cafe americano', 'creme brulee']
1509	4	4	41595	The artichoke salad is ridiculously good	0	Positive	['artichoke salad']
1510	4	2	41354	Four of us went for dinner. Ã‚Â Everything was edible, but not a single appetizer or entree or dessert was better than mediocre. Ã‚Â The service was neither rude nor gracious, but it was certainly not very professional. Ã‚Â I think there are many other French bistros in New York where the prices are similar and the cooking far better.	0	Positive	['french bistros', 'york']
1511	4	5	41662	The first word that comes to mind is authentic. Ã‚Â Every time I walk into Le Parisien I am reminded of several of my favorite meals in Paris. Ã‚Â The space is small and the decor is a bit sparse but the service and food are truly outstanding. Ã‚Â Everything I have tried has been wonderful; from the french onion soup to the trout almondine and to the steak frites which is anything but basic. Ã‚Â …	0	Positive	['parisien', 'favorite meals', 'paris', 'bit sparse', 'french onion soup', 'trout almondine', 'steak frites']
1512	4	4	41249	Had Calf's liver and Carpaccio. Both were delicious.	0	Positive	['calf', "'s liver", 'carpaccio']
1513	4	5	41584	Close to getting your Paris fix, lovely French dÃƒÂ©cor in a cozy place. Very decent wine list and no more than 10 minute wait during a fairly busy dinner time. My escargots were not bad at all. Customer service was good. I enjoyed myself.	0	Positive	['close', 'paris', 'lovely french dÃ£Â©cor', 'cozy place', 'decent wine list', 'busy dinner time', 'customer']
1514	4	5	41326	This is really authentic French food and it tastes better than I remember it in France. It's homey and small, the chairs against the walls are not comfortable, but the food is delicious. Their house bordeux has a sweet finish which i am not accustomed to so i stuck with the malbec. Started with escargot and it tasted so good, it was drenched in butter. The smell from the next table made me order …	0	Positive	['french food', 'france', "'s homey", 'house bordeux', 'sweet finish', 'started', 'table order', 'escargot butter', 'steak frites', 'french onion soup', 'french onion soup i', 'super soggy', 'stove way', 'wine sauce', 'extra crispy', 'bread til']
1515	4	2	41467	I came here today for a girl's brunch for the first time. We got there pretty early so we got a table right away. We all ordered from the Prixe Fixe menu which was $15.95 for eggs, salad, french fries and a choice of a drink. Overall, the food was pretty good, and the price was reasonable. However, there were a few problems with the service, which we weren't too pleased about, primarily because t…	0	Positive	["girl 's brunch", 'prixe fixe', 'french fries', 'overall', 'staff Ã¢', 'mind', 'plain rude', 'quick eaters']
1516	4	4	41572	Great find! What's with brunch places on 33rd and 3rd? So many, so good, so cheap! We came for the brunch deal of $15.95 for entree and drink. I got the Poached Eggs with Salmon Gravlax with Sangria. Definitely recommend getting the Sangria, it's huge! A lot bigger than the mimosa that comes in a tiny champagne glass. The food was phenomenal. There was a lot of salmon. The poached eggs were just …	0	Positive	['brunch places', 'poached eggs', 'salmon gravlax', 'sangria', 'definitely', 'sangria', 'tiny champagne glass', 'right amount', 'short wait']
1517	4	5	41742	For a location so well located to all attractions and sights in NYC I am blown away by the price. Ã‚Â This location is very cozy, i would say unless you are a snob, which most people that come here are not you sit so close to the neighboring tables that it is almost impossible not to have a conversation or be engaged with them. Ã‚Â The bathroom is so close to the back that you almost feel as you …	0	Positive	['nyc', 'good young blood hipster', 'paris', 'good food', 'energetic atmosphere', 'easily', 'duck confet', 'onion', 'soup i', 'sweet potato fries', "ca n't", 'nyc', 'blue moon', 'special occasion', 'reservations', 'wine']
1518	4	4	41400	Steak frite is amazing. And def get the crume brulee for desert!!!! It's a real French brÃƒÂ»lÃƒÂ©e :). Bon appetite!	0	Positive	['steak frite', 'crume brulee', 'real french brÃ£ Â» lÃ£Â©e', 'bon']
1519	4	5	41456	This place is so adorable and its one of the few places I will keep going back to. The food is very French, the wine selection is good and the service is stellar. Note that the place is tiny and there is little elbow room. You will not do well to bring a bunch of shopping bags.	0	Positive	['wine selection', 'elbow room']
1520	4	1	41024	This place does NOT deserve 4 stars. The smoked salmon was old and tasted horrible, the English muffins on the eggs florentine were soggy and the omelette was greasy. The website made this restaurant seem upscale but it was cramped and shabby. There was one small toilet next to the kitchen. I trusted Yelp and wanted to bring my friend to a beautiful French restaurant for brunch. She was disgusted…	0	Negative	['not', 'english', 'eggs florentine', 'small toilet', 'yelp', 'beautiful french restaurant', 'place rate']
1521	4	5	40805	The space was tight but the food was excellent.	0	Positive	[]
1522	4	4	41503	Decent little brunch place. Their $15.95 brunch set is sweet. Loved their sangria (hmm...) Pros: -$15.95 gets you a choice of coffee/OJ/mimosa/sangria plus an entree. Good deal! - they have around 8-10 entree choices to choose from (not bad) - both of our entrees were very large portions (my kind of style) - the food came out in less than 15min so it was perfect since we were in a rush -they have…	0	Positive	['decent', 'brunch place', 'loved', 'hmm ...', 'pros', 'entree choices', 'large portions', 'rush -they', 'small clean bathroom', 'back -decent service', 'cons', "-it 's", 'small place', 'people -the', 'cute place', 'quick brunch', 'long brunch', 'good sangria']
1523	4	5	41308	Very good food, reasonable prices, the ambiance of a french bistro.	0	Positive	['good food', 'reasonable prices', 'french bistro']
1524	4	3	41268	Escargot: Average: buttery and garlicky. Country Pate: Lacked flavor Duck Confit: a little on the salty side but great with the mushrooms! Steak frites: YUM! amazing sauce and perfectly cooked.	0	Positive	['escargot', 'average', 'pate', 'lacked', 'duck confit', 'salty side', 'steak frites', 'yum', 'amazing sauce']
1525	4	4	41776	I can't wait to come back for dinner! Dinner for 2 seated promptly at 7:15pm (reservations via OpenTable). Small restaurant (40-50 persons), completely packed. We had a cozy booth next to the bar/cashier. Shared a bottle of Prosecco very reasonably priced at $39 ($12/glass). Overall the wine list is not so pricy. My friend ordered the STEAK FRITES ($24) - well sized portion, including a side of m…	0	Positive	["ca n't", 'dinner', 'small', 'cozy booth', 'shared', 'prosecco', '$ 12/glass', 'overall', 'wine list', 'steak frites', 'cooked', 'skate', 'butter lemon sauce', 'used', 'fresh french bread', 'served', 'good portion', 'french beans', 'entrees', 'entire menu', 'challenge', 'def', 'tartare', 'duck confit', 'prosecco glasses', 'amex']
1526	4	4	41625	I loved this little neighborhood French restaurant. Great food, wine and service. Really small and quaint. You feel like you are in France.	0	Positive	['little neighborhood', 'french restaurant', 'great food', 'really', 'france']
1527	4	4	41402	Love this place. My hubby and I had dinner here and the experience was great! Reminded me very much of an traditional Parisian restaurant with ambience and all. We didn't need a reservation, the manager (I believe he was the mgr) seated us right away. He was very friendly and accommodating. Our server was nice and attentive as well. The restaurant is small and quaint, just like a traditional Fren…	0	Positive	['love', 'reminded', 'parisian', "n't need", 'traditional french restaurant', 'paris', 'atmosphere', 'classic pictures', 'white walls', 'candles lit', "'s romantic", 'bordeaux', 'lighter side', 'steak frites', 'nyc', 'great ambiance', 'yum']
1528	4	4	40754	Went here for dinner with a friend. It's really tiny, but cutely decorated and seating is very tight, so you can hear your neighbors conversation. It was busy for a Tuesday night! Luckily we had reservations. We ordered mussels, duck confit, and skate. Everything was delicious, your basic French fare done well. The skate was especially good! The presentation of the plates was very lovely and thou…	0	Positive	['went', 'neighbors conversation', 'luckily', 'duck confit', 'basic french fare', 'french cafe']
1529	4	5	41670	OMG what can I say but the food was fantastic. Ã‚Â I am a French heritage American and love my basic cafe french cuisine. Ã‚Â Everything here was perfectly served well, clean surroundings and rather friendly french management. Looking forward to eating here again in November on my next trip. Ã‚Â Milles Mercis!	0	Positive	['omg', 'french heritage', 'basic cafe french', 'clean surroundings', 'friendly french management', 'looking', 'november', 'milles mercis']
1530	4	4	40983	Like your sitting in cafÃƒÂ© in Paris.	0	Neutral	['paris']
1531	4	4	41119	I will definitely go back in the future. Ordered the steak frites and my friend ordered the duck confit. This petite bistro produce quality food with considerable prices. Suitable for cozy date or group of four. Ã‚Â The restaurant is pretty petite so make a reservation to secure the spot. Quality french food with reasonable price.	0	Positive	['ordered', 'steak frites', 'duck confit', 'petite bistro', 'quality food', 'considerable prices', 'cozy date', 'pretty petite', 'quality', 'french food', 'reasonable price']
1532	4	2	40855	We decided to try this place a couple of weeks ago based on the yelp reviews. Needless to say we were pretty excited! I had the eggs benedict and my husband had the wild mushroom omlette. The dishes came out really quickly but it was definitely not what I was expecting. The food was poor quality but I guess that's why the food is so cheap. Furthermore the atmosphere was unpleasant, they really tr…	0	Positive	['yelp reviews', 'needless', 'eggs benedict', 'wild mushroom omlette', 'poor quality', 'furthermore', 'squeeze people', "'s conversations", 'ok', 'york', 'great brunch places', 'twice', 'slow eater', 'good quality breakfast/brunch food', "n't bother", 'great places', 'friedman', 'food options']
1533	4	4	41403	Solid brunch food at very good price for NYC. No wonder they got good review and business. The place is small and packed. Even though we came around 2pm, we still waited about 10 minutes before seated. But once sat down, the food is served pretty quick.	0	Positive	['brunch food', 'good price', 'nyc', 'good review']
1534	4	3	41529	If I was solely rating the food, I would definitely give this place five stars. Ã‚Â My three girlfriends and I planned for a last minute Sunday brunch. Ã‚Â I literally live 10 steps away, therefore I told my friends to call me when they get there so that I would walk down. Ã‚Â Even though the place was pretty empty with maybe 30% of their tables filled, they refused to seat them until our entire …	0	Positive	['pretty empty', 'entire party', 'attitude needs', 'oh', 'credit cards', 'different amounts', 'bad attitudes/hospitality', 'delicious food', 'will']
1535	4	4	40799	Very reminiscent of the bistros of Paris or your average French town. Charming owners and great, moderately priced menu of bistro favorites. Nothing special in terms of decor (in fact, don't look too closely), but that is part of its charm. Packed to the gills with local characters from the Murray Hill neighborhood. The food was wonderful and the wine list was simple and inexpensive (just like in…	0	Positive	['paris', 'french town', 'charming', 'bistro favorites', "n't look", 'packed', 'local characters', 'murray', 'hill neighborhood', 'wine list', 'france']
1536	4	5	40904	I took my husband here for his birthday and we really can't wait to come back! We don't go out to Murray Hill much as it wasn't really our scene, but I loved, loved everything about this restaurant. I love how authentic it is. I love the cozy, bistro feel, and how everything is so tight you can barely move from one table to another. Intimate, one would say. I love that everything feels authentic.…	0	Positive	["ca n't", 'murray hill', 'intimate', 'steak frites', 'own steak']
1537	4	4	40806	They gave great affordable french food. Their service isn't the friendliest but their food makes up for it. They weren't too happy when we did not order wine. Their desserts aren't too great. Come here for the food. I had the special of the day and it was great. My partner had the duck confit it was delicious. I'm definitely coming back.	0	Positive	['great affordable french food', 'order wine', 'duck confit']
1538	4	2	41089	Local bistro fare is good. But what the two french fellas and the food lack is any joie de vivre. Perfunctory service and no humour or smiles. So may other places where they at least seem glad you are there.	0	Positive	['local bistro fare', 'french fellas', 'food lack', 'perfunctory']
1539	4	4	40907	This place was close to a friend's apartment and we decided it looked like a promising last-minute brunch spot. We were seated quickly, the service was very good (were attentive without hovering, didn't try to push us out the door like they do at some places), and the food was excellent. I had the goat cheese and pesto frittata, which came served on a bed of fresh greens and french fries, and a m…	0	Positive	["friend 's apartment", 'promising last-minute brunch spot', 'goat cheese', 'pesto frittata', 'fresh greens', 'french fries', 'total cost', 'four-person group', 'quality food']
1540	4	5	41214	My boyfriend and I decided to have our date night here because we were in the mood for French food. Ã‚Â We were seated immediately (although we got there around 6 pm) and our waitress was attentive but not overbearing. Ã‚Â She also helped us decide what to order, which ended up being great choices--pan seared chicken with mashed potatoes and mushrooms, and parisienne mussels. Ã‚Â I'm usually wary…	0	Positive	['date night', 'french', 'great choices', 'parisienne mussels', 'great texture', 'wonderful broth', 'fresh vegetables', 'delicious too-it', "n't dry", 'mushrooms', "n't end", 'creme brulee', 'negative thing', 'otherwise', 'intimate setting']
1541	4	4	41481	Le Parisien is a cute authentic French restaurant in Murray Hill. We went as a party of 5 for Sunday brunch which originally I heard was pretty packed. However when we went, there wasn't a crowd but we needed to all be present before we could be seated. We did the prix fixe brunch with entree and 1 boozy drink for $15. I ordered the Ham and Gruyere Omlette. It was very good but not anything speci…	0	Positive	['parisien', 'cute authentic', 'french restaurant', 'murray hill', 'prix fixe brunch', 'boozy drink', 'ham', 'gruyere omlette', 'french fries', 'french fries', 'large parties']
1542	4	4	40673	We were the first at the door on a Sunday morning. Quaint little restaurant. Love the ambience! We had the poached egg with salmon gravlax and eggs benedict. Food came out quickly and was excellent! We stayed to sip our coffee and chat a bit but people kept clearing our table of everything on it and even attempted to take our unfinished coffee mugs. We hadn't been there long buy were asked to lea…	0	Positive	['quaint', 'love', 'salmon gravlax', 'eggs benedict', 'coffee mugs', 'york']
1543	4	2	40727	Eh. I probably went at the worst time possible: came here for Sunday brunch, waited like 40 minutes, was crammed into a table at a far corner. The place is not big to begin with, but it was so crowded and unbelievably loud, everyone at the table had to yell to hear each other. The food was pretty ordinary too. Not bad of a deal ($15 for a brunch dish) but the taste was was neither fantastic nor m…	0	Positive	['eh', 'brunch dish', 'overall experience']
1544	4	4	41751	Yes, I love this place. Ã‚Â The food is awesome. Ã‚Â Mussels are the best in the city. Ã‚Â Steak frites wonderful. Ã‚Â Salads are awesome. Ã‚Â Fair prices and great wine. Ã‚Â Excellent service every day from Anna. Ã‚Â But, Monday is a different story service from that young French fellow. Ã‚Â Talk about sounding arrogance, short and unfriendly.	0	Positive	['mussels', 'Ã¢ steak frites', 'salads', 'Ã¢ fair prices', 'great wine', 'excellent', 'anna', 'different story service', 'young french fellow', 'talk']
1545	4	3	41688	Neighborhood spot. Small, cozy, but not expensive. Ã‚Â Mussels (any of the soup variety) are always good w/ plenty of soup for you to soak up the juice w/ bread. Ã‚Â Good, crispy fries. Ã‚Â The soups, tartar, duck - all pretty decent. Friendly people.	0	Positive	['neighborhood', 'small', 'mussels', 'soup variety', 'good w/ plenty', 'juice w/ bread', 'crispy fries', 'friendly']
1546	4	4	40935	Had a pleasant dinner here recently. Not too crowded on a Friday night. Shared the grilled artichoke salad to start. I had the liver and onions. Everything was well prepared and the service was great. Would definitely eat here again if we are in the neighborhood.	0	Positive	['pleasant dinner', 'shared', 'artichoke salad']
1547	4	5	41140	My husband and I tried to make the lunch reservation but we couldn't get thru to make a reservation. Left frustrated after several attempts of calling, we gave up and we wrote to Le Parisien via Yelp to express our frustration with the relay call. Later, we got the call from the owner. He was apologetic and explained that he didn't realize that we are deaf customers. Ã‚Â He went far to get in tou…	0	Positive	['lunch reservation', 'left', 'parisien', 'yelp', 'deaf customers', 'relay service', 'lunch time', 'thank', 'parisien']
1548	4	4	40890	Went here for dinner. Having lived on French food for years I was craving something French. The steak frites hit the spot! Not like a dry steak but with sauce and caramelised onions. French fries were amazing. And my husband had the moules marinieres (mussels). Which were also really good. The waiter just did not understand/forgot to give the lid of the pot back after he emptied it of all the mus…	0	Positive	['went', 'french', 'steak frites', 'dry steak', 'french fries', 'moules marinieres', 'mussel shells', 'american standards', 'tad rude', 'french bistro', 'tarte', 'juice diet', 'good food', 'will']
1549	4	5	40727	Great food, really cute atmosphere. Intimate setting, perfect for a date without getting over-the-top fancy.	0	Positive	['great food', 'cute atmosphere', 'intimate', 'over-the-top fancy']
1550	4	5	41816	Great food, outstanding service. We came here the night of our engagement and have been back several times since and it never disappoints. Cute, tasty, affordable. Highly recommended!	0	Positive	['great food', 'outstanding service', 'cute', 'highly']
1551	4	4	41094	Arrived here a quarter to twelve on a Saturday. There were about 3 tables waiting ahead of us. I had poached eggs with salmon & my husband had the croque Monsieur - they were both fantastic and you can't beat the 14.95 brunch pre-fixe which includes a coffee, OJ, or a b-fast cocktail. Can't wait to come back!	0	Positive	['arrived', 'monsieur', "ca n't", 'brunch pre-fixe', 'oj', 'b-fast cocktail', 'ca']
1552	4	4	41528	Great little restaurant! Ã‚Â Was thrilled to have made a reservation as at 8pm the place was bustling and it is not very big. Ã‚Â As others have pointed out - it's cozy but not cramped - relaxed and jovial atmosphere. Ã‚Â The menu is typical bistro fare with a few special items. I had a the steak tartare which was very good, flavorful but not overkill, and a tarte tatin which was delish! Totally …	0	Positive	['great little restaurant', 'was', "'s cozy", 'jovial atmosphere', 'typical bistro fare', 'special items', 'steak tartare', 'tarte tatin', 'totally']
1553	4	4	41463	I had an enjoyable brunch here; it has a nice, cozy, casual French cafe feel. They have a fixed brunch menu that includes an entree + your choice of coffee, sangria, or mimosa. There's a wonderful selection to choose from and I ended up having the Salmon Benedict, while my friend ordered the Grilled Chicken Sandwich. We both had a sangria each. My Benedict came with a side of seasoned fries, and …	0	Positive	['enjoyable brunch', 'french cafe', 'brunch menu', 'entree +', 'wonderful selection', 'salmon benedict', 'grilled', 'sandwich', 'benedict', "friend 's sandwich", 'brunch date']
1554	4	5	41464	Food is awesome with big portions. We ordered mussels, and two main courses. Initially we also wanted to order two appetizers but the waiter has kindly reminded us not to. The mussels are very juicy, with smoked duck and tomato sauce, it's among one of the best I have ever tried! Prices very reasonable!	0	Positive	['big portions', 'main courses', 'tomato sauce', 'prices']
1555	4	5	40758	Cutest little french bistro in murray hill (of all the places!). We walked in on a busy Thursday night (after being quoted a 1.5 hour long wait at Cask next door) and were able to score a table immediately. I loved their wine carafes which were moderately priced and much less intimidating than ordering a whole bottle. Food was phenomenal. Literally everything we ordered was delicious to the last …	0	Positive	['cutest', 'french bistro', 'murray hill', 'long wait', 'cask', 'wine carafes', 'whole bottle', 'literally', 'holy moly..', 'snail shell', 'yum']
1556	4	2	40957	Had the duck liver pate and was disappointed. It was dry and just was not full of the taste that one would expect. Persons in my party complained about the steak being tough. Had the duck confit which was ok. Don't think the restaurant deserves the 4 star rating it has on Yelp	0	Negative	['duck liver pate', 'duck confit', 'yelp']
1557	4	4	40772	My go to brunch for my neighborhood. Having discovered this magical place after being told of a 2 hour wait at Penelope, Le Parisien seated my friend and I no problem, and even gave us free mimosa refills since it was near the end of brunch hours. They have all the typical standard brunch foods but no place nearby can beat their French fries, these thin sticks of potato is fried to perfection. I'…	0	Positive	['magical place', 'penelope', 'parisien', 'free mimosa refills', 'brunch hours', 'typical standard brunch foods', 'french fries', 'thin sticks', 'portobello mushroom pesto sandwich', 'brunch menu', 'salmon eggs', 'benedict', 'hmmmmm', "'d advise", "ca n't", 'dinner menu']
1558	4	4	41624	BRUNCH! Scrumptious, heavenly, all that is right in world with this new amazing spot I have just discovered! I have nothing but amazing things to say about this quaint gem! No reservations taken, but my brunch date and I walked in around 12:15 to find only 4 tables taken, but by the time we had gotten our drinks, and ordered, the place was packed. Things to Note As Pertaining to Ambiance: 1. Plac…	0	Positive	['brunch', 'scrumptious', 'new amazing spot', 'amazing things', 'quaint gem', 'brunch date', 'pertaining', 'ambiance', 'small party', 'sharp', 'intimate setting', 'busy rush', 'okay on to the food', 'free', 'brunch drink', 'sangria', 'even', 'boozy brunch ...', 'alas', 'classic eggs benedict', 'ham', 'hollandaise', 'brunch date', 'poached eggs', 'salmon gravlax', 'english muffins', 'hollandaise',…
1559	4	3	41875	Really cute and intimate spot. A friend and I had dinner early here (6pm) and were lucky to get the table by the front window so we weren't crammed in tight next to other tables. It got packed around 7or so and though the wait staff was friendly, I felt rushed. It's really small so the volume gets pretty loud and not really a place where you can sit for awhile to catch up with friends. We split t…	0	Positive	['really', 'intimate spot', 'front window', 'artichoke salad', 'cherry tomatoes', 'lemony vinaigrette', 'nice', 'cauliflower emulsion sauce', 'side salad', 'side salad', "friend 's skate", 'apple tart', 'ice cream', 'ok.']
1560	4	4	41731	food is pretty good. very hole in the wall place. my friend got the mussels and says it was amazing and he got double the amount of mussels he usually gets. so it was a lot of mussels. I got the chicken and it was delicious too though I was still hungry afterward. but I do eat a lot...	0	Positive	['wall place', 'hungry afterward', 'lot ...']
1561	4	5	41806	My girlfriend and I were saying overnight in the Murray Hill area and we were looking for a place to celebrate some good work news. Although I found it a bit strange that she wanted to eat French food in NYC (as she is French and lives in Paris), we stopped by this cozy dinner place. We had a wonderful meal of moules mariniÃƒÂ¨re, steak frites, and tarte tatin. Very intimate setting with great de…	0	Positive	['murray', 'hill area', 'good work news', 'french food', 'nyc', 'paris', 'cozy dinner place', 'wonderful meal', 'moules mariniÃ£Â¨re', 'steak frites', 'tarte tatin', 'intimate setting', 'great decor', 'paris', 'east 33rd', "ca n't"]
1562	4	2	40698	Went here for the second time and it wasn't as good as I remembered. Ordered the pasta, steak frites, mussel appetizer and two drinks. Overall just underwhelming. Total bill including tip came out to lil over 100$. Maybe people go because it's the only bistro in the area.	0	Positive	['went', 'ordered', 'steak frites', 'mussel appetizer', 'overall', 'total bill']
1563	4	5	41756	Ahhhh.... Paris... city of light... and love. Wonderful anniversary dinner with the hubby. We have made our marriage stronger by coming to places like Le Parisien. It's not fancy, or pretentious... but it's obvious that this is where people come to indulge in fine French cuisine and libation. We shared a 1/2 carafe of 2012 red from Cotes du Rhone. Dry and delish. The ambiance is very low key and …	0	Positive	['ahhhh', 'paris', '... city', 'light ...', 'wonderful', 'anniversary dinner', 'parisien', 'pretentious ...', 'cotes', 'rhone', 'dry', 'escargot', 'garlic ...', 'butter ...', 'crusty bread', 'main courses', 'duck confit', 'fries ...', 'fry ...', 'downright tasty', 'dessert ...', 'profiteroles', 'ice cream', 'floating', 'meringue', 'vanilla bean custard', 'profiteroles', 'floating', 'island ...', …
1564	4	4	40702	I haven't had much French food, but their escargot was deliciously garlicy with a strong pesto flavor and my duck confit was juicy and fall-off-the-bone good. Ã‚Â I basically had to restrain myself from gobbling everything down in a matter of minutes. Ã‚Â However, the price to portion ration was a bit high for me, but I didn't mind quite as much since the food was good. Ã‚Â As a side note, the se…	0	Positive	['french food', 'strong pesto flavor', 'duck confit', 'fall-off-the-bone good', 'portion ration', 'bit high', "n't mind", 'side note', 'bit spotty']
1565	4	3	41330	All I can say is that they must have offered decent food and service Ã‚Â - because one day later I couldn't remember what I ate or how the service was...	0	Positive	['decent food', 'service Ã¢']
1566	4	4	41211	I like this type of place. Small, traditional, great waiters, delicious food. Also centrally located.	0	Positive	['small', 'great waiters', 'delicious food']
1567	4	4	41687	Amazing all the way around!	0	Positive	['amazing']
1568	4	5	40942	Best meal I had in New York. We order multiple dished including the chicken and the mussels. Everything was perfect. The best creme brulee that I have every had. The service was very good and it was packed. I highly recommend that if you are in New York, you must dine here.	0	Positive	['york', 'creme brulee', 'york']
1569	4	4	41206	This is an adorable little restaurant in the Murray Hill area. We came here for brunch and really liked the ambiance and food. The interior is adorable, but it does get very cozy. There's not a lot of room here, and it would be difficult to get more than a group of 4 in here. It gets reasonably busy on the weekend, but not so much that there's a long line. The interior is decorated with vintage F…	0	Positive	['adorable little restaurant', 'murray', 'hill area', 'long line', 'french posters', 'nice vibe', 'nice days', 'nice brunch menu', 'oj', 'additional glasses', 'eggs benedict', 'salmon benedict', 'cozy restaurant', 'nice vibe']
1570	4	4	40865	This is a great neighborhood staple. I've been coming here for a long time and everytime it's good. It dos get very crowded so I do recommend making a reservation.	0	Positive	['great neighborhood staple', 'long time']
1571	4	5	40759	Went there for brunch ! Salmon eggs Benedict is yummi ! It is a great quality and quantity for the price. They had good sangria and coffee ! Service is good and the place has an old European retro look ! The only thing I didn't like was the fact that they don't serve dessert on brunch.	0	Positive	['went', 'salmon', 'benedict', 'great quality', 'good sangria', 'old european retro look']
1572	4	5	41529	Went for dinner on Saturday night. The place is small and wasn't full,so I thought I might have made a mistake. The place looks like a Parisien bistro in Paris. We were promptly greeted and seated. The hostess/waitress/owner? was cheerful and knowledgeable and made us feel at home. We picked a wine which was a delicious rose. For my appetizer I had the potato roasted garlic soup which was delish.…	0	Positive	['went', 'parisien', 'paris', 'garlic soup', 'excellent wine reduction', 'simple delicious food', 'reasonably', 'friendly', 'hospitable staff', 'dessert someplace']
1573	4	4	41735	Excellent steak & frites!!! Very small place, about 6 tables in all and the food was delish!!! :) Will come again	0	Positive	['excellent', 'small place', 'will']
1574	4	4	40828	Its really hard to find a good place to eat around the midtown/murray hill, so this to me is a great find. Its a cute, humble lil' bistro, so groups of more than 4 will find it difficult to find seating, however they do take reservations. Ã‚Â I had the french onion soup, and grilled chicken sandwich, while my friend had the croque monsieur (pretty big portion). The grilled sandwich was ok, but i …	0	Positive	['good place', 'midtown/murray hill', 'humble lil', 'french onion soup', 'chicken sandwich', 'croque monsieur', 'pretty big portion', 'negative thing i']
1575	4	1	41146	I was looking for a spot on short notice and was happy to find an open reservation at Le Parisien. I showed up on time a short while later and was told it would be a 30 minute wait with no apology or explanation. My guess is this was a failure to coordinate Open Table with conditions at the restaurant, but sorry, that's not my problem. If you can't properly hold a reservation, you shouldn't waste…	0	Negative	['short notice', 'open reservation', 'parisien', "ca n't", "n't waste"]
1576	4	4	40882	Le Parisien is one of my favorite spots in the neighborhood for brunch. It's only $14.95 for your choice of a brunch entree along with a beverage (mimosa, sangria, coffee, or oj). The fluffy french toast is my go to. It's topped with apple compote and bananas with warm vanilla maple syrup on the side. I'm also a fan of the scrambled eggs with cured salmon and chopped scallions. It comes with a sm…	0	Positive	['parisien', 'favorite spots', 'only $', 'brunch entree', 'fluffy french', 'apple compote', 'warm vanilla maple syrup', 'small salad']
1577	4	5	41239	loved everything ... Duck is perfect. If I have to say something, I wish they have more dessert options	0	Positive	['duck', 'dessert options']
1578	4	4	41337	This place is tiny and the food is delicious. I had the thai mussels which were very good, several people in my group had other varieties of mussels and seemed to enjoy them. The mussels come with fries which I thought were too salty. The service was very good. My group really appreciated the free cocktails they let us sip outside since we had to wait a while because there was some mix up with ou…	0	Positive	['thai mussels', 'free cocktails']
1579	4	5	40675	Thank you, Yelp, for helping me find this place! Ã‚Â Everything was delicious, the place was tiny & charming, & service good. Ã‚Â Who could ask for anything more?	0	Positive	['thank', 'yelp', 'service good', 'who']
1580	4	4	41657	This is a quaint little place in the Murray Hill-ish area. It was a nice surprise, with Parisian decor and little Eiffel Towers decorating the space. The quite strange thing, was that my friend and I were about the youngest people there...strange indeed. Let's move on to the food... escargot - deliciously pesto and buttery, and large! worth it, not over cooked in the least mussels espagnole - (wi…	0	Positive	['murray hill-ish', 'nice surprise', 'parisian', 'eiffel towers', 'strange thing', 'food ... escargot', 'mussels espagnole', 'tomato confit', 'delicious mussel pot', 'right amount', 'frites steak tartare', 'portion size', 'great ...', 'frites creme brulee', 'sugar layer', 'great use', 'vanilla bean', 'tldr', 'great french restaurant', 'decent prices', 'good food']
1581	4	4	40864	Best casual French restaurant in the city that I've had. Good for brunch, staff is relatively friendly, and the steak is done quite well. Does have that Parisian air and yet doesn't overdo it.	0	Positive	['french restaurant', 'does', 'parisian', "n't overdo"]
1582	4	5	41437	I totally agree with all the other yelpers, indeed this one is a great find!! Every year around this time, my wife and I have this craving for typical french bistro food from our honeymoon. We have been looking for a whole in the wall, straight to the point, no frill french bistro food. Food was excellent!! It was as good as the one that we had during our honeymoon. So here's what we order: Escar…	0	Positive	['typical french bistro food', 'frill french bistro food', 'escargot-on', 'french bread', 'garlicky deliciousness ... hahahahh', "sorry ... i 'm", 'appreciates food', 'beef', 'seasoned', 'steak frites-was', 'guess what..i recieve', 'rare steak ...', 'duck', 'super crispy', 'bit salty', 'thats okay', 'overall', 'nyc', 'small ...', 'bon']
1583	4	1	41780	I ordered french onion soup, escargots and pork special of the day. The french onion soup was lukewarm.. Soups are supposed to be burning hot, especially french onion soup that is covered with cheese. Because it was lukewarm, the cheese was nowhere near gooey. Escargots were too small... They were legit the size of my pinky nail. The pork special was too thin and too sour because they put too muc…	0	Positive	['french onion soup', 'french onion soup', 'soups', 'french onion soup', 'escargots', 'small ...', 'pinky nail', 'capers ...', 'nice french restaurant']
1584	4	4	41676	Small and cozy Parisian restaurant - a bit too small for my taste but it was still manageable. The mussels are a definitely must-try! They tasted fresh and flavorful with the garlic and white wine. It's a simple and classic touch that compliments well with the fishy-ness of the mussels. We also got the steak frites and an extra star for extra fries. Tip: make reservations! The place is small and …	0	Negative	['small', 'parisian', 'white wine', 'classic touch', 'steak frites', 'extra star', 'extra fries', 'tip']
1585	4	4	40996	You definitely have to make a reservation at this place. A group of four showed up right in front of us and were turned away, luckily we had thought ahead. I like that you can make the reservations over Yelp. The restaurant itself is pretty tiny, yet they manage to fit a lot of people in it. This leads to some of the areas being very crowded, we originally were seated elbow to elbow with another …	0	Positive	['yelp', 'spacious corner table', 'room look', 'different paint', 'huge mirrors', 'nice restaraunt', 'nice steak', 'overall', 'dessert menu', 'cream puff', 'warm fudge', 'small space', 'mediocre steak']
1586	4	4	41223	You cannot get a better deal that Ã‚Â brunch during weekends. $14.95 for great eggs Benedict with mimosa/sangria or coffee. Ã‚Â The service was really good. The place is small and a little bit outdated but good food!	0	Positive	['Ã¢ brunch', 'great eggs', 'benedict', 'good food']
1587	4	5	41605	I am, admittedly, a total Francophile and am always looking for a French restaurant that makes me feel like I am in Paris - Le Parisien is it! Ã‚Â We love this charming little restaurant, have been coming for the last few years and never disappoints. Ã‚Â The food is always perfect - simple and authentic french, the service is great, wonderful casual ambiance and so reasonably priced for both the …	0	Positive	['francophile', 'french restaurant', 'paris', 'parisien', 'charming little restaurant', 'authentic french', 'wonderful casual ambiance', 'brunch']
1588	4	1	41296	My family and I stopped by at this place for dinner around 7pm. Ã‚Â Upon entering there were a few tables open so we though we get a seat quickly. Ã‚Â The owner asked how many and I said three. Ã‚Â He then asked if I had a reservation, I said no then he proceeded to say that they were booked until 9. Ã‚Â So immediately I go to opentable.com and I was able to find a table for 7:30pm and made reser…	0	Positive	['upon', 'open tables']
1589	4	3	41856	Had dinner with my girlfriend there couple weeks ago. We ordered the escargot for appetizer, calf liver and mussel for entree. Let me tell you why they deserve the 3 star. The food there was just so blend! The taste is just close to average. Calf liver was disappointing because the sauce completely covered up the natural taste of the calf. Mussel is ok, not impressive at all. With the food qualit…	0	Positive	['couple weeks', 'calf liver', 'calf', 'natural taste', 'mussel', 'food quality', 'high $', 'price range', 'american-want-to-be-french']
1590	4	5	41399	Food and service were both excellent. Couldn't resist trying all the classics: steak frites, french onion soup, and the creme brulee. The steak frites and the creme brulee were exceptional. Reservations highly recommended, as the place is tiny and very busy.	0	Positive	['steak frites', 'french onion soup', 'creme brulee', 'steak frites', 'creme brulee', 'reservations']
1591	4	5	41510	Wow, great find, yelpers! I had a hankering for good french food at a decent price and this is what you returned for me! i made a reservation for 6:30pm on a Friday evening and when I got there, there weren't many tables taken. After my friend and I were seated, and handed our menus to review, I looked up at the place was packed! We started with the escargot, which was just as good as I remember …	0	Positive	['wow', 'good french food', 'decent price', 'paris', 'garlic herb butter', 'duck confit', 'bistro steak frites', 'duck confit', 'super tender', 'french fries', 'perfect way', 'great experience', 'great meal']
1592	4	4	40629	Great neighborhood find. Had a delicious lunch. Will try dinner next time.	0	Positive	['great neighborhood', 'delicious lunch', 'will']
1593	4	4	40825	If you face away from the street, you can pretend you're in Paris at this tiny brasserie/cafe. Ã‚Â A very authentic feel and delicious food.	0	Positive	['paris', 'tiny brasserie/cafe', 'delicious food']
1594	4	4	41010	Great place to go for casual weekend brunch. Food is good and they have an excellent brunch deal consisting of a main dish + a glass of mimosa/sangria/coffee for under $15. It's a quaint little joint, not too shabby and not too fancy. Perfect place to go if you want to brunch in a more comfortable atmosphere and don't want to over spend.	0	Positive	['great place', 'casual weekend brunch', 'excellent brunch', 'main dish +', 'perfect', 'comfortable atmosphere']
1595	4	3	41552	Stopped by for brunch on our way to the Little Prince exhibit at the Morgan Library. Prayed the wait wouldn't be ridiculously long. Got there and we were seated in two minutes. Saw the window table open up and the restaurant was awesome enough to let us sit there. Service was great. Food was your standard brunch fare but price was good - $14.95 including a mimosa, sangria or coffee. I'm never in …	0	Positive	['stopped', 'little prince exhibit', 'morgan', 'prayed', 'got', 'saw', 'window table', 'standard brunch fare', "wo n't", 'gazillion hours']
1596	4	4	40978	Definitely worth going on a date night. Ã‚Â The couple who seem to be the owners are French. Ã‚Â That won me over because, after all, it's a French restaurant. Ã‚Â It's tiny, not fancy, and the food was just good not great. But I enjoyed the service and quaintness of it so much that I have to give it four stars. Ã‚Â And, like I said, most girls wouldn't mind being taken there. Ã‚Â I would go back.	0	Positive	['definitely', 'date night', 'french restaurant', "n't mind"]
1597	4	4	41816	During a recent weekend in New York City, I wanted to find a nearby, authentic French restaurant for a romantic dinner. Ã‚Â Out came my yelp app, and 5 minutes later we were on our way to Le Parisien. Ã‚Â As someone who has spent time in the City of Lights, I can vouch for this place's authenticity. Ã‚Â I felt like I walked through the threshold into a quaint place in Paris for a delicious evenin…	0	Positive	['recent weekend', 'york', 'french restaurant', 'romantic dinner', 'yelp app', 'parisien', 'lights', "place 's authenticity", 'quaint place', 'paris', 'delicious evening meal', 'matchy-matchy vibe', 'american restaurant', "place 's", 'eclectic decor', 'parisien', 'pork tenderloin', 'restaurants over-cook pork', 'white meat', 'pork tenderloin', 'parisien', 'portion size', 'huge portion eaters', 'w…
1598	4	3	41538	Le Parisien is a good standby restaurant. Ã‚Â Not bad, but not too good. Ã‚Â Very good service, and a small, but good wine list. I had a pear & endive salad and a roast chicken entry. Ã‚Â Both were real and good, but again, not great. Ã‚Â The main flavor I tasted on the chicken was chlorine, which is surprising because of the excellent quality of New York City water. Ã‚Â The restaurant is small a…	0	Positive	['parisien', 'good standby restaurant', 'good service', 'good wine list', 'endive salad', 'roast chicken entry', 'main flavor', 'excellent quality', 'york', 'city water', 'french', 'us standards', 'italian', 'cloth serviettes', 'towels ...', 'kind', "wo n't return", 'excellent restaurants', 'ny']
1599	4	4	40818	Not the most beautiful restaurant you'll find but definitely a neighborhood gem. Le Parisien resembles a cute rustic French cafe. And for brunch, only $14.95?! Oh yes, please!!! Your brunch entree comes with either a glass of mimosa, sangria or a cup of joe. And them fries though... Crisped perfectly. Ahhhh, heaven! Worth the exploration if you're in Midtown East!	0	Positive	['beautiful restaurant', 'neighborhood gem', 'parisien', 'cute rustic', 'french cafe', 'oh', 'your', 'brunch entree', 'crisped', 'ahhhh', 'worth', 'midtown']
1600	4	4	41613	The food was very good. I had the Thai mussels with fries and my husband had the steak and frites. Both were very good! We also shared the filet mignon carpaccio and I would DEFINITELY get that again! The actual restaurant was very small and very crammed but it didn't really matter once you got situated into your seat. The service wasn't really that friendly but I would go back for the food!	0	Positive	['thai', 'filet mignon carpaccio', 'definitely', 'actual restaurant']
1601	4	5	41303	What a wonderful experience! Made a reservation for 8.30 on Thursday night, we walked into a packed restaurant but they had a table open for us. The place is very small(most likely an old apartment) nothing fancy, but don't let that fool you. The food coming out of that kitchen is fantastic! We tried, filet mignon appetizer which comes with a little arugula salad, it was great. My fiance got stea…	0	Positive	['wonderful experience', 'made', 'old apartment', 'filet mignon appetizer', 'arugula salad', 'duck confit', 'decadent creme brulee']
1602	4	4	41191	Cozy French restaurant - make a reservation and you'll get seated almost straight away. We got escargot, duck confit, and mussels. Good portions, didn't taste Americanized. Waiters/waitresses were attentive. Just that it could get a little cramped in there because the place is so small.	0	Positive	['cozy', 'french restaurant', 'duck confit', 'good portions', "n't taste", 'americanized', 'waiters/waitresses']
1603	4	4	41803	Attentive owners ensured our glasses were never low and our bellies were perfectly full. Ã‚Â Just lovely. Ã‚Â Cozy environment, beautiful dishes (try the filet mignon carpaccio) and great crowd. Ã‚Â Will be back! Ã‚Â :)	0	Positive	['attentive', 'cozy', 'filet mignon carpaccio', 'great crowd', 'will']
1604	4	5	40950	We had a great diner, nice wine, amazing duck breast, and mussels Parisienne. Cute little cozy place, got full by 7 pm. Would recommend.	0	Positive	['great diner', 'nice wine', 'amazing duck breast', 'parisienne', 'cute', 'cozy place']
1605	4	5	40759	A little on the pricey side, but the food at Le Parisien makes it worth it. I ordered the pan-seared half chicken and it was one of the most delicious decisions I've made recently. The portions were decently sized, especially compared to like restaurants. The ambiance was lovely and the restaurant was neither too loud nor too dark. Overall, great experience and even better food.	0	Positive	['pricey side', 'parisien', 'delicious decisions', 'overall', 'great experience']
1606	4	3	41608	Very cute spot and good for a date. It is extremely small which makes it a date move. The food was pretty good. Definitely will go back eventually.	0	Positive	['cute spot', 'definitely']
1607	4	4	40812	Comfy & cozy, despite the tight quarters and crowd. Went for NYE 2014 prix fixe dinner. Food was better than expected.	0	Positive	['comfy', 'tight quarters', 'went', 'nye', 'prix fixe dinner']
1608	4	4	41005	The food was fantastic! The service was great and friendly bit with a rush. The place is realy small so it is a bit noisy when it's crowded.	0	Positive	['friendly bit', 'bit noisy']
1609	4	3	41856	TL;DR: Skip brunch and come for dinner instead. Went for brunch at the behest of my girlfriend, but we came out slightly disappointed. Not that anything was wrong, but it was just really basic standard brunch fare with barely any French items (we got the Croque Monsieur and Egg White Omelette). Really wanted to like this place since its not too far from my apartment, but it was just nothing speci…	0	Positive	['tl', 'dr', 'skip', 'went', 'basic standard brunch fare', 'french items', 'croque monsieur', 'egg', 'omelette', 'really', 'brunch entree', 'complimentary coffee', '/ mimosa /', 'oj', '/ sangria', 'paris']
1610	4	3	41882	Came here for my dad's birthday yesterday and left a little underwhelmed. We came here at 12 pm on a Tuesday and the owner didn't want us putting our bags on any other chairs. I mean there's no one in the restaurant. Is that necessary? We asked for bread and he would take it out of a big bag with his bare hands - some gloves would have been nice. To start, I had the broccoli soup which was a seas…	0	Positive	['came', "dad 's birthday", 'big bag', 'bare hands', 'broccoli soup', 'truffle oil', 'wild mushrooms', 'aside', 'truffle flavor', "brother 's", 'beet salad', 'butter lemon sauce', 'steak frites', 'france', 'portobello sandwich', 'overall']
1611	4	3	40634	Finally made it here for dinner and I left disappointed. It's one thing to be in a cramped loud place for brunch, but it's a whole other story for dinner. My boyfriend and I were thisclose to the two tables next to us and it was loud and just kind of disjointed. I didn't feel relaxed during the meal and didn't feel like we really had the chance to catch up. Bummer! The food itself was just okay. …	0	Positive	['loud place', 'just kind', 'bummer', 'artichoke salad', 'steak tartar', 'french onion soup', 'artichoke salad', 'weird taste', "ca n't place", 'steak tartar', 'steak tartar', "wo n't", 'possibly', 'sounds']
1612	4	4	41864	Lovely French restaurant with a great brunch menu. We came and were delighted to see the prefix menu~ brunch for $14.95. Done! We wanted to try something new. Live on 55th and Lex, hopped on and off the subway and wandered until we found this little treasure. He got poached eggs with salmon. I got the eggs Florentine. Both came with a spinach salad and french (ha) fries. The fries were perfect. T…	0	Positive	['lovely french restaurant', 'great brunch menu', 'prefix menu~ brunch', 'done', 'live', 'lex', 'little treasure', 'florentine', 'spinach salad', 'entire place', 'friendly', 'clean']
1613	4	4	41025	One of the best kinds of neighborhood bistros you can find no matter where you live. One only wishes that their own version Le Parisien is across the street from them as a go-to dining spot that epitomizes reliability in quality and enjoyment. Not to mention extremely affordable. Excellent brunch options for under $15 is unheard of in Manhattan, and while other brunch destinations may leave you d…	0	Positive	['neighborhood bistros', 'own version', 'parisien', 'epitomizes reliability', 'excellent', 'brunch options', 'manhattan', 'brunch destinations', 'excellent', 'croque monsieur', 'dinner', 'standard bistro fare', 'french onion soup', 'steak frites', 'duck confit', 'quiet winners', 'feel', 'extensive wine list']
1614	4	4	41612	You know a place has solid food when there's a French 90-pound little old (money) granny in a massive fur coat gobbling down monkfish like it's the last meal she'll enjoy on this earth. Cozy French ambiance, excellent service, and if the food is good enough for French granny, you're damn well going to enjoy it.	0	Positive	['solid food', 'french 90-pound', 'massive fur coat', 'cozy', 'french ambiance', 'excellent service', 'french', "'re damn"]
1615	4	3	41658	Overall, we had a nice time. The restaurant is very small, but the food and service were good. The beet salad is excellent. And the waitress was able to suggest a delicious bottle of wine. The steak tartare is decent.	0	Positive	['overall', 'nice time', 'beet salad', 'delicious bottle', 'steak tartare']
1616	4	4	40758	Great poached eggs w salmon; nice ambiance; small but with lots of character. space is really cramped but that's not a big deal in manhattan.	0	Positive	['eggs w salmon', 'nice ambiance']
1617	4	4	41431	Great food great ambiance. We couldn't get a table the first time because it's always packed. Make sure you make reservation ahead of time!	0	Positive	['great food', 'great ambiance']
1618	4	4	40985	Great for brunch. Nice environment. Somewhat small for a big group of people. But the food is great. No complaint there.	0	Positive	['nice', 'somewhat', 'big group']
1619	4	4	40880	Went with my college age daughter to celebrate her studying next year in Paris. Good move. This is a neighborhood bistro that serves very good authentic French cuisine. Attentive and friendly staff. It's pretty cozy so don't expect privacy. On the other hand our fellow patrons were friendly and contributed to the ambiance. Not pretentious at all. We'll be back.	0	Positive	['went', 'college age daughter', 'paris', 'neighborhood bistro', 'good authentic', 'attentive', 'friendly staff', 'pretty cozy', 'fellow patrons']
1620	4	3	40745	Great little french bistro in Murray hill. Prices are very reasonable and food was pretty good. I ordered the moules for my family to share and for entrees we had the steak and Duck confit. Both were pretty good but not exceptional. The duck was a little dry and the steak was not very tender but both entrees were dressed well with a delicious sauce to compliment the meats. It was a good meal and …	0	Positive	['great little french bistro', 'murray', 'prices', 'duck', 'delicious sauce', 'good meal', 'cute french bistro vibe', 'casual date', 'special occasion']
1621	4	4	41755	Cute and petite. I took my girlfriend there for Valentines Day and the place was decorated with red balloons and lit by candles creating a cozy and intimate atmosphere. They had a special 3-course prie fix Valentines Day menu for $49 per person from which I ordered a celery soup, a pan seared salmon, and a banana tart. Everything was wonderful, nothing too fancy, simply well cooked french food. W…	0	Positive	['cute', 'valentines', 'red balloons', 'intimate atmosphere', 'special 3-course prie fix', 'valentines', 'day menu', 'celery soup', 'banana tart', 'french food', 'vintage french posters', 'valentine', "'s day", 'paris', 'finished', 'finished', 'finished', 'valentine', "'s day", 'please']
1622	4	4	40957	Le Parisien Bistrot is a cute little French bistro, it reminds me of the Paris cafes in France. The restaurant is very small, but filled with a lot character. We went there for brunch with a group of people. The wait wasn't too long, and service is good. The eggs benefit was really yummy, the egg was perfectly cooked; the egg was running down the Ã‚Â ham and bread...so good. The french toast with…	0	Positive	['parisien bistrot', 'french bistro', 'paris', 'france', 'lot character', 'eggs benefit', 'Ã¢ ham', 'bread ...', 'vanilla maple syrup', 'loads', 'vanilla syrup', 'mushroom', 'steak sandwich']
1623	4	3	40725	Food was delicious here. Escargot is a must! Duck dish was pretty tasty too.	0	Positive	['escargot', 'duck', 'pretty tasty']
1624	4	5	40656	Delicious! We had the mussels (marniere and Parisienne). Much to my surprise they were very sizable portions. It might be easy to miss the door but once you're inside you'll feel warm and cozy.	0	Positive	['delicious', 'parisienne', 'sizable portions']
1625	4	5	41367	Food was great - ordered mussels, steak frites, and a bottle of wine for dinner. Ambiance - small restaurant, could get a bit loud. Service - very good.	0	Positive	['steak frites', 'ambiance', 'small restaurant']
1626	4	5	41759	Le Parisien is the perfect little French cafe in a very American city. The place was small and quaint, with dim romantic lighting. The staff was very authentic in their French-ness, without exhibiting any of that infamous French attitude. I wouldn't even be able to blame them if they did, since my friend hadn't shown up till 20 minutes past our reservation. Now, when I say small, I mean you have …	0	Positive	['parisien', 'perfect little french cafe', 'american city', 'dim romantic', 'french-ness', 'french attitude', 'minutes past', 'regardless', 'good idea', 'delicious', 'onion soup', 'choice ...', 'crusty brad', 'overall', 'will']
1627	4	4	41419	I went last night for dinner. It's a tiny place with lots of character. You have to be okay with tight spaces - there's only a few inches between tables. The Skate fish was fantastic! I will be back again	0	Positive	['tiny place', 'tight spaces', 'skate']
1628	4	5	41714	Stopped by for a quick bite to eat. I was in a rush, and only had a few minutes. Granted, the restaurant wasn't busy, but the food arrived super quick. The Sancerre as well as the food was excellent. Great portions; highly recommended.	0	Positive	['stopped', 'granted', 'sancerre', 'great portions']
1629	4	4	41445	The deal for the brunch menu was awesome. $15 for drink (mimosa, coffee, etc) and a brunch item which comes with fries and salad. I thought the egg white omlette with salmon was pretty good. I am not really into fish, but the omlet itself was well cooked and seasoned. I loved loved the fries. Salad was pretty good too. The waiter seemed to be in a rush to get us out though. So I wish there was mo…	0	Positive	['brunch menu', 'brunch item', 'white omlette', 'salad']
1630	4	5	41092	It's fantastic, nice atmosphere, Ã‚Â great service. Ã‚Â The mussels and the stack are amazing. Ã‚Â Tried the brunch , it's great and they have a good deal for it	0	Positive	['nice atmosphere', 'great service', 'tried']
1631	4	4	41757	Excellent. I can add little to positive comments that have been said before. The nonchalant server approach is pure French and should not be misread. This is Bistro style French cuisine at its best. With about 12 tables reservations are recommended. Try mussels, duck confit, salads and Floating Island desert. Short wine list but well selected...try the Sancerre!	0	Positive	['excellent', 'positive comments', 'nonchalant server approach', 'bistro', 'tables reservations', 'try', 'duck confit', 'floating', 'island desert', 'short', 'wine list', 'sancerre']
1632	4	4	40767	What a charming French bistro! We stopped by on a week day after failing to get a table at another place nearby. We saw a full house and a decent wall of wine so we had to step in. This bistro has a charming quality to it: quaint enough to let it be a date night without giving the impression of "trying too hard." The seating area is pretty small, especially since one end of it is wall-to-wall gla…	0	Positive	['charming french bistro', 'week day', 'full house', 'decent wall', 'charming quality', 'date night', 'wall-to-wall glass', 'rub elbows', 'bistrot', 'frites', 'wine thyme sauce', 'shallots', 'duck confit', 'crispy potatoes', 'mushrooms', 'frisee salad', 'duck confit', 'overall', 'pleasant surprise']
1633	4	4	40759	Great place but small. Really good food. Had the duck, beet salad, mussels. Came here after the movies at kips bay. Pleasantly surprised.	0	Positive	['great place', 'really', 'good food', 'beet salad', 'came', 'kips bay', 'pleasantly']
1634	4	3	41038	The food and wine was all delicious. We enjoyed two fantastic entrees and a delicious profiterole dessert. My only criticism is that the waitstaff was a bit off-handed. My friend and I are in our early twenties, and it seemed like we were being talked down to for asking about wine recommendations, favorite desserts, etc. All in all, we would definitely go back, but not for the service.	0	Positive	['fantastic entrees', 'delicious profiterole dessert', 'early twenties', 'wine recommendations', 'favorite desserts']
1635	4	4	41827	Truly good french food, for a (for new york) reasonable price. This is the kind of place you bring that special family member you want to impress :D	0	Positive	['truly', 'good french food', 'new york', 'reasonable price', 'special family member']
1636	4	5	40988	We picked this restaurant based on yelp. The escargot was as good as what I remember from France. My husband ordered the mussels and received a HUGE pot of mussels. They were really good and he filled up because there were so many. He said he never expected to fill up from an order of mussels - it happened. I ordered one of the nights specials - coq au vin - it was superb! Also a big plate; I ate…	0	Positive	['france', 'huge', 'nights specials', 'coq au vin', 'big plate', 'quaint restaurant']
1637	4	3	41140	Great neighborhood French bistro, with friendly service and a cozy atmosphere. Ã‚Â We shared the endive appetizer (loved that they cut up the pieces very well), the duck confit and the mussels (can't recall the name, but first item on the mussel menu). Ã‚Â The duck was a bit overdone ... I like it when the confit is a bit tough to chew, but it was very flavorful. Ã‚Â The mussels were very fresh, …	0	Positive	['great neighborhood', 'french bistro', 'friendly service', 'cozy atmosphere', 'endive appetizer', 'duck confit', "ca n't recall", 'mussel menu', 'bit overdone ...', 'overall', 'yummy food', 'nice pleasant']
1638	4	5	40889	We had our xmas eve dinner there. It's such a cozy place to hang out with friends and family. Nice food and affordable. Recommend.	0	Positive	['xmas eve dinner', 'cozy place', 'nice', 'recommend']
1639	4	4	41509	I loved this place. Great food, nice ambience. The owner seemed to have much pride in the quality of the food they provide. Recommend!	0	Positive	['great food', 'nice ambience', 'recommend']
1640	4	5	41543	Le Parisien is not posh, but is absolutely perfect for what it is - really great food and very friendly and helpful service. The menu contains basic French bistro food, and it was all very well executed. Fantastic duck confit. While in NYC we went to fancier places, but none less memorable. We'll be back.	0	Positive	['parisien', 'great food', 'helpful service', 'menu contains', 'basic french bistro food', 'fantastic', 'duck confit', 'nyc', 'fancier places']
1641	4	4	41099	Went to Le Parisien for a date last night and this restaurant definitely lived up to it's reviews! Ã‚Â Everything we had was delicious. Ã‚Â The escargot was very tasty and presented very well. Ã‚Â The pot of muscles (garlic and white wine) was an extremely generous portion. Ã‚Â The steak frites were cooked exactly as we had ordered and had a delicious, rich red wine flavor. Ã‚Â Even the wine was …	0	Positive	['went', 'parisien', "'s reviews", 'white wine', 'generous portion', 'steak frites', 'rich red wine flavor', 'cozy atmosphere', 'huge gust', 'will', 'parisien']
1642	4	4	41672	Pretty good food. Ã‚Â Great ambience. Ã‚Â Good service. Ã‚Â This is a fun neighborhood spot that is definitely worth a try.	0	Positive	['pretty good food', 'great ambience', 'good service', 'fun neighborhood spot']
1643	4	3	41473	i would say its more like 3 1/2 stars. Ã‚Â really difficult to rate this place. I'm mixed with rating the service. Ã‚Â the waitress was really confident with the food and will not recommend anything because everything is " great". Ã‚Â oooookay. Ã‚Â she was really nice about me sitting there for a while waiting for my friend who was late without making a big deal out of it. thank goodness it was a…	0	Positive	['Ã¢ oooookay', 'horrible snowy night', 'tiny space', 'duck confit.. Ã¢', 'tasty escargot', 'Ã¢ i', 'duck confit', 'tiny portion', 'small piece', 'great flavor', "n't mind", 'great authentic flavor', 'steak tartar', 'paris', "wo n't"]
1644	4	2	41507	I came for lunch and had an omelette and coffee. Ã‚Â Neither was good. Ã‚Â This place came highly recommended from a good friend whose taste I trust so I would give it a second chance if the opportunity presented itself, but I'm in no rush to make a second reservation.	0	Positive	['good friend']
1645	4	2	41559	it was my birthday and they did absolutely nothing to make me feel happy/special. they were fine aside from running about 20 minutes late. they're french in attitude and service. the food is good. this place is certainly overrated.	0	Positive	["'re french"]
1646	4	4	41495	So much better than expected. And, dare I say it: so much better than current state of bistro fare in Paris itself. The bread was terrific -crusty on the outside, moist and chewy on the inside. We both had the soup of the day which was an excellent squash soup laced with dark green streaks of extra virgin olive oil. I thought it was a little under-salted but my husband didn't (and we are usually …	0	Positive	['current state', 'bistro fare', 'paris', 'terrific -crusty', 'excellent squash soup', 'dark green streaks', 'extra virgin olive oil', 'opposite sides', 'white wine', 'fresh mussels', 'terrific broth', 'good skinny fries', 'paris', 'string beans', 'potato puree', 'different times', 'paris', 'years past', 'prix fixe brunch', 'advt price']
1647	4	5	40837	I made a reservation for 2 at 5:45pm on a Wednesday night, since all the previous reviews recommended I do so. We were the first in the restaurant but it quickly filled up moments later. It's a small place, but not stuffy and quite affordable. There aren't many restaurants I would return to, but this is one of them. There is a giant chalkboard at the front with a selection of wines by the glass, …	0	Positive	['previous reviews', 'small place', 'giant chalkboard', 'steak tartare', 'raw egg', 'french fries', 'duck', 'out-of-this-world potato slices', 'bebe', 'duck ...', 'potato ...']
1648	4	5	40783	good food, quiet, small, neighborhood french	0	Positive	['good food', 'neighborhood french']
1649	4	4	41732	I had an excellent dinner here with an out of town friend. Delicious food, large portions, reasonable price, relaxed & cordial service, charming decor. I'll definitely return!	0	Positive	['excellent dinner', 'town friend', 'delicious', 'large portions', 'reasonable price', 'cordial service', 'charming decor']
1650	4	5	41413	Charming, reasonably priced with great service.	0	Positive	['charming', 'great service']
1651	4	5	41152	Definitely surpassed my expectations! The food was good the service was great. My favorite us the soup and calves liver. Of course, calves liver is an acquired taste. The waiter came back occasionally to make sure everything is alright and made sure they didn't disrupt our conversation. The place is really small though, so make sure you make a reservation!	0	Positive	['definitely', 'calves liver', 'calves liver', "n't disrupt"]
1652	4	5	40981	My wife and 2 kids went here on a Monday. As most others mentioned, we needed reservations. There are maybe 4 tables for 4 in the entire place. The decor really does put you in mind of Paris. A little cramped, but fairly quiet, just enough sound to give the feeling of energy. Ã‚Â The waiter was patient in explaining some of the menu and wine selections. Service was quick, appetizers were out with…	0	Positive	['entire place', 'paris', 'wine selections', 'Ã¢ need', 'small place', 'filet mignon carpaccio', 'french onion soup', 'entrees', 'duck confit', 'tender/crispy texture', 'bistros steak frites', 'burnt flavor', 'red wine sauce', "daughter 's pork tenderloin", 'outstanding flavor', 'desserts', 'creme brule', 'number Ã¢', 'shallow ramekins', 'crunchy/creamy elements', 'time flat', 'apple tatin', 'big…
1653	4	5	41491	Thanks to a Yelp reviewer I found a gem in the Murray Hill area.. Actually Leslie D.s review was the key! Thx you Leslie we loved it. We began w/ a nice Cote Du Rhone.....Chapelle St. Arnoux. A nice red not too dry wine recommended over a drier Bordeaux....you can find that wine at a number of online store....excellent ! Ã‚Â I had the country patÃƒÂ¨....and we split that along w/ a rare filet fro…	0	Positive	['thanks', 'yelp', 'murray', 'hill area..', 'leslie d.s', 'thx', 'leslie', 'cote', 'rhone', '... ..chapelle st.', 'arnoux', 'dry wine', 'bordeaux', '... .you', 'online store ... .excellent', 'country patÃ£Â¨ ... .and', 'rare filet', 'white wine/ garlic pot', 'mussels ... .very', 'duck confit', 'lynne', 'risotto w/ lime ... ...', 'menu ... .lol ...', 'mon', 'nov.', 'delis ... ... .a crusty duck', …
1654	4	4	40924	First time for French food was a great experience! Had dinner here the other day, and have to say their half chicken with wild mushrooms and mashed potatoes is one of the most delicious dish I ever had. Escargot was a new taste too. Wine Steak and frites were decent though. I like the ambiance and coziness of the little restaurant, and prices were reasonable for French cuisine.	0	Positive	['french', 'great experience', 'wild mushrooms', 'delicious dish', 'escargot', 'new taste', 'wine', 'french']
1655	4	4	41233	Went here last night for dinner for the first time and it was pretty fantastic! I live in the neighborhood and was looking for a new place to get dinner before a movie Ã‚Â I'm so glad I found this spot. It's quite small Ã‚Â tucked away on 33rd St btwn 3rd Ave and Lex, but the ambience is part of its charm. You feel like you've walked into a true Parisienne cafe, it's very romantic, small dining r…	0	Positive	['went', 'new place', 'movie Ã¢', 'small Ã¢', 'st', 'ave', 'lex', 'parisienne', 'onion soup', 'beet salad', 'artichoke salad', 'crispy skin', 'juicy meat', 'parisienne', 'perfect french fries', 'sat', 'sun']
1656	4	4	41645	Magnifique. ! The salads we had, roasted artichoke and endive with pear, were perfectly dressed. Ã‚Â Mussels were delectable and the rarely found as such, skate, was sublime. Ã‚Â So many restaurant s in NYC, but this one is worthy of numerous return trips. Ã‚Â Did I mention the creme brulee? Perfect.	0	Positive	['magnifique', 'mussels', 'restaurant s', 'nyc', 'numerous return trips', 'creme brulee', 'perfect']
1657	4	5	40914	Came here for brunch on a Saturday... What a treat! I live in the area, and have always had trouble finding something that is in Midtown, not packed with tourists, reasonably priced and charming. Is it really too much to ask? The store itself is quite small, seating is limited. However, I was seated immediately at 12:15pm on a Saturday. The lighting was just right, and the just the right amount o…	0	Positive	['came', 'midtown', 'right amount', 'staff presence', 'lovely girl', 'white omelette', 'brunch prix fixe menu', 'oj', 'white omelettes', 'huge pillow', 'mushy bland', 'jane', 'flavorful piece', 'dinner ...', 'such reasonable price', 'convenient location', 'new favorite brunch places ...', 'midtown']
1658	4	5	41875	What a great little date spot! This tiny little French bistro is hard to get into without a reservation but once you're in you'll enjoy authentic French fare in a cozy atmosphere. I had the steak frites and my husband had the lamb ragu special--both were excellent and perfectly portioned.	0	Positive	['great little date spot', 'tiny little french bistro', 'french fare', 'cozy atmosphere', 'steak frites', 'lamb ragu']
1659	4	5	41663	LOVED this place! It is such a cute authentic fancy cafe looking french restaurant. The mussels (thai style) were just ok. I think I like my regular italian style mussels better. The frites were crispy and salty (just the way I like). The duck confit was AMAZING, with the tender duck meat and crispy skin, I could have eaten 10 servings, had a heart attack and died happy. WORTH IT. The Bistrot Ste…	0	Positive	['loved', 'cute authentic fancy cafe', 'french restaurant', 'thai style', 'regular italian style mussels', 'duck confit', 'amazing', 'tender duck meat', 'crispy skin', 'heart attack', 'worth it', 'bistrot', 'frites', 'to die for', 'well', 'green salad', 'standard spring mix', 'sauce home', '... ..', 'love this place']
1660	4	4	41153	Fantastic dinner! Highly recommend this restaurant! Great food, great ambiance, and great time!	0	Positive	['fantastic', 'highly', 'great food', 'great ambiance', 'great time']
1661	4	4	41806	Unequivocally French. Very well curated wine list, laid-back atmosphere. There were so many mussels in the pot, I am shocked I finished them. Frites were fresh cut and delicious. Great little French go-to!	0	Positive	['unequivocally', 'wine list', 'laid-back atmosphere', 'frites', 'french go-to']
1662	4	4	40938	Within walking distance of Pod 39, I tried Le Parisien and was not disappointed. Authentic and intimate, the food and service were first rate. Ã‚Â Shared a salad and totally enjoyed Steak/Frites with a terrific sauce - cooked perfectly and the prices were quite reasonable by NY standards. I'll go back next time in NYC. Bravo! Vive Le Parisien!	0	Positive	['pod', 'parisien', 'authentic', 'shared', 'steak/frites', 'terrific sauce', 'ny', 'nyc', 'bravo', 'vive', 'parisien']
1663	4	4	40720	This is not some gourmet Michelin star restaurant, but in terms of authentic Parisian cafÃƒÂ©s, it's probably as close as you're going to get in manhattan. Highly recommended if that's what you're going for. Staff was very nice and food was great. Atmosphere is the best thing, which is what you should be coming here for.	0	Positive	['michelin', 'star restaurant', 'parisian', 'highly', 'staff', 'atmosphere']
1664	4	5	40676	Great dinner for a great price! Can't wait to come back again.	0	Positive	['great dinner', 'great price', 'ca']
1665	4	4	40834	Brunch: Delicious! Egg was perfectly cooked in my eggs Benedict, and the Hollandaise sauce was so tasty! Each of my individual French fries were perfectly crispy. How is that possible? French toast was amazing too. And very friendly people.	0	Positive	['brunch', 'delicious', 'egg', 'benedict', 'hollandaise', 'individual french fries', 'friendly people']
1666	4	5	40701	Wonderful service, amazingly convenient location, lively atmosphere and reasonably priced. That being said, the food is the star! Ã‚Â Appetizers, entrees and dessert... all were sublime. Ã‚Â This place is a new fave.	0	Positive	['wonderful', 'convenient location', 'lively atmosphere', 'appetizers', 'dessert ...', 'new fave']
1667	4	3	40808	Soup, escargot and mussels were a 3.5 but the sancerre wine and ambience made up for the so-so food.	0	Neutral	['soup', 'sancerre wine', 'so-so food']
1668	4	4	40636	Very cozy, good food at a reasonable price	0	Positive	['good food', 'reasonable price']
1669	4	4	41538	Excellent food. I can't tell you how authentic the food is, since I'm not sure what makes steak tartare and french fries more or less french....suffice, it was good. The meat and salad veer towards the sweet side but not overwhelmingly so...the french fries were...french fries. Cute, small, comfortable place. I think it's reflected well by the reviews.	0	Positive	['excellent', "ca n't", 'steak tartare', 'french fries', 'french ... .suffice', 'salad veer', 'sweet side', 'french fries', '... french fries', 'cute', 'comfortable place']
1670	4	5	41247	I met my old boss for lunch yesterday. Ã‚Â The steak frites was excellent -- the pommes frites especially. Ã‚Â Nice selection of wines by the glass as well. Ã‚Â A worthy successor in Murray Hill to the old Bienvenue on 36th between Madison and 5th.	0	Positive	['old boss', 'steak frites', 'pommes frites', 'nice', 'worthy successor', 'murray hill', 'bienvenue', 'madison']
1671	4	2	40739	I do not recommend this place. Far too many French bistros to settle here. The mussels Parisienne were very dry and the French fries too salty. The duck dry as well although the potatoes and mushrooms had a nice zing with the spices used. Ordered artichoke salad for entree artichokes lovely seasoned although a tad over cooked. Did not pair well with the dressing and arugula. This place was recomm…	0	Positive	['far', 'french bistros', 'parisienne', 'french fries', 'duck dry', 'ordered', 'artichoke salad', 'entree artichokes', 'was', 'murray', 'hill area', 'thank', 'too']
1672	4	4	41438	Le Parisien is a quaint bistro reminiscent of a small Paris cafÃƒÂ©. Ã‚Â Start with the escargot and mop up the delicious green garlic sauce with plenty of bread that they bring to the table. Ã‚Â I usually never order salads at restaurants because too many are uninspired and boring, but the endive salad was creative both in taste as well as presentation. Can't go wrong with mussels here-- I have …	0	Positive	['parisien', 'quaint bistro', 'paris', 'start', 'delicious green garlic sauce', 'order salads', 'endive salad', 'ca', 'parisienne', 'espagnole', 'large', 'duck confit entrÃ£Â©e', 'small portion']
1673	4	4	41844	Le Parisien certainly lives up to its name; it does remind me of the casual Parisian food that I consumed while in Paris. My companion and I had the pate, steak frites, and salmon entrees. The steak was properly cooked to order with American-style doneness (i.e., a medium will not get you a French-style medium cooked steak, which is actually more of a medium-rare here in the states). The pate and…	0	Positive	['parisien', 'parisian', 'paris', 'steak frites', 'salmon entrees', 'american-style', 'french-style', 'prices', 'manhattan', 'seating', 'fire hazard', 'legal sense', 'reservations']
1674	4	5	41174	I love this place! Ã‚Â It is small and quaint and so authentic. Ã‚Â I spent years living in France and am always looking for places that have that je ne sais quoi (ugh, I know...) and Le Parisien has it. Ã‚Â We went there for dinner on a Friday and got a table by the window before the place filled up (and it fills up quickly!). Ã‚Â Service was great, everyone working there was so friendly and att…	0	Positive	['france', 'je ne sais quoi', 'parisien', 'Ã¢ service', 'incredible pride', 'steak tartare', 'great meal']
1675	4	4	40888	Have been here many times and the food is usually wonderful. Artichoke salad was wonderful. Ã‚Â Carpaccio lacked the meat. Ã‚Â it was hard to find under the salad, however what was there was tasty. Ã‚Â Roasted chicken was a tad overdone. Creme Brulee divine.	0	Positive	['have', 'artichoke', 'carpaccio', 'roasted', 'tad overdone', 'creme brulee']
1676	4	4	41393	Been here twice and absolutely love it! I came here for the mussels and boy, they are no joke! So good! I literally craved their mussels after coming here the first time. I had the Parisinne first time and the Thai second time. While both were excellent, the Thai is by far the much tastier one. It had so much more flavor and the Thai spices really complimented the mussels. I know I know, it's a F…	0	Positive	['been', 'parisinne', 'thai', 'thai', 'thai', 'french restaurant', 'thai', 'parissinne', 'french fries ...', 'pomme frites', 'atmosphere']
1677	4	4	40943	Husband and I yelped whatever French was nearby and Le Parisien came up and since it was one if the closer locations, we decided on this place. Great choice! We had no reservation but was seated right away (we got lucky!) the place is tiny. Ordered the duck pate for appetizers and we scarfed it down. Husband is not too fond of pate, but he liked this one. He ordered the bistrot steak frites, EXCE…	0	Positive	['husband', 'parisien', 'great choice', 'ordered', 'duck pate', 'husband', 'bistrot steak frites', 'excellent', 'duck confit', "'d order", 'steak frites', 'creme brÃ£ Â» lÃ£Â©e', 'loved', 'tiny space']
1678	4	5	41165	We really enjoyed our dinner here. Great food, my arugula salad was especially good. We will be back.	0	Positive	['great food', 'arugula salad']
1679	4	4	41652	We arrived a few minutes early for our 8PM reservation; a very pleasant lady said there would be a short wait for our table. Ã‚Â We waited outside as it was a pleasant evening and there is no space to wait inside. Ã‚Â The beet salad and the pear salad were amazing and another guest with our party raved about the wild mushroom soup selection they offered that evening. Ã‚Â The salmon and skate were…	0	Positive	['8pm reservation', 'pleasant lady', 'short wait', 'pleasant evening', 'beet salad', 'pear salad', 'wild mushroom soup selection']
1680	4	4	40983	Stayed in the Murray Hill neighborhood this weekend. My wife and I dined here on Friday night. We showed up a bit after 9:00 pm and were seated by 9:15. Definitely comparable to a Paris bistro based on how close together the tables are! I don't say this as a negative; I think it brings a charm to a place. It definitely invokes memories of our trip to Paris. Somehow Chez Denise at lunchtime was qu…	0	Positive	['stayed', 'murray', 'hill neighborhood', 'definitely', 'paris', 'invokes memories', 'paris', 'somehow chez denise', 'soup du jour', 'wild mushroom', "n't order", 'expensive ingredients', 'parisian', 'bistro steak frites', 'aka hangar steak', 'steak tartare', 'raw beef', 'anyway', 'good steak tartare', 'egg yolk', 'good eggs', 'nice briny undertone', "wife 's dish", 'paris', 'wine list', 'great s…
1681	4	4	41152	Legit French fare for a non-French price. Bona fide waiter, tasty but characteristically small portions. The duck confit was perfectly done. Delicious latte to cap off the night. I highly highly recommend!	0	Positive	['legit', 'french fare', 'non-french price', 'bona', 'fide waiter', 'small portions', 'duck confit', 'delicious']
1682	4	2	41748	Below average food and ambiance.	0	Negative	['below', 'average food']
1683	4	2	41020	The waiter was rushing us in and did not even care if we made a reservation or not. He seemed very uninterested in serving us when we decided not to drink. Mussels Marinieres was okay. A bit too salty, so I tried to eat with bread (a lot of bread). The french fries were super hard and juiced with smelly oil.	0	Positive	['mussels marinieres', 'french fries']
1684	4	5	41239	We had a lovely meal in a very relaxed and comfortable environment. Ã‚Â The food was delicious, the service friendly and low key. Ã‚Â All in all, I felt as though I was in Paris. Ã‚Â I loved it, and look forward to going again. Ã‚Â Thanks, Emil,for the recommendation!	0	Positive	['lovely meal', 'comfortable environment', 'low key', 'paris', 'thanks', 'emil']
1685	4	4	41776	Intimate, romantic, authentic, small tables, brusque service ... felt like I was in Paris.	0	Positive	['intimate', 'small tables', 'brusque service ...', 'paris']
1686	4	5	40696	really delicious-- we ordered escargot and the mussels espangole to start. heavenly. for our main courses my boyfriend ordered the duck confit and i got the poached salmon. loved every bite!! they don't make changes to the order, but when i mentioned my gluten sensitivity the server knew what i could eat and what i couldn't. they also serve wine in carafes if you aren't up for a full bottle of wi…	0	Positive	['mussels espangole', 'main courses', 'duck confit', 'gluten sensitivity', 'full bottle', 'reasonable choices']
1687	4	4	40974	Thanks Yelp- I was meeting a dear old high school friend, and she was coming into the City via train, and asked if we could meet near Grand Central. Ã‚Â I did a quick search on places near Grand Central, and came up with Le Parisien. Ã‚Â The short version of this place is don't judge a book by its cover- the restaurant is tiny, and frankly, it's a bit shabby (as is the bathroom, which is all of t…	0	Positive	['thanks yelp-', 'old high school friend', 'quick search', 'parisien', 'short version', "n't judge", 'bit shabby', 'delivered', 'Ã¢ dining companion', 'hot coffee', 'waiter', 'shrug', 'have', 'Ã¢ dining companion', 'waiter', 'kidding', 'hmph', 'espresso', 'tasty food', 'wine list', 'juicy pan', 'wild mushrooms', 'potato puree', 'order pasta', 'french', 'serious carbs', 'cherry tomatoes', 'serious…
1688	4	1	41003	The 14.95 fixe priced brunch brought me and my friends in Saturday morning. The meal started off great with a round of mimosas and great conversation. I unfortunately ordered the Croque Monsieur and was excited for it. But when I got my food, it was cold, the cheese was congealed and tasted like rubber. The ham tasted like package deli meat... The kind with the slime and the "brioche" was the end…	0	Positive	['great conversation', 'croque monsieur', 'package deli meat ...', 'bread loaf', 'ugh']
1689	4	4	40758	Went for dinner at 7:30 on a Saturday night, with a reservation. Tips: I would definitely go with a reservation--seating is very limited, and the space is small, so without a reservation on a Friday or Saturday night, getting a seat would take a while. Food: Ordered the steak tartare--friends ordered the french onion soup, endive salad, steak frites. The steak tartare was very yummy (although I'v…	0	Positive	['went', 'tips', 'ordered', 'steak tartare', 'french onion soup', 'endive salad', 'steak frites', 'steak tartare', 'raw meat', 'end bits', 'long fries', 'normal fries ...', 'steak frites', 'wine', 'good prices', 'sauvignon blanc', 'creme brulee', 'great choice', 'creme brulee', 'well-made brulee', 'french owners', 'good service manners', 'grabbing things', 'will', 'good place']
1690	4	4	41236	Tasty, freshly prepared French dishes at a good price. Ã‚Â Place is a little on the smaller side, but not bad.	0	Positive	['tasty', 'good price', 'Ã¢ place']
1691	4	4	41606	I'm really fond of this place. Ã‚Â It does have a more Parisian feel than a lot of other bistros in the city. Ã‚Â It's small and gets pretty loud--a better place for friends than an intimate date. Ã‚Â Steak frites are solid, wine was good, and I left very happy. Ã‚Â I'll definitely be back.	0	Positive	['parisian', 'intimate date', 'Ã¢ steak frites']
1692	4	5	41822	Great find in Murray Hill. The food was Ã‚Â delicious and very reasonably priced for the area. Service was warm and attentive. Very convivial despite the small room.	0	Positive	['murray hill', 'Ã¢ delicious', 'small room']
1693	4	4	40767	French onion soup, one of the best I've had. Not too salty yet flavorful. The evenly baked cheese on top does not overwhelm the onion soup at all. The beef tartar was very refreshing, didn't think I would finish it but I devoured it in less than 5 minutes. Loved it. Got the mussels as well, they were really fresh and meaty not dry. However the tomato base I choose for it was really light, wish I …	0	Positive	['onion soup', 'onion soup', 'beef tartar', 'loved', 'got', 'tomato base', 'waiters']
1694	4	5	41298	Excellent all around -- great food, truly outstanding service, and amazingly reasonable prices. Ã‚Â We're going back ...	0	Positive	['excellent', 'great food', 'outstanding service', 'reasonable prices']
1695	4	5	41657	Took a girl here for brunch, place was absolutely delicious. The eggs Benedict gave my mouth the best food orgasm it ever had. Real talk stop reading this and go eat here.	0	Positive	['took', 'benedict', 'food orgasm', 'real']
1696	4	5	41069	Gem... nothing fancy just fantastic food. Ã‚Â Wish the beer/wine options were a little more extensive. Ã‚Â All in all just a true French Bistro experience!	0	Positive	['gem', 'fantastic food', 'beer/wine options', 'bistro']
1697	4	4	41244	Went there for the brunch on a week-end. This is definitely a French place as everybody is French out there. Nice decor although not fancy. Food and service were good. Will go back.	0	Positive	['went', 'french place', 'nice', 'will']
1698	4	4	40623	Great brunch. Loved the atmosphere and our eggs florentine were cooked perfectly. Service was fast and my water glass was never left empty. The place is on the smaller side so plan accordingly if you have a big party!	0	Positive	['great brunch', 'loved', 'eggs florentine', 'water glass', 'big party']
1699	4	4	40822	The French toast is very fluffy! Apple compote and banana are fresh! Good meal!	0	Positive	['apple', 'good meal']
1700	4	4	40908	pleasant surprise	0	Positive	['pleasant surprise']
1701	4	4	41371	I came here with my friend for a belated birthday celebration (for me). Ã‚Â This is another hole in the wall spot but adorable nonetheless. Ã‚Â Not too fancy, not too dark, but it's just right. Ã‚Â The staff was extremely courteous and helpful; Ã‚Â We were assisted with wine selection, meal of the day, as well as dessert. Ã‚Â Our waiter saw that she gave me a birthday card and served my dessert w…	0	Positive	['belated birthday celebration', 'wall spot', 'adorable nonetheless', 'wine selection', 'birthday card', 'pretty authentic french food']
1702	4	4	41494	Small and quiet. Great service, and a small but unique menu with both French classics and unique dishes. Great wine selection with a wait staff that is more than willing to help you choose the perfect bottle. Nice portion size.	0	Positive	['small', 'great service', 'unique menu', 'french classics', 'great wine selection', 'perfect bottle', 'nice', 'portion size']
1703	4	4	41642	Stopped in here randomly for brunch and really enjoyed it. My boyfriend loved his eggs benedict, I was crazy about the frittata. Free sangria didn't hurt!	0	Positive	['stopped', 'eggs benedict', 'free', "n't hurt"]
1704	4	4	41387	A friend from Cali and I had brunch here this afternoon. She had a spinach omlette and specified she only wanted egg whites. Ã‚Â I had a Croque Monsiuer, which came with a salad. Ã‚Â The food was delivered fast, correct and delicious. Ã‚Â The service was prompt and our waters were refilled promptly. Ã‚Â For brunch, $13.95 gets you a tasty, satisfying entrÃƒÂ©e and a mimosa, san gria, coffee or OJ…	0	Positive	['cali', 'spinach omlette', 'egg whites', 'croque monsiuer', 'satisfying entrÃ£Â©e', 'san gria', 'oj', 'fruity wine']
1705	4	4	41168	get the steak!! delish	0	Neutral	[]
1706	4	4	40662	Good, unpretentious food. I had dinner there, late one Saturday, with my wife. The food was excellent, the wine was good. My wife had the special that night, striped bass, with ratatouille and olive tapenade. She loved it. I had a steak frites, and we shared a creme brulee. Service was quick and attentive, ambiance was not too noisy. We enjoyed ourselves. We will definitely return.	0	Positive	['unpretentious food', 'olive tapenade', 'steak frites', 'creme brulee']
1707	4	4	40715	Tiny place which plays into its 'boutique' feel which wasn't bad. Ã‚Â Nothing on the menu honestly looked authentic French aside from the traditional escargo but the service was a bid spacey with no urgency of accelerating the dining experience; so appropriate if you're looking for the 'authentic' french experience. Ã‚Â I will say however the Filet Mignon Carpaccio was quite elegant and tasty. Ã‚…	0	Positive	['tiny', 'traditional escargo', 'bid spacey', 'french experience', 'filet mignon carpaccio', 'duck', 'dessert menus', "ca n't", 'pretty good experience', 'cheap wine']
1708	4	4	40729	Delicious, authentic and very cute. Ate brunch there and definitely want to go back for dinner.	0	Positive	['delicious', 'ate']
1709	4	4	40906	Great french dinner! From the outside, I was expecting it to be a little fancier than it was inside. Ã‚Â Decor was not as charming as I expected, but then the food and service began and all worries of pretentiousness were thrown out the window. Just finished up a delicious dinner there with the gf. Ã‚Â They squeezed us in (squoze us in?) for a friday dinner at 7pm. Ã‚Â Staff very courteous to us …	0	Positive	['great french dinner', 'decor', 'delicious dinner', 'friday dinner', 'staff', 'goat cheese salad', 'right amount', 'french onion soup', 'right amount', 'fresh pepper', 'excellent choice', 'creme brulee', 'bit pricey', 'final bill', 'great meal overall', 'will']
1710	4	4	40930	Made an early - 6:30 is early by NY standards - reservation here for myself and my parents. It was the perfect atmosphere for us to catch up and eat well. The hostess/waitress/owner? Seated us immediately and was lovely despite Ã‚Â the demands of running the entire front of house. My parents go to France often, the atmosphere and in my father's words this place 'truly transports you to France and…	0	Positive	['made', 'ny', 'perfect atmosphere', 'seated', 'entire front', 'france', "father 's words", 'france', 'Ã¢ escargot', 'country pÃ£Â¢tÃ£Â©', 'tomato soup/goat cheese', 'calves liver', 'crispy skin', 'escargot', 'calves liver', 'white wine broth', 'profiteroles', 'ruby port', 'will']
1711	4	4	41836	This is a great find in the Murray Hill neighborhood. The place is small but cozy. I ordered the saffron and mustard cream mussels and was very satisfied by the taste. Lots of food for a great price. Service was adequate. Overall, no major complaints.	0	Positive	['murray', 'hill neighborhood', 'mustard cream mussels', 'lots', 'great price', 'overall', 'major complaints']
1712	4	5	40946	Family lunch... french style!! Ã‚Â Excellent food, wonderful service. and great atmosphere! A little small but just adds to it!	0	Positive	['family lunch ... french style', 'excellent', 'wonderful service', 'great atmosphere']
1713	4	5	41193	This is the real deal. Ã‚Â If you are looking for true French food Le Parisien is the place to go. Ã‚Â My wife had the duck confit and said it tasted just like it is prepared in France. Ã‚Â She is a French teacher and travels to France often. Ã‚Â I had the bistro steak and it was great. Ã‚Â It was more like chateaubriand then anything else!	0	Positive	['true french food', 'parisien', 'duck confit', 'france', 'french teacher', 'france', 'bistro steak']
1714	4	4	40731	I found Le Parisien as I was searching online for affordable brunch in NYC. I'm a visual learner, so the pics of the food looked amazing. We decided to give it a go. When we arrived we were greeted immediately and seated. I had the salmon benedict and it was really really good. The eggs were poached perfectly. I will definitely go back and try their dinner menu.	0	Positive	['parisien', 'affordable brunch', 'nyc', 'visual learner', 'salmon benedict', 'dinner menu']
1715	4	3	41212	We would rate Le Parisien a 3.5 if we could. Our party of four liked the casual setting and friendly staff. The steak frites was fantastic, poached salmon was good. Spinach salad was very good, but could have done with more goat cheese on it. Mussels did the job, frites were best. One person loved the roast squash soup with apple, though I thought it was too sweet. Would go again for an easy neig…	0	Positive	['parisien', 'casual setting', 'friendly staff', 'steak frites', 'spinach', 'goat cheese', 'mussels', 'roast squash soup', 'easy neighborhood dinner']
1716	4	4	41482	great place and great food....a little small though, but overall it is a nice little place...	0	Positive	['great place', 'great food ... .a', 'nice little place ...']
1717	4	4	41450	Adorable little French bistro in Murray Hill. Came here for Bastille Day with two friends an had a delicious dinner. We shared the Marseilles mussels, steak tartar, and duck confit, along with a great bottle of white wine. The restaurant is a little in the small side (~10-15 tables) so be sure to make a reservation ahead of time!	0	Positive	['adorable little french bistro', 'murray hill', 'came', 'bastille', 'delicious dinner', 'marseilles', 'steak tartar', 'duck confit', 'great bottle', 'white wine', 'small side', '~10-15 tables']
1718	4	4	40905	I really enjoyed this place. The atmosphere was quaint and they had a nice selection of wine and food to choose from. I had the salmon which was amazing and some pomme frittes. We also enjoyed the wine list and the staff was very helpful in making selections. Ã‚Â This was a good experience all around. Thanks for reading and enjoy.	0	Positive	['nice selection', 'pomme frittes', 'wine list', 'good experience', 'thanks']
1719	4	4	41096	This is a great brunch restaurant. Their weekend menu has a prix fix deal that includes a mimosa, a coffee, or Bellini with your meal. I ordered the croque monsieur. It was very tasty and I enjoyed it a lot. It also came with a salad on the side. The bread was awesome, the service was great, and the mimosa was pretty legit. It can get a little crowded during lunch so go around 12:30 or earlier if…	0	Positive	['great brunch restaurant', 'weekend menu', 'prix fix', 'bellini', 'croque monsieur', 'pretty legit', 'small', 'lots', 'keep', "n't scream", 'love', 'thank']
1720	4	4	40835	The food here was good as well as the service. I really enjoyed eating here and look forward to coming here with some other friends. The waiter was also very attentive and friendly which i appreciate.	0	Positive	[]
1721	4	3	41133	This place can be easily missed because it's a very unassuming, and also off of a main avenue. The inside is small so make reservations when you can. I needed a last minute place for dinner and they luckily had space. I had the duck confit - it was very well made, not overly oily, as I've had in some places, and well-seasoned. I didn't have a dessert but my friends had profiteroles, which they lo…	0	Positive	['main avenue', 'minute place', 'duck confit', "n't rush"]
1722	4	4	41018	I haven't been to France in almost 8 years (a little piece of me just died just having said that), but Le Parisien came pretty close to bringing me back without the use of teleporting. Don't know why but I was expecting more of a romantic high end atmosphere... and I'm glad that it wasn't. The mood was casual yet intimate and had a certain je ne sais quoi with its vintage posters, cafÃƒÂ© furnitu…	0	Positive	['france', 'parisien', 'romantic high end atmosphere ...', 'certain je ne sais quoi', 'vintage posters', 'cafÃ£Â© furniture', 'paris', 'pah-ree', 'french bistro', 'duck', 'mussels', 'tartare', 'double check', 'heck', 'appetizers', 'prosciutto', 'melon', 'fennel salad', 'melon ripe', 'oh', 'onion soup', 'hearty spoonful', 'broth/cheese/bread combo', 'entrees', 'confit', 'crispy potatoes', 'mushroo…
1723	4	4	41437	This is my new favorite. Its a cheap competitor to Balthazar with a limited menu. Food quality is as good and flavors are authentic french brassiere. Calves livers, steak, moules, pomme frit were all great. Escargot were overcooked and i suspect they are canned, but that's ok i'm not paying 20 bucks. Three ppl with a bottle of wine $150. Service is typical take it or leave it French	0	Positive	['cheap competitor', 'balthazar', 'authentic french brassiere', 'calves', 'pomme frit', 'escargot', "'s ok i 'm", 'wine $']
1724	4	3	41091	I am not a huge fan of American brunch...and this place does not meet the standards of the best brunch places I have been to in NYC...So, in terms of food, this place is average. However, I would like to say it is a very quaint place, the setting is a bit traditional. The manager (maybe?) appears to be French. The service is definitely nice, they are very attentive -- I did not try any sangria my…	0	Positive	['huge fan', 'american brunch ...', 'brunch places', 'nyc', 'quaint place', 'brunch + sangria/mimosa/coffee', 'nyc']
1725	4	5	41606	Really great gem of a place. Ã‚Â I felt like I was back in Paris while I was eating there. Ã‚Â I'd definitely go back again!	0	Positive	['really', 'great gem', 'paris']
1726	4	5	40843	Overall, it's an excellent, casual, French, neighborhood bistro. The food is tasty and recipes are authentic. The service, from my numerous experiences there, has always been consistent and solid. The owner and the staff are very friendly, but not too intrusive. The decor I find very cozy and alludes to a old Parisian atmosphere. I would recommend this place any time of the week. However, beware …	0	Positive	['overall', 'neighborhood bistro', 'numerous experiences', 'parisian', 'endive salad', 'goat cheese salad']
1727	4	3	41508	After suffering a withdrawal from the brasserie-life of Paris, my wife and I were delighted to discover this little spot. Service was prompt, decor was nice (a little over the top) and most importantly, the food was exactly what I was looking for. Escargot - 6 on a classic serving tray. Quite large. Very tasty & Mussles (moules mariniÃƒÂ¨res) is the quintessential French holiday dish. Prices seem…	0	Positive	['paris', 'little spot', 'escargot', 'classic serving tray', 'mussles', 'moules mariniÃ£Â¨res', 'french holiday dish', 'prices', 'les', "'d bump"]
1728	4	4	41734	Very neat and authentic little french place owned by a french couple. It made me feel as if I am in Paris. Would recommend the escargot, the mussels, daily fishes, and also the duck...none of them are the best in the city, but all are above average at very resonable prices. Also has a very friendly wine list that offers 10-15 different selections, not great, but pairs fine with its family setting…	0	Positive	['french place', 'french couple', 'paris', 'duck ...', 'resonable prices', 'friendly wine list', 'different selections', 'pairs fine', 'family setting', 'apple tart', 'cream brulee']
1729	4	1	41529	Can i have a little skate with my ammonia? Skate was so ammoniated the fumes shot through my nose and singed my brain. Saw someone else send back escargots. Whhyyyy is this place so popular? +1 star for prompt service and the authentic ambience. But ammoniated skate is unforgivable.	0	Positive	['skate', 'fumes shot', 'saw', 'whhyyyy', '+1 star', 'authentic ambience']
1730	4	4	40895	We Ã‚Â read some good reviews and made a reservation for a half hour later. Our table was ready upon arrival. This is a charming little restaurant in the Murray Hill neighborhood. We ordered a variety of foods, pea and mint soup was very fresh, warm lentil salad was delicious with a mild flavorful dressing and very fresh watercress. I had a grilled baby artichoke arugula salad with a few roasted …	0	Positive	['good reviews', 'charming little restaurant', 'murray', 'hill neighborhood', 'mint soup', 'warm lentil salad', 'mild flavorful', 'fresh watercress', 'baby artichoke arugula salad', 'duck breast', 'white peaches']
1731	4	5	41560	Came here for dinner last week. The atmosphere was cozy and charming. And the food was FANTASTIC. I ordered the pappardelle pasta and my friend ordered the pork. Both were excellent. Will definitely be returning.	0	Positive	['came', 'fantastic', 'pappardelle pasta', 'will']
1732	4	3	41615	Wanted to like it. Ã‚Â The steak frites were not terribly good. It was cooked right but onion glaze was a tad strange and meat a was a little sinewy. Ã‚Â The fries were over cooked just a bit. Service was unattentive. No baguettes not any cheese to be found. Parisien? I'm afraid not...	0	Negative	['wanted', 'steak frites', 'onion glaze', 'parisien']
1733	4	5	40972	Went there with a couple of girlfriends for brunch and then again with a friend for dinner. Ã‚Â They don't take reservations for brunch but there was no wait since we arrived shortly after they opened. Everything was delicious. For brunch: Ã‚Â We had the poached eggs with salmon, ham and gruyÃƒÂ¨re sandwich, and eggs florentine with spinach. Each dish comes with a drink (we had mimosas and sangri…	0	Positive	['went', 'gruyÃ£Â¨re sandwich', 'eggs florentine', 'filet mignon carpaccio', 'marinieres', 'duck confit', 'nice crispy skin', 'apple pie', 'ice cream which..', "n't amaze", 'private conversation']
1734	4	4	41513	My overall experience here was very Ã‚Â enjoyable. With a reservation at 7pm on a Friday night, I was happily seated 10 mins earlier while waiting for my friends to arrive. The wine here is really inexpensive. A not-so-fancy bottle of wine starts at $35, which is almost unheard of in the area. I would highly recommend the mussels. Great portion to share and is accompanied by a side of fries. All …	0	Positive	['overall experience', 'not-so-fancy bottle', 'great portion', 'steak frites', 'duck confit']
1735	4	4	41460	Have actually gone twice. Ã‚Â The first time for dinner and then for brunch. Ã‚Â Both times a great experience. Ã‚Â Wife had the liver, that was very good, I had the steak and frits, which despite being marinated which I normally dont like, was very good. Ã‚Â Service was excellent. Ã‚Â Best point, you can order a 1/2 litre of wine, like in Europe or Canada. The Brunch was also very good!	0	Positive	['have', 'great experience', 'wife', 'Ã¢ service', 'europe', 'canada', 'brunch']
1736	4	4	41368	being from Canada and noticing how inexpensive the wine was it was a no brainer ordering up a nice Grand Cru bottle at $49. I really enjoyed the food here: buttery escargot, tender juicy steak and the roasted artichoke shrimp. every dish was very flavorful and prepared flawlessly. the service was equally exceptional. Overall great value resto in nyc be sure to book reservations as seating is limi…	0	Positive	['canada', 'cru', 'buttery escargot', 'tender juicy steak', 'artichoke shrimp', 'overall', 'great value resto', 'book reservations', 'paris style dÃ£Â©cor resto']
1737	4	4	41164	Delicious brunch. I've been here four times for brunch. It is consistently great. Highlights include the goat cheese frittata and the French toast. Minus one star for the price increase and the cramped quarters.	0	Positive	['delicious', 'highlights', 'goat cheese frittata', 'minus', 'price increase']
1738	4	4	41674	Lovely place, perfect for a casual, well-prepared meal. Ã‚Â Small, intimate, maybe a little noisy but for just two people not a problem. Ã‚Â Excellent service, very friendly and accommodating, we felt right at home. Ã‚Â Appetizers (beef carpaccio and duck pate) were terrific, first rate; mussels and steak frites main courses were good to very good, especially the frites, fabulous. Ã‚Â Apple tarte…	0	Positive	['lovely place', 'well-prepared meal', 'small', 'excellent', 'appetizers', 'beef carpaccio', 'duck pate', 'steak frites', 'main courses', 'apple', 'tarte tatin', 'vanilla ice cream', 'satisfying dessert', 'wine', 'nyc', 'perfect place', 'york', 'richard k. scher']
1739	4	4	40819	One of the few French restaurants close to me. Small and tidy, serves great french cuisine. Also, for the price, the lunch is a great value.	0	Positive	['french restaurants', 'small', 'great french', 'great value']
1740	4	1	41309	Kitchen was closed at 10:15, so o early.	0	Neutral	['kitchen']
1741	4	5	41722	Paris in NYC! Really reminded me of a Parisian restaurant - cozy space, open windows, cute decor, I can go on. We were seated immediately despite not having reservations. I had the steak & fries and my company ordered the salmon. Both dishes were EXCELLENT and the portions were just right.	0	Positive	['nyc', 'really', 'parisian', 'cozy space', 'cute decor', 'excellent']
1742	4	3	40807	Cute little cafe with a great $13.95 brunch option that comes with one drink. Ã‚Â This price is on the menu, so not sure why this is also their yelp check-in offer--no need for that! Food came out pretty quickly... the eggs benedict is better than the garden omelet which was bland. Ã‚Â Fries are good and salad is fresh.	0	Positive	['cute', 'great $', 'brunch option', 'yelp check-in', 'eggs benedict', 'garden omelet', 'fries']
1743	4	5	41669	Le Parisien is a small and cozy French bistro. Ã‚Â Reminds me of France! I ordered the Pouched Eggs with Salmon Gravlax on English Muffins with Hollandaise Sauce with a glass of Sangria for $15. Ã‚Â The Grilled Steak Sandwich on Ciabatta and the Mussels with Garlic and White Wine Sauce were yummy. Ã‚Â Great brunch spot and I will definitely be coming back.	0	Positive	['parisien', 'french bistro', 'reminds', 'france', 'pouched eggs', 'salmon gravlax', 'english muffins', 'hollandaise sauce', 'sangria', 'grilled', 'sandwich', 'ciabatta', 'mussels', 'garlic', 'wine sauce', 'great brunch spot']
1744	4	4	41516	We had a very good meal at Le Perisien. There were three of us and all of our food was good. My husband said his tomato soup was some of the best he's ever had. The atmosphere is simple, but nice. The service was excellent. Fair prices, especially for the city. Would definitely recommend it if you are looking for a reliably good meal at a reasonable price.	0	Positive	['good meal', 'perisien', 'tomato soup', 'fair prices', 'good meal', 'reasonable price']
1745	4	4	41335	Cute little spot for brunch, felt tiny with lots French flair (...literally there's a ton of French iconography adorning the walls). Reasonable brunch deal for $14 that comes with one drink, coffee or cocktail or juice. I had to order a croque monsieur which was outstanding but sadly didn't come with fries (fries are only served with the egg meals). Ã‚Â I paid extra to get coffee and fries; the f…	0	Positive	['cute', 'french flair', 'french', 'reasonable brunch', 'croque monsieur', 'egg meals', 'croque monsieur']
1746	4	3	40994	Having had dined here twice before, I realized the place is either a hit or miss - the food was completely different the first and second time around. First, the atmosphere is definitely very genuine and akin to a bistro in Paris. Slow service where you really gotta sip on some wine and chat. For the first visit I had the Espagnole, chorizo mussels which were delicious..i literally wanted to slur…	0	Positive	['paris', 'ta sip', 'espagnole', 'chorizo mussels', 'french onion soup', 'pork tenderloin', 'overall', 'hit experience', 'thai', 'appetizer portion', 'espagnole', 'potato purÃ£Â©e', "friend 's steak frites", 'menu item', 'juicy', 'steak frites', 'sirene', 'creative items', 'sirene']
1747	4	5	40651	Excellent, real bistro-style French restaurant, with steak-frites as good as what you could get in Paris. Fantastic desserts (especially the profiteroles). Good atmosphere, good wine choice and great service. Wish I lived a LOT closer to this place. If I'm in New York again, I'll definitely be back.	0	Positive	['excellent', 'real bistro-style', 'french restaurant', 'paris', 'fantastic', 'good atmosphere', 'good wine choice', 'great service', 'lot', 'york']
1748	4	4	41880	Came here with a couple of friends for some delicious french food. Ã‚Â Great selection of wine. Mussels --awesome flavor, huge bowl (great for sharing) Steak fritz --the winner of the table!!! yum yum yum, perfectly cooked, huge slab of fries. Envy of the table. Fresh fish -some time of cod, good flavor, medium portion *Make reservations* or you will be waiting a bit, very small inside (~15 table…	0	Positive	['came', 'delicious french food', 'great selection', 'mussels', 'awesome flavor', 'huge bowl', 'steak fritz', 'yum yum yum', 'huge slab', 'envy', 'fresh fish -some time', 'good flavor', 'medium portion *make reservations*', '~15 tables']
1749	4	4	41523	This is a cute little restaurant we found. Very small but the food was fantastic. I had the special for the day which was the skate fish, which was flavored nicely with the mushroom. Mussels marineres were good with the white wine and garlic broth even though it was a bit over cooked, the mussels came to be quite small. Overall I would recommend this place we've tried a couple other appetizers th…	0	Positive	['skate fish', 'mussels', 'white wine', 'garlic broth', 'overall', 'price', 'french restaurant']
1750	4	3	41384	Nothing special, it might be because I have eaten in Paris or maybe because it was bland and flavorless but I am totally not impressed nor would I need to go back. The atmosphere is nice... you do feel like you in Paris but the food doesn't match the atmosphere. We had escargot, potato and garlic soup, the mussels and the duck confit and none of those dishes were impressive. They weren't bad but …	0	Positive	['paris', 'nice ...', 'paris', 'garlic soup', 'duck confit', "n't good"]
1751	4	4	40741	I went here for my small birthday brunch with a group of 5 women. Previously, on the phone, I was told the space is small and not conducive for big groups but was advised that I should arrive later for a better chance of getting a table (since they don't take reservations). I arrived at 1PM and as soon as my full party arrived they accommodated 5 of us in a very packed bistro! Fantastic and relia…	0	Positive	['small birthday brunch', 'previously', 'big groups', 'full party', 'fantastic', 'croque monsieur', 'hollandaise sauce', 'large variety', 'healthier options', 'tall couches', 'wonderful', 'lovely people', 'water glasses']
1752	4	5	41084	The food here is great, been eating here every time I come to NYC. This is an example of what makes a good restaurant - excellent food, reasonable pricing (have not raised prices in 3 years). The decor is simple, yet unusual, makes you feel like you are dining in a small bistro in Paris :-)	0	Positive	['nyc', 'good restaurant', 'excellent food', 'reasonable pricing', 'small bistro', 'paris']
1753	4	5	41334	My boyfriend and I stumbled upon this place for lunch while we were visiting the city and it was so good we came back for the Sunday brunch! Ã‚Â For lunch we split an onion soup and then the portobello sandwich for me and a chicken sandwich for him. Ã‚Â Both were amazing- all of the ingredients were fresh, flavorful, and well presented on the sandwich (I hate when you get served a sandwich that i…	0	Positive	['onion soup', 'portobello sandwich', 'chicken sandwich', 'favorite sandwich', 'salmon gravlox', 'french', 'comfortable environment', 'staff']
1754	4	4	41348	This is such a nice little find, in the heart of midtown east. Ã‚Â I would never have though to go out to this area for food, but we happened to be in the area. Ã‚Â I poked my eyes through the window and saw that it was full, and there was one table left. Ã‚Â Surely it was a sign - and at $13.95 for brunch with a drink, you can't beat the price. Two of us had the Eggs with Salmon Gravlax and one …	0	Positive	['surely', "ca n't", 'eggs', 'salmon gravlax', 'mushroom omelette', 'asiago cheese', 'eggs', 'salmon', 'raw egg', 'ketchup', 'steel cup', 'preventative measures', 'bellini', 'sangria', 'tight little space', 'france', 'paris']
1755	4	4	41035	Good bistro fare in a cozy, friendly atmosphere on the left bank of Murray Hill. Bon appetit!	0	Positive	['good bistro fare', 'friendly atmosphere', 'left bank', 'murray hill', 'bon']
1756	4	4	40694	Came here about a week ago for an early-ish (6:30) dinner on a Thursday. The space is small and cozy, but the place wasn't crowded enough for my date and I to not feel squished. And there were candles on the table. Lovely. They had a great wine selection, and the service was quick (without being over-bearing) and friendly. The bread and butter they brought us while we waited for the food was nice…	0	Positive	['came', 'great wine selection', 'super crunchy', 'addictive escargot', 'pesto-like sauce', 'white fish', 'whole meal', 'pork tenderloin', 'serious food envy', 'crispy bacon', 'melt-in-your-mouth tenderloin', 'trade entrees', 'creme brulee', 'great experience']
1757	4	5	41045	This is the best french place I've ever been to; impressed by their food. Ã‚Â Most of the French restaurants are very salty but this place is just right. Ã‚Â The atmosphere is cozy, intimate and friendly. Ã‚Â The interior design is like a French apartment... Ã‚Â It makes you feel like you are eating at a friend's house.	0	Positive	['french place', 'french restaurants', 'interior design', 'french apartment ... Ã¢', "friend 's house"]
1758	4	4	40708	We stopped by Le Parisien for Sunday dinner and had an amazing experience. My brother, who was dining with me, said he had never felt more "transported" in a restaurant. It did feel like Paris. The food was exceptional. We got the country pate to start which was rich and subtle and delicious. Then I had the skate wing with orange sauce and my brother had the steak tartare with fries. My fish was …	0	Positive	['parisien', 'amazing experience', 'paris', 'country pate', 'skate wing', 'orange sauce', 'steak tartare', 'tremendous portion', 'good tartare', 'whole meal', 'definitely']
1759	4	4	41166	A neighborhood French spot that takes you out of the neighborhood. My little sister took me here for my birthday dinner. We had reservations for the tiny (maybe 15 table) spot, but I got the impression that the people sitting at the other tables were regulars. The space itself has been made to look like a small Left Bank bistro complete with fading French posters and newspapers about World Cup vi…	0	Positive	['french spot', 'birthday dinner', 'left', 'bank bistro', 'french posters', 'world cup victories', 'salmon entre', 'pino grigio', 'dinner experience', 'parisien']
1760	4	5	41679	Good quality and cheap unique price. Authentic French. I got awesome eggs, chips and mimosa.	0	Positive	['good quality', 'cheap unique price', 'authentic', 'awesome eggs']
1761	4	4	41427	Had a lovely lunch here. It has an authentic French menu and my favorites were the escargot and dessert - ÃƒÅ½les flottantes. The latter is very hard to find and if you ever see it, order it! It's a vanilla crÃƒÂ¨me anglaise with meringue 'island' atop. Perfection! The only downside is the place is quite small and cramped... but it's not uncomfortable and the service was very good.	0	Positive	['lovely lunch', 'french menu', 'Ã£Å¾les flottantes', 'vanilla crÃ£Â¨me anglaise', "meringue 'island", 'perfection']
1762	4	4	40910	Purpose of visit: Thursday night dinner with another couple. Our friends suggested we go to this local neighborhood restaurant. It is a cozy place with about 15 tables. Definitely a nice intimate warm casual atmosphere. We ordere a nice bottle of cabernet which was pleasantly priced. Appetizers came out quickly, my classic french onion soup was nice and hot and not too cheesy or overwhelmed with …	0	Positive	['purpose', 'night dinner', 'local neighborhood restaurant', 'cozy place', 'definitely', 'nice intimate', 'warm casual atmosphere', 'nice bottle', 'appetizers', 'classic french onion soup', 'red sauce', 'excellent', 'mussells', 'sauce adde', 'bit o', 'main course', 'pork mendallions', 'normally', "wife 's steak dish", 'excellent', 'nice busy vibe', 'perfect', 'reasonable price']
1763	4	5	41545	Unbelievable value for the dollar. Ã‚Â Both for the food and the wine list. Ã‚Â If you are seeking great Steak Frittes for a super price, this is your place. Ã‚Â A terrific neighborhood find!	0	Positive	['unbelievable value', 'wine list', 'great steak', 'frittes', 'super price', 'terrific neighborhood']
1317	4	4	41757	Came here for brunch Saturday noon and were pleased to find no line unlike Penelope's. We ordered the frittata and French toast, both were great! Frittata was fluffy and filling and came with fries. The place is quite cramped and the brown curtain hanging on the inside of the front door (to keep cold air out) was a little bit weird. But since the food was good and we didn't have to wait to be sea…	0	Positive	['came', 'penelope', 'frittata', 'brown curtain', 'front door', 'cold air', 'bit weird']
1764	4	4	41720	Tasty and great neighborhood French bistro. Been twice and would go back again. I recommend the duck confit, steak and tarte tatin.	0	Positive	['tasty', 'great neighborhood', 'french bistro', 'been', 'duck confit', 'tarte tatin']
1765	4	4	41046	Took an early dinner there. Ã‚Â Very accomodating when I asked to re-charge my laptop. Ã‚Â Soup of the day was parsnip and leek which is very authentic French country fare. Ã‚Â Entree was skate served on a tasty mound of spinach and broccoli. Ã‚Â Accompanied by a pleasant Sancerre from the by-the-glass menu. Ã‚Â Nice experience!	0	Positive	['took', 'early dinner', 'soup', 'french country fare', 'entree', 'tasty mound', 'accompanied', 'sancerre', 'by-the-glass menu', 'nice']
1766	4	3	40749	This place is adorable!!! And an amazing deal for brunch! We had a couple things go wrong, but all in all, a nice time. For only $14 bucks, you get a mimosa/sangria or coffee + entree. With everything included, it's still less than $20, which is amazing. Place is SO CUTE. It's French and all the people who work there are French and all the decorations on the walls are French. Love it. It's pretty…	0	Positive	['couple things', 'nice time', 'coffee + entree', 'so cute', 'love', 'perfect vibe', 'eggs florentine', 'poached eggs', 'comes', 'small salad', 'french fries', 'english', 'definitely', 'brunch meal', 'def good', 'mimosa', 'pretty tasty', 'coffee everywhere', 'coffee', 'free refills', 'water glass', 'gross bumpy dirt residue']
1767	4	3	40926	Let me first say that I'm not a fan of French cuisine. Ã‚Â I'm a bit clueless as to what to order, which explains why I ordered the pasta instead of something more frenchy. The restaurant ambiance is very cozy with a tables along both walls in an open layout. Ã‚Â Not a bad place for a date night, although I did come here earlier in the evening so the place wasn't packed at that time. Ã‚Â Service …	0	Positive	['french', 'bit clueless', 'restaurant ambiance', 'open layout', 'bad place', 'date night', 'Ã¢ service', 'open table', 'pappardelle pasta', 'french restaurant', 'bit average', 'bit bland', 'portion', 'potatoes person', "ca n't", 'overall', 'good place', 'good meal', 'french', "ca n't", "'ll return", 'regular place', 'reasonable prices', 'menu items']
1768	4	4	41116	Authentic french restaurant, great for brunch, shared the salmon and mushroom omlette and mimosa!!	0	Positive	['authentic', 'french restaurant', 'mushroom omlette']
1769	4	5	41564	I thought this place was just fabulous! Lovely place but not super posh or pretentious. Very authentically French. This was one of very few places that every single plate I tried was outstanding. My boyfriend and I each got an app, main course and dessert. All parts were so so tasty and enjoyable ( I sampled every plate). We also each got one drink and the bill came out to about $100 including ti…	0	Positive	['lovely place', 'super posh', 'main course', 'overall', 'ca', 'simply', 'great place']
1770	4	4	41290	After poring over the brunch menu, I decided on the eggs florentine with a mimosa (of course!) and both were quite tasty. Yum yum spinach! This was my first time having Ã‚Â eggs florentine and I am definitely going to get it again. Also, the fries are addicting so if you know you won't be able to finish, bring someone who you know will help you eat them! Also, I'm not sure if it was a glitch in t…	0	Positive	['brunch menu', 'eggs florentine', 'yum', 'yum spinach', 'Ã¢ eggs florentine', "wo n't", 'credit card', 'chase']
1771	4	1	41010	Scam alert! Be careful and check your credit card statement if you go here! These guys charged me a $90 tip on a ~$15 bill, thankfully I noticed it on my statement and Amex will take care of it.	0	Negative	['scam', 'be', 'credit card statement', '~ $', 'amex']
1772	4	5	40685	Have been here for brunch and dinner and had a great time both times. The food is great, and the brunch prix fix is a great deal. Good service as well. One of the best spots in the neighborhood. Great for date night.	0	Positive	['have', 'great time', 'brunch prix fix', 'good service', 'date night']
1773	4	4	41821	It was a nice experience. Ã‚Â I don't have a ton to say either way. Ã‚Â A bit cramped. Ã‚Â Service was great though and the food was lovely. Ã‚Â My girlfriend was very happy - which is always a plus. Ã‚Â Wine, food, really pleasant service. Ã‚Â Good stuff. Sorry - don't have a ton more to say. Ã‚Â Prolly why it isn't a 5	0	Positive	['nice experience', 'Ã¢ service', 'wine', 'pleasant service', 'good stuff', 'sorry', 'prolly']
1774	4	4	40819	It's really cozy, but that gives it charm. Ã‚Â The food was tasty and the waiters were friendly. I would go back.	0	Positive	[]
1775	4	5	41166	This place is as good as it gets. It's a hidden gem in Murray Hill of all places. Ã‚Â I'm almost afraid to write about it, as it's been my secret go-to place. Ã‚Â It's honest real French bistro food prepared by a French chef, served by French ex-pats. Ã‚Â It ain't fancy, and it ain't trying to be trendy. It's perfect. Ã‚Â It's small and it's crowded. The food is always skillfully and deliciously …	0	Positive	['murray hill', 'secret go-to place', 'honest real french bistro food', 'french chef', 'french', "ai n't fancy", "ai n't", 'start', 'artichoke salad', 'omg', 'entrees', 'known-for mussel preparations', 'crispy frites', 'real-deal duck confit', 'crispy potatoes', 'wild mushrooms', 'frisee salad.. Ã¢', 'marais', 'roast chicken', 'pomme puree', "cafe 's liver", "cold winter 's night", 'oh', 'steak f…
1776	4	4	40908	This place is very small and the decor seems depressing for a place that otherwise seems so French. The man waiting on us and seating us was great, he was very helpful. A lot of the patrons that came in were speaking French. Let's start with the bad. The coffee. Very bad. It was bitter and watered down. I accidentally put way too much creamer in it, but even the excess couldn't give it any flavor…	0	Negative	['everyone', 'taste place']
1777	4	4	41240	Wonderful meal at a good price point for NYC! We loved the Grilled Artichoke salad and the Thai Pei Mussels. Ã‚Â Atmosphere reminds me of small cafes in Paris.... :D	0	Positive	['wonderful', 'good price point', 'nyc', 'grilled artichoke', 'thai pei mussels', 'atmosphere', 'small cafes', 'paris']
1778	4	2	40863	Average for brunch. Prix fixe is reasonable for NYC standards BUT there is nothing remarkable about the food. Decor and wait staff aside, it's not French by any stretch of the imagination. My food was bland and shapeless--and who serves French fries at brunch? Hash browns would be better. Not to mention my "wild mushroom" omelette was placed on top of the side salad, wilting all the lettuce and d…	0	Positive	['average', 'nyc', 'but', 'decor', 'french fries', 'hash', 'wild mushroom', 'side salad', 'your', 'average diner', 'tastier breakfast']
1779	4	5	41868	Other reviews are correct this is indeed a little gem! Made a reservation but still waited 20 minutes or so. It was ok as you see that people come to converse over fantastic french faire. Very much Ã‚Â bistro style, simple solid menu and a attentive staff. Wine list is a bit lacking but I liked the '09 Gigondas(good vintage and great subregion) with my calf liver and it paired well with the duck …	0	Positive	['made', 'fantastic french faire', 'Ã¢ bistro style', 'simple solid menu', 'attentive staff', 'wine', 'gigondas', 'good vintage', 'great subregion', 'calf liver', 'prices', 'definitely']
1780	4	3	41121	This place is pretty OK for brunch with groups of less than 4. The wait is usually short, especially compared with Penelope's (this was 20 minutes for us). However, the food is pretty average in my experience. I've had the grilled chicken sandwich and croque monsieur before and both were pretty bland tasting. However, they do serve a pretty mean french fry.	0	Positive	['penelope', 'pretty average', 'chicken sandwich', 'croque monsieur', 'pretty bland', 'french fry']
1781	4	4	41000	Great food and service. Duck confit was well prepared. Would go back many times. Very small, cozy restaurant.	0	Positive	['great food', 'duck', 'cozy restaurant']
1782	4	5	41791	Love this place! The restaurant was on a street not on an avenue. The target customers are not tourists but mostly ppl in the neighborhood(like me) or ppl who learn about the restaurants through word of mouth. It was snowing on the day we went to this place for dinner and the place was packed. I ordered the Steak frites and the steak was perfectly cooked to medium rare as requested. The frites we…	0	Positive	['love', 'target customers', 'steak frites', 'pork tenderloin', 'herb butter sauce']
1783	4	5	41659	Found this place by accident on a trip into NYC on a Saturday morning. Brunch was being served and is a good price for the city and comes with a mimosa. Additional is only $5 more and in New York that is not bad. Food was really good and quick service. Would def come back.	0	Positive	['found', 'nyc', 'brunch', 'good price', 'additional', 'york', 'quick service']
[truncated: 3,660 more rows]
